# Supplementary material
Source: publisher figshare collection journal article supplement (https://gsajournals.figshare.com/ndownloader/files/21211530)
Supplement: Supplementary file 1 [file 21211530]

## Sheet: Copy of Table S18
NBF_ovaries_albopictus_vs_aegypti_deseq2									PBM_ovaries_12hr_albopictus_vs_aegypti_deseq2									PBM_ovaries_24hr_albopictus_vs_aegypti_deseq2									PBM_ovaries_36hr_albopictus_vs_aegypti_deseq2									PBM_ovaries_48hr_albopictus_vs_aegypti_deseq2									PBM_ovaries_60hr_albopictus_vs_aegypti_deseq2
Ortholog name	baseMean	log2FoldChange	lfcSE	stat	pvalue	padj			Ortholog name	baseMean	log2FoldChange	lfcSE	stat	pvalue	padj			Ortholog name	baseMean	log2FoldChange	lfcSE	stat	pvalue	padj			Ortholog name	baseMean	log2FoldChange	lfcSE	stat	pvalue	padj			Ortholog name	baseMean	log2FoldChange	lfcSE	stat	pvalue	padj			Ortholog name	baseMean	log2FoldChange	lfcSE	stat
ort002842	3514.02	-16.7841	3.67421	-4.56808	4.92e-06	0.00361779			ort011644	1681.94	-8.62243	2.15876	-3.99417	6.49e-05	0.306465			ort003444	2105.94	10.2456	2.47178	4.14502	3.4e-05	0.0989135			ort003380	23864.2	12.7515	2.79445	4.56315	5.04e-06	0.0320789			ort011644	5444.96	-11.4372	2.61622	-4.37165	1.23e-05	0.0489567			ort001597	34622.7	-11.7751	2.59093	-4.54475
ort007608	2480.22	-13.8387	3.18727	-4.34187	1.41e-05	0.00368771			ort003408	1100.68	-8.59559	2.20753	-3.89375	9.87e-05	0.306465			ort003986	1573.97	9.82512	2.44707	4.01505	5.94e-05	0.0989135			ort007782	74375.6	-10.7387	2.55537	-4.20242	2.64e-05	0.0366411			ort003986	3907.83	10.9042	2.57511	4.23446	2.29e-05	0.0489567			ort010989	10861.7	-12.2727	2.71253	-4.52445
ort007782	10116.4	-11.8666	2.74188	-4.32793	1.51e-05	0.00368771			ort005715	1875.93	7.53753	2.00928	3.75136	0.000175876	0.306465			ort007870	6165.07	8.6636	2.18466	3.96566	7.32e-05	0.0989135			ort001699	3826.21	11.9178	2.86627	4.15795	3.21e-05	0.0366411			ort003444	4794.52	10.6141	2.5122	4.225	2.39e-05	0.0489567			ort007782	76070.1	-11.4367	2.54557	-4.49279
ort009174	1338.25	-15.3913	3.60795	-4.26595	1.99e-05	NA			ort010783	1249.26	7.74051	2.07334	3.73335	0.000188946	0.306465			ort000329	1541.24	-9.79664	2.47772	-3.95389	7.69e-05	0.0989135			ort003444	4296.57	11.5	2.76679	4.15645	3.23e-05	0.0366411			ort002574	2276.31	10.5393	2.58943	4.07014	4.7e-05	0.0489567			ort002565	10691.8	-11.0797	2.55508	-4.33633
ort008320	822.744	-14.6895	3.57586	-4.10797	3.99e-05	NA			ort004843	808.378	-8.14895	2.18809	-3.72423	0.000195914	0.306465			ort010783	1899.82	8.92528	2.28699	3.90263	9.52e-05	0.0989135			ort008360	7288.21	10.8471	2.61983	4.14038	3.47e-05	0.0366411			ort001120	2113.36	12.0177	2.95555	4.06615	4.78e-05	0.0489567			ort011644	5509.98	-10.9713	2.58646	-4.24181
ort008178	546.526	-14.0994	3.55056	-3.97103	7.16e-05	NA			ort009178	498.33	-9.0383	2.47242	-3.65566	0.000256525	0.306465			ort008779	923.439	10.056	2.60817	3.85558	0.000115453	0.0989135			ort002306	3928.37	11.3707	2.75649	4.12507	3.71e-05	0.0366411			ort007666	1938.19	11.8929	2.94897	4.03288	5.51e-05	0.0489567			ort003986	3250.16	11.2145	2.66865	4.20229
ort009354	516.984	-14.0192	3.54731	-3.95208	7.75e-05	NA			ort001702	522.692	9.94812	2.73331	3.63959	0.000273077	0.306465			ort003408	1099.13	-9.89397	2.57586	-3.84104	0.000122515	0.0989135			ort006356	7803.07	10.6235	2.58749	4.10573	4.03e-05	0.0366411			ort002306	2014.78	10.3631	2.57779	4.02016	5.82e-05	0.0489567			ort001120	1826.73	11.9684	2.9843	4.01045
ort001100	728.379	-12.0708	3.09634	-3.89842	9.68e-05	NA			ort003986	823.893	7.5987	2.10721	3.60605	0.000310891	0.306465			ort008775	1461.37	-8.98168	2.34514	-3.82991	0.000128188	0.0989135			ort004044	2937.56	12.5366	3.09383	4.05213	5.08e-05	0.0366411			ort007870	6296.21	9.42105	2.34769	4.0129	6e-05	0.0489567			ort004134	2124.6	-11.9186	2.9745	-4.00693
ort007986	704.745	-12.0232	3.094	-3.88598	0.000101918	NA			ort010247	474.922	9.8097	2.73442	3.5875	0.00033387	0.306465			ort000026	1033.13	-10.8053	2.84399	-3.79935	0.000145079	0.099508			ort011644	2777.91	-11.4225	2.82899	-4.03768	5.4e-05	0.0366411			ort009354	1258.43	-10.3233	2.66065	-3.88	0.000104457	0.0757897			ort007870	4416.55	9.43304	2.39019	3.94656
ort000026	347.118	-13.4445	3.52567	-3.81333	0.000137105	NA			ort010752	475.924	8.81116	2.45624	3.58725	0.00033418	0.306465			ort007745	767.514	9.20315	2.47967	3.71145	0.000206079	0.127212			ort011440	6598.8	10.2439	2.54758	4.02104	5.79e-05	0.0366411			ort001457	2569.73	-9.02979	2.34572	-3.84948	0.00011837	0.0772958			ort002306	2068.29	9.82447	2.50064	3.92878
ort008025	2240.2	13.0092	3.47134	3.74759	0.000178538	0.0328064			ort003930	463.626	8.77331	2.45643	3.57157	0.000354852	0.306465			ort007693	1896.65	7.84157	2.14064	3.6632	0.000249086	0.139783			ort003986	2454.03	11.2769	2.81914	4.00011	6.33e-05	0.0366411			ort009481	2501.95	-8.85336	2.32418	-3.80923	0.000139398	0.0827516			ort003444	3450.2	9.42471	2.40221	3.92334
ort001059	271.786	-13.0916	3.51438	-3.72515	0.000195199	NA			ort004534	570.049	-7.90712	2.21629	-3.56773	0.000360088	0.306465			ort010752	567.017	10.3526	2.87122	3.60566	0.000311362	0.154072			ort003388	1814.22	11.8412	3.04998	3.88239	0.000103434	0.0543218			ort004843	920.63	-9.87199	2.64078	-3.73828	0.000185283	0.093642			ort002548	2241.18	-9.67244	2.48253	-3.8962
ort009809	242.244	-12.9256	3.50985	-3.68265	0.000230818	NA			ort003444	1021.93	7.09906	2.0059	3.53909	0.00040151	0.31008			ort004843	809.544	-8.45021	2.35944	-3.58145	0.000341689	0.154072			ort005695	4284.85	9.6203	2.48886	3.86535	0.00011093	0.0543218			ort008775	1963.94	-8.64107	2.31462	-3.73326	0.000189016	0.093642			ort001702	1066.93	11.1923	2.94656	3.79844
ort005087	964.253	-9.6668	2.63149	-3.67351	0.000239243	NA			ort008779	716.055	7.39519	2.09851	3.52402	0.000425059	0.31008			ort005715	2450.69	7.36936	2.06101	3.5756	0.000349426	0.154072			ort002548	2024.09	9.99817	2.6097	3.83115	0.000127545	0.0579965			ort009178	867.641	-9.78638	2.63768	-3.71023	0.000207072	0.093642			ort009354	1230.05	-11.1299	2.93238	-3.79552
ort004214	388.646	-11.1643	3.05417	-3.65543	0.000256754	NA			ort007693	1323.83	6.63199	1.91528	3.46267	0.000534841	0.314002			ort011510	577.692	8.79246	2.47284	3.55561	0.000377109	0.155193			ort007963	5489.53	9.18861	2.42275	3.79264	0.000149052	0.0595461			ort001731	867.535	10.7327	2.90027	3.70058	0.000215104	0.093642			ort011192	1223.21	-11.1219	2.93201	-3.79326
ort000264	366.49	-11.0796	3.05059	-3.63194	0.000281294	NA			ort001056	440.605	-7.85724	2.2693	-3.4624	0.000535383	0.314002			ort009648	330.026	12.0155	3.45135	3.4814	0.000498791	0.173446			ort007693	2064.54	9.70448	2.55945	3.79163	0.00014966	0.0595461			ort000760	803.257	10.6216	2.89733	3.66598	0.000246395	0.0980838			ort011398	1892.66	-9.16482	2.42372	-3.7813
ort005771	299738	-9.11813	2.52188	-3.61561	0.000299639	0.0381581			ort008775	1002.7	-6.78887	1.96158	-3.46092	0.000538327	0.314002			ort008084	326.564	12.0003	3.45244	3.4759	0.000509149	0.173446			ort008775	1970.28	-9.60372	2.55053	-3.76539	0.000166292	0.0622713			ort005885	537.523	-12.5398	3.43752	-3.64793	0.000264361	0.0980838			ort000760	976.409	11.0644	2.94151	3.76146
ort005122	382.907	-10.1422	2.81603	-3.60161	0.000316254	NA			ort007608	392.032	-8.10473	2.34961	-3.4494	0.000561836	0.314002			ort008373	304.639	11.9001	3.46005	3.43927	0.000583282	0.173446			ort007169	2482.79	9.29198	2.47997	3.74681	0.000179097	0.0633407			ort009725	845.205	-9.16275	2.51575	-3.64215	0.000270369	0.0980838			ort001758	4132.76	-8.62742	2.29813	-3.7541
ort003286	379.953	-10.131	2.81549	-3.59832	0.000320282	NA			ort008384	342.489	9.33745	2.74481	3.40185	0.000669311	0.314002			ort001056	500.315	-8.75671	2.55295	-3.43003	0.000603511	0.173446			ort001758	1355.96	9.83508	2.64215	3.72238	0.000197357	0.0661249			ort001056	766.232	-9.02097	2.51044	-3.59338	0.000326416	0.112184			ort009481	2427.67	-8.64844	2.32937	-3.71277
ort003715	186.114	-12.5453	3.50159	-3.58275	0.000339992	NA			ort009648	240.744	11.2737	3.31709	3.39869	0.000677098	0.314002			ort008236	2285.69	6.82876	1.99182	3.42841	0.000607124	0.173446			ort006427	3996.49	8.89056	2.39728	3.70861	0.0002084	0.0663338			ort010783	1709.78	7.89903	2.22643	3.54785	0.000388394	0.11371			ort003408	1159.24	-9.04232	2.46826	-3.66344
ort009102	183.16	-12.5222	3.50119	-3.57656	0.000348141	NA			ort007501	462.165	-7.33853	2.16825	-3.38454	0.00071298	0.314002			ort008693	297.139	11.8641	3.46296	3.426	0.000612545	0.173446			ort002549	7897.3	8.60244	2.34054	3.67541	0.000237469	0.0719872			ort007745	435.23	12.181	3.43909	3.54193	0.000397215	0.11371			ort009178	874.597	-10.6376	2.91183	-3.65325
ort003308	316.268	-10.8669	3.04197	-3.57231	0.000353851	NA			ort001240	308.101	-9.34511	2.76603	-3.37853	0.000728739	0.314002			ort000872	1219	7.0549	2.07074	3.40695	0.000656933	0.173446			ort000100	3046.65	8.67915	2.38251	3.64285	0.000269632	0.0767945			ort003005	431.796	12.1696	3.43943	3.53826	0.000402774	0.11371			ort008775	1474.87	-8.58136	2.36309	-3.63141
ort004505	6183.5	-8.9841	2.51893	-3.56664	0.000361591	0.0381581			ort011520	228.92	11.2011	3.32386	3.3699	0.000751948	0.314002			ort010876	331.041	-11.6068	3.41187	-3.40189	0.000669212	0.173446			ort003247	1366.56	9.10833	2.51361	3.6236	0.000290532	0.0767945			ort008084	424.435	12.1448	3.44018	3.53028	0.000415124	0.11371			ort003005	421.871	12.297	3.471	3.54279
ort005969	19011.6	-8.95417	2.51146	-3.56532	0.000363411	0.0381581			ort000872	880.733	6.51678	1.94001	3.35914	0.000781849	0.314002			ort000378	2589.22	-6.65804	1.96425	-3.38961	0.000699922	0.173446			ort001102	1051.99	9.46843	2.61882	3.61554	0.000299726	0.0767945			ort008779	554.484	10.0864	2.88849	3.49194	0.000479521	0.11371			ort001343	996.643	-8.50113	2.40164	-3.53972
ort011644	827.052	-9.25214	2.59598	-3.56402	0.000365214	NA			ort002057	567.657	-6.89499	2.05685	-3.35221	0.00080169	0.314002			ort007692	608.85	7.64192	2.25811	3.38421	0.000713827	0.173446			ort003408	936.199	-9.85242	2.72801	-3.61158	0.000304335	0.0767945			ort008373	389.597	12.0212	3.44445	3.49002	0.000482983	0.11371			ort001457	1928.49	-7.96626	2.25205	-3.53734
ort002603	291.158	-10.7475	3.03739	-3.53838	0.00040259	NA			ort005091	221.825	11.1557	3.32831	3.35175	0.000803017	0.314002			ort008876	271.752	11.7352	3.47417	3.37786	0.000730536	0.173446			ort004851	903.302	9.834	2.72881	3.60376	0.000313644	0.0767945			ort004534	619.496	-8.71363	2.49978	-3.48576	0.000490747	0.11371			ort003247	989.351	-8.49051	2.40112	-3.53607
ort005085	544.418	-9.32707	2.63802	-3.53564	0.000406795	NA			ort004867	391.845	7.52614	2.25162	3.34255	0.000830124	0.314002			ort010890	261.367	11.679	3.47946	3.35656	0.000789183	0.176239			ort011192	613.006	12.7189	3.54701	3.5858	0.000336045	0.0792319			ort005091	382.728	11.9956	3.44546	3.48155	0.000498512	0.11371			ort010783	1625.2	7.88721	2.25076	3.50424
ort010844	326.777	-9.91332	2.80541	-3.53364	0.000409879	NA			ort003087	209.528	11.0734	3.33679	3.31857	0.000904797	0.32388			ort004534	530.933	-7.83947	2.34426	-3.34411	0.000825468	0.176239			ort011007	3184.67	8.32707	2.33349	3.5685	0.000359029	0.0813034			ort003408	988.79	-7.97087	2.28948	-3.48151	0.000498588	0.11371			ort008084	382.92	12.1572	3.47456	3.49893
ort010523	161.004	-12.3362	3.49861	-3.52604	0.000421823	NA			ort009092	442.024	-7.04989	2.13108	-3.30813	0.000939225	0.32388			ort002842	293.777	-11.4345	3.42452	-3.33902	0.000840751	0.176239			ort010783	1307.88	8.78132	2.46643	3.56034	0.000370374	0.0813034			ort010876	367.35	-11.9907	3.45286	-3.47268	0.000515288	0.11371			ort005091	380.177	12.1469	3.47487	3.49563
ort000717	5280.82	-8.77618	2.50314	-3.50606	0.000454785	0.0417834			ort006981	282.674	-8.21825	2.49029	-3.30011	0.000966465	0.32388			ort007933	342.576	9.62494	2.88703	3.33386	0.0008565	0.176239			ort004843	805.708	-9.63561	2.71735	-3.54596	0.00039118	0.0830085			ort007933	368.008	11.939	3.44782	3.46276	0.000534661	0.11371			ort004267	3372.57	-7.53359	2.16962	-3.47232
ort006160	365.351	-9.48883	2.71061	-3.50063	0.000464161	NA			ort010618	197.23	10.9861	3.34641	3.28295	0.00102725	0.32388			ort007386	334.931	8.59049	2.60865	3.29308	0.000990979	0.197333			ort001056	532.345	-12.4821	3.54309	-3.52295	0.000426773	0.0850337			ort011510	365.554	11.9293	3.44824	3.45954	0.0005411	0.11371			ort010876	396.011	-11.9381	3.44887	-3.46145
ort001118	147.71	-12.2119	3.49728	-3.49182	0.000479733	NA			ort004251	277.219	9.03189	2.7574	3.27551	0.0010547	0.32388			ort007536	394.649	7.8246	2.39356	3.26902	0.0010792	0.206695			ort003174	751.567	9.56838	2.71633	3.52254	0.000427439	0.0850337			ort008366	2510.87	7.35109	2.12975	3.45162	0.000557232	0.11371			ort010890	350.553	12.0298	3.47879	3.45805
ort010884	3490.49	-8.60025	2.49227	-3.45077	0.000559	0.0421094			ort008925	192.028	10.9476	3.35087	3.26707	0.00108665	0.32388			ort011317	10013.2	-5.95667	1.8282	-3.25822	0.00112115	0.206695			ort008366	5893.81	7.92089	2.26096	3.50332	0.000459489	0.0886395			ort009042	2012.23	7.35364	2.14063	3.43527	0.000591964	0.114791			ort009725	908.784	-8.10371	2.34949	-3.44914
ort010876	131.462	-12.0438	3.49644	-3.44459	0.000571932	NA			ort010890	188.244	10.9188	3.35428	3.2552	0.00113313	0.32388			ort011461	654.708	-6.96668	2.15007	-3.24021	0.00119443	0.206695			ort008579	775.328	9.02747	2.59431	3.47972	0.000501946	0.0887418			ort008693	341.511	11.8312	3.45288	3.42647	0.00061149	0.114791			ort007421	384.618	-11.896	3.44996	-3.44815
ort004006	128.508	-12.011	3.49639	-3.43526	0.000591991	NA			ort006760	735.057	6.25281	1.9244	3.24923	0.00115718	0.32388			ort001343	571.661	-7.13481	2.20345	-3.23801	0.00120366	0.206695			ort008990	1290.66	8.34601	2.4003	3.47707	0.00050692	0.0887418			ort000669	773.42	7.97724	2.33002	3.42368	0.000617785	0.114791			ort003245	647.84	-8.61696	2.5018	-3.4443
ort000351	121.122	-11.9256	3.49645	-3.41077	0.000647786	NA			ort005859	175.485	-10.9779	3.38224	-3.24575	0.0011714	0.32388			ort007608	342.45	-9.21065	2.8449	-3.2376	0.00120541	0.206695			ort001702	652.952	10.3662	2.98149	3.47687	0.000507312	0.0887418			ort007501	462.098	-9.87756	2.89316	-3.41411	0.000639917	0.114791			ort001056	645.106	-8.61084	2.50157	-3.44218
ort007588	116.691	-11.8718	3.49663	-3.39522	0.000685743	NA			ort005856	288.432	-7.66011	2.36039	-3.24528	0.00117336	0.32388			ort010618	205.978	11.3354	3.51747	3.22261	0.00127028	0.208907			ort000872	1268.41	8.32084	2.3983	3.46947	0.00052148	0.0887418			ort007386	470.087	9.84798	2.88825	3.40967	0.000650426	0.114791			ort011440	622.776	-8.55989	2.49968	-3.42439
ort005913	204.009	-10.2339	3.02025	-3.38844	0.000702908	NA			ort010850	170.728	-10.9383	3.38749	-3.22902	0.00124216	0.326403			ort004860	295.698	8.41025	2.61577	3.21521	0.0013035	0.208907			ort007256	1256.27	8.30693	2.3972	3.46526	0.000529718	0.0887418			ort003286	594.512	-8.23787	2.42351	-3.39915	0.000675949	0.116156			ort008373	311.054	11.8574	3.48611	3.40131
ort004729	18131.8	-8.28221	2.45743	-3.37027	0.000750933	0.0421094			ort004581	240.972	-8.98996	2.78496	-3.22804	0.00124642	0.326403			ort005091	277.378	9.31994	2.90193	3.21163	0.00131984	0.208907			ort009648	433.96	12.2205	3.54838	3.44397	0.000573239	0.0890227			ort010247	433.286	9.73024	2.88875	3.36832	0.000756278	0.126628			ort009276	9589.16	-7.01612	2.07834	-3.37583
ort010555	469.425	-8.62643	2.56624	-3.3615	0.000775192	NA			ort001606	1167.1	5.79743	1.80781	3.20687	0.00134185	0.341363			ort004581	319.052	-9.10837	2.84889	-3.19717	0.00138784	0.214178			ort000102	12411.9	7.60863	2.20964	3.44337	0.000574508	0.0890227			ort011671	422.001	9.69212	2.88911	3.35471	0.000794495	0.129701			ort004534	495.996	-8.81708	2.61586	-3.37062
ort008297	3907.63	-8.28067	2.46414	-3.36047	0.00077809	0.0421094			ort001653	321.092	-7.07436	2.21502	-3.19381	0.00140409	0.341363			ort007501	407.009	-7.45408	2.34225	-3.18245	0.00146036	0.219873			ort008534	629.168	9.31155	2.70609	3.44096	0.000579657	0.0890227			ort007421	402.996	-9.67991	2.89518	-3.34346	0.000827412	0.130438			ort004843	916.261	-7.6988	2.28484	-3.36952
ort006671	1377.93	-8.34268	2.48573	-3.35623	0.000790124	NA			ort003706	167.433	10.7498	3.37585	3.18434	0.00145086	0.341363			ort011520	187.515	11.2	3.53533	3.16801	0.00153485	NA			ort004534	615.902	-9.2475	2.70138	-3.42325	0.000618782	0.0890227			ort010890	286.555	11.5781	3.46787	3.33866	0.000841823	0.130438			ort010247	407.514	9.80283	2.91657	3.36108
ort008631	10089.4	-8.2364	2.45514	-3.35475	0.000794353	0.0421094			ort001303	165.541	10.7334	3.37808	3.17738	0.00148613	0.341363			ort003087	184.63	11.1776	3.53844	3.1589	0.00158365	NA			ort009504	573.544	10.179	2.97663	3.41964	0.000627034	0.0890227			ort011461	838.959	-7.40916	2.2291	-3.32383	0.000887905	0.130438			ort007745	396.542	9.76341	2.91675	3.34736
ort009554	605.826	-8.47947	2.53201	-3.34891	0.000811315	NA			ort010419	247.477	7.86476	2.48218	3.16849	0.00153231	0.341363			ort008509	582.025	6.67701	2.11398	3.1585	0.00158582	0.223676			ort001457	2068.3	-7.82128	2.28723	-3.41954	0.000627274	0.0890227			ort009648	276.742	11.5278	3.4714	3.32079	0.000897638	0.130438			ort005715	2782.5	7.01023	2.10343	3.33277
ort001128	101.92	-11.6766	3.49833	-3.33776	0.000844577	NA			ort007517	282.562	-7.21284	2.28025	-3.16318	0.00156054	0.341363			ort011232	207.117	-10.9303	3.47472	-3.14565	0.00165716	0.223676			ort003744	2199.92	7.79136	2.27906	3.41867	0.000629284	0.0890227			ort009385	385.673	-9.61644	2.89617	-3.3204	0.000898882	0.130438			ort009648	267.715	11.6409	3.49811	3.32777
ort005885	100.443	-11.6555	3.49862	-3.33147	0.000863902	NA			ort003666	501.074	6.28536	1.98858	3.16073	0.00157373	0.341363			ort007463	262.81	8.23962	2.62428	3.13976	0.00169086	0.223676			ort003005	398.05	12.0959	3.55064	3.40668	0.000657581	0.0910035			ort004107	460.311	8.2295	2.48753	3.3083	0.000938652	0.133248			ort008693	267.167	11.6379	3.4983	3.32674
ort007870	1505.22	8.99011	2.70986	3.31755	0.000908101	NA			ort006083	297.25	7.12504	2.25771	3.15586	0.00160023	0.341363			ort009092	451.926	-7.01727	2.23512	-3.13955	0.00169209	0.223676			ort007463	384.393	12.0455	3.5518	3.39139	0.000695388	0.0941881			ort010523	257.807	-11.4798	3.48433	-3.2947	0.000985265	0.136889			ort007501	428.003	-9.6057	2.89037	-3.32335
ort010009	9547.04	-8.10586	2.44448	-3.31599	0.000913188	0.0421094			ort008876	228.029	8.74949	2.77429	3.15378	0.00161173	0.341363			ort005856	342.737	-7.62206	2.42878	-3.13823	0.00169974	0.223676			ort008084	355.058	11.931	3.55497	3.35615	0.000790365	0.098074			ort007963	1801.37	6.8208	2.07641	3.28491	0.00102016	0.137008			ort000804	259.486	11.5959	3.50103	3.31213
ort002879	3833.48	-8.1221	2.45081	-3.31405	0.000919566	0.0421094			ort001343	325.794	-6.83035	2.16899	-3.14909	0.00163779	0.341363			ort000629	245.068	9.14097	2.91331	3.13766	0.00170302	0.223676			ort010875	829.917	8.12324	2.42042	3.35613	0.000790423	0.098074			ort009874	428.433	-8.18008	2.49303	-3.28118	0.00103375	0.137008			ort003212	856.656	-7.43043	2.25211	-3.29932
ort000522	94.5343	-11.5681	3.50003	-3.30513	0.00094931	NA			ort009904	156.082	10.6485	3.39006	3.14111	0.00168311	0.343791			ort007517	301.43	-8.0235	2.56664	-3.12608	0.00177156	0.22783			ort011510	354.047	11.9269	3.5551	3.35487	0.000794028	0.098074			ort000872	1450.4	6.87788	2.09882	3.27703	0.00104906	0.137008			ort004503	1218.68	-7.1068	2.16729	-3.27912
ort004581	459.254	-8.40157	2.54218	-3.30487	0.000950206	NA			ort007692	495.983	6.04492	1.95499	3.09204	0.00198786	0.393633			ort009504	169.629	11.0553	3.55632	3.10864	0.0018795	NA			ort007718	1122.72	7.82104	2.33503	3.34944	0.000809738	0.098074			ort005856	420.791	-8.15402	2.49296	-3.27082	0.00107235	0.137303			ort005695	1233.81	-7.03662	2.15614	-3.26353
ort010243	167.081	-9.94559	3.01309	-3.3008	0.000964105	NA			ort003841	135.842	-10.6085	3.43714	-3.08643	0.00202576	0.393633			ort003930	249.54	8.16462	2.6286	3.10607	0.00189592	0.238848			ort007386	480.986	9.92486	2.97198	3.33947	0.00083937	0.098074			ort002769	1470.56	6.78148	2.08433	3.25356	0.00113969	0.143119			ort002842	259.298	-11.3272	3.47545	-3.2592
ort010288	331491	-8.03081	2.43506	-3.29799	0.000973801	0.0421094			ort008320	135.314	-10.6029	3.43809	-3.08395	0.00204274	0.393633			ort003706	155.782	10.9325	3.57582	3.05734	0.00223313	NA			ort008779	474.917	9.90653	2.97174	3.33358	0.000857373	0.098074			ort009697	1228.56	6.83064	2.10541	3.24432	0.0011773	0.143553			ort011581	450.063	-8.08984	2.48646	-3.25356
ort002615	392.616	-8.36794	2.55091	-3.28037	0.0010367	NA			ort004860	201.07	8.56752	2.78759	3.07345	0.002116	0.400199			ort010850	174.62	-10.684	3.50729	-3.04624	0.00231726	NA			ort008373	336.344	11.8529	3.55759	3.33172	0.0008631	0.098074			ort008424	1556.47	-6.71056	2.06991	-3.24196	0.00118712	0.143553			ort007253	391.639	-8.47543	2.61177	-3.24509
ort007825	690.697	-8.18228	2.4944	-3.28026	0.0010371	NA			ort000508	267.707	-6.80989	2.22282	-3.06363	0.00218671	0.406052			ort000751	145.973	10.8387	3.59167	3.01772	0.00254682	NA			ort005885	339.574	-11.8335	3.55383	-3.32978	0.000869131	0.098074			ort009504	334.17	9.355	2.89545	3.23093	0.00123386	0.145506			ort008424	1466.33	-6.84809	2.11613	-3.23614
ort010554	15515.2	-7.93128	2.42863	-3.26574	0.00109179	0.0421094			ort000804	132.906	10.4166	3.42652	3.04001	0.00236574	0.431452			ort007421	231.959	-8.64747	2.87448	-3.00836	0.00262664	0.318037			ort005091	334.827	11.8464	3.55782	3.32967	0.000869491	0.098074			ort011456	2886.37	6.47446	2.00652	3.2267	0.00125225	0.145506			ort011461	638.642	-7.36893	2.2845	-3.22561
ort003280	1775.03	-7.9931	2.44892	-3.26393	0.00109878	0.0421094			ort009961	842.792	-5.33766	1.76927	-3.01688	0.00255392	0.457601			ort011589	281.996	7.01301	2.34426	2.99157	0.00277549	0.318037			ort000760	332.804	11.8376	3.55814	3.32691	0.000878137	0.098074			ort007070	222.142	-11.265	3.50353	-3.21534	0.00130291	0.145506			ort003242	352.811	-9.32658	2.89161	-3.2254
ort001219	45772.8	-7.87636	2.42264	-3.25114	0.00114942	0.0421094			ort007386	264.198	6.62885	2.20289	3.00916	0.0026197	0.461293			ort000508	329.159	-6.82139	2.28372	-2.98697	0.00281759	0.318037			ort008513	6737.4	7.12433	2.15323	3.30867	0.000937409	0.102889			ort003212	806.294	-6.97036	2.16896	-3.21369	0.00131041	0.145506			ort011671	309.316	9.40455	2.92182	3.21873
ort009471	11157.8	-7.8834	2.42521	-3.25061	0.00115158	0.0421094			ort002208	117.871	-10.4038	3.47379	-2.99494	0.00274501	0.461397			ort006981	239.902	-7.6927	2.58252	-2.97875	0.00289424	0.318037			ort009354	452.777	-9.80434	2.96756	-3.30383	0.000953723	0.102905			ort008876	319.449	9.28991	2.89737	3.20632	0.00134442	0.145506			ort007608	238.791	-11.2083	3.48362	-3.21744
ort010901	66803.6	-7.8199	2.41772	-3.23441	0.00121896	0.0421094			ort009919	166.972	-8.45945	2.82876	-2.99051	0.00278508	0.461397			ort005947	136.165	10.7383	3.60983	2.97474	0.00293239	NA			ort008693	307.515	11.7236	3.56276	3.2906	0.000999726	0.106071			ort009276	6431.86	-6.2847	1.96022	-3.20612	0.00134536	0.145506			ort008876	325.681	8.47703	2.64238	3.2081
ort002296	5827.94	-7.80764	2.42114	-3.22478	0.0012607	0.0421094			ort001457	1977.75	-4.89461	1.63724	-2.98955	0.00279386	0.461397			ort010096	135.011	10.726	3.61213	2.96944	0.00298339	NA			ort009092	505.688	-8.37614	2.5648	-3.26581	0.00109153	0.113913			ort003079	315.033	9.26979	2.89801	3.19867	0.00138062	0.145506			ort000872	1341	6.75471	2.106	3.20737
ort005047	3274.34	-7.82393	2.42634	-3.22457	0.0012616	0.0421094			ort008827	1345.58	5.02219	1.68035	2.98877	0.002801	0.461397			ort001492	202.806	7.86429	2.64962	2.96808	0.00299662	0.318037			ort008876	282.732	11.6024	3.5686	3.25124	0.00114901	0.116266			ort000274	744.664	-6.97113	2.17951	-3.19848	0.00138153	0.145506			ort006981	340.507	-9.27529	2.89224	-3.20696
ort010757	36511.6	-7.71046	2.40886	-3.20087	0.00137011	0.0421094			ort009462	115.228	-10.3711	3.48009	-2.98011	0.00288143	0.464231			ort002057	598.229	-5.90663	1.99426	-2.96182	0.00305828	0.318037			ort007745	426.35	8.74907	2.69132	3.25085	0.00115061	0.116266			ort009701	462.802	7.49717	2.35038	3.18977	0.00142386	0.147584			ort004044	363.385	-8.36709	2.61156	-3.20387
ort004029	11548.1	-7.71133	2.41056	-3.19898	0.00137913	0.0421094			ort001492	208.749	7.02946	2.36448	2.97294	0.0029496	0.464231			ort010419	269.88	6.94915	2.3465	2.9615	0.00306147	0.318037			ort010247	387.417	9.6124	2.96974	3.23678	0.00120886	0.120244			ort001653	320.438	-8.34655	2.62427	-3.18053	0.00147007	0.149558			ort007933	361.795	8.04238	2.51406	3.19896
ort009725	427.097	-7.97345	2.49981	-3.18963	0.00142457	NA			ort004280	119.663	10.2652	3.45348	2.97243	0.00295457	0.464231			ort006534	2448.34	-5.15302	1.74211	-2.95792	0.00309724	0.318037			ort009874	259.994	-11.4483	3.57208	-3.20493	0.00135095	0.130722			ort007253	296.001	-9.23411	2.90666	-3.17688	0.00148871	0.149558			ort007074	774.359	-6.99226	2.19762	-3.18175
ort007084	4948.51	-7.68893	2.41179	-3.18806	0.00143229	0.0421094			ort010555	193.818	-7.0831	2.39166	-2.96158	0.00306066	0.471448			ort011398	259.977	-7.22101	2.44177	-2.95729	0.00310356	0.318037			ort005012	22750.9	6.64936	2.07699	3.20145	0.00136739	0.130722			ort001240	311.267	-8.30452	2.62533	-3.16324	0.00156026	0.154371			ort009874	390.365	-7.88373	2.48339	-3.17459
ort002658	216.333	-8.31527	2.61329	-3.18192	0.00146302	NA			ort001760	394.008	-5.7691	1.95154	-2.95617	0.00311481	0.471448			ort010555	212.027	-8.51751	2.88415	-2.95321	0.00314484	0.318037			ort007536	492.585	7.95497	2.48618	3.19968	0.00137581	0.130722			ort003835	309.164	8.24026	2.6195	3.14573	0.00165671	0.16083			ort002769	1133.91	6.68195	2.10824	3.16945
ort006207	70.9007	-11.153	3.51232	-3.1754	0.00149629	NA			ort006756	558.025	5.42587	1.83771	2.95251	0.00315197	0.471448			ort009483	211.16	-8.51158	2.88462	-2.95068	0.00317074	0.318037			ort006981	254.557	-11.4178	3.57396	-3.19471	0.00139971	0.131038			ort008360	3627.98	6.13353	1.95176	3.14256	0.0016748	0.16083			ort005061	210.993	-11.0298	3.49798	-3.15318
ort005715	883.274	9.22147	2.90793	3.17115	0.00151839	NA			ort011267	114.46	10.2011	3.4657	2.94345	0.00324581	0.471448			ort001653	283.952	-6.93111	2.35099	-2.94816	0.00319672	0.318037			ort000329	1264.6	-7.02889	2.20632	-3.18579	0.00144358	0.131868			ort003086	1556.16	6.31062	2.01389	3.13355	0.00172707	0.163446			ort005856	372.592	-7.81621	2.48279	-3.14815
ort006107	15029	-7.61381	2.4017	-3.17018	0.00152344	0.0430666			ort007785	873.415	5.06286	1.72388	2.9369	0.00331512	0.471448			ort010846	148.188	-10.4473	3.54421	-2.9477	0.00320148	NA			ort007501	248.131	-11.3809	3.57633	-3.18228	0.00146122	0.131868			ort008509	776.533	6.65257	2.12738	3.12712	0.00176529	0.164676			ort007517	366.668	-7.79299	2.48264	-3.139
ort005534	397.555	-7.86961	2.49345	-3.15611	0.00159888	NA			ort000932	276.526	-6.17151	2.10222	-2.93571	0.00332786	0.471448			ort006684	515.965	5.94655	2.01953	2.94452	0.00323456	0.318037			ort001731	345.437	9.44671	2.97029	3.1804	0.00147073	0.131868			ort010555	290.378	-8.20397	2.62828	-3.12142	0.00179981	0.165532			ort008827	5488.19	6.1697	1.97135	3.12969
ort001971	67.9465	-11.0916	3.51502	-3.15549	0.00160228	NA			ort007421	153.758	-8.34015	2.84147	-2.93515	0.00333385	0.471448			ort009919	254.344	-7.18919	2.4432	-2.94253	0.00325538	0.318037			ort009919	242.694	-11.3489	3.57847	-3.17144	0.00151684	0.134114			ort003706	189.401	10.9807	3.52321	3.11667	0.00182905	0.165884			ort003286	311.89	-8.14591	2.61291	-3.11756
ort000147	168.897	-8.37337	2.66467	-3.14236	0.00167591	NA			ort005947	111.622	10.1649	3.47281	2.92698	0.00342267	0.471448			ort009904	128.664	10.6566	3.62548	2.93935	0.00328896	NA			ort010523	233.797	-11.295	3.58214	-3.15315	0.00161519	0.139189			ort011520	184.494	10.9428	3.52779	3.10189	0.00192289	0.172006			ort011510	277.953	8.24772	2.64644	3.11653
ort001034	2466.66	-7.53789	2.40392	-3.13566	0.00171469	0.0452235			ort002877	1352.34	4.82822	1.64956	2.92698	0.0034227	0.471448			ort001339	735.867	-5.64428	1.92076	-2.93857	0.00329732	0.318037			ort011520	230.636	11.3086	3.58701	3.15265	0.00161797	0.139189			ort006684	712.254	6.52662	2.11955	3.07925	0.0020752	0.180956			ort003930	175.551	11.0321	3.55134	3.10646
ort006194	746.704	-7.64044	2.43777	-3.13419	0.00172332	NA			ort004503	903.273	-4.99668	1.70919	-2.92342	0.00346212	0.471448			ort008085	192.997	7.79246	2.65557	2.93438	0.00334214	NA			ort010876	354.92	-8.45056	2.68482	-3.14754	0.00164653	0.139758			ort011589	176.153	10.8761	3.53621	3.07563	0.00210058	0.180956			ort007386	338.661	7.52969	2.43289	3.09496
ort008780	50768.1	-7.46679	2.38787	-3.12696	0.00176623	0.0452235			ort007575	109.257	10.134	3.47901	2.91289	0.003581	0.48122			ort008508	683.584	-5.65853	1.93335	-2.9268	0.00342468	0.323656			ort009214	4351.09	6.44339	2.06583	3.11904	0.0018144	0.15198			ort006981	365.727	-7.21008	2.35389	-3.06304	0.00219097	0.180956			ort003087	171.162	10.9956	3.55557	3.09249
ort007116	339.779	-7.79473	2.49699	-3.12166	0.00179836	NA			ort009874	159.517	-7.38908	2.549	-2.89882	0.00374572	0.49517			ort006240	545.536	5.81322	1.9884	2.92357	0.00346044	0.323656			ort007421	295.1	-9.18589	2.96964	-3.09327	0.00197966	0.163669			ort003087	171.737	10.8394	3.54102	3.06111	0.0022052	0.180956			ort010618	167.322	10.9628	3.55947	3.07991
ort000972	7664.35	-7.43596	2.38799	-3.1139	0.0018463	0.0452235			ort009725	810.522	-4.9696	1.71613	-2.89581	0.00378177	0.49517			ort009462	140.822	-10.3737	3.55693	-2.91647	0.00354011	NA			ort006760	300.411	8.24257	2.68918	3.06509	0.00217605	0.17424			ort006760	371.536	7.17832	2.34712	3.05836	0.00222555	0.180956			ort009174	178.182	-10.7859	3.522	-3.06244
ort001425	243.26	-7.89804	2.54163	-3.10748	0.00188692	NA			ort000751	104.527	10.0701	3.49219	2.88361	0.00393141	0.504921			ort008827	1470.03	5.14893	1.76946	2.90989	0.00361554	0.333116			ort007517	343.068	-7.81433	2.55316	-3.06065	0.00220859	0.17424			ort007693	2680.24	5.89398	1.9273	3.05815	0.00222705	0.180956			ort006240	775.596	6.46884	2.11294	3.06153
ort002299	1231.45	-7.46313	2.40746	-3.1	0.0019352	NA			ort009130	489.388	5.29481	1.83801	2.88073	0.0039676	0.504921			ort003724	168.331	8.59793	2.96115	2.90358	0.00368927	NA			ort010000	693.288	6.85651	2.24055	3.06019	0.00221193	0.17424			ort009904	170.265	10.827	3.54268	3.05617	0.00224187	0.180956			ort011520	157.447	10.8751	3.57045	3.04586
ort011098	8538.18	-7.38497	2.38321	-3.09875	0.00194337	0.0452235			ort011483	221.157	6.36946	2.21331	2.8778	0.00400456	0.504921			ort005885	135.623	-10.3194	3.56671	-2.89326	0.00381262	NA			ort011232	194.254	-11.0277	3.60441	-3.05951	0.00221701	0.17424			ort008827	4187.71	5.7992	1.9003	3.05173	0.00227528	0.180956			ort008085	246.683	8.07494	2.6515	3.04542
ort001731	342.225	10.2986	3.32742	3.09507	0.00196766	NA			ort007536	234.929	6.19132	2.16077	2.86533	0.00416573	0.505366			ort005061	132.156	-10.2821	3.57363	-2.87721	0.00401214	NA			ort011461	459.26	-7.23199	2.37124	-3.04988	0.00228936	0.175867			ort002842	164.059	-10.8277	3.55549	-3.04536	0.00232403	0.180956			ort008445	525.812	-6.72099	2.2112	-3.03953
ort011472	1637.24	-7.42401	2.39886	-3.0948	0.00196945	0.0452235			ort002254	490.39	5.23484	1.82804	2.86364	0.00418804	0.505366			ort004280	116.548	10.5139	3.65469	2.87682	0.00401705	NA			ort008509	751.429	6.74935	2.21348	3.04921	0.00229447	0.175867			ort009919	234.861	-8.8997	2.92298	-3.04473	0.0023289	0.180956			ort007693	2630.29	5.87045	1.94607	3.01656
ort010957	320.576	-7.71042	2.49218	-3.09385	0.00197577	NA			ort006059	250.593	6.0602	2.11747	2.862	0.0042098	0.505366			ort005282	324.68	-6.31085	2.19416	-2.8762	0.00402491	0.365379			ort003706	186.633	11.0032	3.61354	3.04498	0.00232694	0.175867			ort005947	165.358	10.7848	3.54845	3.03931	0.00237119	0.180956			ort008509	597.674	6.43353	2.13979	3.00662
ort006347	11778.7	-7.36015	2.38025	-3.09217	0.00198697	0.0452235			ort003823	159.504	7.22764	2.52981	2.85699	0.00427678	0.505366			ort001760	570.495	-5.59806	1.95129	-2.86891	0.00411893	0.368495			ort011402	288.272	8.18286	2.68974	3.04225	0.0023482	0.175867			ort007256	392.654	6.99369	2.30126	3.03907	0.00237308	0.180956			ort003706	145.927	10.7655	3.58526	3.0027
ort005030	1282.18	-7.41924	2.40261	-3.088	0.00201512	NA			ort011538	990.878	4.73163	1.65885	2.85235	0.00433979	0.505366			ort003841	129.556	-10.2534	3.57905	-2.86484	0.00417223	NA			ort010555	264.454	-9.02742	2.97322	-3.03624	0.0023955	0.176262			ort004267	3950.97	-5.75888	1.89575	-3.03779	0.00238319	0.180956			ort009904	140.441	10.7102	3.59321	2.98067
ort009874	151.172	-8.21291	2.66041	-3.08708	0.00202134	NA			ort011461	401.658	-5.37364	1.88443	-2.8516	0.00434994	0.505366			ort004057	127.39	-10.2291	3.58354	-2.85446	0.00431102	NA			ort007692	694.793	6.74316	2.22212	3.03456	0.00240886	0.176262			ort007169	420.642	6.86963	2.2646	3.03349	0.00241743	0.181322			ort009997	441.869	-6.6392	2.22887	-2.97874
ort001341	333.593	10.2618	3.32576	3.08554	0.00203182	NA			ort001596	99.3246	9.99647	3.50804	2.84959	0.00437759	0.505366			ort007070	196.572	-7.40378	2.60216	-2.84524	0.00443779	NA			ort007608	181.897	-10.9329	3.61377	-3.02534	0.00248351	0.179659			ort000804	321.959	7.29438	2.40754	3.02981	0.0024471	0.181322			ort005859	151.751	-10.5543	3.55	-2.97303
ort000526	7263.09	-7.34126	2.37988	-3.08472	0.00203746	0.0452235			ort006589	98.3787	9.98266	3.51109	2.84318	0.00446657	0.505366			ort003074	110.778	10.4406	3.6705	2.84447	0.00444859	NA			ort005856	354.943	-7.44654	2.46965	-3.01522	0.00256793	0.183679			ort009092	577.529	-6.48439	2.1423	-3.02683	0.00247131	0.181322			ort009919	243.534	-7.78757	2.62076	-2.97149
ort002634	3562.61	-7.3301	2.38236	-3.07683	0.00209216	0.0452235			ort008085	316.614	5.61224	1.97813	2.83715	0.0045518	0.505366			ort001989	662.06	-5.37498	1.89129	-2.84197	0.00448362	0.371991			ort003079	172.471	10.8893	3.62551	3.00353	0.00266869	0.184532			ort005715	2389.72	5.75969	1.91209	3.01224	0.00259326	0.188156			ort000625	466.57	-6.5468	2.20341	-2.97121
ort001240	146.74	-8.16984	2.65925	-3.07223	0.00212466	NA			ort009884	7585.56	4.23645	1.4945	2.83469	0.00458703	0.505366			ort009961	818.618	-5.22287	1.83814	-2.84139	0.00449176	0.371991			ort010890	171.965	10.8851	3.62598	3.00197	0.00268237	0.184532			ort006240	394.145	6.77493	2.26312	2.99362	0.00275691	0.197831			ort000932	583.147	-6.33565	2.13328	-2.96992
ort008838	2150.73	-7.32052	2.38593	-3.0682	0.0021535	0.0452235			ort009276	96.9598	9.9617	3.51577	2.83344	0.00460504	0.505366			ort006760	506.015	5.57467	1.96251	2.84058	0.00450323	0.371991			ort008424	1116.9	-6.33601	2.11081	-3.0017	0.00268473	0.184532			ort001606	3800.9	-5.55802	1.86713	-2.97677	0.00291306	0.206764			ort003027	150.839	-10.5456	3.55115	-2.96962
ort000760	307.698	10.1452	3.32059	3.05523	0.00224885	NA			ort004020	292.689	-5.66014	2.00172	-2.82763	0.00468939	0.505366			ort011183	975.753	-5.09727	1.79782	-2.83525	0.00457894	0.371991			ort002842	173.494	-10.8647	3.62101	-3.00045	0.0026958	0.184532			ort008249	661.483	-6.12826	2.06772	-2.96378	0.00303887	0.213374			ort001240	451.531	-6.49902	2.20147	-2.95214
ort007295	1523.67	-7.29397	2.38809	-3.05432	0.00225572	NA			ort000888	4855.42	4.25554	1.50509	2.82744	0.00469216	0.505366			ort001100	122.624	-10.1741	3.59442	-2.83051	0.00464734	NA			ort007226	1420.81	6.22194	2.07607	2.99697	0.00272675	0.184665			ort006851	142.296	10.5681	3.58107	2.95111	0.00316633	0.219959			ort009664	805.913	-6.03942	2.04711	-2.95022
ort009767	1058.29	-7.31579	2.39698	-3.05208	0.00227258	NA			ort000121	96.0138	9.94756	3.51896	2.82685	0.00470085	0.505366			ort006059	256.899	6.38711	2.26006	2.82607	0.00471224	0.371991			ort007908	165.896	10.8333	3.63167	2.983	0.00285439	0.191274			ort007791	279.761	7.09031	2.41125	2.94052	0.00327664	0.225226			ort000372	346.063	6.74796	2.28855	2.94858
ort006039	115.552	-8.41084	2.76033	-3.04705	0.00231101	NA			ort005224	449.186	5.16785	1.83238	2.82029	0.00479802	0.508799			ort010523	121.757	-10.1638	3.59648	-2.82604	0.00471267	NA			ort001339	500.814	-6.76839	2.27539	-2.9746	0.00293368	0.192671			ort003740	382.878	6.53812	2.22986	2.93207	0.0033671	0.225701			ort005030	585.063	-6.23216	2.11636	-2.94475
ort004714	436.806	-7.41824	2.43956	-3.04081	0.00235943	NA			ort009174	90.3854	-10.0207	3.55597	-2.818	0.00483242	0.508799			ort007253	172.163	-8.21613	2.91115	-2.8223	0.00476809	NA			ort005715	1916.24	6.04091	2.03225	2.97253	0.00295357	0.192671			ort007625	813.145	-5.86254	2.00208	-2.92823	0.00340899	0.225701			ort002207	706.746	-6.06182	2.06513	-2.93531
ort000473	5668.95	-7.20161	2.36847	-3.04062	0.00236095	0.0472067			ort001100	141.545	-7.21554	2.56772	-2.8101	0.00495265	0.512618			ort008925	271.18	6.27109	2.22316	2.8208	0.00479039	0.371991			ort001005	1000.64	6.26419	2.10828	2.97124	0.00296603	0.192671			ort002875	1436.7	-5.60365	1.91466	-2.92671	0.0034257	0.225701			ort003086	1445.56	5.72149	1.95046	2.9334
ort004504	182.529	-7.74604	2.55866	-3.02738	0.00246684	NA			ort002769	511.479	5.01648	1.78584	2.80903	0.00496908	0.512618			ort002877	1756.66	4.784	1.6977	2.81793	0.00483342	0.371991			ort008236	1068.89	6.201	2.09292	2.96285	0.00304802	0.195997			ort010618	135.917	10.502	3.59208	2.92364	0.00345962	0.225701			ort010752	612.663	6.12429	2.08856	2.93231
ort010783	613.657	8.69498	2.87579	3.02351	0.00249864	NA			ort001307	2003.26	-4.33463	1.54647	-2.80292	0.00506423	0.51721			ort007860	211.448	-6.92071	2.45785	-2.81576	0.00486618	0.371991			ort001100	160.148	-10.7492	3.63411	-2.95786	0.00309784	0.197209			ort008508	785.141	-5.86448	2.00625	-2.92311	0.00346557	0.225701			ort009019	752.046	-6.00622	2.04938	-2.93075
ort007688	7719.5	-7.12684	2.36074	-3.0189	0.00253697	0.0472067			ort009483	153.647	-6.74523	2.42073	-2.78645	0.00532889	0.538851			ort004867	355.709	5.84893	2.07958	2.81256	0.0049149	0.371991			ort001653	281.283	-7.52645	2.55266	-2.94847	0.00319351	0.19987			ort009309	889.199	5.78914	1.98202	2.92084	0.00349094	0.225701			ort005947	127.274	10.5682	3.61508	2.92335
ort002457	6623.09	-7.12675	2.36122	-3.01824	0.00254244	0.0472067			ort011144	128.705	7.92175	2.85531	2.77439	0.00553047	0.544044			ort004798	11575.7	-4.48608	1.59511	-2.81239	0.00491748	0.371991			ort011671	221.015	8.80127	2.9859	2.94761	0.00320244	0.19987			ort004020	479.195	-6.2118	2.13059	-2.91553	0.00355082	0.227322			ort009504	182.041	8.63825	2.95754	2.92075
ort006891	1478.39	-7.17567	2.37777	-3.01781	0.00254609	NA			ort008484	88.4462	9.82911	3.54673	2.77132	0.00558301	0.544044			ort002875	864.11	-5.08018	1.80805	-2.80976	0.00495781	0.371991			ort009697	542.565	6.49939	2.21674	2.93195	0.00336836	0.208183			ort011508	212.501	7.69718	2.64314	2.91214	0.00358965	0.227577			ort004581	223.483	-7.66302	2.62531	-2.91891
ort002384	146157	-7.10904	2.35638	-3.01693	0.00255346	0.0472067			ort001989	582.208	-4.78796	1.72787	-2.77103	0.00558801	0.544044			ort004503	1144.29	-4.92979	1.75464	-2.80958	0.00496062	0.371991			ort007103	236.177	7.8942	2.69523	2.92895	0.00340104	0.208183			ort001989	805.484	-5.79713	1.99308	-2.90862	0.00363024	0.227937			ort003835	442.7	6.32109	2.16882	2.91452
ort006596	414.649	-7.34269	2.43459	-3.01599	0.00256146	NA			ort011510	142.004	7.0588	2.54764	2.77072	0.00559333	0.544044			ort000932	368.585	-5.83475	2.07808	-2.80777	0.00498862	0.371991			ort009904	148.7	10.6754	3.65123	2.92378	0.00345815	NA			ort007463	410.394	6.31374	2.1779	2.89901	0.00374349	0.232809			ort001992	417.809	-6.38575	2.19718	-2.90635
ort010270	3414.14	-7.12986	2.36473	-3.01509	0.00256907	0.0472067			ort011671	125.867	7.88945	2.8596	2.75893	0.00579905	0.549989			ort008424	1262.15	-4.87686	1.73744	-2.80693	0.00500166	0.371991			ort003087	147.688	10.6655	3.65253	2.92004	0.0034999	NA			ort007608	181.363	-8.52588	2.95036	-2.88978	0.00385514	0.235805			ort003244	246.817	-7.2188	2.4876	-2.90191
ort010507	271.832	-7.47123	2.479	-3.01381	0.00257993	NA			ort003769	7678.31	4.02077	1.4578	2.7581	0.00581385	0.549989			ort001303	104.431	10.3555	3.68998	2.80638	0.00501012	NA			ort010618	147.688	10.6655	3.65253	2.92004	0.0034999	NA			ort007517	349.367	-6.4594	2.23581	-2.88907	0.00386389	0.235805			ort008513	410.518	-6.36005	2.19627	-2.89584
ort010154	1291.09	-7.15909	2.37847	-3.00995	0.00261287	NA			ort005727	856.081	4.51209	1.6369	2.75649	0.0058425	0.549989			ort000015	115.258	-10.0847	3.61287	-2.79132	0.00524933	NA			ort008223	446.443	-6.60098	2.26708	-2.91167	0.00359504	0.217962			ort001339	868.058	-5.6733	1.96617	-2.88545	0.00390851	0.23632			ort011508	171.069	8.54833	2.96435	2.88371
ort003841	50.2213	-10.6555	3.54213	-3.00823	0.00262776	NA			ort002493	2803.19	4.12752	1.49821	2.75496	0.00586986	0.549989			ort011267	100.97	10.3069	3.70154	2.78448	0.00536132	NA			ort003244	309.986	6.95913	2.40932	2.88842	0.00387182	0.232529			ort001100	124.318	-10.4276	3.62054	-2.88012	0.00397528	NA			ort002208	128.965	-10.3196	3.58397	-2.87936
ort006513	88.7951	-9.03231	3.0075	-3.00326	0.002671	NA			ort004057	117.287	-7.94814	2.89166	-2.74864	0.00598427	0.555612			ort001535	192.133	6.77942	2.43602	2.78299	0.00538601	NA			ort003823	139.09	10.579	3.6642	2.88712	0.00388787	NA			ort001760	684.807	-5.77673	2.00893	-2.87553	0.00403346	0.241637			ort004834	208.9	-7.56518	2.62959	-2.87695
ort007119	3355.4	-7.08446	2.36085	-3.00081	0.00269258	0.0482695			ort002430	13255.7	-3.94566	1.43935	-2.74127	0.0061202	0.563113			ort009874	220.691	-6.56409	2.36632	-2.77396	0.00553781	0.406963			ort001240	423.212	-6.52307	2.26353	-2.88181	0.00395394	0.235241			ort008236	909.43	5.56198	1.94478	2.85995	0.00423709	0.251529			ort000952	551.07	-5.94906	2.07964	-2.86063
ort002896	48.7442	-10.6125	3.54549	-2.99323	0.00276045	NA			ort001636	333.919	5.17636	1.89321	2.73417	0.00625375	0.564314			ort003823	151.455	7.44099	2.6903	2.76585	0.0056774	NA			ort008455	129.986	10.4813	3.67862	2.84925	0.00438219	NA			ort005061	170.154	-8.43359	2.95876	-2.85037	0.00436677	0.255958			ort009013	1374.05	5.45951	1.91325	2.85353
ort004534	236.213	-7.43834	2.48855	-2.98903	0.00279869	NA			ort007463	151.046	6.55845	2.4025	2.72985	0.00633639	0.564314			ort009276	98.0847	10.2651	3.71154	2.76571	0.00567982	NA			ort009276	129.48	10.4757	3.67948	2.84706	0.00441252	NA			ort009961	1037.99	-5.45968	1.91657	-2.84868	0.0043901	0.255958			ort005075	227.296	6.95059	2.44078	2.8477
ort010816	1361.53	-7.08044	2.37022	-2.98725	0.00281503	NA			ort009013	830.595	4.44453	1.62872	2.72884	0.0063557	0.564314			ort007785	1604.78	4.63804	1.67844	2.7633	0.00572207	0.413789			ort007625	587.406	-6.07284	2.13552	-2.84373	0.00445893	0.262829			ort011135	117.185	-10.3423	3.63691	-2.84372	0.00445909	NA			ort010875	1016.3	-5.50183	1.94217	-2.83283
ort005871	7445.82	-7.0086	2.35036	-2.98193	0.00286436	0.0488686			ort004777	638.346	4.59455	1.68448	2.72758	0.00638004	0.564314			ort004020	376.671	-5.6211	2.03599	-2.76087	0.00576476	0.413789			ort001989	535.978	-6.12194	2.15648	-2.83885	0.0045276	0.264429			ort002383	574.302	-5.70597	2.02153	-2.8226	0.00476357	0.273702			ort002057	950.854	-5.51864	1.9503	-2.82963
ort007745	250.999	9.85135	3.3084	2.97768	0.00290441	NA			ort003998	82.7705	9.73343	3.57051	2.72606	0.00640952	0.564314			ort009923	676.522	5.04184	1.82929	2.75618	0.00584803	0.414839			ort001343	431.637	-6.25889	2.2145	-2.82633	0.00470852	0.272495			ort007103	184.532	7.49254	2.65738	2.81952	0.00480954	0.273702			ort004020	456.46	-5.97732	2.11361	-2.82802
ort007517	252.63	-7.36493	2.47342	-2.97763	0.00290489	NA			ort001127	194.253	5.9129	2.17403	2.71979	0.00653237	0.565476			ort006143	246.37	6.13078	2.22733	2.75252	0.00591379	0.414839			ort005901	121.893	10.3886	3.69325	2.81286	0.00491028	NA			ort003768	2424.99	5.10932	1.81258	2.81881	0.00482017	0.273702			ort004135	655.715	-5.60884	2.00226	-2.80126
ort007992	1958.75	-7.02797	2.36031	-2.97756	0.00290552	0.0488686			ort000274	844.38	-4.39505	1.61813	-2.71614	0.00660487	0.565476			ort000605	107.891	-9.9894	3.63346	-2.74928	0.00597264	NA			ort005947	121.387	10.3826	3.69422	2.81049	0.00494657	NA			ort011224	1574.2	5.16116	1.84097	2.80351	0.00505503	0.282873			ort009636	615.427	-5.64358	2.01562	-2.79992
ort009159	47.2671	-10.5681	3.54933	-2.97748	0.0029063	NA			ort001239	443.805	-4.82386	1.77643	-2.71547	0.00661808	0.565476			ort000274	764.741	-4.93346	1.79768	-2.74434	0.00606325	0.420544			ort009462	174.494	-8.42616	3.00044	-2.80831	0.0049802	0.285621			ort004622	203.687	7.04719	2.51447	2.80266	0.00506833	0.282873			ort001989	803.196	-5.48387	1.96024	-2.79755
ort009810	47.2671	-10.5681	3.54933	-2.97748	0.0029063	NA			ort002364	81.3516	9.70848	3.57696	2.71417	0.00664419	0.565476			ort001606	2025.42	4.49118	1.63978	2.7389	0.00616457	0.420581			ort005061	122.088	-10.3577	3.68915	-2.80762	0.00499094	NA			ort008223	322.854	-6.17205	2.2062	-2.7976	0.00514844	0.284484			ort011183	611.781	-5.63483	2.01497	-2.79649
ort010167	3290.11	-6.98736	2.35206	-2.97074	0.00297086	0.0488686			ort007516	80.8786	9.70007	3.57916	2.71016	0.00672517	0.566908			ort002718	521.674	-5.19663	1.89865	-2.73701	0.00620005	0.420581			ort006684	678.988	5.81342	2.07421	2.80272	0.00506737	0.28637			ort009997	302.493	-6.24901	2.2355	-2.79535	0.00518432	0.284484			ort001339	702.476	-5.53681	1.98276	-2.79248
ort009462	82.8867	-8.93278	3.00901	-2.96868	0.00299082	NA			ort008508	701.025	-4.46978	1.65115	-2.70707	0.00678795	0.566908			ort000717	326.555	-5.65683	2.07643	-2.7243	0.0064438	0.432365			ort009385	171.034	-8.39718	3.00235	-2.79687	0.00516003	0.28637			ort011600	175.7	7.42137	2.66309	2.78676	0.00532386	0.288316			ort002875	1375.8	-5.25491	1.88216	-2.79196
ort005422	23555.7	-6.95727	2.34365	-2.96856	0.00299196	0.0488686			ort007253	138.318	-6.59212	2.43688	-2.70514	0.00682754	0.566908			ort006589	90.5841	10.1503	3.74085	2.71337	0.00666036	NA			ort008827	2212.58	5.3656	1.91909	2.79591	0.00517533	0.28637			ort007860	215.953	-6.76849	2.43202	-2.78307	0.0053847	0.288316			ort002383	584.346	-5.63577	2.02105	-2.78854
ort005161	45.79	-10.5223	3.55349	-2.96111	0.00306534	NA			ort003802	75.0569	-9.75261	3.62535	-2.69012	0.00714267	0.58766			ort001712	253.619	-5.94939	2.20032	-2.70388	0.00685359	0.454917			ort004550	787.156	5.70275	2.04016	2.79524	0.00518607	0.28637			ort000026	1351.29	-5.13894	1.84658	-2.78296	0.00538661	0.288316			ort001653	229.593	-6.6952	2.40497	-2.78391
ort003208	3280.62	-6.93609	2.34741	-2.95478	0.0031289	0.0496472			ort008152	77.5678	9.63977	3.59521	2.68128	0.00733402	0.58766			ort008113	266.133	5.77705	2.14211	2.69689	0.00699897	0.459624			ort000378	987.053	-5.57855	1.99968	-2.78972	0.00527534	0.28637			ort001535	155.073	8.24483	2.96626	2.77954	0.0054436	0.288997			ort000274	745.591	-5.46929	1.96547	-2.78268
ort002606	94.8728	-8.12544	2.7597	-2.94432	0.00323665	NA			ort004249	469.189	4.65005	1.73933	2.67348	0.00750697	0.58766			ort008636	7423.08	4.15089	1.54133	2.69305	0.00708024	0.460067			ort000804	186.61	7.55275	2.70815	2.7889	0.00528876	0.28637			ort001303	106.968	10.1564	3.65828	2.77628	0.00549844	NA			ort001100	109.37	-10.0818	3.62496	-2.78121
ort008182	94.8728	-8.12544	2.7597	-2.94432	0.00323665	NA			ort008636	4149.13	3.8351	1.43635	2.67003	0.00758449	0.58766			ort002364	87.1223	10.0941	3.75586	2.68755	0.00719788	NA			ort004306	1132.89	5.51648	1.97885	2.78771	0.00530814	0.28637			ort011267	106.477	10.1498	3.6597	2.77339	0.00554758	NA			ort000508	359.571	-6.01216	2.16405	-2.77819
ort004586	44.3129	-10.475	3.55799	-2.94407	0.00323929	NA			ort011183	751.629	-4.31539	1.61706	-2.66866	0.00761545	0.58766			ort011538	1079.86	4.55047	1.69334	2.68727	0.00720392	0.460319			ort004867	416.12	6.11174	2.19495	2.78446	0.00536176	0.286832			ort005859	167.078	-7.40296	2.67602	-2.76641	0.00566773	0.29847			ort006059	353.279	5.99099	2.15736	2.77701
ort009737	114.244	-7.80728	2.65298	-2.94283	0.00325225	NA			ort006680	416.32	-4.72826	1.77194	-2.6684	0.00762132	0.58766			ort008860	1214.33	-4.50128	1.67589	-2.68591	0.00723327	0.460319			ort004280	183.575	7.52897	2.70933	2.7789	0.00545426	0.289348			ort009013	885.537	5.23355	1.89563	2.76084	0.0057652	0.301174			ort007620	748.874	-5.42738	1.95827	-2.77152
ort006153	4296.51	-6.86443	2.33933	-2.93435	0.00334246	0.0496472			ort001539	863.48	4.242	1.59048	2.66712	0.00765048	0.58766			ort009385	194.693	-6.38123	2.37717	-2.68438	0.00726639	NA			ort004134	112.283	10.2701	3.71345	2.76565	0.00568093	NA			ort006427	7205.24	4.76101	1.73165	2.74941	0.00597028	0.306319			ort001760	527.652	-5.63287	2.03464	-2.76848
ort006138	10077.6	-6.85194	2.33537	-2.93398	0.00334646	0.0496472			ort001895	110.259	7.69759	2.88709	2.66621	0.0076712	0.58766			ort007516	85.3914	10.0651	3.76377	2.67421	0.00749063	NA			ort009636	1446.73	5.32998	1.93269	2.7578	0.00581914	0.300173			ort002876	983.823	5.14702	1.87214	2.74927	0.00597283	0.306319			ort004280	98.1988	10.194	3.68439	2.7668
ort000904	139429	-6.82945	2.3314	-2.92934	0.00339686	0.0496472			ort011589	123.085	6.85085	2.57296	2.66264	0.00775308	0.58766			ort008152	85.3914	10.0651	3.76377	2.67421	0.00749063	NA			ort007070	179.449	-7.4626	2.70673	-2.75706	0.00583237	0.300173			ort002207	639.349	-5.35864	1.9516	-2.74577	0.00603688	0.306319			ort003802	104.813	-10.0204	3.63651	-2.75549
ort003408	385.446	-7.05481	2.4086	-2.929	0.0034005	NA			ort009385	130.39	-6.50605	2.44685	-2.65895	0.00783842	0.58766			ort004819	3249.52	-4.1824	1.56598	-2.67078	0.00756753	0.476677			ort007933	225.532	6.82104	2.47418	2.75689	0.0058354	0.300173			ort009462	183.364	-6.94906	2.53154	-2.74499	0.00605132	0.306319			ort000400	103.901	-10.0078	3.63898	-2.75016
ort006914	42.8358	-10.426	3.56287	-2.92631	0.00343012	NA			ort004819	3433.92	-3.82343	1.43904	-2.65693	0.00788554	0.58766			ort009725	1062.82	-4.49927	1.68709	-2.66689	0.00765567	0.477358			ort006143	201.266	7.07387	2.56649	2.75625	0.00584691	0.300173			ort008085	226.787	6.45978	2.35954	2.73773	0.00618645	0.309904			ort000751	95.4558	10.1531	3.69311	2.74921
ort002418	2586.58	-6.84262	2.34058	-2.92347	0.00346155	0.0496472			ort001289	128.804	-6.4882	2.44899	-2.64933	0.00806509	0.58766			ort003321	149.342	-7.00465	2.63924	-2.65404	0.00795335	NA			ort010933	110.26	10.2439	3.71809	2.75515	0.00586653	NA			ort010752	975.501	5.10667	1.8664	2.73611	0.00621705	0.309904			ort002613	151.388	-8.10295	2.9496	-2.74714
ort008508	495.766	-6.98128	2.38859	-2.92277	0.00346937	NA			ort005844	278.47	5.09264	1.92239	2.64911	0.00807029	0.58766			ort000888	4689.95	4.06057	1.53347	2.64796	0.008098	0.496585			ort007158	695.793	-5.53717	2.02572	-2.73342	0.00626794	0.319214			ort001127	203.706	6.62865	2.42927	2.72866	0.00635932	0.312639			ort009462	102.99	-9.99507	3.6415	-2.74477
ort001056	185.822	-7.28389	2.49651	-2.91763	0.00352698	NA			ort002108	155.122	-6.01328	2.27023	-2.64875	0.0080789	0.58766			ort009013	835.64	4.54918	1.71872	2.64683	0.00812491	0.496585			ort003245	150.711	8.24741	3.01979	2.73112	0.00631186	NA			ort001636	579.016	5.36072	1.96575	2.72705	0.00639026	0.312639			ort001303	93.81	10.128	3.69857	2.73836
ort000670	297.62	-7.06888	2.42675	-2.9129	0.00358086	NA			ort008113	336.033	4.87151	1.8406	2.6467	0.00812811	0.58766			ort001857	235.12	5.73504	2.1714	2.64117	0.00826207	0.500017			ort005992	105.202	10.1761	3.7304	2.7279	0.00637393	NA			ort001857	222.861	6.4343	2.36056	2.72575	0.00641556	0.312639			ort008236	1085.58	5.13313	1.87693	2.73486
ort008015	335026	-6.76973	2.32591	-2.91057	0.00360766	0.0496472			ort003468	73.784	9.56762	3.61514	2.64654	0.00813194	0.58766			ort001240	259.973	-5.61657	2.13158	-2.63494	0.00841528	0.504345			ort004581	194.289	-6.98913	2.56378	-2.7261	0.00640866	0.32379			ort004867	372.687	5.67942	2.09325	2.71321	0.00666357	0.322319			ort010523	101.167	-9.96931	3.64667	-2.73381
ort004346	8682.46	-6.77863	2.32904	-2.91048	0.00360877	0.0496472			ort000050	114.06	-6.90173	2.60823	-2.64613	0.00814179	0.58766			ort000281	9222.46	-3.94902	1.50173	-2.62966	0.00854712	0.507321			ort000015	150.274	-8.2099	3.01619	-2.72195	0.00648988	NA			ort004203	297.36	-5.89724	2.17984	-2.70535	0.00682323	0.327615			ort001606	3620.26	-4.84424	1.77889	-2.72318
ort000609	106.859	-7.71041	2.65216	-2.90722	0.0036466	NA			ort010846	154.593	-6.00828	2.27067	-2.64604	0.00814409	0.58766			ort002207	508.67	-4.82715	1.83879	-2.62519	0.00866019	0.509137			ort010846	103.306	-10.1167	3.73155	-2.71113	0.00670549	NA			ort004581	192.006	-6.59728	2.44157	-2.70206	0.00689106	0.328457			ort011267	91.067	10.0852	3.70808	2.71979
ort009189	4587.97	-6.7766	2.33099	-2.90718	0.00364709	0.0496472			ort001967	683.778	-4.29664	1.62485	-2.64433	0.0081854	0.58766			ort005992	109.48	7.9753	3.04476	2.61936	0.00880962	NA			ort003865	465.111	5.68021	2.10237	2.70181	0.00689633	0.345685			ort003823	154.11	7.23104	2.6804	2.69775	0.00698094	0.33033			ort009695	185.752	-6.80555	2.50333	-2.71859
ort004493	11764.4	-6.76557	2.32723	-2.90714	0.00364755	0.0496472			ort003321	113.531	-6.89497	2.60921	-2.64256	0.00822828	0.58766			ort005030	772.962	-4.49204	1.71931	-2.61271	0.00898287	0.514614			ort011267	100.145	10.1051	3.74405	2.69897	0.00695554	NA			ort005030	425.585	-5.48053	2.03385	-2.69466	0.00704603	0.331011			ort003082	1702.42	-4.95379	1.8223	-2.71843
ort001120	459.301	8.27582	2.85091	2.90287	0.00369756	NA			ort008424	915.877	-4.09568	1.55911	-2.62693	0.00861582	0.611065			ort009664	811.234	-4.46265	1.70839	-2.6122	0.00899612	0.514614			ort000751	99.6388	10.0978	3.74549	2.69598	0.00701824	NA			ort005012	9786.98	4.56429	1.69595	2.69129	0.00711756	0.331398			ort000717	449.54	-5.56074	2.04732	-2.7161
ort002127	382.661	-6.96116	2.39926	-2.90138	0.00371522	NA			ort007486	70.9462	9.51104	3.63134	2.61915	0.00881492	0.620875			ort001307	2322.46	-4.0713	1.55874	-2.61192	0.00900345	0.514614			ort011600	99.1331	10.0904	3.74694	2.69297	0.00708182	NA			ort003309	172.284	6.80363	2.53138	2.68772	0.00719419	0.331398			ort010555	282.827	-5.98734	2.21423	-2.70403
ort008775	159.065	-7.28196	2.51665	-2.89351	0.00380963	NA			ort000952	447.06	-4.50015	1.72092	-2.61497	0.00892344	0.624213			ort010154	1042.88	-4.30566	1.65424	-2.60281	0.00924645	0.522142			ort008508	514.792	-5.56882	2.06868	-2.69197	0.00710306	0.352263			ort007908	909.278	4.97489	1.85137	2.68715	0.00720652	0.331398			ort007463	328.499	5.76685	2.13491	2.70121
ort008221	39.8816	-10.323	3.57383	-2.88848	0.00387107	NA			ort002207	427.615	-4.51043	1.7304	-2.60658	0.00914503	0.633372			ort001596	76.7368	9.91094	3.80797	2.60268	0.0092498	NA			ort004046	786.041	5.31381	1.97515	2.69033	0.00713822	0.352263			ort004503	1141.87	-4.86897	1.81483	-2.68289	0.00729897	0.333302			ort009092	487.187	-5.43968	2.01459	-2.70015
ort001613	11818.7	-6.69827	2.32107	-2.88585	0.00390359	0.0521661			ort005193	200.301	-5.36974	2.06106	-2.60534	0.0091784	0.633372			ort001127	200.213	5.82674	2.24048	2.60067	0.00930433	0.522142			ort001080	140.596	8.14684	3.02832	2.69021	0.00714061	NA			ort007299	401.657	-5.47493	2.04367	-2.67897	0.00738485	0.334882			ort003841	95.243	-9.88225	3.66477	-2.69656
ort005856	190.423	-7.12546	2.47425	-2.87984	0.00397874	NA			ort000107	401.353	-4.53881	1.74673	-2.59847	0.00936404	0.641846			ort004203	270.226	-5.3777	2.0769	-2.58929	0.00961735	0.534846			ort003930	155.252	7.28578	2.7237	2.67496	0.00747383	0.364984			ort003027	165.531	-6.8002	2.54323	-2.67385	0.00749871	0.335347			ort003713	1442.83	-4.92168	1.82553	-2.69603
ort010260	69.5929	-8.68002	3.01528	-2.87867	0.00399351	NA			ort004988	452.384	4.42779	1.7077	2.59283	0.00951899	0.648116			ort004504	83.1934	-9.61436	3.7272	-2.57951	0.00989408	NA			ort002364	95.5926	10.0379	3.75754	2.67142	0.00755318	NA			ort002813	165.022	-6.79571	2.54361	-2.67168	0.00754723	0.335347			ort009923	1009.78	5.00325	1.86114	2.68827
ort010698	259.046	-6.98344	2.42807	-2.87613	0.00402584	NA			ort000281	7766.78	-3.55935	1.37591	-2.5869	0.00968426	0.655003			ort008320	83.1934	-9.61436	3.7272	-2.57951	0.00989408	NA			ort006532	153.229	7.26674	2.72501	2.66669	0.00766028	0.364984			ort006059	320.147	5.68264	2.12706	2.6716	0.00754915	0.335347			ort008508	882.971	-5.05502	1.88194	-2.68608
ort001320	97.9962	-7.58488	2.65172	-2.86036	0.00423154	NA			ort003027	154.009	-5.73519	2.22092	-2.58235	0.00981297	0.659342			ort005727	905.611	4.2847	1.66298	2.57651	0.00998022	0.550071			ort002877	1768.44	4.9516	1.85866	2.66407	0.0077202	0.364984			ort010850	128.375	-8.02575	3.0046	-2.67116	0.007559	NA			ort001592	84.4839	9.97695	3.7331	2.67257
ort008779	414.449	8.12708	2.84233	2.8593	0.0042457	NA			ort011398	130.334	-6.08509	2.35977	-2.57868	0.00991782	0.660244			ort005161	82.7601	-9.60682	3.72929	-2.57604	0.0099938	NA			ort002662	1310.58	5.02515	1.88682	2.66329	0.00773807	0.364984			ort000033	89.1626	-9.94804	3.72522	-2.67046	0.00757476	NA			ort001895	84.4839	9.97695	3.7331	2.67257
ort002941	2366.2	-6.6377	2.3223	-2.85824	0.00425992	0.0559115			ort006143	215.815	5.17464	2.00773	2.57736	0.0099557	0.660244			ort001895	115.683	7.0497	2.74103	2.57192	0.0101137	NA			ort007253	236.337	-6.26445	2.35263	-2.66275	0.00775055	0.364984			ort005161	89.1626	-9.94804	3.72522	-2.67046	0.00757476	NA			ort007860	250.834	-6.00711	2.2491	-2.6709
ort005575	381.522	-6.80354	2.38306	-2.85495	0.0043043	NA			ort009997	151.366	-5.70975	2.2231	-2.56837	0.0102178	0.669756			ort007486	73.275	9.84434	3.82823	2.57151	0.0101255	NA			ort003768	1598.64	4.97004	1.86658	2.66265	0.00775287	0.364984			ort004280	90.2845	9.91179	3.71482	2.66817	0.00762651	NA			ort002364	82.8381	9.94857	3.74002	2.66003
ort006628	377.091	-6.78653	2.38193	-2.84918	0.00438327	NA			ort006240	182.067	5.39424	2.10244	2.5657	0.0102967	0.669756			ort009130	378.941	4.86575	1.89725	2.56463	0.0103286	0.560552			ort009997	289.26	-5.96678	2.24496	-2.65786	0.00786396	0.364984			ort001895	89.7939	9.90393	3.71679	2.66464	0.00770702	NA			ort006589	82.8381	9.94857	3.74002	2.66003
ort000033	36.9274	-10.2119	3.58705	-2.84689	0.00441492	NA			ort006684	351.029	4.56051	1.77825	2.56461	0.0103293	0.669756			ort004777	881.522	4.25874	1.66108	2.56384	0.010352	0.560552			ort002875	1418.6	-4.98244	1.87505	-2.65723	0.0078785	0.364984			ort003802	179.778	-6.50133	2.44788	-2.6559	0.00790965	0.346846			ort008636	9054.15	4.57128	1.71971	2.65817
ort001054	6787.79	-6.55506	2.30913	-2.83875	0.00452903	0.0573851			ort007620	806.741	-3.97472	1.55049	-2.56353	0.0103614	0.669756			ort001539	906.19	4.22727	1.65249	2.55812	0.0105241	0.563646			ort005852	19496.4	4.71681	1.77633	2.65537	0.00792205	0.364984			ort001307	2601.07	-4.57813	1.72389	-2.65571	0.00791424	0.346846			ort009042	1403.7	4.78245	1.80321	2.65219
ort004919	2077.62	-6.57972	2.31803	-2.8385	0.00453266	0.0573851			ort003286	101.903	-6.73769	2.6331	-2.55884	0.0105022	0.67374			ort001239	440.355	-4.71465	1.84462	-2.55589	0.0105918	0.563646			ort000932	232.383	-6.23979	2.35274	-2.65213	0.00799847	0.364984			ort011538	908.881	4.84454	1.82998	2.64731	0.0081134	0.349923			ort004950	81.7409	9.92934	3.74478	2.65152
ort006949	180666	-6.52741	2.30379	-2.83334	0.00460642	0.0573851			ort000378	834.422	-3.93875	1.54068	-2.5565	0.0105732	0.67374			ort000627	99.0949	7.83091	3.06916	2.55148	0.0107266	NA			ort007791	190.128	6.57229	2.48053	2.64955	0.00805997	0.364984			ort001343	687.016	-4.98005	1.88124	-2.64722	0.00811563	0.349923			ort003266	239.897	-5.94177	2.24958	-2.64128
ort011133	77.1476	-7.82589	2.76332	-2.83205	0.00462499	NA			ort004837	107.003	6.64698	2.60163	2.55493	0.010621	0.67374			ort011671	99.0949	7.83091	3.06916	2.55148	0.0107266	NA			ort003286	171.551	-6.80806	2.57156	-2.64744	0.00811032	0.364984			ort007388	1708.04	4.63154	1.75065	2.64562	0.00815425	0.349923			ort009385	164.789	-6.63115	2.51354	-2.63817
ort004055	553.419	-6.66074	2.35216	-2.83176	0.00462928	NA			ort008147	234.428	4.93919	1.94217	2.54313	0.0109866	0.68841			ort007873	177.504	-5.91953	2.32026	-2.55124	0.0107342	NA			ort000508	283.823	-5.93896	2.24438	-2.64615	0.00814134	0.364984			ort002613	193.007	-6.27922	2.37831	-2.6402	0.00828566	0.349923			ort001957	509.981	-5.17726	1.96411	-2.63593
ort005251	1341.96	-6.5626	2.32161	-2.82675	0.00470235	NA			ort008223	282.09	-4.70649	1.85068	-2.54311	0.0109871	0.68841			ort000804	125.925	6.58302	2.5857	2.54593	0.0108987	NA			ort003074	90.029	9.95143	3.7758	2.63558	0.00839929	NA			ort003841	85.0866	-9.88053	3.74266	-2.63998	0.00829112	NA			ort009789	1914.48	-4.65755	1.76794	-2.63445
ort001174	123.445	-7.17857	2.54254	-2.82338	0.00475198	NA			ort005868	111.361	-6.27575	2.47679	-2.53382	0.0112826	0.698693			ort000926	124.771	6.5696	2.58744	2.53903	0.011116	NA			ort004203	225.463	-6.19559	2.35304	-2.63302	0.00846291	0.376748			ort000508	339.045	-5.49389	2.08129	-2.63966	0.00829903	0.349923			ort011536	112.918	7.94704	3.0269	2.62547
ort002574	725.901	6.92904	2.45785	2.81915	0.00481517	NA			ort003294	86.6298	-7.50897	2.96516	-2.5324	0.0113286	0.698693			ort008506	143.853	-6.3594	2.50485	-2.53884	0.0111221	NA			ort002273	89.5232	9.9433	3.77757	2.6322	0.00848345	NA			ort005075	196.856	6.25309	2.36916	2.63937	0.00830599	0.349923			ort009483	161.599	-6.60266	2.51543	-2.62487
ort007427	20543.1	-6.48285	2.3005	-2.81802	0.00483215	0.0582233			ort002460	910.137	3.83167	1.51357	2.53154	0.0113564	0.698693			ort009303	214.333	-5.50569	2.17168	-2.53522	0.0112378	0.592913			ort001127	221.463	6.20307	2.35827	2.63035	0.00852967	0.377083			ort002364	84.8871	9.82285	3.73766	2.62808	0.00858685	NA			ort006760	366.892	5.37063	2.04672	2.62401
ort002600	9984.12	-6.47221	2.30051	-2.81338	0.00490242	0.0582233			ort005885	59.1998	-9.41022	3.73048	-2.52252	0.0116517	0.712568			ort002430	11811	-3.64832	1.44236	-2.52941	0.0114254	0.597702			ort001636	329.114	5.65012	2.15893	2.6171	0.00886809	0.38934			ort000932	332.931	-5.46705	2.08076	-2.62743	0.00860337	0.359929			ort000483	84.7617	-9.71405	3.7026	-2.62358
ort001069	3188.98	-6.47812	2.3052	-2.81022	0.00495072	0.0582233			ort000329	748.181	-3.88932	1.54342	-2.51993	0.0117377	0.713554			ort000389	108.183	6.95224	2.75577	2.5228	0.0116426	NA			ort011508	123.399	7.95791	3.04647	2.61217	0.00899695	NA			ort003120	773.952	-4.84599	1.84578	-2.62544	0.00865373	0.359929			ort009961	908.053	-4.80933	1.83862	-2.61574
ort006604	4889.38	-6.46201	2.30158	-2.80764	0.00499057	0.0582233			ort000717	475.882	-4.14013	1.64844	-2.51154	0.0120205	0.726421			ort010933	68.0823	9.7383	3.86199	2.52157	0.0116831	NA			ort002207	457.961	-5.32754	2.04395	-2.6065	0.00914737	0.398435			ort010933	84.3964	9.81449	3.73965	2.62444	0.00867918	NA			ort008187	2016.66	4.58507	1.7531	2.61541
ort007075	133.954	-7.03235	2.50943	-2.80237	0.0050729	NA			ort001183	57.0855	-9.35775	3.74824	-2.49657	0.01254	0.74912			ort003831	76.2606	-9.48883	3.76318	-2.52149	0.0116859	NA			ort007860	179.472	-6.45461	2.47864	-2.60409	0.00921187	0.398435			ort007966	402.619	-5.25067	2.00603	-2.61745	0.00885901	0.366135			ort010562	76.8035	9.83945	3.76772	2.61151
ort003125	117.537	-7.10731	2.54129	-2.79673	0.00516224	NA			ort004186	112.262	6.12504	2.45346	2.49649	0.0125428	0.74912			ort011248	74.9607	-9.46402	3.77059	-2.50996	0.0120745	NA			ort001992	311.043	-5.65095	2.17161	-2.60219	0.00926302	0.398435			ort003321	118.185	-7.90596	3.02098	-2.61702	0.00887006	NA			ort001307	2363.34	-4.54463	1.74087	-2.61054
ort010247	158.419	9.18742	3.28672	2.79532	0.00518488	NA			ort009664	867.194	-3.74811	1.50278	-2.49412	0.0126271	0.74977			ort007158	399.048	-4.62148	1.84702	-2.50213	0.0123449	0.640378			ort005949	3920.25	4.6052	1.77328	2.597	0.00940406	0.401787			ort002922	136.446	7.05417	2.6993	2.61333	0.00896643	0.368244			ort006684	538.214	5.03316	1.93004	2.6078
ort009067	3569.75	-6.42879	2.29992	-2.79523	0.00518631	0.0589225			ort002718	341.68	-4.33963	1.7441	-2.48818	0.01284	0.750997			ort003468	65.1975	9.67583	3.88279	2.49198	0.0127032	NA			ort002383	512.39	-5.19061	2.0036	-2.59064	0.00957984	0.405578			ort004777	1101.66	4.64679	1.78088	2.60927	0.00907354	0.370314			ort004867	456.026	5.11848	1.96785	2.60106
ort003477	12722.5	-6.40942	2.29424	-2.7937	0.00521084	0.0589225			ort008446	81.3441	-7.41763	2.98303	-2.48661	0.0128966	0.750997			ort004251	140.639	5.99806	2.41157	2.4872	0.0128754	NA			ort008925	665.654	5.02977	1.943	2.58867	0.00963486	0.405578			ort005662	151.676	6.61808	2.54747	2.5979	0.00937946	0.380422			ort003330	75.1577	9.8082	3.77599	2.59752
ort010069	59.2532	-8.44736	3.02457	-2.79291	0.00522359	NA			ort003519	603.206	3.91392	1.57445	2.4859	0.0129224	0.750997			ort000372	250.847	5.04675	2.02979	2.48634	0.0129064	0.663926			ort001760	535.15	-5.1491	1.99044	-2.58692	0.00968392	0.405578			ort008580	150.204	6.60386	2.54882	2.59095	0.0095712	0.383533			ort011538	775.721	4.79967	1.84974	2.59479
ort010108	1023.32	-6.45796	2.31607	-2.78833	0.00529802	NA			ort004203	226.34	-4.76283	1.91851	-2.48257	0.0130439	0.750997			ort010512	307.971	4.77769	1.92808	2.47795	0.0132139	0.674128			ort011538	1098.18	4.7998	1.8588	2.58221	0.00981701	0.408465			ort011183	552.64	-4.92052	1.89944	-2.59051	0.0095835	0.383533			ort004106	107.432	7.87489	3.0366	2.59333
ort008236	2543.98	6.48615	2.32662	2.7878	0.00530666	0.0590968			ort002993	217.401	4.82672	1.94435	2.48243	0.0130489	0.750997			ort006756	340.717	4.65598	1.88278	2.47293	0.013401	0.67807			ort008580	16295.2	17.4506	6.76644	2.57899	0.00990898	0.409614			ort007499	115.328	7.81598	3.01986	2.58819	0.00964814	NA			ort003753	1775.58	-4.53314	1.75007	-2.59026
ort002306	553.481	6.95303	2.49759	2.7839	0.00537099	NA			ort005328	136.037	-5.5526	2.23774	-2.48134	0.013089	0.750997			ort011432	16148	-3.46502	1.40413	-2.46773	0.0135973	0.682406			ort009013	739.394	4.88402	1.9064	2.5619	0.0104101	0.427553			ort001537	498.602	4.98277	1.92552	2.58775	0.00966055	0.383533			ort001127	236.065	5.66679	2.19621	2.58026
ort001385	287.957	-6.63046	2.38181	-2.78379	0.00537276	NA			ort000882	292.687	4.46415	1.80178	2.47763	0.0132257	0.753236			ort011600	62.8896	9.62384	3.90062	2.46726	0.0136152	NA			ort007170	642.376	4.94005	1.93106	2.55821	0.0105212	0.429345			ort004106	131.048	6.99549	2.70621	2.58498	0.00973843	0.383533			ort000152	45012.7	4.29371	1.66498	2.57884
ort002876	150.802	9.11634	3.28506	2.77509	0.00551856	NA			ort001059	55.4998	-9.31711	3.76252	-2.47629	0.0132755	0.753236			ort000355	1342.44	3.7817	1.53542	2.46297	0.0137793	0.685963			ort007486	78.9018	9.7611	3.81949	2.5556	0.0106004	NA			ort003753	1947.02	-4.41223	1.70726	-2.5844	0.00975491	0.383533			ort003500	201.525	-5.91222	2.29629	-2.57468
ort010242	154.972	-6.82591	2.46275	-2.77166	0.00557708	NA			ort010523	54.9713	-9.3033	3.76744	-2.46939	0.0135342	0.763673			ort003005	62.3126	9.61054	3.90505	2.46105	0.0138529	NA			ort003802	113.203	-7.79962	3.0561	-2.55215	0.010706	NA			ort006756	343.794	5.27396	2.04219	2.58251	0.00980858	0.383533			ort010850	131.43	-6.89216	2.67807	-2.57355
ort006564	83.2252	-7.34785	2.65298	-2.76966	0.00561153	NA			ort003570	383.33	4.1767	1.69381	2.46586	0.0136683	0.767002			ort003984	62.3126	9.61054	3.90505	2.46105	0.0138529	NA			ort004020	313.043	-5.43323	2.13098	-2.54964	0.0107835	0.435602			ort005440	1467.51	4.46221	1.7304	2.57872	0.00991677	0.384639			ort002254	466.719	5.00168	1.94469	2.57197
ort003657	3944.48	-6.34603	2.2916	-2.76926	0.00561845	0.0609225			ort003753	1328.36	-3.50744	1.42424	-2.46267	0.0137906	0.768983			ort003768	1683.32	3.69202	1.50345	2.4557	0.0140609	0.694384			ort006534	1018.09	-4.71154	1.84858	-2.54874	0.0108114	0.435602			ort000281	9841.65	-4.22067	1.63757	-2.5774	0.00995466	0.384639			ort007388	1596.29	4.49244	1.7475	2.57078
ort001145	4658.03	-6.33816	2.29013	-2.7676	0.00564702	0.0609225			ort009923	321.343	4.3193	1.75509	2.46102	0.0138542	0.768983			ort009997	191.368	-5.33837	2.17895	-2.44997	0.0142866	NA			ort007623	418.522	5.16244	2.02843	2.54505	0.0109263	0.437463			ort010969	78.0176	9.70111	3.77081	2.57268	0.0100914	NA			ort001548	149.295	-6.48719	2.52373	-2.57047
ort011560	32382.9	-6.29678	2.28277	-2.75839	0.00580867	0.0609225			ort004817	305.151	4.34922	1.77191	2.45454	0.0141066	0.778762			ort005088	154.54	-5.7161	2.3359	-2.44707	0.0144024	NA			ort001895	77.3845	9.73309	3.8264	2.54367	0.0109695	NA			ort002662	1322.52	4.47093	1.73827	2.57206	0.0101096	0.388259			ort007499	71.3176	9.73253	3.79662	2.56347
ort007542	14338.6	-6.29268	2.28311	-2.75618	0.00584805	0.0609225			ort011607	947.417	3.59495	1.46691	2.4507	0.0142579	0.780113			ort003865	379.956	4.4644	1.82479	2.44653	0.014424	0.705731			ort005193	128.043	-6.97238	2.74114	-2.5436	0.0109716	NA			ort001080	162.489	6.29881	2.45152	2.56935	0.0101891	0.388259			ort003768	2264.55	4.3982	1.71683	2.56182
ort003049	66.8079	-7.6173	2.76892	-2.751	0.00594132	NA			ort010512	400.58	4.0912	1.67039	2.44925	0.0143154	0.780113			ort000689	1933.04	3.61793	1.48145	2.44215	0.0146	0.705731			ort007074	13720.8	17.2025	6.76644	2.54233	0.0110117	0.438129			ort011536	128.104	6.96245	2.71024	2.56894	0.0102009	NA			ort002813	129.151	-6.86672	2.68063	-2.5616
ort010047	54.8219	-8.33488	3.03042	-2.7504	0.0059522	NA			ort001748	371.364	-4.1452	1.69322	-2.44812	0.0143602	0.780113			ort002625	391.679	-4.43484	1.81657	-2.44132	0.0146336	0.705731			ort002813	127.054	-6.96111	2.74216	-2.53855	0.0111313	NA			ort005999	439.645	5.00845	1.95034	2.56799	0.0102291	0.388259			ort003740	288.266	5.36354	2.09471	2.56052
ort006265	31.0191	-9.96039	3.62228	-2.74976	0.00596395	NA			ort010242	129.695	-5.48221	2.24497	-2.442	0.0146063	0.789283			ort000152	17335.3	3.37917	1.38659	2.43704	0.0148079	0.707989			ort011317	1442.66	-4.57303	1.80185	-2.53796	0.0111499	0.440872			ort000952	405.62	-5.06363	1.97331	-2.56606	0.0102862	0.388259			ort008223	337.343	-5.22618	2.04251	-2.5587
ort000794	1269.8	-6.31593	2.29875	-2.74755	0.00600419	NA			ort001339	899.91	-3.57811	1.46822	-2.43704	0.014808	0.792246			ort008223	176.492	-5.41609	2.22342	-2.43593	0.0148534	NA			ort006250	174.943	6.12484	2.4184	2.5326	0.0113219	0.441978			ort010846	107.995	-7.77531	3.04048	-2.55726	0.0105499	NA			ort007516	101.397	7.79112	3.0485	2.55572
ort001702	316.791	7.73783	2.82075	2.74318	0.00608468	NA			ort005620	54.865	9.14019	3.75084	2.43684	0.0148163	0.792246			ort008001	164.649	-5.54102	2.27481	-2.43581	0.0148584	NA			ort007051	75.8671	9.70452	3.83356	2.53146	0.0113588	NA			ort005992	75.5642	9.65501	3.78406	2.55149	0.0107262	NA			ort003292	75.6476	-9.54993	3.74382	-2.55085
ort002728	4862.05	-6.25209	2.2818	-2.73997	0.0061444	0.0609225			ort010066	656.178	3.71227	1.52725	2.43069	0.0150702	0.797639			ort003326	110.345	-6.56408	2.69547	-2.43523	0.0148824	NA			ort001539	1197.6	4.59922	1.81723	2.53089	0.0113773	0.441978			ort006589	75.5642	9.65501	3.78406	2.55149	0.0107262	NA			ort003823	146.652	6.312	2.47455	2.55077
ort009262	132.646	-6.79384	2.48015	-2.73929	0.00615717	NA			ort004136	54.3921	9.1277	3.75531	2.43061	0.0150734	0.797639			ort010969	60.0047	9.55609	3.92441	2.43504	0.0148903	NA			ort002718	589.131	-4.89004	1.93235	-2.53062	0.0113862	0.441978			ort004816	975.027	4.4999	1.76582	2.54833	0.010824	0.406212			ort001728	308.834	5.19573	2.05095	2.53332
ort010974	6088.38	-6.23905	2.2798	-2.73667	0.00620651	0.0609225			ort000629	162.731	5.05343	2.08082	2.42857	0.0151583	0.797999			ort007620	1487.23	-3.66798	1.507	-2.43396	0.0149345	0.707989			ort010752	781.788	4.74137	1.8756	2.52792	0.0114742	0.442695			ort001592	75.0735	9.64561	3.7868	2.54716	0.0108602	NA			ort004251	68.026	9.66436	3.81596	2.53261
ort001087	5582.52	-6.23888	2.28006	-2.73628	0.00621379	0.0609225			ort005359	97.09	-6.07516	2.50706	-2.42322	0.0153837	0.804106			ort006077	109.912	-6.55834	2.69632	-2.43233	0.015002	NA			ort006059	257.316	5.53372	2.19279	2.5236	0.0116159	0.445463			ort009202	75.0735	9.64561	3.7868	2.54716	0.0108602	NA			ort000882	396.87	4.96601	1.96431	2.52812
ort008577	53.3448	-8.29536	3.03271	-2.7353	0.0062324	NA			ort000015	85.5171	-6.48219	2.6774	-2.42107	0.0154747	0.804106			ort001981	247.675	4.86216	2.00008	2.43098	0.0150578	0.707989			ort008320	75.1313	-9.65727	3.83318	-2.51939	0.0117558	NA			ort000751	74.5829	9.63615	3.78958	2.5428	0.0109968	NA			ort000033	72.9133	-9.49682	3.75782	-2.52722
ort009483	208.994	-6.55431	2.39866	-2.73248	0.00628588	NA			ort003768	1237.07	3.41981	1.41301	2.42023	0.0155105	0.804106			ort003472	59.4278	9.54215	3.92946	2.42836	0.0151672	NA			ort000026	1030.03	-4.59345	1.82644	-2.51498	0.011904	0.453779			ort003330	74.0922	9.62663	3.79239	2.53841	0.0111358	NA			ort007294	140.181	-6.39527	2.53112	-2.52665
ort004843	167.127	-6.61089	2.42788	-2.7229	0.0064711	NA			ort008312	3084.16	3.213	1.32993	2.41591	0.0156961	0.809619			ort008384	3825	3.45652	1.42363	2.42797	0.0151837	0.707989			ort004503	774.706	-4.69328	1.86794	-2.51254	0.0119866	0.454206			ort007485	286.819	5.29314	2.08678	2.5365	0.0111965	0.415473			ort004777	1167.8	4.42485	1.75338	2.52361
ort004467	29.542	-9.89	3.63358	-2.72183	0.00649217	NA			ort007485	352.058	4.08759	1.69472	2.41196	0.015867	0.814319			ort008187	1288.78	3.68917	1.5206	2.42613	0.015261	0.707989			ort011135	74.1428	-9.63816	3.83807	-2.5112	0.0120322	NA			ort001539	1465.27	4.33244	1.70819	2.53627	0.0112041	0.415473			ort005620	66.9288	9.6409	3.8228	2.52195
ort008769	29.542	-9.89	3.63358	-2.72183	0.00649217	NA			ort008025	7866.51	16.3032	6.76645	2.40942	0.0159778	0.815905			ort010420	366.261	-4.4377	1.83105	-2.42357	0.0153686	0.707989			ort004777	988.894	4.58545	1.82785	2.50865	0.0121193	0.456519			ort009668	1533.62	4.31492	1.70256	2.53437	0.0112649	0.415473			ort001541	71.5462	-9.46951	3.76527	-2.51496
ort003710	692.697	-6.2799	2.30739	-2.72164	0.00649586	NA			ort005227	100.437	5.96203	2.47715	2.40681	0.0160926	0.816376			ort000400	108.612	-6.54099	2.69892	-2.42356	0.015369	NA			ort010652	475.847	-4.92409	1.96647	-2.50402	0.0122789	0.45981			ort006475	72.3491	-9.64658	3.80864	-2.53281	0.0113151	NA			ort008320	71.5462	-9.46951	3.76527	-2.51496
ort011458	39153.3	-6.17862	2.27151	-2.72005	0.00652716	0.0609225			ort008509	419.888	3.92713	1.63251	2.40558	0.0161469	0.816376			ort011607	1341.73	3.66005	1.51201	2.42065	0.0154926	0.708414			ort005868	72.6599	-9.60902	3.84565	-2.49867	0.0124659	NA			ort010512	307.956	5.20071	2.05403	2.53195	0.0113431	0.415473			ort002877	1137.72	4.39874	1.75054	2.51279
ort004964	3904.91	-6.19342	2.27714	-2.71982	0.00653173	0.0609225			ort007860	189.451	-4.68386	1.95849	-2.39157	0.0167766	0.844037			ort001593	81.2089	7.54234	3.12472	2.41377	0.0157886	NA			ort008085	194.645	5.78803	2.31733	2.49771	0.0124997	0.465339			ort002718	708.642	-4.57892	1.81038	-2.52926	0.0114303	0.415473			ort005992	65.283	9.60498	3.83346	2.50557
ort005207	177.636	-6.56085	2.41536	-2.7163	0.00660159	NA			ort002291	70.2442	-7.20463	3.02848	-2.37896	0.0173614	0.861521			ort009884	6124.09	3.36301	1.39467	2.41133	0.0158945	0.719155			ort010969	71.8209	9.62544	3.85404	2.4975	0.0125074	NA			ort008515	15583.1	4.06087	1.60617	2.52829	0.011462	0.415473			ort005524	102.627	-7.53962	3.01436	-2.50123
ort000405	20324.6	-6.1672	2.27086	-2.7158	0.00661154	0.0609225			ort000088	574.309	-3.64287	1.53129	-2.37895	0.0173619	0.861521			ort001721	1382.52	-3.62198	1.50301	-2.40982	0.0159605	0.719155			ort000274	635.685	-4.71819	1.8926	-2.49297	0.0126679	0.468861			ort007986	118.676	-6.90598	2.73157	-2.52821	0.0114646	NA			ort007483	93.1685	7.66844	3.06724	2.50011
ort002284	2283.38	-6.19227	2.28036	-2.71547	0.00661813	0.0609225			ort003303	50.6083	9.02368	3.79365	2.37863	0.0173772	0.861521			ort001509	115.973	6.04245	2.51158	2.40584	0.0161353	NA			ort005161	71.6714	-9.58925	3.85086	-2.49016	0.0127685	NA			ort003930	105.024	7.68033	3.04057	2.52595	0.0115385	NA			ort003770	64.7344	9.59281	3.83712	2.5
ort002471	2762.65	-6.18697	2.27847	-2.71541	0.00661936	0.0609225			ort005030	716.829	-3.51382	1.47979	-2.37454	0.0175708	0.863731			ort005781	199.888	-5.07226	2.1132	-2.40028	0.0163826	0.731465			ort004733	308.618	-5.21472	2.09414	-2.49014	0.0127692	0.469125			ort000015	178.212	-5.89556	2.33515	-2.5247	0.0115798	0.415473			ort000389	148.754	6.00637	2.40841	2.49392
ort008315	2129.21	-6.18978	2.28071	-2.71398	0.00664808	0.0609225			ort002625	364.214	-3.94334	1.66097	-2.37412	0.0175909	0.863731			ort006630	209.015	4.96155	2.06877	2.39831	0.0164707	0.731465			ort004251	101.145	7.66972	3.08007	2.49012	0.0127702	NA			ort011003	178.212	-5.89556	2.33515	-2.5247	0.0115798	0.415473			ort006475	116.847	-6.72098	2.69642	-2.49255
ort005572	460.701	-6.30479	2.32329	-2.71374	0.00665288	NA			ort007986	109.665	-5.50369	2.32615	-2.36601	0.0179809	0.877219			ort009230	63.2617	-9.21922	3.84914	-2.39514	0.0166141	NA			ort009725	762.866	-4.61846	1.8558	-2.48866	0.0128225	0.469125			ort003992	103.552	7.65986	3.04386	2.5165	0.0118528	NA			ort003321	100.804	-7.51363	3.01808	-2.48954
ort002389	1142.26	-6.20916	2.29	-2.71142	0.00669965	NA			ort002875	672.346	-3.51972	1.48835	-2.36485	0.0180374	0.877219			ort004286	426.626	-4.20619	1.75725	-2.39362	0.0166831	0.735606			ort011295	192.357	-5.73685	2.31236	-2.48095	0.0131033	0.476661			ort000985	103.061	7.65298	3.04498	2.51331	0.0119604	NA			ort010304	2250.21	-4.17613	1.67841	-2.48814
ort001976	87.8258	-7.0081	2.58575	-2.71028	0.0067227	NA			ort007070	169.477	-4.73132	2.00412	-2.3608	0.0182357	0.882661			ort006548	543.893	-4.0125	1.67903	-2.38978	0.0168587	0.738076			ort009664	757.935	-4.58347	1.85002	-2.47753	0.0132296	0.477759			ort002367	300.795	-5.13171	2.04672	-2.50729	0.012166	0.434121			ort011032	99.893	-7.50045	3.01999	-2.4836
ort006503	87.8258	-7.0081	2.58575	-2.71028	0.0067227	NA			ort003783	49.1893	8.98265	3.80934	2.35806	0.0183709	0.885008			ort007986	89.8366	-7.27328	3.04427	-2.38917	0.0168867	NA			ort001593	114.283	6.84048	2.76156	2.47703	0.0132481	NA			ort001596	70.6575	9.55815	3.81321	2.50659	0.0121902	NA			ort006814	478.369	-4.66808	1.88603	-2.47508
ort003399	142122	-6.14362	2.26785	-2.70901	0.00674843	0.0609225			ort003593	114.265	5.40036	2.29459	2.35352	0.0185966	0.891679			ort006087	77.7471	7.47914	3.13797	2.38343	0.017152	NA			ort004667	132.009	-6.4262	2.59562	-2.47579	0.0132943	NA			ort007226	1398.06	4.25014	1.69666	2.505	0.0122453	0.434575			ort000102	250.387	-5.21076	2.10689	-2.47319
ort010347	3994.6	-6.15774	2.27362	-2.70834	0.00676215	0.0609225			ort009175	48.7164	8.96871	3.81475	2.35106	0.0187201	0.893403			ort001984	61.9618	-9.18926	3.85951	-2.38094	0.0172684	NA			ort009961	593.648	-4.68229	1.89386	-2.47235	0.0134227	0.477759			ort009601	12100.1	-3.98691	1.59471	-2.50009	0.0124161	0.438256			ort006342	89.3284	7.60741	3.07706	2.4723
ort009636	174.682	-6.5364	2.41433	-2.70734	0.00678247	NA			ort006726	249.57	-4.21277	1.79502	-2.34692	0.0189292	0.899183			ort000121	55.389	9.44061	3.96732	2.3796	0.0173316	NA			ort000152	30891.4	4.11814	1.66611	2.47171	0.0134469	0.477759			ort002208	114.09	-6.84865	2.73949	-2.49997	0.0124204	NA			ort005161	98.0702	-7.47374	3.02382	-2.47162
ort006421	4910.13	-6.14943	2.27198	-2.70664	0.00679679	0.0609225			ort002813	122.768	-5.17311	2.21083	-2.3399	0.0192889	0.909077			ort003770	55.389	9.44061	3.96732	2.3796	0.0173316	NA			ort010531	68.7862	9.56316	3.87059	2.47073	0.0134839	NA			ort005147	69.6761	9.53797	3.81941	2.49724	0.0125165	NA			ort008152	61.9914	9.53034	3.85632	2.47136
ort002201	99.8118	-6.86962	2.53865	-2.70601	0.00680963	NA			ort006463	264.948	4.13462	1.7674	2.33938	0.0193156	0.909077			ort010652	488.291	-4.05581	1.70474	-2.37914	0.0173531	0.751651			ort001307	2684.07	-4.23842	1.71566	-2.47043	0.0134952	0.477759			ort011607	1350.41	4.23109	1.69546	2.49554	0.0125767	0.441537			ort010420	338.626	-4.90025	1.98492	-2.46873
ort007666	673.218	6.4943	2.40068	2.70519	0.00682645	NA			ort005088	97.0345	-5.65213	2.41797	-2.33756	0.0194103	0.909346			ort008025	5485.24	16.0698	6.76645	2.37492	0.0175527	0.751651			ort000888	5200.66	4.17204	1.68904	2.47007	0.0135087	0.477759			ort005727	704.269	4.46191	1.7912	2.49102	0.0127376	0.444795			ort005727	629.794	4.48696	1.81753	2.46871
ort009879	50.3906	-8.21289	3.03776	-2.7036	0.00685922	NA			ort003207	1050.64	-3.24457	1.39201	-2.33085	0.0197614	0.920389			ort002662	681.46	3.81991	1.60892	2.37421	0.0175865	0.751651			ort005859	69.1999	-9.53863	3.86423	-2.46845	0.0135701	NA			ort002554	169.551	-5.82244	2.33988	-2.48835	0.0128337	0.445765			ort008001	186.579	-5.57242	2.25722	-2.4687
ort008579	111.798	-6.76932	2.5042	-2.70319	0.0068677	NA			ort003770	47.2974	8.92607	3.83155	2.32962	0.0198262	0.920389			ort005202	246.679	-4.68487	1.97497	-2.37212	0.0176865	0.751651			ort002208	98.8685	-7.60336	3.08026	-2.46841	0.0135715	NA			ort006087	68.6947	9.51751	3.82565	2.48782	0.0128531	NA			ort004817	341.099	4.85499	1.97228	2.46162
ort008820	7419.02	-6.13013	2.26888	-2.70183	0.0068959	0.0610661			ort009042	695.462	3.39802	1.46191	2.32437	0.0201055	0.923415			ort008572	1610.93	3.4636	1.4613	2.37022	0.0177776	0.751651			ort006756	223.44	5.46611	2.21645	2.46616	0.0136572	0.478241			ort007842	1973.08	4.10993	1.65416	2.48461	0.0129693	0.448094			ort000317	65.622	-9.34481	3.80091	-2.45857
ort004326	211933	-6.10447	2.26408	-2.69623	0.00701291	0.061363			ort007183	1089.09	-3.21405	1.38328	-2.3235	0.0201522	0.923415			ort004817	332.788	4.30433	1.82364	2.36029	0.0182605	0.765718			ort000417	592.246	4.64659	1.8874	2.4619	0.0138203	0.478241			ort003205	168.022	-5.80914	2.34078	-2.48171	0.0130754	0.44938			ort002662	1123.98	4.2274	1.72115	2.45616
ort007587	28.0649	-9.816	3.6462	-2.69211	0.00710008	NA			ort003865	331.887	3.87749	1.66895	2.32331	0.0201627	0.923415			ort003802	99.5128	-6.41335	2.71877	-2.35892	0.0183283	NA			ort005727	880.691	4.46855	1.81552	2.46131	0.0138432	0.478241			ort001992	224.483	-5.34303	2.16001	-2.47361	0.0133756	0.457292			ort001596	60.3456	9.49152	3.8686	2.45348
ort009990	28.0649	-9.816	3.6462	-2.69211	0.00710008	NA			ort010773	281.724	4.01732	1.73117	2.32058	0.0203096	0.925991			ort005761	459.84	-4.02907	1.71003	-2.35614	0.0184661	0.765718			ort011665	173.069	-5.80808	2.3605	-2.46053	0.0138734	0.478241			ort005449	843.488	4.31874	1.74754	2.47133	0.013461	0.457816			ort001080	151.404	5.7648	2.35531	2.44758
ort008097	252.676	-6.35643	2.36152	-2.69167	0.0071095	NA			ort011670	46.3515	8.89692	3.84326	2.31494	0.020616	0.93006			ort001419	640.636	3.80058	1.61328	2.35581	0.0184824	0.765718			ort007485	425.028	4.84051	1.96779	2.45988	0.0138984	0.478241			ort009175	66.732	9.47569	3.83894	2.46831	0.0135754	NA			ort001857	194.92	5.38448	2.20043	2.44701
ort008770	96.8576	-6.8259	2.53832	-2.68914	0.00716356	NA			ort005061	84.9329	-5.87909	2.54074	-2.31393	0.0206717	0.93006			ort004622	86.258	6.62253	2.81298	2.35428	0.0185588	NA			ort001967	579.314	-4.64564	1.89004	-2.45795	0.0139731	0.478241			ort000170	4990.81	3.92006	1.59331	2.46033	0.0138809	0.469648			ort009102	64.2549	-9.31444	3.80999	-2.44474
ort002344	124990	-6.08094	2.26189	-2.68844	0.00717876	0.0617215			ort005444	251.176	4.11077	1.7767	2.31371	0.0206838	0.93006			ort011508	97.6537	6.21183	2.63993	2.35303	0.0186211	NA			ort003991	555.359	4.65129	1.896	2.45322	0.0141586	0.481997			ort003472	65.7507	9.45431	3.84586	2.45831	0.0139593	NA			ort010933	58.6998	9.45163	3.8815	2.43504
ort007804	8771.59	-6.08176	2.26387	-2.68644	0.00722184	0.0617215			ort009669	133.228	-4.9211	2.12939	-2.31104	0.0208305	0.93006			ort003769	6219.38	3.1962	1.36059	2.34912	0.0188178	0.771845			ort003591	66.7631	9.52009	3.88263	2.45197	0.0142076	NA			ort011025	139.428	6.07494	2.47171	2.45779	0.0139796	0.470143			ort011005	563.427	-4.41457	1.81936	-2.42644
ort009330	1138.67	-6.12547	2.28188	-2.6844	0.00726597	NA			ort009798	117.158	5.16758	2.23744	2.30959	0.0209109	0.93006			ort001748	352.393	-4.2251	1.79954	-2.34788	0.0188804	0.771845			ort005620	66.7631	9.52009	3.88263	2.45197	0.0142076	NA			ort000152	45779.9	3.83708	1.56217	2.45625	0.0140395	0.470143			ort007226	624.941	4.35244	1.79469	2.42517
ort010988	59.4224	-7.44738	2.77552	-2.68324	0.00729127	NA			ort000605	63.9013	-7.06713	3.06073	-2.30897	0.0209452	0.93006			ort011135	58.9287	-9.11685	3.88525	-2.34653	0.0189491	NA			ort009175	66.7631	9.52009	3.88263	2.45197	0.0142076	NA			ort000264	64.197	-9.47411	3.86327	-2.45235	0.0141926	NA			ort009445	516.025	-4.4556	1.83801	-2.42415
ort007293	778.923	-6.14784	2.29139	-2.68302	0.00729614	NA			ort009668	921.708	3.22953	1.40066	2.30573	0.0211259	0.93343			ort008249	414.492	-4.04628	1.73242	-2.33561	0.0195113	0.792391			ort000605	95.9028	-7.55919	3.08625	-2.44931	0.014313	NA			ort002254	643.388	4.37657	1.7869	2.44926	0.0143151	0.475301			ort010422	316.296	-4.79842	1.98051	-2.42282
ort001992	119.353	-6.64004	2.4765	-2.68121	0.00733554	NA			ort008187	772.778	3.29716	1.43101	2.30408	0.0212184	0.93343			ort001592	51.3502	9.33138	4.01002	2.32701	0.0199645	NA			ort006547	954.914	4.38912	1.7944	2.44601	0.0144449	0.487613			ort001239	560.528	-4.44934	1.81706	-2.44865	0.0143391	0.475301			ort006742	305.722	-4.82425	1.99214	-2.42164
ort008224	119.353	-6.64004	2.4765	-2.68121	0.00733554	NA			ort010339	66.745	6.96889	3.02639	2.30271	0.0212953	0.93343			ort010304	1169.34	-3.43988	1.47961	-2.32485	0.02008	0.810157			ort008515	12101	4.05423	1.65803	2.44521	0.0144767	0.487613			ort000229	63.6875	-9.46261	3.86711	-2.44695	0.0144072	NA			ort011600	82.7452	7.49638	3.09618	2.42117
ort005091	120.337	8.79077	3.27952	2.68051	0.00735104	NA			ort002518	483.182	3.52636	1.53548	2.29658	0.0216426	0.94101			ort005620	50.7732	9.31508	4.01666	2.31911	0.0203892	NA			ort003881	108.72	6.76783	2.76941	2.44378	0.0145343	NA			ort005868	63.6875	-9.46261	3.86711	-2.44695	0.0144072	NA			ort008249	588.862	-4.35526	1.80341	-2.41502
ort002595	5734.52	-6.06093	2.26296	-2.67832	0.00739925	0.0623936			ort010084	138.609	4.81439	2.09847	2.29423	0.0217772	0.94101			ort008312	4420.89	3.14696	1.35733	2.3185	0.0204222	0.813784			ort002706	93.558	7.55666	3.09546	2.44121	0.0146382	NA			ort008126	150.732	5.86214	2.39618	2.44645	0.0144271	0.475804			ort002124	341.639	-4.70462	1.94864	-2.41432
ort002181	17568	-6.0436	2.25919	-2.67512	0.00747026	0.0623936			ort008277	65.799	6.94813	3.03128	2.29214	0.0218975	0.94101			ort001115	82.2192	6.55263	2.82669	2.31813	0.0204422	NA			ort000717	348.23	-4.92099	2.01675	-2.44006	0.0146848	0.49183			ort002057	918.804	-4.16302	1.71206	-2.43158	0.0150331	0.493297			ort001539	1420.7	4.03707	1.673	2.41307
ort001548	197.346	-6.36251	2.38243	-2.67059	0.00757174	NA			ort002377	2618.73	-2.92803	1.27972	-2.28803	0.0221358	0.94101			ort002769	1039.67	3.4512	1.49128	2.31426	0.0206533	0.813784			ort010997	1073.76	-4.32331	1.77376	-2.43737	0.0147946	0.49183			ort008566	2746.17	-3.88846	1.602	-2.42725	0.0152137	0.495693			ort011607	1389.8	4.03801	1.67435	2.41168
ort010984	69.9314	-7.09508	2.65769	-2.66965	0.00759309	NA			ort001592	44.4596	8.8368	3.86796	2.28461	0.0223355	0.94101			ort006726	383.296	-4.04282	1.74711	-2.31401	0.0206672	0.813784			ort000952	216.612	-5.38632	2.21076	-2.43641	0.0148337	0.49183			ort009664	672.298	-4.28166	1.76476	-2.4262	0.0152579	0.495693			ort011665	171.997	-5.45244	2.26165	-2.41083
ort010850	47.4364	-8.12543	3.04387	-2.66944	0.00759779	NA			ort009521	956.54	3.1608	1.38406	2.28372	0.0223879	0.94101			ort005844	301.342	4.23804	1.83415	2.31063	0.0208532	0.813784			ort010850	65.7399	-9.46463	3.88497	-2.43622	0.0148417	NA			ort000624	62.316	9.37691	3.87162	2.42196	0.0154371	NA			ort006756	329.942	4.69016	1.94977	2.4055
ort004264	206.378	-6.32711	2.37447	-2.66464	0.00770709	NA			ort005761	626.611	-3.34097	1.46336	-2.28309	0.022425	0.94101			ort007789	199.497	4.70503	2.03639	2.31048	0.0208616	0.813784			ort007388	1123.59	4.29757	1.76581	2.43376	0.0149429	0.492884			ort007320	2559.98	3.88272	1.6033	2.4217	0.0154483	0.498901			ort007070	205.086	-5.18518	2.15645	-2.4045
ort006304	1917.98	-6.03688	2.26683	-2.66314	0.0077416	0.0633937			ort004505	471.738	-3.49994	1.53373	-2.28198	0.0224908	0.94101			ort004631	106.156	-5.91474	2.56035	-2.31013	0.0208809	NA			ort006589	64.74	9.4757	3.89535	2.43257	0.0149922	NA			ort004819	2709.97	-3.86367	1.59792	-2.41794	0.0156085	0.498901			ort007625	653.953	-4.26332	1.77499	-2.40189
ort004515	126.907	-6.53486	2.45402	-2.66292	0.00774657	NA			ort003316	1054.87	-3.1135	1.36638	-2.27864	0.0226883	0.94101			ort007555	609.192	3.69155	1.59898	2.30869	0.0209609	0.813784			ort000033	65.2456	-9.45374	3.88809	-2.43146	0.0150381	NA			ort008142	282.925	-4.87512	2.01671	-2.41736	0.0156335	0.498901			ort003343	246.471	-4.95839	2.06557	-2.4005
ort004464	10392	-5.99778	2.25548	-2.6592	0.00783258	0.0633937			ort002273	64.3801	6.91642	3.03887	2.27599	0.0228468	0.94101			ort006342	69.6695	7.31995	3.17373	2.30642	0.0210873	NA			ort005501	163.298	5.75652	2.36873	2.43021	0.0150901	0.494405			ort004251	61.8253	9.3655	3.87551	2.41658	0.0156669	NA			ort002718	504.269	-4.38441	1.82843	-2.39791
ort009081	15434.9	-5.99368	2.25453	-2.65851	0.00784874	0.0633937			ort003074	64.3801	6.91642	3.03887	2.27599	0.0228468	0.94101			ort010703	55.4623	-9.02939	3.91747	-2.3049	0.021172	NA			ort005999	255.258	5.16538	2.12663	2.42891	0.0151444	0.494405			ort010531	61.8253	9.3655	3.87551	2.41658	0.0156669	NA			ort011559	6115.19	3.81187	1.58986	2.39762
ort003269	401.448	-6.14717	2.31298	-2.65769	0.00786786	NA			ort003007	385.694	3.61673	1.59102	2.27322	0.023013	0.94101			ort002529	602.229	-3.69118	1.60182	-2.30436	0.0212023	0.81791			ort009483	123.112	-6.32432	2.60384	-2.42884	0.0151473	NA			ort009910	186.817	-5.36815	2.22216	-2.41574	0.0157035	0.498901			ort010969	55.4083	9.36837	3.90939	2.39638
ort001463	45.9593	-8.07963	3.04734	-2.65137	0.00801648	NA			ort005096	460.368	3.49405	1.53714	2.27309	0.023021	0.94101			ort005662	101.549	5.84773	2.53944	2.30276	0.0212923	NA			ort009303	247.292	-5.19413	2.1403	-2.42682	0.0152319	0.494727			ort007782	84388.8	-13.5837	5.62493	-2.41492	0.0157387	0.498901			ort000281	8404.43	-3.78975	1.58227	-2.39513
ort004717	45.9593	-8.07963	3.04734	-2.65137	0.00801648	NA			ort003596	342.153	3.70842	1.63153	2.27298	0.0230276	0.94101			ort007782	57036.6	-12.3442	5.36293	-2.30177	0.021348	0.81791			ort004798	3565.91	-4.05915	1.67461	-2.42394	0.015353	0.496127			ort002291	115.6	-6.27664	2.59971	-2.41436	0.0157629	NA			ort010652	590.964	-4.27237	1.78812	-2.38931
ort003934	118910	-5.95885	2.25017	-2.64817	0.00809278	0.0646543			ort005087	89.6345	-5.53532	2.43681	-2.27154	0.0231144	0.94101			ort007485	376.357	4.0028	1.74057	2.29971	0.0214647	0.81791			ort006851	90.5233	7.50883	3.10233	2.42038	0.0155043	NA			ort010066	807.272	4.15885	1.72356	2.41294	0.0158246	0.499201			ort000888	7357.62	3.75695	1.57744	2.38167
ort009373	1084.53	-6.00861	2.27116	-2.64561	0.00815441	NA			ort002124	217.967	-4.12378	1.81592	-2.2709	0.0231531	0.94101			ort008126	127.081	5.35395	2.33043	2.29741	0.0215955	NA			ort004106	63.2226	9.44148	3.90537	2.41757	0.0156247	NA			ort006726	466.421	-4.4351	1.84159	-2.40829	0.0160272	0.501819			ort007986	58.3307	-9.17489	3.85384	-2.38071
ort003802	66.9772	-7.03235	2.65951	-2.64422	0.00818785	NA			ort003685	270.429	3.90575	1.72071	2.26985	0.023217	0.94101			ort010066	718.256	3.56681	1.55298	2.29675	0.0216332	0.819275			ort008636	4926.1	3.9902	1.6553	2.41056	0.015928	0.512109			ort000888	8081.13	3.74058	1.55371	2.40752	0.0160613	0.501819			ort006458	304.997	-4.67093	1.96524	-2.37677
ort005578	13341.6	-5.93461	2.249	-2.63877	0.00832063	0.0657598			ort007115	41.757	-8.90663	3.92465	-2.26941	0.0232434	0.94101			ort004834	174.323	-4.86853	2.12225	-2.29404	0.0217882	NA			ort005761	512.068	-4.53013	1.88409	-2.40441	0.0161985	0.51819			ort000882	360.684	4.60185	1.91677	2.40084	0.0163576	0.505649			ort000121	53.7625	9.32487	3.92448	2.37608
ort009760	1266.81	-5.95175	2.26322	-2.62977	0.00854416	NA			ort005526	43.5137	8.80577	3.88102	2.26893	0.0232724	0.94101			ort011665	126.375	-5.41971	2.36458	-2.29204	0.0219033	NA			ort000095	88.4885	-7.44246	3.1028	-2.39863	0.0164565	NA			ort008268	383.561	-4.55013	1.89543	-2.40058	0.0163689	0.505649			ort005415	56.9635	-9.14067	3.86513	-2.3649
ort008084	106.797	8.61856	3.27808	2.62915	0.00855991	NA			ort000625	179.242	-4.32577	1.91236	-2.262	0.0236972	0.94101			ort005075	90.1531	6.09492	2.66004	2.29129	0.0219469	NA			ort011483	189.059	5.37498	2.24684	2.39224	0.0167461	0.533028			ort007692	899.802	4.07372	1.69812	2.39896	0.0164416	0.505649			ort005440	1218.47	3.92645	1.66152	2.36317
ort006334	418.373	-6.04014	2.30006	-2.62608	0.00863748	NA			ort000689	1322.23	3.00554	1.32883	2.26179	0.0237105	0.94101			ort004060	90.8469	-6.28029	2.7415	-2.29083	0.0219735	NA			ort009130	306.768	4.8356	2.02499	2.38796	0.0169421	0.536586			ort000400	113.053	-6.24407	2.604	-2.39788	0.0164904	NA			ort003494	75.6134	7.36559	3.12051	2.36038
ort011638	3458.46	-5.90675	2.25005	-2.62517	0.00866064	0.066901			ort005534	144.69	-4.61425	2.04061	-2.26121	0.0237463	0.94101			ort007343	1156.19	-3.34978	1.46237	-2.29065	0.0219836	0.827467			ort007294	129.549	-5.978	2.50493	-2.38649	0.01701	NA			ort004395	382.032	-4.54413	1.89512	-2.39781	0.0164936	0.505649			ort004203	409.194	-4.38802	1.8602	-2.3589
ort006896	365.828	-6.05621	2.30774	-2.6243	0.00868276	NA			ort010054	736.304	-3.20816	1.41886	-2.26108	0.0237544	0.94101			ort011483	194.304	4.66551	2.03761	2.2897	0.0220389	NA			ort003411	314.849	4.80495	2.01408	2.38567	0.0170479	0.537261			ort005306	299.682	-4.74205	1.97999	-2.39499	0.016621	0.507172			ort010464	52.1167	9.28002	3.94022	2.3552
ort000910	5363.4	-5.89416	2.24703	-2.62309	0.00871354	0.066901			ort010464	43.0407	8.79	3.88773	2.26096	0.0237618	0.94101			ort005868	54.1624	-8.99517	3.9306	-2.2885	0.0221085	NA			ort005440	1467.86	4.05067	1.70342	2.37797	0.0174084	0.54592			ort003897	84.5582	-7.42053	3.1027	-2.39163	0.0167735	NA			ort000087	525.426	-4.21302	1.79203	-2.35098
ort007734	2951.24	-5.89586	2.24985	-2.62056	0.00877866	0.066901			ort001067	62.9612	6.884	3.04676	2.25945	0.0238554	0.94101			ort010527	48.4654	9.24796	4.04457	2.28651	0.0222244	NA			ort008152	58.6706	9.33368	3.93808	2.37011	0.017783	NA			ort011665	169.513	-5.39856	2.26149	-2.38717	0.0169787	0.512984			ort001748	662.443	-4.08936	1.74205	-2.34744
ort006893	453.023	-6.00633	2.29339	-2.61897	0.00881962	NA			ort005708	234.658	-4.00968	1.77473	-2.25931	0.0238639	0.94101			ort010054	809.17	-3.47118	1.52099	-2.28219	0.0224783	0.84096			ort004135	58.1648	9.32118	3.94204	2.36456	0.0180515	NA			ort008312	10254.8	3.67114	1.53849	2.3862	0.0170236	0.512984			ort001239	545.756	-4.18037	1.7812	-2.34694
ort008636	2491.14	5.94164	2.26901	2.6186	0.00882912	0.066901			ort011499	366.664	3.59556	1.59671	2.25186	0.0243314	0.955755			ort001967	608.146	-3.60588	1.58361	-2.27701	0.0227858	0.84548			ort008849	137.469	-5.7376	2.43016	-2.361	0.0182258	NA			ort000605	147.642	-5.61904	2.35531	-2.38569	0.0170471	0.512984			ort001721	1345.89	-3.85095	1.6422	-2.345
ort011398	74.5319	-6.76932	2.58853	-2.61512	0.00891951	NA			ort011432	14910.9	-2.7153	1.20723	-2.24921	0.0244994	0.957639			ort004702	170.423	-4.83476	2.12402	-2.27623	0.0228323	NA			ort005769	135.492	5.75013	2.43675	2.35975	0.0182871	NA			ort009033	58.8812	9.29511	3.90008	2.38331	0.0171576	NA			ort011007	80.7533	-7.1917	3.07	-2.34257
ort002892	14891.2	-5.86209	2.24182	-2.61488	0.008926	0.066945			ort007226	268.119	3.84512	1.71167	2.24641	0.0246777	0.957639			ort001728	282.446	4.18364	1.83975	2.27403	0.0229644	0.84548			ort001538	81.925	7.36401	3.12446	2.35689	0.0184286	NA			ort006846	1598.9	-3.84502	1.61649	-2.37863	0.0173772	0.518633			ort005780	51.0195	9.24932	3.95138	2.34078
ort003005	102.735	8.56262	3.27794	2.6122	0.00899627	NA			ort007972	191.232	-4.19005	1.86704	-2.24422	0.0248183	0.957639			ort011339	130.976	5.20101	2.28762	2.27355	0.0229932	NA			ort010733	134.48	5.73912	2.43745	2.35456	0.0185449	NA			ort003560	1637.51	-3.83877	1.6141	-2.37828	0.0173937	0.518633			ort000329	196.976	-4.9837	2.13119	-2.33846
ort003348	184.222	-6.1611	2.36623	-2.60377	0.00922058	NA			ort007001	61.5423	6.85083	3.05498	2.24252	0.024928	0.957639			ort008142	216.782	-4.49072	1.97663	-2.27191	0.0230919	0.84548			ort003233	602.707	4.27221	1.81543	2.35328	0.0186088	0.580705			ort002222	58.3905	9.28304	3.90439	2.37759	0.0174262	NA			ort006356	216.302	-4.87424	2.08449	-2.33833
ort008693	100.704	8.53381	3.27775	2.60355	0.00922627	NA			ort009102	40.1713	-8.85078	3.94947	-2.241	0.025026	0.957639			ort009102	52.8625	-8.96012	3.94428	-2.27167	0.0231062	NA			ort011339	108.708	6.17609	2.62583	2.35205	0.0186703	NA			ort011295	156.285	-5.47572	2.30596	-2.3746	0.0175681	0.521281			ort008558	79.8418	-7.17521	3.07298	-2.33494
ort001269	62.5459	-6.93281	2.66297	-2.60342	0.00922992	NA			ort009123	224.143	-3.9932	1.78432	-2.23794	0.0252249	0.957639			ort000107	318.596	-4.07144	1.79279	-2.271	0.0231469	0.84548			ort008001	95.9143	-6.55172	2.78636	-2.35135	0.0187054	NA			ort002706	83.9246	7.35501	3.09837	2.37383	0.0176047	NA			ort000095	131.708	-5.55504	2.38204	-2.33206
ort004851	100.535	8.53139	3.27776	2.60281	0.00924628	NA			ort001808	387.335	3.51353	1.57089	2.23665	0.0253095	0.957639			ort011536	66.2077	7.24594	3.19157	2.27034	0.023187	NA			ort009397	95.9143	-6.55172	2.78636	-2.35135	0.0187054	NA			ort000107	564.435	-4.20919	1.77375	-2.37304	0.0176421	0.521281			ort005193	131.708	-5.55504	2.38204	-2.33206
ort011538	377.291	6.39473	2.45833	2.60125	0.00928847	NA			ort008249	307.657	-3.68254	1.64839	-2.23403	0.0254814	0.957639			ort007947	77.0265	6.45748	2.84608	2.2689	0.0232743	NA			ort008312	5554.39	3.79328	1.61505	2.34871	0.0188385	0.581763			ort003468	57.8999	9.27086	3.90877	2.37181	0.017701	NA			ort009550	106.459	-5.99283	2.57222	-2.32983
ort004520	1498.39	-5.83899	2.24984	-2.5953	0.00945087	NA			ort001873	834.569	3.08943	1.38296	2.23392	0.0254886	0.957639			ort010733	114.532	5.42806	2.3931	2.26821	0.0233162	NA			ort011612	1112.22	4.01586	1.71273	2.34471	0.0190417	0.581763			ort001967	712.795	-4.08185	1.72256	-2.36965	0.0178051	0.523726			ort007420	349.488	-4.39005	1.88787	-2.32541
ort001152	18520.6	-5.7972	2.23515	-2.59366	0.00949616	0.0704173			ort005450	728.123	3.14397	1.40797	2.23298	0.0255503	0.957639			ort001992	141.828	-5.09235	2.24698	-2.26631	0.0234323	NA			ort001857	196.117	5.13214	2.18937	2.34412	0.0190721	0.581763			ort006351	1801.39	3.773	1.59735	2.36204	0.0181745	0.532196			ort003458	1045.5	3.84775	1.65696	2.32217
ort002675	218.872	-6.06737	2.34093	-2.59186	0.00954582	NA			ort003512	2618.97	2.79767	1.25372	2.23149	0.0256486	0.957639			ort005224	232.388	4.35423	1.92433	2.26272	0.0236529	0.854984			ort002460	623.398	4.22546	1.80275	2.34389	0.0190836	0.581763			ort000121	56.9185	9.2462	3.91772	2.3601	0.0182702	NA			ort010082	95.7257	6.1089	2.6309	2.32199
ort003772	71.5777	-6.71043	2.58977	-2.59113	0.0095661	NA			ort004082	310.773	-3.66546	1.643	-2.23096	0.025684	0.957639			ort004423	980.82	3.32798	1.47175	2.26124	0.0237442	0.854984			ort003753	1066.09	-4.02475	1.71735	-2.34358	0.0190997	0.581763			ort008320	56.045	-9.27818	3.93207	-2.35962	0.0182936	NA			ort002564	12782	-12.9222	5.56756	-2.32099
ort004056	71.5777	-6.71043	2.58977	-2.59113	0.0095661	NA			ort007602	384.025	3.50006	1.56996	2.2294	0.0257875	0.957639			ort011144	86.6913	6.03758	2.67024	2.26106	0.0237553	NA			ort003841	56.3485	-9.24223	3.95262	-2.33825	0.0193741	NA			ort006680	411.961	-4.35946	1.8489	-2.35787	0.0183799	0.535807			ort003650	417.313	-4.24928	1.83188	-2.31963
ort002008	21228.1	-5.78768	2.2341	-2.59061	0.00958058	0.0704173			ort003831	127.358	-4.69635	2.10666	-2.22928	0.0257951	0.957639			ort000033	51.9959	-8.93628	3.95346	-2.26037	0.0237983	NA			ort003493	305.733	-4.65998	1.99314	-2.33801	0.0193867	0.585707			ort005761	417.037	-4.33968	1.84325	-2.35436	0.0185545	0.536917			ort005761	500.911	-4.10946	1.77946	-2.30939
ort000078	23.6336	-9.56807	3.6941	-2.5901	0.00959488	NA			ort007625	528.602	-3.28483	1.47567	-2.226	0.0260143	0.957639			ort000666	352.845	3.93418	1.7408	2.25998	0.0238227	0.854984			ort008450	1960.52	3.86944	1.65538	2.3375	0.0194131	0.585707			ort005066	313.363	-4.55841	1.9377	-2.35248	0.0186485	0.536917			ort001699	9074.25	-13.0129	5.63508	-2.30927
ort010593	23.6336	-9.56807	3.6941	-2.5901	0.00959488	NA			ort005830	513.496	-3.30109	1.48303	-2.22591	0.0260203	0.957639			ort000087	298.81	-4.07538	1.8088	-2.25308	0.024254	0.864769			ort005781	132.032	-5.67827	2.43372	-2.33316	0.0196396	NA			ort009483	151.699	-5.43178	2.30927	-2.35216	0.0186646	0.536917			ort001967	872.586	-3.86727	1.67501	-2.3088
ort009923	224.55	7.23855	2.79561	2.58926	0.00961834	NA			ort001593	89.6146	5.37103	2.41332	2.22558	0.0260425	0.957639			ort010984	73.8045	-6.98766	3.10237	-2.25236	0.0242996	NA			ort008249	344.839	-4.5453	1.94845	-2.33277	0.01966	0.588188			ort005929	6822.09	3.58798	1.52732	2.34919	0.0188141	0.538842			ort001818	11403.4	3.53526	1.53165	2.30814
ort006981	61.0688	-6.89805	2.66434	-2.58903	0.00962468	NA			ort001721	1315.46	-2.91291	1.3107	-2.22241	0.0262555	0.957639			ort004066	328.993	-3.97916	1.76761	-2.25116	0.0243755	0.864769			ort006475	55.8542	-9.22952	3.95675	-2.3326	0.019669	NA			ort001089	55.9372	9.22111	3.92696	2.34816	0.0188666	NA			ort001520	232.986	-4.67484	2.02824	-2.30487
ort004398	12305.7	-5.76928	2.23289	-2.58378	0.00977252	0.0707659			ort008001	181.245	-4.18267	1.88279	-2.22153	0.026315	0.957639			ort003027	73.3712	-6.97909	3.10427	-2.24823	0.0245618	NA			ort007165	943.349	-4.02409	1.72602	-2.33143	0.0197306	0.588188			ort006989	55.026	-9.25171	3.94194	-2.34699	0.0189256	NA			ort003358	1161.03	3.76114	1.63377	2.30213
ort001279	80.6095	-6.55843	2.53922	-2.58285	0.00979881	NA			ort000417	230.421	3.92083	1.76505	2.22137	0.0263256	0.957639			ort010531	45.5805	9.15943	4.08263	2.24351	0.0248638	NA			ort003027	92.9486	-6.50591	2.79233	-2.32992	0.0198103	NA			ort000329	206.612	-4.97221	2.11895	-2.34655	0.0189481	0.540311			ort009622	314.12	-4.39384	1.90908	-2.30155
ort004926	1571.32	-5.79721	2.24517	-2.58208	0.00982057	0.0707659			ort001857	225.162	3.94336	1.77559	2.22087	0.0263596	0.957639			ort004056	85.214	-6.18671	2.75847	-2.24281	0.0249093	NA			ort010468	55.3599	-9.2167	3.96094	-2.3269	0.0199708	NA			ort009898	1129.81	3.83724	1.63674	2.34444	0.0190559	0.541022			ort004622	81.0065	6.45741	2.80903	2.29881
ort009220	1419.6	-5.78895	2.24551	-2.57801	0.00993722	NA			ort006087	40.6758	8.70847	3.92334	2.21965	0.0264422	0.957639			ort005236	50.2627	-8.88737	3.97331	-2.23677	0.0253015	NA			ort003034	24519.3	3.67488	1.58057	2.32504	0.0200699	0.588188			ort001818	11346.2	3.54352	1.51371	2.34094	0.0192352	0.543749			ort008312	10020.3	3.50854	1.52747	2.29695
ort003643	1246.69	-5.78728	2.24702	-2.57553	0.0100085	NA			ort002987	368.778	3.49059	1.57587	2.21502	0.0267587	0.965677			ort006628	50.2627	-8.88737	3.97331	-2.23677	0.0253015	NA			ort000111	54.6243	9.23058	3.9714	2.32426	0.0201114	NA			ort007765	54.5165	-9.23829	3.947	-2.34058	0.0192537	NA			ort001390	47.7279	9.1531	3.9876	2.29539
ort005459	59.5917	-6.86243	2.66584	-2.57421	0.0100469	NA			ort006302	40.2028	8.6916	3.9309	2.21109	0.0270293	0.968599			ort009622	267.038	-4.13034	1.8479	-2.23515	0.0254074	0.895038			ort006302	54.6243	9.23058	3.9714	2.32426	0.0201114	NA			ort003358	1301.12	3.77363	1.61539	2.33604	0.0194889	0.548546			ort003380	10362.2	-12.6194	5.5047	-2.29249
ort001936	40.0509	-7.88032	3.06465	-2.57136	0.01013	NA			ort010808	40.2028	8.6916	3.9309	2.21109	0.0270293	0.968599			ort011055	45.0036	9.14105	4.09082	2.23453	0.0254483	NA			ort005376	448.799	-4.33104	1.8648	-2.32253	0.0202046	0.588188			ort001721	1286.69	-3.77076	1.61549	-2.33412	0.0195894	0.549008			ort000034	51.0393	-8.98224	3.92023	-2.29125
ort006654	9115.86	-5.72551	2.22908	-2.56856	0.0102123	0.0728745			ort005090	400.912	3.41535	1.546	2.20915	0.0271642	0.970028			ort005193	161.324	-4.75274	2.12853	-2.23288	0.0255569	NA			ort009622	238.429	-4.83098	2.08067	-2.32184	0.0202418	0.588188			ort004862	54.007	-9.22474	3.95215	-2.33411	0.0195901	NA			ort002430	10088.5	-3.49099	1.52409	-2.29055
ort003076	5423.53	-5.71163	2.22899	-2.56244	0.0103941	0.0733925			ort008328	39.7299	8.67452	3.93862	2.20243	0.0276351	0.973905			ort010422	272.381	-4.10072	1.83699	-2.2323	0.0255948	0.895038			ort000355	1443.89	3.87825	1.67074	2.32129	0.0202714	0.588188			ort007165	1478.66	-3.72404	1.59843	-2.32981	0.0198161	0.552988			ort004264	112.932	-5.65712	2.47074	-2.28964
ort008106	6300.47	-5.70115	2.22752	-2.55942	0.0104846	0.0733925			ort004950	78.2076	5.59453	2.54087	2.20182	0.0276783	0.973905			ort003753	1296.11	-3.15316	1.41317	-2.23126	0.0256636	0.895038			ort008692	1510.54	3.86709	1.66628	2.3208	0.0202978	0.588188			ort009102	53.4975	-9.21107	3.95739	-2.32756	0.0199353	NA			ort010066	929.67	3.78482	1.65386	2.28848
ort003567	2570.15	-5.69279	2.2306	-2.55214	0.0107065	0.0734594			ort010159	58.2315	6.77034	3.07554	2.20135	0.0277113	0.973905			ort007051	44.4266	9.12243	4.09918	2.22543	0.0260525	NA			ort000087	237.935	-4.82788	2.08059	-2.32043	0.0203174	0.588188			ort007516	53.9744	9.16958	3.94633	2.32357	0.0201484	NA			ort006351	1581.41	3.65026	1.59576	2.28747
ort006943	47.6056	-7.12545	2.79437	-2.54993	0.0107744	NA			ort007765	38.057	-8.77278	3.98535	-2.20126	0.027718	0.973905			ort004629	182.12	-4.54103	2.04331	-2.22239	0.0262567	NA			ort011607	1427.73	3.87757	1.67118	2.32026	0.020327	0.588188			ort010562	53.9744	9.16958	3.94633	2.32357	0.0201484	NA			ort008572	1839.28	3.62298	1.58387	2.28742
ort003886	20029.4	-5.66578	2.22218	-2.54965	0.0107832	0.0734594			ort011665	123.129	-4.64572	2.11146	-2.20024	0.0277897	0.973905			ort006268	71.8337	6.3556	2.86827	2.21583	0.0267033	NA			ort001509	103.651	6.10638	2.63327	2.31893	0.0203987	NA			ort002692	213.217	4.85257	2.08917	2.32273	0.0201938	0.561131			ort001692	201.263	-4.7666	2.08486	-2.28629
ort007302	159830	-5.6598	2.22085	-2.54848	0.0108194	0.0734594			ort002529	501.283	-3.24694	1.47624	-2.19946	0.0278449	0.973905			ort003708	48.5295	-8.83674	3.99435	-2.21231	0.0269451	NA			ort004380	78.1086	-7.26135	3.13157	-2.31876	0.0204081	NA			ort001586	522.146	-4.0905	1.7632	-2.31994	0.0203443	0.562917			ort006075	454.968	-4.08989	1.78943	-2.28558
ort000606	160428	-5.64423	2.21932	-2.54323	0.0109834	0.0734594			ort003665	191.303	4.02099	1.83814	2.18753	0.0287036	0.99619			ort005708	187.03	-4.46948	2.02031	-2.21227	0.026948	NA			ort005780	54.1186	9.21716	3.97587	2.31827	0.0204344	NA			ort005490	134.395	-5.48052	2.36778	-2.31462	0.0206337	0.568515			ort010512	243.728	4.5429	1.98906	2.28395
ort005075	87.6719	8.33388	3.27903	2.54156	0.0110358	NA			ort010984	72.7758	-5.65213	2.58517	-2.18636	0.0287892	0.99619			ort001636	310.291	3.89855	1.76249	2.21196	0.0269697	0.932236			ort008025	4762.94	15.6761	6.76645	2.31674	0.0205177	0.590564			ort003500	180.156	-5.0169	2.17071	-2.31118	0.020823	0.57132			ort000959	186.868	4.82221	2.11138	2.28391
ort009231	65.6693	-6.5849	2.59316	-2.53933	0.0111065	NA			ort000988	3736.14	2.64893	1.21287	2.18403	0.02896	0.99619			ort002493	1907.45	2.99711	1.35616	2.21	0.0271049	0.932236			ort010512	241.062	4.79118	2.06989	2.31471	0.0206288	0.590564			ort007455	52.5024	9.12968	3.9617	2.30449	0.0211954	NA			ort011673	79.3607	6.42746	2.81435	2.28381
ort009474	7333.58	-5.63619	2.22072	-2.538	0.0111487	0.0734594			ort003086	725.48	3.00537	1.38122	2.17587	0.0295647	0.99619			ort007602	452.389	3.59105	1.62573	2.20888	0.0271833	0.932236			ort008187	966.202	3.96029	1.71171	2.31364	0.0206874	0.590564			ort004550	892.309	3.79097	1.64727	2.30136	0.0213714	0.58119			ort000015	144.198	-5.19175	2.27485	-2.28224
ort005071	11020.6	-5.61722	2.21807	-2.53248	0.0113259	0.0734594			ort000524	389.67	-3.34103	1.53639	-2.1746	0.0296602	0.99619			ort002208	81.3143	-6.11818	2.77166	-2.20741	0.0272856	NA			ort005305	53.6128	9.20361	3.98042	2.31222	0.0207654	NA			ort005255	373.258	-4.2493	1.84709	-2.30053	0.0214179	0.58119			ort000107	508.574	-4.015	1.75997	-2.28128
ort001449	46.1285	-7.07965	2.79763	-2.53059	0.011387	NA			ort001268	814.314	2.95483	1.35892	2.17439	0.0296757	0.99619			ort005995	48.0962	-8.8238	3.9998	-2.20606	0.0273799	NA			ort006351	1703.35	3.80561	1.64857	2.30843	0.020975	0.595915			ort005731	283.572	4.47186	1.94553	2.29853	0.0215317	0.58119			ort004816	471.25	4.04677	1.77498	2.27989
ort008373	85.4717	8.29721	3.27953	2.53	0.0114064	NA			ort004953	1564.97	2.75938	1.26931	2.17392	0.0297113	0.99619			ort000382	291.298	-3.93414	1.78761	-2.20079	0.027751	0.943478			ort000925	6996.57	3.64611	1.58283	2.30354	0.0212484	0.595915			ort001748	549.528	-3.99715	1.7391	-2.29841	0.0215387	0.58119			ort004819	2163.32	-3.57639	1.56899	-2.27942
ort001888	3322.04	-5.61299	2.22119	-2.52703	0.0115033	0.0734594			ort010420	265.65	-3.62908	1.67264	-2.16967	0.0300316	0.99619			ort002124	217.213	-4.23373	1.92642	-2.19771	0.0279695	0.943478			ort004423	1001.52	3.91465	1.70016	2.30252	0.0213058	0.595915			ort010703	50.95	-9.14068	3.98473	-2.29393	0.0217948	NA			ort005433	122.139	-5.44381	2.3916	-2.27622
ort002010	37.0967	-7.76929	3.07586	-2.52589	0.0115406	NA			ort004106	37.838	8.60413	3.97115	2.16666	0.0302608	0.99619			ort010167	1534.81	-3.01415	1.37249	-2.19612	0.0280833	0.943478			ort004819	2146.11	-3.74763	1.62799	-2.30199	0.0213356	0.595915			ort005780	51.5211	9.10246	3.97217	2.29156	0.0219311	NA			ort002190	645.414	-3.87639	1.70543	-2.27297
ort009178	64.1922	-6.55173	2.59424	-2.52549	0.0115537	NA			ort007677	37.838	8.60413	3.97115	2.16666	0.0302608	0.99619			ort008515	6180.64	2.8083	1.27907	2.19557	0.0281225	0.943478			ort000099	5281.44	3.65667	1.58857	2.30186	0.0213429	0.595915			ort009923	410.525	4.14878	1.81206	2.28953	0.0220484	0.58846			ort003155	49.6722	-8.94307	3.93468	-2.27288
ort009200	155345	-5.5887	2.21383	-2.52445	0.011588	0.0734594			ort010399	37.838	8.60413	3.97115	2.16666	0.0302608	0.99619			ort007388	1052.54	3.11093	1.42062	2.18984	0.0285356	0.952163			ort001721	947.395	-3.921	1.70556	-2.29895	0.021508	0.597318			ort005087	85.5584	-6.42927	2.80822	-2.28945	0.0220533	NA			ort008142	329.074	-4.24751	1.87304	-2.26771
ort010795	625.012	-5.6727	2.24897	-2.52235	0.0116573	NA			ort011032	106.326	-4.7602	2.19846	-2.16524	0.0303693	0.99619			ort002383	683.518	-3.2883	1.50386	-2.18657	0.0287742	0.954964			ort010420	311.204	-4.50237	1.95954	-2.29767	0.0215808	0.597318			ort000372	265.38	4.50306	1.96714	2.28914	0.0220713	0.58846			ort005868	97.8002	-5.86844	2.58792	-2.26762
ort001489	2065.09	-5.6088	2.22384	-2.52212	0.0116649	0.0734594			ort000627	65.3817	5.92709	2.7384	2.16444	0.0304309	0.99619			ort004106	58.7071	7.07127	3.23648	2.18486	0.0288989	NA			ort006129	74.3383	7.22292	3.14838	2.29417	0.0217808	NA			ort008506	198.951	-4.80534	2.10049	-2.28772	0.0221536	0.58846			ort009732	97.8002	-5.86844	2.58792	-2.26762
ort004128	141.047	-5.97962	2.37401	-2.51878	0.0117761	NA			ort005639	1355.33	2.76925	1.28005	2.1634	0.0305104	0.99619			ort006028	116.552	5.02782	2.30623	2.1801	0.0292497	NA			ort000121	51.5896	9.14812	3.9994	2.28737	0.0221742	NA			ort003831	119.638	-5.57782	2.43843	-2.28746	0.0221687	NA			ort011197	2490.54	3.52076	1.55342	2.26645
ort001529	1327.9	-5.61385	2.22885	-2.51873	0.011778	NA			ort007499	74.4238	5.52146	2.55541	2.16069	0.030719	0.99619			ort001457	2867.28	-12.278	5.63246	-2.17987	0.0292669	0.966122			ort005708	191.921	-4.93642	2.15879	-2.28666	0.0222157	0.609728			ort000717	372.73	-4.20767	1.83985	-2.28696	0.0221981	0.58846			ort008515	11499.7	3.40775	1.50692	2.2614
ort003975	795.648	-5.63071	2.23896	-2.51487	0.0119075	NA			ort010820	52.2728	-6.77495	3.13783	-2.15912	0.0308411	0.99619			ort008928	41.5417	9.02557	4.14377	2.17811	0.0293982	NA			ort000107	313.687	-4.45746	1.94941	-2.28657	0.0222207	0.609728			ort007050	51.0304	9.08866	3.97766	2.28493	0.0223171	NA			ort006920	129.978	-5.26629	2.33006	-2.26015
ort000484	222.503	-5.81137	2.31187	-2.51371	0.0119467	NA			ort005992	64.9087	5.91644	2.7409	2.15858	0.0308827	0.99619			ort009225	58.1302	7.05691	3.24034	2.17783	0.0294186	NA			ort005306	318.642	-4.42623	1.94039	-2.2811	0.0225423	0.615898			ort007486	51.0304	9.08866	3.97766	2.28493	0.0223171	NA			ort005999	341.445	4.1868	1.85276	2.25977
ort002642	43473	-5.55401	2.21066	-2.51237	0.0119922	0.0734594			ort005782	37.365	8.58598	3.97951	2.15755	0.0309632	0.99619			ort008832	3315.64	-2.82193	1.29662	-2.17638	0.029527	0.969524			ort001728	220.337	4.7474	2.08402	2.278	0.0227264	0.618275			ort008147	73.6203	7.16479	3.13809	2.28317	0.0224205	NA			ort003079	98.3758	5.72704	2.53471	2.25944
ort004947	11046.6	-5.55642	2.21203	-2.51191	0.012008	0.0734594			ort010933	37.365	8.58598	3.97951	2.15755	0.0309632	0.99619			ort010957	89.2573	-5.66006	2.60087	-2.17622	0.0295389	NA			ort000667	86.0286	-6.39302	2.80805	-2.27668	0.0228054	NA			ort006742	7232.61	3.40181	1.49115	2.28133	0.0225291	0.58846			ort006367	2357.71	-3.50908	1.55311	-2.2594
ort009648	81.9174	8.23593	3.28028	2.51074	0.0120479	NA			ort004622	117.325	4.56455	2.12186	2.1512	0.0314603	0.99619			ort005615	1383.17	-2.98402	1.37301	-2.17334	0.0297549	0.971836			ort002529	949.947	-3.83486	1.68835	-2.27137	0.0231248	0.625532			ort008107	255.057	4.51337	1.97897	2.28066	0.0225685	0.58846			ort003074	65.1901	7.15021	3.16501	2.25914
ort005727	314.16	6.12711	2.44044	2.51065	0.0120508	NA			ort001476	103.971	4.76022	2.21492	2.14916	0.0316215	0.99619			ort003839	273.506	3.88561	1.79053	2.17009	0.0300001	0.974689			ort007299	276.076	-4.50663	1.98504	-2.2703	0.0231897	0.625532			ort003519	853.017	3.7477	1.64334	2.28054	0.0225759	0.58846			ort004126	13646.3	3.37418	1.49928	2.25054
ort002952	1977.1	-5.57504	2.22082	-2.51035	0.0120611	0.0734594			ort000309	36.892	8.56761	3.98829	2.14819	0.0316988	0.99619			ort011327	133.739	-4.806	2.2149	-2.16985	0.0300186	NA			ort004622	108.191	5.74738	2.53248	2.26947	0.0232399	NA			ort000100	1367.92	3.60418	1.5806	2.28026	0.0225924	0.58846			ort000605	70.272	-6.98966	3.10861	-2.24849
ort008822	53.6833	-6.71042	2.67319	-2.51027	0.0120638	NA			ort003707	36.892	8.56761	3.98829	2.14819	0.0316988	0.99619			ort010159	40.9648	9.00539	4.15332	2.16824	0.0301406	NA			ort001022	50.0723	9.10505	4.01429	2.26816	0.0233194	NA			ort009445	400.658	-4.13401	1.81332	-2.27981	0.0226192	0.58846			ort007050	44.4363	9.05001	4.02856	2.24646
ort001846	2781.31	-5.56471	2.21735	-2.50962	0.012086	0.0734594			ort000776	156.971	4.13428	1.92544	2.14719	0.0317782	0.99619			ort006783	67.218	6.25857	2.89065	2.16511	0.0303795	NA			ort005782	50.0723	9.10505	4.01429	2.26816	0.0233194	NA			ort008025	4046.12	15.3971	6.76646	2.2755	0.0228757	0.592533			ort001593	96.1814	5.69387	2.53916	2.24242
ort000547	2327.23	-5.56725	2.21877	-2.50916	0.0121019	0.0734594			ort004227	225.385	3.72394	1.7346	2.14685	0.031805	0.99619			ort005090	488.027	3.40754	1.57604	2.16209	0.0306111	0.98933			ort001303	83.9366	6.39067	2.81805	2.26776	0.0233436	NA			ort008001	136.924	-5.28033	2.3219	-2.27415	0.0229572	0.592533			ort006083	273.799	4.30143	1.91825	2.24237
ort010686	276.864	-5.74215	2.28975	-2.50776	0.01215	NA			ort008692	1417.79	2.71747	1.26668	2.14534	0.0319253	0.99619			ort010339	40.3878	8.98492	4.16311	2.15822	0.0309104	NA			ort006276	383.508	-4.24439	1.87236	-2.26687	0.023398	0.628488			ort011027	48.912	-9.08178	4.00864	-2.26555	0.0234789	NA			ort010054	797.124	-3.69724	1.65077	-2.2397
ort010563	35.6196	-7.7104	3.08243	-2.5014	0.0123704	NA			ort005606	151.24	4.17594	1.9467	2.14513	0.0319421	0.99619			ort003596	252.156	3.92268	1.81902	2.15648	0.0310465	0.991263			ort000483	84.5458	-6.36763	2.81167	-2.26472	0.0235301	NA			ort006143	212.764	4.64958	2.05314	2.26462	0.0235358	0.603795			ort000482	126.333	-5.22417	2.33343	-2.23884
ort003578	76023.5	-5.51933	2.20705	-2.50077	0.0123922	0.0734594			ort006860	269.712	-3.54497	1.65316	-2.14436	0.0320038	0.99619			ort000161	44.6298	-8.71588	4.04651	-2.15393	0.0312459	NA			ort007516	70.7978	7.15204	3.16099	2.26259	0.0236607	NA			ort002430	10069.7	-3.34127	1.47599	-2.26376	0.023589	0.603795			ort009910	235.088	-4.42985	1.9809	-2.23628
ort002723	3126.55	-5.53495	2.21371	-2.50031	0.0124085	0.0734594			ort006671	146.581	-4.19922	1.95973	-2.14275	0.0321332	0.99619			ort006316	263.279	-3.88115	1.80293	-2.15269	0.0313428	0.991263			ort000299	49.9228	-9.06755	4.01171	-2.26027	0.0238045	NA			ort001214	5313.32	3.35752	1.48702	2.25788	0.0239532	0.603795			ort011025	122.235	5.22181	2.33567	2.23568
ort001791	1511.7	-5.54725	2.22062	-2.49807	0.0124873	NA			ort011339	115.906	4.54625	2.1238	2.14062	0.0323045	0.99619			ort002460	964.685	3.04231	1.41418	2.15129	0.0314531	0.991263			ort001214	4075.21	3.5513	1.57158	2.2597	0.0238396	0.63766			ort005227	145.882	5.1206	2.26822	2.25754	0.0239741	0.603795			ort008025	2970.65	15.1123	6.76647	2.23341
ort004744	2495.93	-5.53182	2.21474	-2.49773	0.0124991	0.0734594			ort005305	36.419	8.54899	3.99727	2.13871	0.0324594	0.99619			ort009397	86.2242	-5.60918	2.60981	-2.14927	0.0316132	NA			ort004837	95.0523	5.97955	2.64806	2.25808	0.0239404	NA			ort006075	529.619	-3.8946	1.72538	-2.25724	0.0239931	0.603795			ort007690	367.127	4.04556	1.81378	2.23047
ort010327	2746.71	-5.52474	2.21342	-2.49602	0.0125594	0.0734594			ort000604	80.628	5.21468	2.44065	2.13659	0.0326311	0.99619			ort000111	39.8108	8.96416	4.17314	2.14806	0.0317087	NA			ort005912	83.5572	-6.35046	2.81407	-2.25668	0.0240278	NA			ort003762	538.062	3.88382	1.7214	2.25619	0.0240586	0.603795			ort004504	80.8461	-6.1835	2.7729	-2.22998
ort000815	2766.42	-5.52252	2.21315	-2.49532	0.0125844	0.0734594			ort011118	114.144	-4.53185	2.12329	-2.13436	0.0328134	0.99619			ort010243	44.1965	-8.70181	4.0528	-2.14711	0.0317843	NA			ort001592	48.555	9.06065	4.03031	2.24813	0.0245681	NA			ort003207	1265.36	-3.55658	1.57642	-2.25611	0.0240635	0.603795			ort000170	3386.64	3.38799	1.51943	2.22978
ort010903	2697.12	-5.51941	2.21299	-2.49409	0.0126281	0.0734594			ort010422	243.088	-3.60623	1.69086	-2.13278	0.0329427	0.99619			ort011462	214.648	4.0611	1.89173	2.14676	0.031812	0.991263			ort010703	48.9342	-9.0387	4.0221	-2.24726	0.0246235	NA			ort008692	1582.76	3.50174	1.55288	2.255	0.0241333	0.603795			ort006851	43.3391	9.01394	4.04343	2.22928
ort010846	77.8246	-6.24095	2.50288	-2.4935	0.012649	NA			ort009241	289.653	3.44796	1.6189	2.12981	0.0331871	0.99619			ort000638	95.9005	-5.3417	2.48832	-2.14671	0.0318166	NA			ort003358	1003.86	3.73361	1.66403	2.24371	0.0248511	0.661932			ort009604	47.893	-9.05141	4.02127	-2.25088	0.0243929	NA			ort011135	92.7874	-5.7912	2.59865	-2.22854
ort007579	15649.1	-5.49695	2.20566	-2.49221	0.0126952	0.0734594			ort004245	350.082	3.30125	1.55002	2.12981	0.0331871	0.99619			ort000933	63.4053	-6.76668	3.15423	-2.14527	0.0319309	NA			ort002430	9336.17	-3.43931	1.53789	-2.23638	0.025327	0.671798			ort003388	3249.56	3.36856	1.49963	2.24627	0.024687	0.61529			ort007942	46.4822	-8.84731	3.97132	-2.2278
ort010752	181.221	6.92699	2.782	2.48993	0.0127769	NA			ort000355	1308.62	2.70096	1.26849	2.12928	0.0332315	0.99619			ort001873	672.978	3.17318	1.48122	2.14227	0.0321718	0.991263			ort005087	80.5915	-6.29767	2.82198	-2.23165	0.0256382	NA			ort006345	48.0863	9.00293	4.01264	2.24364	0.0248556	NA			ort009123	184.402	-4.63551	2.08638	-2.2218
ort009393	2425.83	-5.50884	2.21262	-2.48974	0.0127838	0.0734594			ort002574	2389.11	11.1412	5.23898	2.12659	0.0334542	0.99619			ort000050	85.3576	-5.5943	2.61263	-2.14125	0.0322536	NA			ort001476	149.608	5.02813	2.25478	2.22999	0.0257482	NA			ort010422	300.531	-4.22937	1.88793	-2.24021	0.0250771	0.620969			ort005595	79.9347	-6.16692	2.77577	-2.2217
ort005234	2067.97	-5.51201	2.21412	-2.48948	0.0127929	0.0734594			ort007606	178.06	3.91087	1.84066	2.12471	0.0336107	0.99619			ort003266	85.3576	-5.5943	2.61263	-2.14125	0.0322536	NA			ort011456	3123.2	15.0673	6.76646	2.22677	0.0259628	0.685667			ort009130	198.516	4.64241	2.07271	2.23978	0.025105	0.620969			ort007486	42.7905	8.99556	4.05084	2.22067
ort008605	43.1743	-6.98343	2.80546	-2.48923	0.0128019	NA			ort003339	245.583	3.57362	1.68326	2.12303	0.033751	0.99619			ort005859	43.7632	-8.68759	4.05919	-2.14023	0.0323364	NA			ort009737	67.7286	-7.0542	3.16866	-2.22624	0.0259981	NA			ort001593	81.49	6.3032	2.81444	2.23959	0.0251174	NA			ort010531	42.7905	8.99556	4.05084	2.22067
ort010890	77.3476	8.15312	3.28165	2.48446	0.0129749	NA			ort004423	952.587	2.77308	1.30765	2.12066	0.0339506	0.99619			ort011516	985.607	3.00476	1.40425	2.13976	0.0323746	0.991263			ort001692	299.87	-4.28125	1.9243	-2.22484	0.0260923	0.685667			ort010733	133.105	5.18271	2.31724	2.23658	0.0253135	0.62362			ort003205	150.764	-4.88433	2.19965	-2.2205
ort006487	1295.11	-5.51276	2.21897	-2.48438	0.0129777	NA			ort005780	35.4731	8.51102	4.01584	2.11936	0.03406	0.99619			ort002574	2106.8	11.2465	5.26235	2.13717	0.0325844	0.991263			ort007370	467.732	-3.9831	1.79126	-2.22364	0.026173	0.685667			ort003770	47.5956	8.98813	4.01885	2.2365	0.0253193	NA			ort007677	72.7776	6.30101	2.83799	2.22023
ort000746	4936.78	-5.48043	2.2063	-2.48399	0.0129918	0.074023			ort008601	35.4731	8.51102	4.01584	2.11936	0.03406	0.99619			ort005534	103.844	-5.12908	2.40037	-2.13679	0.0326151	NA			ort010096	46.5318	8.99925	4.05311	2.22033	0.0263963	NA			ort007690	410.619	3.98094	1.78136	2.23478	0.0254319	0.62362			ort003207	1032.62	-3.56127	1.60404	-2.22018
ort005049	81093.3	-5.4601	2.20112	-2.4806	0.013116	0.0741559			ort007782	52161.6	-10.4095	4.91613	-2.11742	0.0342244	0.99619			ort001214	2963.53	2.73345	1.28097	2.13388	0.0328524	0.991263			ort010159	46.5318	8.99925	4.05311	2.22033	0.0263963	NA			ort004600	213.651	-4.5354	2.03039	-2.23376	0.0254987	0.62362			ort010773	191.527	4.56818	2.0577	2.22004
ort003283	2451.32	-5.47251	2.20889	-2.47749	0.013231	0.0742351			ort001818	3977.8	2.49626	1.17979	2.11584	0.034358	0.99619			ort006276	373.609	-3.51759	1.64888	-2.13331	0.0328991	0.991263			ort011432	10736.1	-3.37171	1.52277	-2.21419	0.0268158	0.699628			ort005193	90.6346	-5.92049	2.65361	-2.23111	0.0256742	NA			ort004928	1549	-3.45472	1.55944	-2.21536
ort002824	1133.84	-5.49824	2.21931	-2.47746	0.0132322	NA			ort000715	194.543	-3.77502	1.78545	-2.11432	0.0344877	0.99619			ort002306	2028.91	11.1921	5.25031	2.13171	0.0330307	0.991263			ort008535	46.0261	8.98349	4.05909	2.21318	0.0268855	NA			ort001476	157.205	4.89987	2.19868	2.22856	0.0258435	0.629694			ort003493	332.635	-4.07323	1.83868	-2.2153
ort000601	123.153	-5.89806	2.38159	-2.47652	0.0132669	NA			ort007051	51.6098	6.59449	3.12357	2.1112	0.0347548	0.99619			ort007420	298.226	-3.69706	1.73497	-2.13092	0.0330961	0.991263			ort007320	1811.82	3.49831	1.58389	2.20868	0.0271967	0.70667			ort001509	179.342	4.70467	2.11662	2.22273	0.0262342	0.634809			ort009175	72.229	6.28996	2.84015	2.21466
ort008446	50.7291	-6.62796	2.67808	-2.4749	0.0133275	NA			ort001181	506.681	-3.01407	1.42926	-2.10884	0.0349582	0.99619			ort000183	109.629	4.93667	2.31723	2.13042	0.0331373	NA			ort005088	77.6258	-6.24288	2.83051	-2.20556	0.0274145	NA			ort007620	817.395	-3.59893	1.6193	-2.22253	0.0262478	0.634809			ort008535	42.2419	8.97694	4.05873	2.21176
ort004421	191.146	-5.72184	2.31427	-2.47242	0.0134201	NA			ort008960	65.9044	-5.50605	2.61706	-2.10391	0.0353867	0.99619			ort005419	148.902	-4.48935	2.1079	-2.12977	0.0331905	NA			ort005929	4894.58	3.37966	1.53303	2.20455	0.0274854	0.711268			ort007051	46.6143	8.95807	4.03159	2.22197	0.0262855	NA			ort009548	125.983	5.06852	2.29397	2.2095
ort007070	106.566	-5.95329	2.40875	-2.47153	0.0134535	NA			ort004353	444.782	-3.07105	1.461	-2.10201	0.0355521	0.99619			ort001856	1275.16	2.89383	1.35928	2.12894	0.0332594	0.991263			ort007620	1104.19	-3.58432	1.62727	-2.20265	0.0276193	0.711839			ort005647	119.11	-5.30219	2.38659	-2.22166	0.0263062	NA			ort001251	445.643	3.86021	1.74822	2.20808
ort002656	36907.6	-5.42442	2.19778	-2.46813	0.0135821	0.0756277			ort010969	34.5271	8.47203	4.03529	2.09948	0.0357743	0.99619			ort007483	38.6569	8.92173	4.19396	2.12728	0.0333968	NA			ort010054	952.637	-3.61634	1.64408	-2.19962	0.0278342	0.712212			ort001706	45.855	-8.98867	4.048	-2.22052	0.0263834	NA			ort004311	771.335	-3.61637	1.63822	-2.2075
ort006854	41.6972	-6.93281	2.80993	-2.46725	0.0136155	NA			ort007294	170.506	-3.87515	1.84636	-2.09881	0.0358338	0.99619			ort005305	54.0914	6.95221	3.2692	2.12658	0.0334552	NA			ort009923	347.023	4.08761	1.85861	2.19929	0.0278575	0.712212			ort009482	90.8317	5.86849	2.64534	2.21842	0.026526	NA			ort004798	403.047	3.91463	1.77385	2.20686
ort001653	89.9799	-6.03236	2.4469	-2.46531	0.0136894	NA			ort002306	1487.09	11.4573	5.46009	2.09836	0.0358731	0.99619			ort003316	1188.64	-2.90938	1.36837	-2.12617	0.0334892	0.991263			ort010464	64.2227	7.01038	3.18817	2.19887	0.0278871	NA			ort006898	89.1061	-5.89555	2.65796	-2.21807	0.0265502	NA			ort000524	341.48	-4.02594	1.82493	-2.20608
ort002057	89.9799	-6.03236	2.4469	-2.46531	0.0136894	NA			ort006485	229.401	-3.55624	1.69686	-2.09578	0.036102	0.99619			ort008107	246.82	3.84753	1.81019	2.12549	0.0335459	0.991263			ort009884	5888.67	3.34412	1.52295	2.19582	0.0281051	0.712741			ort005524	99.2773	-5.63168	2.54157	-2.21582	0.0267035	NA			ort005087	89.1418	-5.7323	2.60725	-2.1986
ort010458	3329.7	-5.4266	2.20249	-2.46384	0.0137456	0.0759627			ort004966	3160.45	2.47597	1.18166	2.09534	0.0361411	0.99619			ort001818	5931.6	2.64314	1.24382	2.12502	0.0335851	0.991263			ort001818	9442.71	3.32349	1.51356	2.19581	0.0281055	0.712741			ort002529	966.605	-3.51952	1.5892	-2.21465	0.0267838	0.638704			ort009397	119.041	-5.13604	2.34085	-2.19409
ort001102	19.2023	-9.26851	3.76566	-2.46132	0.0138427	NA			ort000762	380.073	3.1457	1.50393	2.09166	0.0364691	0.99619			ort000040	374.186	-3.49011	1.64302	-2.1242	0.0336536	0.991263			ort009042	2127.16	3.43169	1.56391	2.1943	0.028214	0.712741			ort008704	46.1236	8.9428	4.03815	2.21458	0.0267888	NA			ort010961	8486.09	3.22693	1.47371	2.18966
ort003244	19.2023	-9.26851	3.76566	-2.46132	0.0138427	NA			ort009809	32.7713	-8.55704	4.09213	-2.0911	0.0365193	0.99619			ort006098	289.666	3.69235	1.73837	2.12403	0.0336676	0.991263			ort000050	64.2686	-6.97796	3.18354	-2.19189	0.0283875	NA			ort001178	615.311	-3.693	1.66809	-2.21392	0.0268346	0.638704			ort008983	122.691	5.02917	2.29719	2.18927
ort004845	5045.01	-5.40985	2.19913	-2.46	0.0138938	0.0759886			ort010076	32.7713	-8.55704	4.09213	-2.0911	0.0365193	0.99619			ort000952	402.345	-3.43553	1.61757	-2.12388	0.0336798	0.991263			ort008352	5490.35	3.33263	1.52138	2.19054	0.0284853	0.715437			ort001856	1761.38	3.36942	1.52204	2.21376	0.0268456	0.638704			ort003831	76.2891	-6.09862	2.78777	-2.18763
ort005846	2681.81	-5.41444	2.20245	-2.45837	0.0139571	0.0759886			ort010652	353.199	-3.18448	1.52502	-2.08815	0.0367839	0.99619			ort007666	1685.9	14.3678	6.76649	2.12338	0.0337219	0.991263			ort007678	1376.65	3.49433	1.5958	2.18971	0.0285456	0.715437			ort004178	578.542	3.72179	1.68147	2.21341	0.0268693	0.638704			ort010159	40.5961	8.91961	4.08351	2.1843
ort004746	785.693	-5.44741	2.22053	-2.4532	0.014159	NA			ort010304	774.837	-2.76574	1.32595	-2.08586	0.0369916	0.99619			ort006229	61.2388	-6.71606	3.16681	-2.12077	0.0339415	NA			ort001537	316.722	4.11333	1.88031	2.18758	0.0287003	0.716495			ort005579	45.3455	-8.97255	4.05501	-2.21271	0.0269179	NA			ort009155	687.467	-3.59136	1.64457	-2.18377
ort011081	56.8067	-6.37339	2.60132	-2.45006	0.0142831	NA			ort004380	84.7662	-4.85145	2.33044	-2.08178	0.0373629	0.99619			ort003493	268.477	-3.75927	1.77369	-2.11946	0.0340516	0.996211			ort009102	44.4857	-8.90119	4.07363	-2.18507	0.0288835	NA			ort010419	161.64	4.79913	2.16993	2.21165	0.026991	0.638704			ort002367	259.797	-4.16529	1.90764	-2.18348
ort002046	2472.77	-5.38692	2.20018	-2.4484	0.0143494	0.0770869			ort009258	135.576	4.11445	1.97701	2.08115	0.0374205	0.99619			ort011644	2295.47	-10.9568	5.19782	-2.10797	0.0350339	0.999594			ort008268	181.069	-4.61887	2.11389	-2.18501	0.0288882	0.717922			ort003991	379.65	3.95964	1.79139	2.21038	0.0270789	0.638704			ort001015	995.622	-3.46188	1.58733	-2.18095
ort005326	64.3615	-6.22981	2.54598	-2.44692	0.0144082	NA			ort005085	112.502	-4.3662	2.09885	-2.08029	0.0374994	0.99619			ort005227	99.9638	4.99807	2.37473	2.10469	0.0353184	NA			ort010242	86.5344	-5.80807	2.66026	-2.18328	0.0290156	NA			ort005364	183.777	4.63018	2.09494	2.21017	0.0270936	0.638704			ort002529	842.73	-3.50947	1.60974	-2.18014
ort011124	3473.16	-5.3745	2.19702	-2.44626	0.0144345	0.0770869			ort008615	571.43	2.88373	1.38656	2.07977	0.0375465	0.99619			ort004837	139.346	4.45751	2.11914	2.10345	0.0354263	NA			ort007842	397.957	-3.94408	1.80732	-2.18228	0.0290889	0.717922			ort002460	1024.69	3.484	1.57777	2.20818	0.0272318	0.639654			ort002574	2290.94	14.7375	6.76647	2.17802
ort002147	12329.8	-5.36049	2.19223	-2.44522	0.0144764	0.0770869			ort005075	82.5755	4.9186	2.36599	2.07888	0.0376285	0.99619			ort006458	369.13	-3.43929	1.63551	-2.10289	0.0354755	0.999594			ort003740	258.155	4.25456	1.95038	2.18141	0.0291534	0.717922			ort009798	118.366	5.23722	2.37921	2.20125	0.0277184	NA			ort005090	743.983	3.54297	1.6268	2.17787
ort010099	275.74	5.93604	2.42803	2.44479	0.0144935	NA			ort001535	58.76	5.77037	2.7766	2.07821	0.0376899	0.99619			ort001120	1520.89	14.2192	6.7665	2.10142	0.0356042	0.999594			ort003120	402.911	-3.93141	1.80285	-2.18066	0.0292086	0.717922			ort000558	77.0739	6.22177	2.83089	2.19781	0.0279626	NA			ort002706	40.0475	8.89998	4.09217	2.17488
ort007860	123.322	-5.78259	2.36776	-2.44222	0.0145974	NA			ort007870	4829.51	10.156	4.89141	2.0763	0.0378664	0.99619			ort007183	844.518	-2.9667	1.41206	-2.10097	0.0356438	0.999594			ort000281	5590.32	-3.28565	1.51128	-2.17408	0.0296988	0.727164			ort010054	876.159	-3.50009	1.59399	-2.19581	0.0281059	0.657818			ort002549	96.526	-5.4258	2.49802	-2.17204
ort006687	952.574	-5.40232	2.21227	-2.44198	0.0146071	NA			ort002332	49.2449	6.52611	3.14334	2.07617	0.0378786	0.99619			ort008615	780.609	2.9933	1.42571	2.09952	0.0357714	0.999594			ort005177	592.131	-3.69343	1.70371	-2.16788	0.0301682	0.732278			ort004938	26321.2	3.13401	1.4298	2.19192	0.0283854	0.661989			ort001535	87.4039	5.55301	2.55911	2.1699
ort009884	2422.09	5.39751	2.21115	2.44104	0.014645	0.0770869			ort003107	766.265	2.74656	1.32347	2.07528	0.0379609	0.99619			ort002377	2613.91	-2.66507	1.27074	-2.09727	0.0359699	0.999594			ort009975	1702.23	-3.39044	1.56411	-2.16765	0.0301853	0.732278			ort001686	107.552	5.3652	2.44971	2.19013	0.0285145	NA			ort001071	1098.83	-3.40297	1.56891	-2.169
ort001845	2475.26	-5.36264	2.19771	-2.4401	0.0146832	0.0770869			ort004733	174.095	-3.77854	1.82145	-2.07447	0.0380361	0.99619			ort002701	89.8343	-5.24503	2.50377	-2.09485	0.0361843	NA			ort008126	159.689	4.69612	2.16734	2.16677	0.0302528	0.732278			ort005177	789.845	-3.52082	1.60778	-2.18987	0.0285338	0.662655			ort002967	56.9612	6.95406	3.21086	2.1658
ort007463	70.2391	8.01404	3.28458	2.4399	0.0146915	NA			ort010468	55.3886	-5.84676	2.82134	-2.07233	0.0382343	0.99619			ort001251	534.921	3.16284	1.51112	2.09304	0.0363459	0.999594			ort002133	176.126	-4.57729	2.11397	-2.16526	0.0303681	0.732284			ort001496	494.901	3.73167	1.70495	2.18872	0.028617	0.662655			ort009198	39.499	8.88008	4.10103	2.16533
ort004103	2347	-5.35377	2.19717	-2.43666	0.0148234	0.0772711			ort000026	1100.96	-11.1836	5.40102	-2.07065	0.0383916	0.99619			ort010501	457.016	3.2551	1.55589	2.09212	0.0364282	0.999594			ort000260	84.063	-5.76551	2.66603	-2.16258	0.0305735	NA			ort010520	64.2975	6.96799	3.18384	2.18855	0.0286297	NA			ort004380	105.277	-5.22417	2.41371	-2.16437
ort000015	55.3296	-6.33492	2.6032	-2.43351	0.0149531	NA			ort003058	33.1082	8.41148	4.06625	2.06861	0.0385827	0.99619			ort005999	345.21	3.44507	1.64884	2.08939	0.0366724	0.999594			ort001492	82.9136	5.77909	2.67405	2.16117	0.0306818	NA			ort004950	76.0925	6.20303	2.8348	2.18817	0.0286569	NA			ort006726	358.442	-3.86358	1.78555	-2.16381
ort008518	4704.73	-5.33278	2.19157	-2.43332	0.0149612	0.07744			ort010527	33.1082	8.41148	4.06625	2.06861	0.0385827	0.99619			ort006083	160.552	4.20959	2.01692	2.08714	0.0368754	NA			ort010066	684.632	3.60779	1.67078	2.15935	0.0308231	0.740451			ort009622	290.813	-4.08403	1.8687	-2.1855	0.0288526	0.66575			ort011241	1214.9	-3.36437	1.55492	-2.16369
ort002254	159.388	6.74016	2.77501	2.42887	0.0151458	NA			ort006783	57.8141	5.74652	2.78274	2.06506	0.0389174	0.99619			ort005359	88.9677	-5.23067	2.50614	-2.08714	0.0368756	NA			ort007986	103.363	-5.31727	2.46281	-2.15903	0.0308478	NA			ort001246	217.746	4.34827	1.99163	2.18327	0.0290161	0.667166			ort005844	195.088	4.35084	2.01233	2.16209
ort003400	84.0715	-5.93283	2.44699	-2.42454	0.0153277	NA			ort005042	354.31	3.12346	1.51308	2.0643	0.0389888	0.99619			ort004792	182.336	4.04733	1.94088	2.08531	0.0370413	NA			ort001606	812.307	3.54121	1.64135	2.1575	0.0309667	0.741104			ort007115	43.3075	-8.90621	4.0845	-2.18049	0.0292213	NA			ort007602	372.967	3.82336	1.76946	2.16075
ort006423	473.333	-5.39313	2.22853	-2.42004	0.0155189	NA			ort003839	213.672	3.54011	1.715	2.0642	0.0389989	0.99619			ort004186	36.349	8.83292	4.23875	2.08385	0.037174	NA			ort001596	41.9798	8.85073	4.11116	2.15285	0.0313303	NA			ort010064	1129.33	-3.37764	1.54986	-2.17932	0.0293081	0.667859			ort004686	138.87	4.73893	2.19451	2.15944
ort008466	68.962	-6.06407	2.50609	-2.41973	0.015532	NA			ort010525	1170.26	2.58118	1.25178	2.062	0.0392077	0.99619			ort001178	290.714	-3.57524	1.71675	-2.08256	0.0372913	0.999594			ort007266	42.0142	-8.81873	4.10658	-2.14746	0.0317565	NA			ort007379	121.129	-5.09866	2.33989	-2.17901	0.0293306	NA			ort003519	672.042	3.52326	1.63302	2.15751
ort000749	2391.41	-5.30319	2.19189	-2.41945	0.0155438	0.0790223			ort003427	94.1692	-4.57814	2.22283	-2.0596	0.0394366	0.99619			ort009123	170.419	-4.126	1.98554	-2.07803	0.0377069	NA			ort003290	614.961	3.61301	1.68288	2.14692	0.0317997	0.752389			ort004876	1655.06	-3.28421	1.50846	-2.1772	0.0294659	0.667859			ort004372	307.116	-3.95094	1.83129	-2.15747
ort001035	46.2978	-6.4947	2.68708	-2.41701	0.0156486	NA			ort009993	1785.62	2.48161	1.20516	2.05916	0.039479	0.99619			ort002518	432.925	3.25054	1.56454	2.07764	0.0377427	0.999594			ort001419	583.671	3.63443	1.69309	2.14663	0.0318227	0.752389			ort005892	2216.31	-3.23379	1.48564	-2.1767	0.0295029	0.667859			ort007842	1233.17	3.34141	1.54915	2.15693
ort003087	66.8541	7.94278	3.28682	2.41656	0.015668	NA			ort009008	3714.71	2.38235	1.1576	2.05801	0.0395889	0.99619			ort005107	78.4248	-5.46945	2.63578	-2.07508	0.0379794	NA			ort010167	1023.65	-3.4377	1.60216	-2.14567	0.0318996	0.752389			ort000040	374.579	-3.86584	1.77617	-2.17651	0.0295173	0.667859			ort011590	2330.3	-3.22654	1.49791	-2.15402
ort000872	432.836	5.58008	2.31144	2.41412	0.0157733	NA			ort008141	262.034	-3.33344	1.61999	-2.05769	0.03962	0.99619			ort003207	1019.24	-2.8285	1.3639	-2.07383	0.0380954	0.999594			ort003769	5969.79	3.2031	1.49292	2.14552	0.0319109	0.752389			ort007294	151.115	-4.75471	2.1851	-2.17597	0.0295576	0.667859			ort007555	616.558	3.54158	1.6458	2.15189
ort010582	1943.52	-5.29091	2.1922	-2.41352	0.0157993	0.0790223			ort004792	121.749	4.18543	2.03444	2.05729	0.0396582	0.99619			ort010525	1548.86	2.70257	1.30459	2.07158	0.0383045	0.999594			ort004066	126.629	-4.92098	2.29537	-2.14388	0.0320427	NA			ort011427	445.646	-3.74589	1.72362	-2.17327	0.0297598	0.669476			ort004395	351.151	-3.83187	1.78319	-2.14888
ort003196	667.479	-5.34026	2.21298	-2.41315	0.0158152	NA			ort007165	773.335	-2.70047	1.31291	-2.05686	0.0396999	0.99619			ort002291	56.9059	-6.60914	3.1948	-2.06872	0.0385726	NA			ort010737	260.65	4.10296	1.91834	2.13881	0.0324509	0.762298			ort005980	84.0111	-5.80913	2.67359	-2.17278	0.0297968	NA			ort002460	964.711	3.37594	1.57238	2.14702
ort011179	8354.47	-5.26869	2.18355	-2.4129	0.0158262	0.0790223			ort006449	80.2107	4.87527	2.3737	2.05387	0.0399881	0.99619			ort009044	1065.12	2.79809	1.35301	2.06805	0.0386353	0.999594			ort006630	211.681	4.27747	2.00283	2.13571	0.0327027	0.765387			ort000667	61.6307	-6.9611	3.20613	-2.17118	0.0299174	NA			ort001636	533.653	3.58635	1.67154	2.14554
ort005277	45181.1	-5.26217	2.18131	-2.41239	0.0158485	0.0790223			ort003280	225.59	-3.44941	1.68124	-2.05171	0.0401982	0.99619			ort001476	107.177	4.727	2.28705	2.06685	0.0387479	NA			ort011224	2020.59	14.4391	6.76648	2.13392	0.0328493	0.766002			ort008352	6150.5	3.12166	1.43843	2.17019	0.0299927	0.669476			ort005095	92.797	5.312	2.47866	2.1431
ort000056	2710.74	-5.27578	2.1883	-2.4109	0.0159131	0.0790223			ort002069	303.068	-3.19705	1.55956	-2.04997	0.0403678	0.99619			ort003107	584.264	3.04189	1.47277	2.06542	0.0388829	0.999594			ort003519	614.42	3.56254	1.67264	2.12989	0.033181	0.769821			ort007722	1780.32	-3.25046	1.49827	-2.16948	0.0300466	0.669476			ort003387	41.0137	-8.66673	4.04547	-2.14233
ort002565	17.7252	-9.15303	3.79784	-2.41006	0.0159498	NA			ort002401	1420.93	2.50773	1.22341	2.04979	0.0403849	0.99619			ort003519	432.061	3.2141	1.55737	2.06379	0.0390374	0.999594			ort004177	57.6475	6.85328	3.22099	2.12769	0.0333628	NA			ort006276	606.536	-3.56999	1.6465	-2.16823	0.0301416	0.669476			ort011427	472.59	-3.63923	1.69889	-2.14212
ort005385	17.7252	-9.15303	3.79784	-2.41006	0.0159498	NA			ort007214	407.755	2.9946	1.46132	2.04925	0.0404377	0.99619			ort002813	86.3679	-5.18673	2.51355	-2.06351	0.0390643	NA			ort003839	284.87	3.99555	1.87799	2.12757	0.0333727	0.769821			ort001059	1397.32	3.2924	1.51939	2.16692	0.0302408	0.669476			ort007666	1922.28	14.4844	6.76648	2.14061
ort008765	17.7252	-9.15303	3.79784	-2.41006	0.0159498	NA			ort009601	4762.26	-2.34382	1.14384	-2.04908	0.0404545	0.99619			ort001538	49.4756	6.82244	3.30733	2.06283	0.0391289	NA			ort002220	350.483	3.84945	1.80935	2.12753	0.0333758	0.769821			ort003596	296.518	4.01051	1.85119	2.16644	0.0302773	0.669476			ort009993	2279.43	3.18342	1.48985	2.13674
ort004512	170.466	-5.55334	2.30578	-2.40845	0.0160206	NA			ort004178	481.817	2.89535	1.41372	2.04803	0.0405569	0.99619			ort007677	274.954	3.54735	1.72227	2.05969	0.0394284	0.999594			ort003500	180.104	-4.40974	2.07428	-2.12592	0.0335102	0.770129			ort002591	1186.99	3.32788	1.53675	2.16553	0.0303469	0.669476			ort010096	83.5637	5.48677	2.56942	2.13542
ort010618	65.6693	7.91698	3.28771	2.40806	0.0160377	NA			ort009932	184.444	-3.63772	1.7764	-2.0478	0.0405793	0.99619			ort010148	100.397	4.80543	2.33436	2.05856	0.0395363	NA			ort000400	69.2229	-6.07528	2.8585	-2.12534	0.0335584	NA			ort002603	42.2885	-8.87185	4.09988	-2.16393	0.0304696	NA			ort005708	248.953	-4.04032	1.89409	-2.13312
ort000733	3629.89	-5.26117	2.1853	-2.40753	0.016061	0.0790223			ort002190	537.701	-2.83193	1.38427	-2.0458	0.0407765	0.99619			ort008866	167.622	4.05172	1.97078	2.05589	0.0397928	NA			ort001748	512.459	-3.62427	1.70685	-2.12337	0.0337229	0.770684			ort007800	72.3114	-6.18352	2.85797	-2.1636	0.0304949	NA			ort004837	113.914	4.91867	2.30697	2.13209
ort001457	335.701	-5.39633	2.24264	-2.40624	0.0161177	NA			ort001484	2009.11	2.43271	1.1893	2.04549	0.0408064	0.99619			ort005767	512.852	3.08216	1.50085	2.0536	0.040014	0.999594			ort000882	325.746	3.87686	1.82802	2.1208	0.0339384	0.770684			ort004928	1876.13	-3.21815	1.48949	-2.16057	0.0307285	0.67509			ort003596	208.98	4.17852	1.96114	2.13066
ort007899	5328.25	-5.25194	2.18294	-2.4059	0.0161328	0.0790223			ort001251	350.109	3.08107	1.50716	2.04429	0.0409252	0.99619			ort010242	101.387	-4.82204	2.3485	-2.05324	0.0400493	NA			ort002625	377.726	-3.77011	1.78084	-2.11704	0.0342565	0.770684			ort003333	1932.38	3.20954	1.48652	2.1591	0.0308425	0.67509			ort010984	58.8793	-6.73227	3.16539	-2.12684
ort005416	695.082	-5.30962	2.20886	-2.40378	0.0162263	NA			ort006458	330.053	-3.11967	1.52614	-2.04416	0.0409376	0.99619			ort008960	55.606	-6.57546	3.20395	-2.0523	0.0401408	NA			ort005030	345.528	-3.82589	1.8073	-2.11691	0.0342676	0.770684			ort003839	401.899	3.76634	1.74512	2.15821	0.0309115	0.67509			ort002222	37.3046	8.79761	4.13856	2.12577
ort004518	3262.49	-5.24565	2.18406	-2.40179	0.0163152	0.0790223			ort010154	565.159	-2.80032	1.37095	-2.04262	0.0410904	0.99619			ort005087	66.1488	-5.81562	2.83629	-2.05043	0.0403226	NA			ort007685	766.775	3.43854	1.62503	2.11598	0.0343465	0.770684			ort006566	477.746	3.65415	1.69563	2.15504	0.031159	0.678227			ort008384	37.3046	8.79761	4.13856	2.12577
ort009786	5490.4	-5.23684	2.18116	-2.40094	0.0163528	0.0790223			ort000034	30.657	-8.46082	4.14371	-2.04185	0.0411667	0.99619			ort003612	147.023	-4.21731	2.0591	-2.04813	0.0405473	NA			ort002307	306.894	-3.90375	1.84495	-2.11591	0.0343526	0.770684			ort010284	2797.57	3.1412	1.45931	2.15252	0.0313562	0.680253			ort005929	5058.55	3.08535	1.45145	2.1257
ort010084	64.6538	7.8945	3.28852	2.40062	0.0163672	NA			ort005231	64.4913	5.30996	2.60121	2.04134	0.0412167	0.99619			ort007226	217.104	3.73505	1.82451	2.04715	0.040643	0.999594			ort000590	2310.69	3.19925	1.51224	2.11557	0.0343817	0.770684			ort006367	2347.35	-3.15452	1.46782	-2.14913	0.0316243	0.681551			ort009130	201.941	4.19115	1.97282	2.12444
ort000090	2648.7	-5.2415	2.18478	-2.39909	0.0164357	0.0790223			ort010703	53.2744	-5.78962	2.83684	-2.04087	0.0412641	0.99619			ort004517	366.565	3.27927	1.60233	2.04656	0.040701	0.999594			ort009695	686.54	3.46961	1.64192	2.11315	0.0345882	0.771671			ort006190	1295.98	3.2628	1.5182	2.14912	0.0316248	0.681551			ort005449	728.791	3.39306	1.59955	2.12126
ort007875	52.3754	-6.25475	2.60737	-2.39887	0.0164458	NA			ort003017	854.959	-2.62598	1.28753	-2.03955	0.0413947	0.99619			ort004422	1289.27	-2.68895	1.31436	-2.04583	0.0407731	0.999594			ort003205	105.352	-5.07531	2.40315	-2.11194	0.0346919	NA			ort000095	116.544	-5.04132	2.3461	-2.14881	0.0316493	NA			ort005655	174.562	-4.33719	2.04702	-2.11879
ort007469	243910	-5.22186	2.17688	-2.39879	0.0164495	0.0790223			ort005161	80.5376	-4.775	2.34373	-2.03735	0.0416151	0.99619			ort006680	511.943	-3.06002	1.49752	-2.04339	0.041014	0.999594			ort002397	305.043	3.88987	1.84309	2.11051	0.0348142	0.771671			ort005769	155.77	4.61338	2.14896	2.1468	0.0318093	0.68244			ort007972	363.008	-3.70913	1.75382	-2.11489
ort006868	134.17	-5.60121	2.3364	-2.39737	0.0165134	NA			ort008866	138.525	3.94295	1.93642	2.0362	0.0417301	0.99619			ort006463	200.947	3.80322	1.8616	2.04298	0.0410541	0.999594			ort004686	111.697	4.96726	2.35419	2.10997	0.0348612	NA			ort006843	41.2695	-8.83666	4.11628	-2.14676	0.0318124	NA			ort010846	173.651	-4.32927	2.04715	-2.11477
ort011183	543.649	-5.30954	2.21529	-2.39677	0.0165401	NA			ort005282	2165.22	2.39604	1.17833	2.03341	0.0420106	0.99619			ort001853	376.952	3.2451	1.58964	2.04141	0.0412105	0.999594			ort005026	1802.6	14.2744	6.76648	2.10958	0.0348946	0.771671			ort009884	5606.98	3.06589	1.42867	2.14597	0.0318751	0.68244			ort005534	115.489	-4.8616	2.29936	-2.11433
ort004676	44.8207	-6.44739	2.69076	-2.39613	0.0165693	NA			ort005513	46.4071	6.43952	3.16978	2.03154	0.0422007	0.99619			ort003666	155.793	4.08555	2.00395	2.03874	0.0414756	NA			ort010422	287.582	-3.93028	1.86323	-2.10939	0.0349106	0.771671			ort003074	41.7075	8.7976	4.10292	2.14423	0.0320147	NA			ort005359	89.2347	-5.30974	2.51376	-2.11227
ort006944	37.2659	-6.76931	2.8261	-2.39528	0.0166075	NA			ort006016	84.523	4.68095	2.30563	2.03023	0.0423335	0.99619			ort009844	233.525	-3.64285	1.78838	-2.03696	0.0416543	0.999594			ort011183	463.938	-3.61983	1.71916	-2.10559	0.0352402	0.775087			ort002133	190.214	-4.36008	2.03347	-2.14416	0.0320203	0.683308			ort002993	171.685	4.31687	2.04388	2.11209
ort005984	599.825	-5.29541	2.21106	-2.39497	0.0166219	NA			ort001992	73.7218	-4.91517	2.42249	-2.02898	0.0424608	0.99619			ort009498	162.186	-4.05036	1.98851	-2.03689	0.0416613	NA			ort001541	56.36	-6.78691	3.22381	-2.10525	0.0352697	NA			ort004953	2449.93	3.12661	1.46076	2.14039	0.0323229	0.687519			ort011327	198.631	-4.1744	1.97785	-2.11058
ort009873	2200.31	-5.2317	2.18502	-2.39435	0.01665	0.079073			ort001120	1229.84	10.1826	5.01899	2.02882	0.042477	0.99619			ort005795	1456.77	-2.63549	1.29409	-2.03656	0.0416941	0.999594			ort007666	1762.65	14.2421	6.76648	2.1048	0.0353087	0.775087			ort006356	23228.9	2.99895	1.40318	2.13725	0.0325777	0.690689			ort005971	80.8207	5.43753	2.57738	2.10971
ort004021	1690.63	-5.23708	2.18778	-2.39379	0.0166753	0.079073			ort005367	110.861	-4.21196	2.07645	-2.02844	0.0425153	0.99619			ort004014	2035.93	2.56312	1.25881	2.03614	0.0417358	0.999594			ort001120	1738.37	14.2221	6.76648	2.10184	0.035567	0.778074			ort010984	58.5737	-6.8871	3.22564	-2.13511	0.0327517	NA			ort003335	429.382	-3.59032	1.70346	-2.10767
ort009991	66.0078	-5.99994	2.50759	-2.39271	0.0167245	NA			ort006036	333.388	3.07279	1.51552	2.02754	0.0426069	0.99619			ort009174	37.697	-8.47232	4.16144	-2.03591	0.0417591	NA			ort009309	177.334	4.3294	2.06219	2.09942	0.0357802	0.778197			ort004817	295.084	3.91531	1.83459	2.13416	0.0328295	0.691167			ort001214	4539.53	3.04578	1.44517	2.10755
ort010820	29.7112	-7.44736	3.11652	-2.38964	0.016865	NA			ort007052	122.75	4.07586	2.01033	2.02745	0.0426161	0.99619			ort008172	297.065	-3.41974	1.67984	-2.03575	0.041775	0.999594			ort002493	1692.01	3.19499	1.52297	2.09787	0.0359169	0.778197			ort011432	16364.1	-2.99716	1.40444	-2.13406	0.0328376	0.691167			ort003839	368.662	3.66808	1.74183	2.10588
ort003072	2223.82	-5.21269	2.183	-2.38786	0.016947	0.079572			ort002276	243.552	3.31771	1.63658	2.02722	0.04264	0.99619			ort009737	113.374	-4.55837	2.23958	-2.03537	0.0418133	NA			ort011005	377.255	-3.70853	1.76852	-2.09697	0.0359962	0.778197			ort008806	2473.93	-3.10492	1.45607	-2.13239	0.0329744	0.691167			ort000627	36.2074	8.75455	4.15898	2.10497
ort006287	2187.52	-5.20994	2.18284	-2.38677	0.016997	0.079572			ort011648	31.2163	8.32659	4.11096	2.02546	0.04282	0.99619			ort001233	590.931	-2.95489	1.45359	-2.03283	0.0420699	0.999594			ort004970	1731.35	3.18497	1.51984	2.09559	0.0361184	0.778197			ort008141	459.761	-3.60844	1.69268	-2.1318	0.0330236	0.691167			ort006302	36.2074	8.75455	4.15898	2.10497
ort009092	125.138	-5.59363	2.34404	-2.38632	0.0170181	NA			ort002496	84.0501	4.67254	2.30704	2.02534	0.0428323	0.99619			ort000092	1045.37	-2.71132	1.33621	-2.02912	0.0424461	0.999594			ort003242	38.4393	8.72361	4.16471	2.09465	0.036202	NA			ort003493	249.109	-4.04492	1.89883	-2.13022	0.0331533	0.691665			ort010399	36.2074	8.75455	4.15898	2.10497
ort009654	3288.37	-5.19294	2.17864	-2.38356	0.0171459	0.0797609			ort008892	8140.6	2.26657	1.11912	2.02531	0.0428355	0.99619			ort008277	47.1678	6.7529	3.32865	2.02872	0.0424867	NA			ort003707	38.4393	8.72361	4.16471	2.09465	0.036202	NA			ort011044	40.7262	8.76325	4.11908	2.12748	0.0333806	NA			ort004626	57.0564	-6.68647	3.17657	-2.10493
ort003356	91.7955	-5.73429	2.40641	-2.38292	0.017176	NA			ort007684	3136.08	2.33221	1.15166	2.02509	0.0428584	0.99619			ort009604	37.2637	-8.45564	4.16992	-2.02777	0.0425837	NA			ort006087	38.4393	8.72361	4.16471	2.09465	0.036202	NA			ort004380	105.354	-5.12035	2.4089	-2.1256	0.0335368	NA			ort001476	141.428	4.51555	2.146	2.10418
ort004916	969.084	-5.22598	2.1937	-2.38227	0.0172064	NA			ort007859	52.2172	-5.76017	2.84514	-2.02457	0.0429119	0.99619			ort004966	4706.29	2.4351	1.20197	2.02591	0.0427737	0.999594			ort011427	564.037	-3.49244	1.66795	-2.09385	0.0362729	0.778197			ort000610	68.7449	-6.10952	2.8747	-2.12527	0.0335642	NA			ort001320	38.7352	-8.58427	4.08216	-2.10287
ort009726	18357.1	-5.17006	2.1723	-2.37999	0.0173131	0.0798975			ort009590	1558.07	2.4314	1.20199	2.02281	0.0430923	0.99619			ort001341	1058.16	13.6959	6.76652	2.02407	0.042963	0.999594			ort002291	55.3714	-6.76115	3.22962	-2.09348	0.036306	NA			ort000013	353.7	3.75089	1.76585	2.12413	0.0336591	0.698477			ort003120	627.592	-3.3999	1.6169	-2.10273
ort006889	199.547	-5.41499	2.277	-2.37812	0.017401	NA			ort007745	872.694	10.688	5.29072	2.02014	0.043369	0.99619			ort002326	1151.26	2.65521	1.31537	2.01861	0.0435279	0.999594			ort000190	608.788	3.45389	1.65117	2.09177	0.0364587	0.778197			ort009745	2352.54	-3.08643	1.45409	-2.12258	0.0337892	0.698477			ort005365	220.876	-4.04482	1.92453	-2.10172
ort008000	1227.47	-5.20051	2.1876	-2.37727	0.0174414	NA			ort007134	131.375	3.96068	1.96069	2.02004	0.0433793	0.99619			ort004890	63.6125	5.58302	2.76604	2.01841	0.0435483	NA			ort006566	226.291	4.05382	1.94152	2.08797	0.0368007	0.778197			ort008636	4888.86	3.01553	1.42078	2.12244	0.0338007	0.698477			ort006846	799.911	-3.30469	1.57404	-2.09949
ort003241	1860.68	-5.18555	2.18163	-2.37692	0.0174579	0.0798975			ort006276	455.994	-2.85601	1.41425	-2.01944	0.043441	0.99619			ort005617	685.513	-2.84678	1.41049	-2.01828	0.0435619	0.999594			ort005415	54.8772	-6.74809	3.23259	-2.08752	0.0368415	NA			ort002099	40.2355	8.74576	4.12742	2.11894	0.0340954	NA			ort010242	113.21	-4.83186	2.30211	-2.09889
ort009400	55915.1	-5.14595	2.16925	-2.37222	0.0176815	0.0798975			ort005999	323.344	3.07233	1.52186	2.01879	0.0435086	0.99619			ort000576	70046.7	2.33716	1.15886	2.01678	0.0437186	0.999594			ort004938	22880.3	3.00769	1.4411	2.08708	0.0368806	0.778197			ort008152	40.2355	8.74576	4.12742	2.11894	0.0340954	NA			ort011589	139.782	4.49792	2.1469	2.09507
ort007390	20955.1	-5.14579	2.16972	-2.37164	0.0177091	0.0798975			ort007666	1486.73	9.87104	4.89088	2.01826	0.0435646	0.99619			ort007972	250.709	-3.51285	1.74228	-2.01624	0.0437748	0.999594			ort010419	83.9136	5.37299	2.57486	2.08671	0.0369139	NA			ort004060	119.072	-4.87444	2.30464	-2.11505	0.0344253	NA			ort007051	35.6588	8.73252	4.16959	2.09434
ort003769	2437.38	5.18992	2.18851	2.37144	0.0177188	0.0798975			ort000666	229.669	3.34217	1.65698	2.01702	0.0436931	0.99619			ort005096	649.049	2.86311	1.42022	2.01596	0.0438045	0.999594			ort003246	37.9336	8.7045	4.17311	2.08586	0.0369917	NA			ort009036	3641.81	-3.01514	1.42681	-2.1132	0.0345837	0.708056			ort002216	112.299	-4.81978	2.30324	-2.09261
ort003199	1028.89	-5.19077	2.18911	-2.37118	0.0177313	NA			ort000311	45.4611	6.40946	3.17922	2.01605	0.0437948	0.99619			ort002675	123.194	-4.34705	2.15896	-2.01349	0.0440626	NA			ort007506	283.145	-3.86297	1.85294	-2.08478	0.0370894	0.778197			ort007678	1189.82	3.18736	1.5089	2.11237	0.0346547	0.708056			ort002634	308.491	-3.74614	1.79121	-2.09141
ort006585	56.976	-6.05147	2.55277	-2.37055	0.0177617	NA			ort009044	784.515	2.60116	1.29123	2.01447	0.0439598	0.99619			ort005415	36.3971	-8.42169	4.1874	-2.0112	0.0443045	NA			ort011197	4772.72	3.04885	1.46289	2.08414	0.0371479	0.778197			ort005089	2663.83	-3.04412	1.44135	-2.11199	0.0346877	0.708056			ort002201	77.2934	-5.52238	2.64097	-2.09104
ort002137	1136.81	-5.18245	2.18678	-2.3699	0.0177927	NA			ort008984	283.476	3.15892	1.5682	2.01436	0.0439713	0.99619			ort006496	336.127	3.24533	1.6137	2.01112	0.0443132	0.999594			ort008566	1658.66	-3.15987	1.51637	-2.08384	0.0371749	0.778197			ort010773	192.703	4.24079	2.00819	2.11174	0.0347085	0.708056			ort000355	2078.66	3.07457	1.47109	2.08999
ort008223	527.739	-5.22857	2.20773	-2.3683	0.01787	NA			ort006383	30.7433	8.30457	4.12299	2.01421	0.0439875	0.99619			ort007625	593.382	-2.89333	1.43973	-2.00963	0.0444707	0.999594			ort000744	188.047	-4.21472	2.02284	-2.08357	0.0371991	0.778197			ort003155	39.2315	-8.7636	4.15128	-2.11106	0.0347673	NA			ort007063	481.267	3.47754	1.66399	2.08988
ort001434	108.551	-5.59496	2.3632	-2.36754	0.0179069	NA			ort008928	30.7433	8.30457	4.12299	2.01421	0.0439875	0.99619			ort007647	593.382	-2.89333	1.43973	-2.00963	0.0444707	0.999594			ort010284	2659.49	3.09421	1.48534	2.08317	0.0372356	0.778197			ort001102	1867.03	14.2814	6.76648	2.1106	0.0348064	0.708056			ort007468	312.686	-3.72782	1.78501	-2.08841
ort003986	393.739	5.44051	2.30072	2.36469	0.0180451	NA			ort000482	118.15	-4.07404	2.02279	-2.01407	0.0440021	0.99619			ort008141	325.223	-3.26832	1.6276	-2.00806	0.044637	0.999594			ort001239	516.494	-3.49866	1.67995	-2.0826	0.0372878	0.778197			ort000188	77.3876	-5.68845	2.69679	-2.10934	0.0349152	NA			ort008878	86.5004	-5.26369	2.52048	-2.08837
ort004259	132.862	-5.49745	2.32575	-2.36374	0.0180917	NA			ort010689	69.7496	4.99952	2.48273	2.01372	0.044039	0.99619			ort002993	150.023	4.02783	2.00693	2.00696	0.0447542	NA			ort006671	108.823	-4.89414	2.35135	-2.08142	0.0373955	NA			ort000050	86.5398	-5.42929	2.57449	-2.10888	0.0349546	NA			ort000111	50.9266	6.79112	3.25325	2.08749
ort008497	831.791	-5.17912	2.19157	-2.3632	0.0181179	NA			ort003269	239.472	-3.28872	1.63442	-2.01216	0.0442028	0.99619			ort008934	12125.8	2.34249	1.16737	2.00665	0.0447874	0.999594			ort005844	213.164	4.08482	1.96263	2.0813	0.0374063	0.778197			ort002877	815.365	3.28399	1.55884	2.10669	0.0351447	0.710798			ort007739	60.7084	6.03577	2.89414	2.08551
ort000798	787.77	-5.17929	2.19266	-2.36211	0.0181714	NA			ort004264	134.842	-3.89124	1.9346	-2.01139	0.0442839	0.99619			ort003458	1008.58	2.66513	1.32889	2.00553	0.0449068	0.999594			ort003007	317.331	-3.76454	1.81049	-2.0793	0.0375899	0.779471			ort005365	209.481	-4.13434	1.96266	-2.1065	0.0351611	0.710798			ort007320	2007	3.06531	1.47051	2.08452
ort010703	49.4212	-6.16986	2.61259	-2.36159	0.0181967	NA			ort001853	320.034	3.05571	1.5208	2.00928	0.0445074	0.99619			ort008692	1191.37	2.61428	1.30362	2.0054	0.0449201	0.999594			ort000372	205.588	4.09456	1.97398	2.07427	0.0380542	0.786536			ort003174	623.702	3.38413	1.60746	2.10527	0.0352678	0.710798			ort010703	66.2635	-5.89216	2.82833	-2.08326
ort000329	69.1313	-5.84168	2.47576	-2.35955	0.0182972	NA			ort009515	1785.56	2.3749	1.18274	2.00796	0.0446473	0.99619			ort000013	309.005	3.29355	1.64255	2.00515	0.0449474	0.999594			ort011144	53.0955	6.73354	3.24827	2.07296	0.038176	NA			ort005844	153.827	4.47406	2.12752	2.10295	0.0354705	0.712685			ort006098	430.172	3.51356	1.68715	2.08254
ort007523	8140.84	-5.10727	2.16697	-2.35687	0.0184295	0.0825958			ort008116	660.848	2.64822	1.32021	2.00591	0.0448656	0.99619			ort009155	515.548	-2.95609	1.47428	-2.0051	0.0449519	0.999594			ort003770	36.922	8.66551	4.1905	2.06789	0.03865	NA			ort007309	56.9373	6.79111	3.2301	2.10245	0.035514	NA			ort007692	573.945	3.37106	1.62067	2.08004
ort000933	81.2865	-5.71044	2.42536	-2.35448	0.0185489	NA			ort003205	137.429	-3.83719	1.91695	-2.00171	0.0453156	0.99619			ort001230	88.4245	4.81521	2.40226	2.00445	0.0450221	NA			ort005147	52.5897	6.7196	3.25157	2.06657	0.0387746	NA			ort005782	39.2541	8.71014	4.14463	2.10155	0.035593	NA			ort001341	1445	14.0727	6.7665	2.07976
ort001078	55.4989	-6.013	2.55461	-2.35379	0.0185833	NA			ort008566	1826.54	-2.35618	1.17759	-2.00084	0.0454093	0.99619			ort005345	76.0185	5.09118	2.54465	2.00074	0.0454204	NA			ort002254	522.966	3.44466	1.66702	2.06635	0.0387952	0.799257			ort010525	1800.56	3.05736	1.45935	2.09502	0.0361695	0.724499			ort000183	164.553	4.25252	2.04522	2.07925
ort009605	1346.11	-5.12874	2.17905	-2.35366	0.0185897	NA			ort005294	1129.71	-2.45694	1.22848	-1.99999	0.0455015	0.99619			ort010562	32.3102	8.66299	4.33013	2.00063	0.0454323	NA			ort001712	141.009	-4.47459	2.16565	-2.06616	0.0388131	NA			ort005122	38.2125	-8.72563	4.16966	-2.09265	0.0363804	NA			ort011003	65.8078	-5.88204	2.83043	-2.07814
ort001766	16.2481	-9.0275	3.83583	-2.35347	0.0185992	NA			ort010044	581.946	2.68685	1.34431	1.99869	0.0456418	0.99619			ort005122	35.5305	-8.38693	4.20535	-1.99435	0.046114	NA			ort002993	138.952	4.48711	2.17259	2.06533	0.0388918	NA			ort000524	267.338	-3.86458	1.84767	-2.09159	0.0364749	0.728382			ort003342	164.993	-4.2517	2.0487	-2.07532
ort004261	16.2481	-9.0275	3.83583	-2.35347	0.0185992	NA			ort006825	485.155	2.77505	1.38851	1.99859	0.0456533	0.99619			ort007717	61.3825	-5.70574	2.86248	-1.99329	0.0462301	NA			ort002574	1455.64	13.966	6.76649	2.064	0.039018	0.801254			ort007052	231.617	3.98521	1.90737	2.08938	0.0366736	0.729269			ort006143	283.47	3.75126	1.80773	2.07513
ort004487	16.2481	-9.0275	3.83583	-2.35347	0.0185992	NA			ort003467	136.689	3.82902	1.92003	1.99425	0.0461253	0.99619			ort002633	547.026	-2.88562	1.45003	-1.99004	0.0465866	0.999594			ort000170	4573.48	2.98441	1.44955	2.05885	0.0395085	0.804938			ort004353	424.643	-3.52884	1.69035	-2.08764	0.0368299	0.729269			ort003998	92.1555	5.03138	2.42596	2.07397
ort005014	87.3642	-5.66153	2.40603	-2.35306	0.0186196	NA			ort008572	975.232	2.4827	1.24595	1.99261	0.046304	0.99619			ort005754	1517	2.51599	1.2646	1.98955	0.0466405	0.999594			ort007677	1852.65	3.07339	1.49305	2.05846	0.0395456	0.804938			ort002993	186.815	4.19361	2.00904	2.08737	0.0368543	0.729269			ort004057	84.6776	-5.23216	2.52521	-2.07197
ort007996	1454.2	-5.12096	2.17737	-2.3519	0.0186776	NA			ort004910	347.549	2.95736	1.48424	1.99251	0.0463151	0.99619			ort010725	92.3196	4.6799	2.35229	1.98951	0.0466449	NA			ort008572	1033.97	3.18674	1.54836	2.05814	0.0395767	0.804938			ort002700	38.2728	8.67361	4.16232	2.08384	0.0371746	NA			ort010525	1876.28	3.03393	1.46674	2.06848
ort007288	487.181	-5.18512	2.20568	-2.3508	0.0187329	NA			ort006552	3326.79	2.26009	1.13458	1.99201	0.0463698	0.99619			ort011559	5407.66	2.34371	1.17842	1.98885	0.0467178	0.999594			ort005595	52.4057	-6.68098	3.24825	-2.05679	0.0397063	NA			ort004966	8047.05	2.89297	1.38882	2.08304	0.0372473	0.732622			ort002291	64.4406	-5.85123	2.83699	-2.06248
ort001696	1881.62	-5.10926	2.17368	-2.35051	0.0187476	0.0831037			ort007819	1254.84	2.41434	1.21204	1.99197	0.0463746	0.99619			ort003120	468.615	-2.96868	1.49271	-1.98879	0.0467244	0.999594			ort006367	1953.75	-3.0506	1.48606	-2.05281	0.0400915	0.81281			ort001251	315.843	3.71026	1.78118	2.08303	0.0372482	0.732622			ort008116	928.384	3.15991	1.53229	2.06222
ort008233	6589.78	-5.08932	2.16559	-2.35009	0.018769	0.0831037			ort011551	562.276	2.68683	1.34899	1.99174	0.0463998	0.99619			ort011582	50.8397	-6.44476	3.24088	-1.98858	0.0467473	NA			ort009577	51.9114	-6.66717	3.25155	-2.05046	0.0403194	NA			ort005090	701.661	3.26206	1.56998	2.07777	0.0377308	0.739887			ort009241	260.801	3.77339	1.83015	2.06179
ort007813	344.272	-5.22411	2.22324	-2.34977	0.0187849	NA			ort005122	28.5428	-8.35773	4.20156	-1.9892	0.0466794	0.99619			ort000736	31.7333	8.63699	4.34506	1.98777	0.0468371	NA			ort003146	245.442	3.85971	1.88296	2.04981	0.0403826	0.813853			ort000482	151.568	-4.39666	2.11746	-2.07638	0.0378586	0.74017			ort003468	34.013	8.66435	4.20301	2.06146
ort000521	1600.57	-5.10507	2.17473	-2.34745	0.0189022	0.0831924			ort000033	41.7014	-6.44564	3.24033	-1.98919	0.0466797	0.99619			ort007685	821.46	2.6924	1.35514	1.9868	0.046944	0.999594			ort007555	393.279	3.5397	1.72698	2.04965	0.0403986	0.813853			ort006416	92.3414	5.13944	2.48246	2.0703	0.038424	NA			ort001686	67.7473	5.6015	2.71736	2.06137
ort007611	67.6542	-5.80997	2.47652	-2.34602	0.0189751	NA			ort007462	52.6114	5.60781	2.81996	1.98861	0.0467439	0.99619			ort008495	150.457	3.95744	1.99192	1.98674	0.0469507	NA			ort002222	35.9104	8.62543	4.20936	2.04911	0.0404516	NA			ort008558	105.335	-4.89076	2.36422	-2.06865	0.0385785	NA			ort005122	36.4567	-8.4968	4.12261	-2.06103
ort011520	57.7145	7.7307	3.29557	2.34579	0.018987	NA			ort002485	2112.52	2.29638	1.15828	1.98258	0.0474149	0.99619			ort000988	3047.62	2.3883	1.20328	1.98482	0.047164	0.999594			ort004014	1988.75	3.03317	1.48158	2.04726	0.0406328	0.81599			ort007206	159.262	4.31025	2.08444	2.06782	0.038657	0.753523			ort004505	514.913	-3.36573	1.63374	-2.06014
ort010674	812.927	-5.12279	2.18616	-2.34328	0.0191149	NA			ort005419	113.921	-4.01828	2.02818	-1.98122	0.0475664	0.99619			ort001702	871.223	13.4155	6.76654	1.98262	0.0474099	0.999594			ort001183	36.0828	-8.59916	4.20195	-2.04647	0.0407102	NA			ort011098	752.256	-3.20485	1.55118	-2.06607	0.0388222	0.754491			ort006128	1036.51	3.12434	1.51702	2.05953
ort010348	1760.75	-5.08858	2.17212	-2.34268	0.0191459	0.0833843			ort001419	470.91	2.73991	1.3861	1.97671	0.0480744	0.99619			ort008352	3154.67	2.37309	1.1986	1.97988	0.0477167	0.999594			ort009635	147.527	4.34474	2.12328	2.04625	0.0407322	NA			ort005901	37.2914	8.63614	4.18119	2.06547	0.0388783	NA			ort008352	4824.75	2.9195	1.41824	2.05855
ort003427	91.9647	-5.59678	2.38931	-2.34243	0.0191587	NA			ort001341	1030.14	13.3705	6.76651	1.97598	0.0481571	0.99619			ort009978	92.2881	-4.68134	2.36847	-1.97653	0.0480951	NA			ort004057	80.1202	-5.27055	2.57862	-2.04394	0.0409594	NA			ort003077	113.988	4.75303	2.3027	2.06411	0.0390076	NA			ort002922	58.5141	5.98183	2.90673	2.05792
ort008812	6130.25	-5.06724	2.16349	-2.34216	0.0191727	0.0833843			ort001490	120.441	3.93317	1.99133	1.97515	0.0482512	0.99619			ort005177	676.986	-2.74832	1.39068	-1.97624	0.0481278	0.999594			ort005294	860.505	-3.19012	1.5628	-2.04129	0.0412224	0.822721			ort002493	1699.87	2.98564	1.44765	2.0624	0.0391698	0.755104			ort003472	48.7322	6.72699	3.271	2.05655
ort011412	530.063	-5.1463	2.19898	-2.34031	0.0192678	NA			ort006129	51.6654	5.5811	2.82749	1.97387	0.0483964	0.99619			ort007694	319.538	3.1862	1.6127	1.97569	0.0481898	0.999594			ort011480	360.978	3.56222	1.74562	2.04066	0.0412846	0.822721			ort001478	3102.08	-2.90417	1.40843	-2.06199	0.0392091	0.755104			ort006087	48.7322	6.72699	3.271	2.05655
ort009013	425.004	5.32566	2.27714	2.33875	0.0193485	NA			ort011135	68.9647	-4.81563	2.4427	-1.97144	0.0486735	0.99619			ort003707	31.1563	8.61052	4.36045	1.97469	0.0483038	NA			ort001341	1300.36	13.8033	6.7665	2.03995	0.0413558	0.822721			ort007972	331.234	-3.61308	1.75247	-2.06171	0.0392357	0.755104			ort007455	48.7322	6.72699	3.271	2.05655
ort011437	57632.5	-5.04332	2.15872	-2.33626	0.0194779	0.0842132			ort008172	307.798	-2.98451	1.51458	-1.97053	0.0487781	0.99619			ort006449	31.1563	8.61052	4.36045	1.97469	0.0483038	NA			ort010957	50.9229	-6.63916	3.25831	-2.03761	0.0415894	NA			ort002625	383.996	-3.51372	1.70498	-2.06086	0.0393163	0.755104			ort004976	121.315	4.53611	2.20795	2.05444
ort001760	184.776	-5.30133	2.27067	-2.33469	0.0195594	NA			ort001815	5568.15	2.17393	1.10469	1.96791	0.0490778	0.99619			ort003494	60.1507	5.50056	2.78626	1.97417	0.0483622	NA			ort005433	102.398	-4.80329	2.35871	-2.03641	0.0417096	NA			ort006316	306.872	-3.65484	1.7765	-2.05733	0.0396542	0.75638			ort001264	135	-4.41755	2.15042	-2.05428
ort001597	56.1913	7.69211	3.29776	2.33253	0.019673	NA			ort001065	1477.04	-2.32684	1.18299	-1.96692	0.0491919	0.99619			ort004264	84.7784	-4.82714	2.44615	-1.97336	0.0484546	NA			ort000225	17982.8	2.87101	1.41199	2.03331	0.0420209	0.83335			ort002190	575.212	-3.2861	1.59835	-2.05594	0.0397884	0.75638			ort010167	1445.64	-3.03804	1.47971	-2.05314
ort008960	125.476	-5.41306	2.32289	-2.33031	0.0197895	NA			ort005368	636.782	2.57622	1.31	1.96658	0.0492318	0.99619			ort005364	95.6377	4.55607	2.30944	1.9728	0.0485181	NA			ort006891	168.758	-4.13226	2.03792	-2.02769	0.0425919	0.839814			ort008657	141.906	-4.40911	2.14463	-2.05589	0.0397933	0.75638			ort009604	36.001	-8.47866	4.13124	-2.05233
ort008873	2019.35	-5.04822	2.16679	-2.32981	0.019816	0.0846572			ort004457	662.35	2.55708	1.30122	1.96514	0.0493985	0.99619			ort003168	117.128	-4.27053	2.16618	-1.97146	0.0486718	NA			ort000734	208.083	3.92518	1.93657	2.02687	0.042676	0.839814			ort009241	179.455	4.13238	2.01056	2.05534	0.039846	0.75638			ort007670	2213.97	2.96667	1.4468	2.05051
ort008879	3562.02	-5.03237	2.16176	-2.32791	0.0199171	0.0846572			ort003057	562.099	-2.61266	1.3336	-1.95911	0.0500999	0.99619			ort002471	617.059	-2.779	1.40963	-1.97144	0.048674	0.999594			ort002535	410.901	3.44304	1.69992	2.02541	0.042825	0.839814			ort000087	358.615	-3.53615	1.72204	-2.05347	0.0400268	0.757608			ort007216	33.4644	8.64089	4.2148	2.05013
ort005035	4431.85	-5.02545	2.16017	-2.32641	0.0199966	0.0846572			ort001538	50.7195	5.55387	2.83526	1.95886	0.0501295	0.99619			ort008337	996.902	2.57819	1.31072	1.96701	0.0491823	0.999594			ort008486	423.511	3.42454	1.6915	2.02456	0.0429128	0.839814			ort001341	1394.5	13.8604	6.76649	2.04839	0.0405223	0.763638			ort003001	242.976	3.7877	1.84928	2.04821
ort005024	1186.83	-5.05333	2.17281	-2.32572	0.0200337	NA			ort004714	78.8963	-4.51281	2.30407	-1.95862	0.0501573	0.99619			ort000882	411.584	2.97773	1.51672	1.96326	0.0496159	0.999594			ort011032	93.4889	-4.89752	2.42002	-2.02375	0.0429961	NA			ort001181	419.983	-3.42288	1.67176	-2.04747	0.0406117	0.763638			ort000832	119.669	4.51555	2.20953	2.04367
ort001088	5547.1	-5.01828	2.15871	-2.32466	0.02009	0.0846572			ort010733	108.978	4.01625	2.05103	1.95816	0.0502109	0.99619			ort007268	2869.89	2.347	1.19589	1.96255	0.049699	0.999594			ort003211	664.619	3.22391	1.59345	2.02323	0.0430496	0.839814			ort003427	109.392	-4.74775	2.31886	-2.04745	0.0406142	NA			ort001764	35.5452	-8.46028	4.14007	-2.04351
ort009215	26043.4	-5.00789	2.1554	-2.32342	0.0201565	0.0846572			ort004014	1425.08	2.31558	1.18288	1.95758	0.0502797	0.99619			ort003086	1109.44	2.52949	1.29053	1.96004	0.049991	0.999594			ort000524	240.096	-3.79017	1.87413	-2.02237	0.0431384	0.839814			ort000736	36.3101	8.59766	4.20093	2.04661	0.0406963	NA			ort005615	1407.45	-3.01749	1.4769	-2.04312
ort001483	26.757	-7.29536	3.14007	-2.32331	0.0201624	NA			ort010065	496.645	2.66463	1.36251	1.95568	0.0505028	0.99619			ort001015	694.744	-2.69577	1.37595	-1.95921	0.0500885	0.999594			ort007483	34.3931	8.56315	4.23824	2.02045	0.0433371	NA			ort005708	199.272	-3.99288	1.95098	-2.04661	0.0406968	0.763638			ort003189	163.718	-4.14172	2.03006	-2.04019
ort009958	26.757	-7.29536	3.14007	-2.32331	0.0201624	NA			ort005942	15780.9	2.11199	1.08011	1.95534	0.0505429	0.99619			ort010820	33.7973	-8.31478	4.24444	-1.95898	0.0501148	NA			ort007295	401.141	-3.43794	1.70267	-2.01914	0.0434727	0.843741			ort010652	514.317	-3.3101	1.6183	-2.04542	0.0408131	0.763638			ort004060	145.211	-4.27506	2.09638	-2.03926
ort011598	26.757	-7.29536	3.14007	-2.32331	0.0201624	NA			ort000092	667.12	-2.53134	1.29482	-1.95497	0.0505862	0.99619			ort008812	3252.78	-2.3249	1.1868	-1.95896	0.0501176	0.999594			ort011524	34.6	-8.53861	4.2299	-2.01863	0.0435255	NA			ort003769	5773.84	2.81499	1.37713	2.0441	0.0409435	0.763889			ort000040	331.657	-3.5354	1.73638	-2.03607
ort002686	209.256	-5.23401	2.25348	-2.32264	0.0201987	NA			ort011508	77.4284	4.54931	2.32846	1.95379	0.0507265	0.99619			ort006351	929.24	2.58149	1.3181	1.95849	0.0501722	0.999594			ort007859	68.7401	-5.46927	2.71151	-2.01706	0.0436895	NA			ort006610	51.4407	-6.69807	3.27915	-2.04262	0.04109	NA			ort010513	65.5529	5.553	2.72736	2.03603
ort005176	89.0105	-5.54869	2.38909	-2.32251	0.0202054	NA			ort005769	126.228	3.79966	1.94644	1.95211	0.0509253	0.99619			ort011328	48.6732	-6.38119	3.25984	-1.95751	0.050287	NA			ort003017	952.787	-3.08984	1.53339	-2.01503	0.0439015	0.849353			ort004774	101.768	-4.83936	2.37105	-2.04102	0.0412485	NA			ort007931	1078.99	3.05054	1.49916	2.03483
ort011289	242.767	-5.19948	2.23947	-2.32175	0.0202463	NA			ort007455	41.6774	6.28255	3.22055	1.95077	0.0510848	0.99619			ort005780	42.552	6.60288	3.37764	1.95488	0.050597	NA			ort005090	488.561	3.31939	1.64933	2.01257	0.0441601	0.849353			ort001957	259.658	-3.73357	1.82997	-2.04024	0.0413266	0.765182			ort005085	88.8718	-4.97263	2.4452	-2.03363
ort003939	3269.49	-5.01368	2.16022	-2.32091	0.0202917	0.0847408			ort005273	406.113	2.75721	1.41461	1.9491	0.0512838	0.99619			ort006367	1506.27	-2.43259	1.24664	-1.95132	0.0510193	0.999594			ort006742	1143.57	13.6179	6.76651	2.01255	0.0441621	0.849353			ort003017	1041.66	-3.03385	1.48787	-2.03905	0.0414451	0.765182			ort011013	8414.54	2.83332	1.39339	2.0334
ort004090	4228.21	-5.00394	2.15812	-2.31866	0.0204135	0.0847678			ort007815	101.347	-4.07518	2.09194	-1.94804	0.0514099	0.99619			ort001075	1241.3	-2.47486	1.26968	-1.9492	0.0512718	0.999594			ort004060	76.6602	-5.20518	2.58791	-2.01134	0.0442891	NA			ort009485	232.164	3.8267	1.87685	2.0389	0.0414605	0.765182			ort001500	73.1404	5.28997	2.60308	2.03219
ort008737	52.5447	-5.93283	2.5588	-2.3186	0.020417	NA			ort008884	2284.12	2.21	1.13663	1.94435	0.0518538	0.99619			ort000088	597.85	-2.73886	1.40531	-1.94893	0.0513035	0.999594			ort002692	156.597	4.14045	2.06224	2.00774	0.0446707	0.855743			ort008925	657.954	3.1841	1.56184	2.03868	0.0414816	0.765182			ort008107	242.334	3.74117	1.84099	2.03215
ort000325	224.534	-5.20565	2.24535	-2.31842	0.0204265	NA			ort008126	111.872	3.93364	2.02338	1.9441	0.051884	0.99619			ort002329	5857.44	-2.25146	1.15584	-1.9479	0.0514272	0.999594			ort007815	98.4432	-4.74439	2.36398	-2.00695	0.0447545	NA			ort004499	80.5463	5.26759	2.58557	2.0373	0.0416198	NA			ort011462	250.926	3.71355	1.8275	2.03204
ort010057	11969.3	-4.98957	2.15421	-2.31619	0.0205477	0.084846			ort004890	57.3967	5.13732	2.64307	1.9437	0.0519321	0.99619			ort008562	1966.01	2.36638	1.21632	1.94552	0.0517121	0.999594			ort007319	1152.26	3.01901	1.50507	2.00589	0.0448679	0.855743			ort001981	231.673	3.82343	1.8768	2.03721	0.0416294	0.765747			ort005364	192.885	3.93351	1.93696	2.03077
ort006355	3257.72	-4.9854	2.1573	-2.31094	0.0208361	0.0855561			ort005522	310.797	2.91105	1.49854	1.9426	0.0520648	0.99619			ort007224	2153.43	2.34358	1.20676	1.94204	0.0521326	0.999594			ort002769	1713.55	2.94271	1.46779	2.00486	0.0449782	0.855743			ort009165	86.5209	-5.09865	2.50685	-2.03389	0.0419628	NA			ort010501	650.156	3.18878	1.57034	2.03063
ort000093	1092.08	-5.00398	2.16864	-2.30743	0.0210307	NA			ort000357	754.864	-2.45621	1.26517	-1.94141	0.0522085	0.99619			ort009479	118.571	-4.14421	2.13506	-1.94102	0.0522553	NA			ort001856	1464.93	2.96728	1.48042	2.00435	0.0450321	0.855743			ort010167	1491.83	-2.9377	1.44473	-2.03339	0.0420136	0.769984			ort007379	124.426	-4.4383	2.18598	-2.03035
ort009062	1537.27	-4.99045	2.16323	-2.30694	0.0210582	NA			ort007647	554.115	-2.57857	1.32859	-1.94083	0.0522791	0.99619			ort001731	711.402	13.1231	6.76656	1.93941	0.0524519	0.999594			ort002866	150.033	4.16759	2.08167	2.00204	0.0452805	NA			ort000183	152.392	4.24336	2.08768	2.03257	0.0420956	0.769984			ort007052	278.803	3.62059	1.78613	2.02706
ort008756	5103.4	-4.96728	2.15367	-2.30642	0.021087	0.0861053			ort004834	128.443	-3.73255	1.9241	-1.9399	0.0523918	0.99619			ort007689	482.713	2.82228	1.45534	1.93926	0.0524698	0.999594			ort000715	117.261	-4.47141	2.23352	-2.00196	0.0452891	NA			ort001015	1029.94	-3.01552	1.48506	-2.03057	0.0422983	0.771531			ort003707	32.3672	8.59279	4.23943	2.02687
ort008114	144344	-4.94707	2.14858	-2.30248	0.0213079	0.0865264			ort005572	193.458	-3.28742	1.69483	-1.93968	0.0524189	0.99619			ort011468	2569.96	2.31062	1.19173	1.93887	0.0525169	0.999594			ort011536	82.3848	5.015	2.50587	2.0013	0.0453605	NA			ort006131	288.837	3.60689	1.78102	2.02518	0.0428489	0.777474			ort003710	478.178	-3.30675	1.632	-2.02619
ort000667	44.9899	-6.03236	2.62227	-2.30043	0.0214238	NA			ort004935	790.051	2.43696	1.25651	1.93948	0.0524435	0.99619			ort001686	64.0458	5.16799	2.66914	1.9362	0.0528431	NA			ort007285	7492.14	2.81057	1.40464	2.00092	0.0454013	0.856029			ort004014	2388.11	2.844	1.40441	2.02505	0.0428623	0.777474			ort007800	61.2507	-5.77669	2.85333	-2.02454
ort002315	44.9899	-6.03236	2.62227	-2.30043	0.0214238	NA			ort007685	716.24	2.47149	1.27436	1.9394	0.0524528	0.99619			ort004953	1301.04	2.42992	1.2558	1.93496	0.0529957	0.999594			ort009178	1102.75	-13.5322	6.76653	-1.99986	0.0455149	0.856029			ort004851	1237	13.6875	6.7665	2.02283	0.0430906	0.779451			ort002633	548.932	-3.23617	1.59986	-2.02278
ort002460	301.036	5.31324	2.31153	2.29858	0.0215288	NA			ort007261	166.946	-3.42834	1.76935	-1.93763	0.0526687	0.99619			ort003879	775.315	-2.59345	1.34033	-1.93493	0.0529989	0.999594			ort000662	33.6114	-8.49679	4.24975	-1.99936	0.0455691	NA			ort003181	231.692	3.77285	1.86721	2.02058	0.0433236	0.780447			ort004600	116.586	-4.49904	2.22432	-2.02265
ort008863	1559.48	-4.9642	2.16019	-2.29804	0.0215595	0.0867868			ort011083	673.073	-2.49028	1.28526	-1.93756	0.0526769	0.99619			ort000634	117.705	-4.13303	2.13611	-1.93484	0.0530097	NA			ort005122	33.6114	-8.49679	4.24975	-1.99936	0.0455691	NA			ort007018	132.709	4.37194	2.16517	2.01921	0.043465	0.780447			ort009601	7362.8	-2.80797	1.38947	-2.02089
ort009880	458.147	-5.03717	2.19198	-2.29801	0.0215614	NA			ort006752	1328.2	2.28831	1.18163	1.93658	0.0527969	0.99619			ort009669	153.374	-3.78324	1.95571	-1.93445	0.0530574	NA			ort003472	47.5319	6.57226	3.28784	1.99896	0.0456126	NA			ort007917	155.355	4.1745	2.06778	2.01884	0.0435042	0.780447			ort000817	86.1209	4.93058	2.44001	2.02072
ort007468	296.497	-5.08896	2.21601	-2.29645	0.0216499	NA			ort007280	8196.03	2.09504	1.08214	1.93601	0.0528659	0.99619			ort010961	4986.31	2.23259	1.15456	1.93371	0.0531494	0.999594			ort007420	222.773	-3.77416	1.88877	-1.99821	0.0456936	0.856029			ort005301	162.192	-4.11797	2.041	-2.01762	0.0436308	0.780573			ort002518	547.696	3.22664	1.59751	2.01979
ort000079	1825.12	-4.95408	2.15767	-2.29603	0.021674	0.0867868			ort006013	931.996	2.37485	1.22744	1.9348	0.0530151	0.99619			ort007938	1385.26	-2.41093	1.24734	-1.93286	0.0532539	0.999594			ort001268	1263.16	2.97699	1.4904	1.99744	0.045777	0.856029			ort005359	68.7261	-5.51368	2.73409	-2.01664	0.0437334	NA			ort004715	34.1781	-8.40369	4.16778	-2.01635
ort001874	40427	-4.92671	2.1466	-2.29512	0.0217262	0.0867868			ort007739	69.8052	4.66747	2.41366	1.93377	0.0531412	0.99619			ort003155	32.4974	-8.25819	4.27509	-1.9317	0.0533968	NA			ort008589	1208.64	-2.98487	1.49472	-1.99694	0.045832	0.856029			ort001692	191.63	-3.93284	1.95164	-2.01515	0.0438888	0.781553			ort005654	264.465	-3.63119	1.80144	-2.01572
ort000299	14.771	-8.88999	3.88164	-2.29027	0.0220057	NA			ort003472	40.7314	6.24899	3.23176	1.93362	0.0531602	0.99619			ort001692	282.185	-3.1669	1.64011	-1.93091	0.0534945	0.999594			ort006316	301.066	-3.54407	1.77493	-1.99674	0.0458539	0.856029			ort003407	2458.3	2.81589	1.3976	2.01481	0.043925	0.781553			ort004978	834.411	-3.06845	1.52274	-2.01508
ort005415	14.771	-8.88999	3.88164	-2.29027	0.0220057	NA			ort000981	209.804	3.19812	1.65454	1.93294	0.0532435	0.99619			ort001065	1653.84	-2.36118	1.22476	-1.92788	0.0538704	0.999594			ort011248	109.835	-4.53157	2.27241	-1.99417	0.0461332	NA			ort005095	93.3415	4.88427	2.4258	2.01347	0.0440656	NA			ort001731	1066.47	13.6345	6.76652	2.01499
ort006713	14.771	-8.88999	3.88164	-2.29027	0.0220057	NA			ort008236	5204.05	8.67664	4.48914	1.93281	0.05326	0.99619			ort011551	676.187	2.63029	1.36438	1.92784	0.0538756	0.999594			ort006783	65.717	5.43686	2.72846	1.99264	0.0463005	NA			ort000317	34.1365	-8.5629	4.2542	-2.01281	0.0441344	NA			ort000736	31.8186	8.56813	4.25229	2.01494
ort002640	186.761	-5.16111	2.25445	-2.2893	0.0220622	NA			ort004149	903.645	-2.37936	1.23107	-1.93276	0.0532655	0.99619			ort007319	1185.48	2.43493	1.26398	1.92639	0.0540553	0.999594			ort003086	1421.47	2.93774	1.47539	1.99116	0.0464635	0.862701			ort004715	34.1365	-8.5629	4.2542	-2.01281	0.0441344	NA			ort010527	31.8186	8.56813	4.25229	2.01494
ort005844	119.445	6.31944	2.76268	2.28744	0.0221704	NA			ort004422	1052.01	-2.33459	1.20844	-1.93191	0.0533707	0.99619			ort011197	2805.42	2.27134	1.17946	1.92574	0.0541364	0.999594			ort011590	2272.02	-2.86854	1.44076	-1.99099	0.0464823	0.862701			ort008215	34.1365	-8.5629	4.2542	-2.01281	0.0441344	NA			ort000013	249.187	3.66338	1.81931	2.01361
ort011457	25.2799	-7.2129	3.15418	-2.28677	0.022209	NA			ort000382	237.553	-3.08344	1.59664	-1.93121	0.0534576	0.99619			ort002401	1403.63	2.39002	1.24146	1.92517	0.0542082	0.999594			ort005207	47.4629	-6.53659	3.28382	-1.99054	0.046531	NA			ort002401	1742.35	2.85606	1.42004	2.01126	0.0442985	0.784751			ort005754	1643.35	2.91559	1.448	2.01353
ort004503	264.631	-5.07657	2.22098	-2.28574	0.0222695	NA			ort006028	119.078	3.80929	1.97255	1.93115	0.0534649	0.99619			ort000975	40.8211	6.54234	3.39844	1.9251	0.0542171	NA			ort007587	33.1171	-8.47542	4.26006	-1.9895	0.0466455	NA			ort000111	50.0679	6.60383	3.28411	2.01085	0.0443417	NA			ort004851	1052.76	13.6158	6.76652	2.01223
ort000998	327.223	-5.04079	2.20595	-2.28509	0.0223078	NA			ort009033	27.4325	8.14017	4.2167	1.93046	0.0535495	0.99619			ort007931	1335.53	2.39985	1.24714	1.92428	0.0543191	0.999594			ort008178	33.1171	-8.47542	4.26006	-1.9895	0.0466455	NA			ort002465	457.42	3.27618	1.62928	2.01081	0.0443451	0.784751			ort001129	86.1376	-4.92609	2.45168	-2.00927
ort002533	415.772	-5.00879	2.19244	-2.28457	0.0223382	NA			ort003330	40.2584	6.23192	3.23767	1.92481	0.0542526	0.99619			ort008774	642.716	2.64054	1.37321	1.92289	0.0544934	0.999594			ort005419	127.169	-4.31847	2.17106	-1.98911	0.0466892	NA			ort008681	91.0876	-4.90393	2.44017	-2.00966	0.0444668	NA			ort005306	329.564	-3.46135	1.72305	-2.00885
ort009223	1733.33	-4.92208	2.1548	-2.28424	0.0223576	0.088826			ort010557	1257.09	2.27604	1.18276	1.92434	0.0543115	0.99619			ort003257	2088.61	-2.30286	1.19909	-1.92051	0.0547932	0.999594			ort009244	718.99	3.09926	1.55881	1.98823	0.0467867	0.863954			ort008928	34.3474	8.51749	4.24312	2.00737	0.0447106	NA			ort003333	1810.32	2.88726	1.43792	2.00794
ort005189	582.192	-4.97499	2.17817	-2.28402	0.0223703	NA			ort005781	114.867	-3.82564	1.98828	-1.9241	0.0543422	0.99619			ort004175	337.779	-3.0012	1.56314	-1.91998	0.054861	0.999594			ort007635	197.461	3.84448	1.93393	1.98791	0.0468213	0.863954			ort007420	350.407	-3.42047	1.70408	-2.00722	0.0447263	0.78725			ort007299	407.703	-3.33514	1.6613	-2.00755
ort007987	31.3576	-6.51777	2.85685	-2.28145	0.0225218	NA			ort001509	62.655	4.83964	2.51817	1.92189	0.0546197	0.99619			ort009178	864.432	-12.9909	6.76654	-1.91988	0.0548736	0.999594			ort008681	56.8658	-5.78694	2.91454	-1.98554	0.0470848	NA			ort004909	4963.57	2.73658	1.36337	2.00721	0.0447274	0.78725			ort007001	45.4406	6.62511	3.3002	2.00749
ort003027	49.5905	-5.84794	2.56372	-2.28103	0.0225466	NA			ort008107	233.425	3.06971	1.59958	1.91907	0.0549753	0.99619			ort009601	7230.03	-2.17796	1.13549	-1.91807	0.0551021	0.999594			ort006548	707.035	-3.08907	1.55825	-1.9824	0.0474349	0.872746			ort007739	59.9002	5.85254	2.91651	2.00669	0.0447826	NA			ort000649	54.6739	5.8823	2.93076	2.00709
ort005419	115.137	-5.28595	2.31935	-2.27906	0.0226633	NA			ort000040	285.709	-2.90841	1.51627	-1.91814	0.055093	0.99619			ort011595	214.658	3.35884	1.7521	1.91703	0.055234	0.999594			ort005606	106.616	4.52144	2.28178	1.98154	0.0475304	NA			ort011590	2825.12	-2.77485	1.38457	-2.00413	0.0450559	0.788509			ort005458	33.7224	-8.38433	4.17745	-2.00704
ort002954	2139.15	-4.89122	2.14988	-2.27512	0.0228988	0.0896929			ort003458	563.11	2.52173	1.31493	1.91777	0.0551406	0.99619			ort001250	486.079	-2.76566	1.44293	-1.9167	0.0552765	0.999594			ort005085	81.1203	-4.95773	2.50312	-1.98062	0.0476339	NA			ort000715	184.006	-3.93586	1.96477	-2.00321	0.0451544	0.788509			ort001586	388.647	-3.35683	1.67333	-2.00608
ort005205	1437.97	-4.90178	2.15454	-2.27509	0.0229005	NA			ort010531	26.9595	8.11508	4.23176	1.91766	0.0551538	0.99619			ort005572	159.294	-3.67854	1.92032	-1.91559	0.055417	NA			ort000756	333.298	-3.42858	1.73166	-1.97994	0.0477108	0.874723			ort008990	1102.37	2.9298	1.4626	2.00315	0.0451612	0.788509			ort008615	994.526	2.99657	1.49385	2.00593
ort000888	1894.9	4.92072	2.16303	2.27492	0.0229108	0.0896929			ort007112	326.103	-2.81087	1.46751	-1.9154	0.0554411	0.99619			ort001544	218.935	-3.34487	1.74634	-1.91536	0.0554467	0.999594			ort002108	88.0517	-4.80808	2.42972	-1.97887	0.0478311	NA			ort002201	58.5549	-5.87441	2.93278	-2.00302	0.0451752	NA			ort004245	369.194	3.37998	1.68539	2.00546
ort007386	49.929	7.52165	3.30778	2.27393	0.0229703	NA			ort000649	62.182	4.82833	2.52098	1.91526	0.0554597	0.99619			ort003280	189.764	-3.48301	1.81947	-1.9143	0.0555824	NA			ort006081	770.004	-3.05013	1.5419	-1.97817	0.0479099	0.874723			ort001990	280.907	-3.55112	1.77639	-1.99907	0.0456009	0.794063			ort006675	340.768	3.41738	1.70687	2.00213
ort006294	60.2687	-5.64005	2.48167	-2.27269	0.0230451	NA			ort004976	125.337	3.69471	1.9293	1.91505	0.0554857	0.99619			ort000667	45.6401	-6.28721	3.28902	-1.91158	0.0559302	NA			ort010644	106.111	4.51428	2.28231	1.97795	0.0479349	NA			ort007938	2654.17	-2.7643	1.38434	-1.99683	0.0458432	0.794455			ort000268	59.4279	-5.73229	2.86314	-2.0021
ort011340	54640.7	-4.86296	2.1399	-2.27252	0.0230553	0.0896929			ort002738	507.189	2.56151	1.33821	1.91412	0.0556045	0.99619			ort008737	63.6927	-5.16172	2.70115	-1.91094	0.0560129	NA			ort007722	1635.59	-2.87891	1.45563	-1.97777	0.0479545	0.874723			ort004731	1465.37	2.85148	1.42816	1.99662	0.0458667	0.794455			ort005849	1133.85	-2.95561	1.47677	-2.0014
ort008606	1950.06	-4.8856	2.15	-2.27237	0.0230639	0.0896929			ort007789	79.3759	4.35423	2.27597	1.91313	0.0557314	0.99619			ort009175	48.178	5.77063	3.02154	1.90983	0.0561549	NA			ort000205	107.363	-4.4973	2.27483	-1.97698	0.0480436	NA			ort000248	593.543	3.10898	1.55927	1.99387	0.0461668	0.797537			ort011436	113.396	-4.45722	2.22797	-2.00058
ort008339	272.525	-5.02434	2.21367	-2.26968	0.0232268	NA			ort007299	155.957	-3.42977	1.79325	-1.9126	0.0557999	0.99619			ort005565	1780.17	-2.30258	1.20722	-1.90734	0.0564764	0.999594			ort001181	340.241	-3.40574	1.72317	-1.97644	0.0481047	0.874955			ort006903	335.669	-3.40526	1.70966	-1.99178	0.0463957	0.799378			ort009798	171.769	3.94374	1.97322	1.99863
ort003719	764.567	-4.91424	2.1654	-2.26943	0.0232419	NA			ort001210	3312.63	-2.10631	1.10169	-1.9119	0.055889	0.99619			ort000579	251.858	-3.19401	1.67526	-1.90658	0.0565755	0.999594			ort000933	46.4743	-6.50589	3.29182	-1.97638	0.0481118	NA			ort004504	57.5359	-5.84865	2.93964	-1.98958	0.0466371	NA			ort000299	33.2667	-8.3647	4.18736	-1.99761
ort001941	81.625	-5.42094	2.38902	-2.2691	0.0232621	NA			ort001233	707.32	-2.41595	1.26402	-1.91133	0.0559628	0.99619			ort010011	28.2715	8.47034	4.44394	1.90604	0.0566449	NA			ort003333	1668.93	2.85905	1.45029	1.97136	0.0486827	0.876356			ort008116	1098.54	2.89187	1.45501	1.98753	0.0468638	0.804258			ort002471	665.282	-3.0957	1.54971	-1.9976
ort005855	2045.37	-4.87218	2.14822	-2.268	0.0233291	0.0902469			ort010003	823.381	2.35977	1.23612	1.90902	0.0562599	0.99619			ort004667	425.718	-2.81148	1.47598	-1.90483	0.0568026	0.999594			ort005654	341.735	-3.38566	1.71815	-1.97053	0.0487778	0.876356			ort009548	169.66	3.96805	1.99819	1.98582	0.0470531	0.804258			ort004909	4805.48	2.76913	1.38686	1.99669
ort006956	1023	-4.89145	2.15786	-2.2668	0.0234024	NA			ort011436	116.24	3.77198	1.9759	1.909	0.0562627	0.99619			ort000760	603.509	12.8858	6.76658	1.90433	0.0568667	0.999594			ort008172	200.496	-3.77416	1.91561	-1.97022	0.0488137	0.876356			ort002738	148.976	4.11059	2.07113	1.98471	0.0471772	0.804258			ort011098	599.179	-3.12956	1.568	-1.99589
ort000339	1515.38	-4.87022	2.15069	-2.26449	0.0235438	NA			ort003155	37.4729	-6.28952	3.29503	-1.90879	0.0562896	0.99619			ort000483	31.1975	-8.1993	4.30859	-1.90301	0.0570391	NA			ort007789	173.736	3.90465	1.98224	1.96982	0.0488595	0.876356			ort003082	1712.3	-2.79306	1.40778	-1.98402	0.0472538	0.804258			ort007647	833.509	-3.01753	1.51245	-1.99513
ort001486	64.8692	-5.55174	2.45262	-2.26359	0.0235991	NA			ort010418	1888.31	2.16869	1.13617	1.90876	0.0562928	0.99619			ort007116	31.1975	-8.1993	4.30859	-1.90301	0.0570391	NA			ort004876	958.419	-2.96597	1.50578	-1.96972	0.04887	0.876356			ort011197	2555	2.7372	1.37988	1.98365	0.0472948	0.804258			ort005497	68.1792	-5.33717	2.6751	-1.99513
ort001075	1853.33	-4.86205	2.14796	-2.26357	0.0236007	0.0905511			ort000387	39.3125	6.19716	3.24986	1.9069	0.0565333	0.99619			ort007309	67.364	4.91136	2.58156	1.90247	0.0571091	NA			ort004619	64.2916	-5.37049	2.72872	-1.96813	0.0490529	NA			ort001103	1037.2	-2.89171	1.45927	-1.98161	0.0475228	0.806035			ort002133	207.94	-3.76322	1.8864	-1.99492
ort005999	113.86	6.24947	2.7612	2.26331	0.0236163	NA			ort003393	183.457	3.2506	1.70565	1.90578	0.0566787	0.99619			ort003186	179.745	3.48553	1.83419	1.90032	0.0573915	NA			ort004395	356.115	-3.34708	1.70283	-1.9656	0.0493448	0.881086			ort001764	32.608	-8.49681	4.29045	-1.9804	0.0476585	NA			ort001990	364.123	-3.35749	1.68434	-1.99335
ort011254	2665.25	-4.85201	2.14434	-2.2627	0.0236542	0.0905511			ort003845	424.892	-2.62916	1.38018	-1.90494	0.0567873	0.99619			ort004876	1077.82	-2.40321	1.26508	-1.89964	0.0574801	0.999594			ort007481	208.427	-3.72353	1.89498	-1.96494	0.0494207	0.881086			ort000355	1964.17	2.76301	1.39528	1.98025	0.0476753	0.806528			ort008737	76.4748	-5.08104	2.54947	-1.99298
ort005649	1216.05	-4.86729	2.15291	-2.26079	0.0237722	NA			ort008352	1739.68	2.17411	1.14143	1.90472	0.0568165	0.99619			ort005880	433.082	-2.78684	1.4675	-1.89903	0.0575601	0.999594			ort011098	754.682	-3.01759	1.53658	-1.96384	0.049549	0.881086			ort003645	66.7885	5.41598	2.73564	1.97978	0.0477282	NA			ort007859	84.3148	-4.8942	2.45629	-1.99252
ort002366	4689.02	-4.83465	2.14	-2.25918	0.0238723	0.0909127			ort005493	26.4866	8.08955	4.24727	1.90465	0.0568259	0.99619			ort007370	367.091	-2.88196	1.52	-1.89602	0.0579573	0.999594			ort000482	92.5118	-4.65128	2.37295	-1.96013	0.0499807	NA			ort005294	1136.5	-2.8565	1.44526	-1.97647	0.0481021	0.810445			ort009015	5349.54	2.75347	1.38192	1.9925
ort002844	425.65	-4.92768	2.18297	-2.25732	0.0239879	NA			ort010990	1419.18	-2.21085	1.16081	-1.90458	0.0568351	0.99619			ort001080	66.787	4.89853	2.58436	1.89545	0.0580325	NA			ort010243	31.6343	-8.40933	4.2927	-1.95898	0.0501149	NA			ort000205	133.735	-4.20692	2.12985	-1.97522	0.0482437	0.810445			ort008779	958.398	13.4803	6.76653	1.99221
ort006321	866.118	-4.87181	2.15856	-2.25697	0.0240097	NA			ort000498	83.6883	4.23197	2.2231	1.90363	0.0569579	0.99619			ort000649	54.381	5.35169	2.82513	1.89431	0.0581833	NA			ort005662	70.2576	5.10996	2.61307	1.95554	0.0505196	NA			ort006547	3713.3	2.68126	1.35767	1.9749	0.0482792	0.810445			ort001496	388.841	3.31315	1.6635	1.99167
ort011150	656.647	-4.88499	2.16566	-2.25566	0.0240921	NA			ort007319	1093.44	2.26631	1.19104	1.9028	0.057066	0.99619			ort000715	150.918	-3.6743	1.93973	-1.89423	0.058194	NA			ort001093	44.9914	-6.45859	3.30442	-1.95453	0.0506384	NA			ort010304	2672.48	-2.70778	1.37227	-1.97321	0.048472	0.811595			ort000026	1143.37	-13.4671	6.76653	-1.99025
ort008113	47.898	7.46173	3.31192	2.253	0.0242595	NA			ort011081	63.679	-4.69634	2.46896	-1.90215	0.0571512	0.99619			ort004831	39.0902	6.47914	3.42061	1.89415	0.0582056	NA			ort007647	801.317	-2.97284	1.52147	-1.95393	0.0507099	0.897704			ort011580	72.7833	-5.17319	2.62362	-1.97177	0.0486353	NA			ort003631	5591.12	-2.74238	1.37901	-1.98867
ort007967	149.356	5.631	2.5005	2.25195	0.0243254	NA			ort003325	3980.59	2.07193	1.08951	1.90171	0.0572085	0.99619			ort007379	106.728	-4.12909	2.18079	-1.89339	0.0583061	NA			ort011595	174.736	3.84499	1.9683	1.95346	0.0507655	0.897704			ort003446	56.0074	-5.80912	2.95035	-1.96896	0.0489578	NA			ort001890	1016.36	2.94712	1.48214	1.98842
ort000317	35.9581	-6.12546	2.72148	-2.25079	0.0243991	NA			ort011263	932.439	-2.30393	1.21233	-1.90042	0.0573777	0.99619			ort006891	189.041	-3.41974	1.80772	-1.89174	0.0585253	NA			ort003257	2804.46	-2.74208	1.40611	-1.95012	0.0511622	0.902212			ort010961	6999.22	2.62699	1.33519	1.9675	0.0491252	0.820428			ort004676	91.2433	-4.73981	2.38407	-1.98811
ort001669	35.9581	-6.12546	2.72148	-2.25079	0.0243991	NA			ort007528	192.137	3.18544	1.67849	1.8978	0.0577222	0.99619			ort007320	1132.83	2.36908	1.25284	1.89097	0.0586281	0.999594			ort001321	31.14	-8.38661	4.30418	-1.94848	0.0513578	NA			ort000166	6292.43	2.62769	1.33676	1.96572	0.0493309	0.821763			ort010154	373.06	-3.31731	1.6722	-1.98379
ort007876	35.9581	-6.12546	2.72148	-2.25079	0.0243991	NA			ort006342	38.8395	6.17945	3.25613	1.89779	0.057724	0.99619			ort003205	121.892	-3.93079	2.07938	-1.89037	0.0587084	NA			ort004909	3376.34	2.71653	1.39577	1.94626	0.0516239	0.905791			ort004837	100.739	4.56773	2.32551	1.96418	0.049509	NA			ort010064	905.638	-2.95994	1.4938	-1.98149
ort003273	1034.86	-4.84199	2.1525	-2.24948	0.0244821	NA			ort009858	735.214	2.37351	1.25098	1.89731	0.0577864	0.99619			ort005830	477.701	-2.70636	1.43283	-1.88883	0.0589148	0.999594			ort001686	76.3154	4.90104	2.52102	1.94407	0.0518872	NA			ort002502	272.226	-3.46736	1.76747	-1.96176	0.0497903	0.827305			ort007224	2232.53	2.79496	1.41079	1.98112
ort000605	23.8028	-7.12544	3.17021	-2.24762	0.0246003	NA			ort001471	3150.84	2.08346	1.09824	1.89709	0.0578163	0.99619			ort009513	785.846	2.47182	1.31122	1.88513	0.0594128	0.999594			ort006044	1503.44	-2.80541	1.44313	-1.94397	0.0518991	0.905791			ort003853	278.589	3.44449	1.75794	1.95939	0.050067	0.829363			ort011595	270.388	3.50604	1.77037	1.9804
ort006524	23.8028	-7.12544	3.17021	-2.24762	0.0246003	NA			ort004938	9998.53	2.01638	1.06294	1.89699	0.0578293	0.99619			ort004938	12689.4	2.08913	1.1085	1.88466	0.0594763	0.999594			ort000279	324.033	3.33788	1.71729	1.94369	0.0519333	0.905791			ort000918	389.847	-3.22004	1.64493	-1.95756	0.0502821	0.829363			ort002498	1137.27	2.89912	1.46464	1.97941
ort003639	1670.2	-4.81736	2.1442	-2.24669	0.0246595	0.0934266			ort004978	637.826	-2.4225	1.27764	-1.89607	0.0579508	0.99619			ort007684	3807.33	2.15081	1.14217	1.88309	0.0596885	0.999594			ort010154	475.617	-3.13674	1.61381	-1.94368	0.0519343	0.905791			ort004245	322.466	3.3368	1.70467	1.95744	0.0502952	0.829363			ort008928	30.1728	8.4915	4.29302	1.97798
ort004540	626.428	-4.86245	2.16442	-2.24654	0.0246695	NA			ort000013	261.942	2.91538	1.53928	1.89398	0.0582272	0.99619			ort008566	2269.52	-2.21018	1.17407	-1.88249	0.0597694	0.999594			ort002485	1846.65	2.762	1.42432	1.93917	0.0524804	0.910397			ort000058	128.311	4.19944	2.14632	1.95658	0.0503974	NA			ort009577	115.767	-4.32926	2.19414	-1.9731
ort008294	202.547	-5.01084	2.23163	-2.24537	0.0247443	NA			ort002694	46.4627	5.42459	2.8736	1.88773	0.0590618	0.99619			ort011475	391.349	-2.80317	1.49015	-1.88113	0.0599545	0.999594			ort003596	290.238	3.39416	1.75035	1.93914	0.0524844	0.910397			ort005615	1128.22	-2.80398	1.435	-1.95398	0.0507031	0.832901			ort003779	87.1252	4.71765	2.39183	1.9724
ort002748	113.829	-5.18438	2.30916	-2.24513	0.0247595	NA			ort005207	56.8632	-4.86072	2.57787	-1.88555	0.0593551	0.99619			ort006860	240.882	-3.16032	1.68041	-1.88068	0.0600149	0.999594			ort008231	30.6457	-8.36352	4.31599	-1.9378	0.0526477	NA			ort002633	593.593	-3.00501	1.5383	-1.95346	0.0507649	0.832901			ort008126	124.328	4.20846	2.136	1.97026
ort007785	483.426	4.98768	2.22191	2.24477	0.0247826	NA			ort009871	182.094	3.191	1.69636	1.88109	0.0599602	0.99619			ort010245	1855.68	-2.23655	1.18989	-1.87962	0.0601599	0.999594			ort005075	52.5782	5.70555	2.94518	1.93725	0.0527145	NA			ort008172	261.055	-3.47137	1.77837	-1.95199	0.0509388	0.83366			ort009800	806.166	-2.96335	1.50423	-1.97002
ort003706	47.0517	7.43602	3.3138	2.24396	0.0248353	NA			ort002659	43.7601	-5.50011	2.92393	-1.88107	0.0599624	0.99619			ort007237	2283.32	2.19977	1.17126	1.87813	0.060363	0.999594			ort008142	239.671	-3.51978	1.81833	-1.93572	0.0529021	0.91228			ort011517	525.151	3.05063	1.56395	1.95059	0.0511053	0.834293			ort004987	60.067	5.4241	2.75498	1.96884
ort002877	481.565	4.98194	2.22143	2.24268	0.0249178	NA			ort007119	548.218	-2.45294	1.3041	-1.88095	0.0599789	0.99619			ort009042	1277.84	2.30969	1.22992	1.87791	0.0603932	0.999594			ort009183	613.455	3.01062	1.55549	1.93547	0.0529324	0.91228			ort010420	283.87	-3.40195	1.74503	-1.94951	0.0512347	0.83432			ort006449	60.067	5.4241	2.75498	1.96884
ort006499	1551.26	-4.80754	2.14388	-2.24245	0.0249324	0.0939758			ort009548	154.216	3.35355	1.78425	1.87952	0.0601733	0.99619			ort002700	70.6821	4.71079	2.50984	1.87693	0.0605283	NA			ort000576	85170.2	2.61228	1.3502	1.93473	0.0530229	0.91228			ort009809	31.0795	-8.42754	4.32976	-1.94642	0.0516039	NA			ort009387	663.106	-3.0158	1.53363	-1.96645
ort005038	2082.77	-4.79447	2.13995	-2.24045	0.0250614	0.0939803			ort011673	45.9897	5.40948	2.87829	1.87941	0.0601887	0.99619			ort001089	27.1175	8.41021	4.48233	1.8763	0.0606139	NA			ort008324	105.593	4.34785	2.24998	1.9324	0.0533105	NA			ort001419	718.022	2.91476	1.49787	1.94593	0.0516626	0.839195			ort004282	67.1058	5.16242	2.62697	1.96516
ort001252	48858.3	-4.76513	2.12973	-2.23744	0.0252579	0.0942364			ort000576	44031.4	1.96045	1.04317	1.87933	0.0601998	0.99619			ort005782	27.1175	8.41021	4.48233	1.8763	0.0606139	NA			ort005617	923.865	-2.8759	1.48856	-1.932	0.0533593	0.915593			ort008953	102.24	-4.4693	2.29762	-1.94519	0.0517523	NA			ort001379	6639.72	2.67548	1.3626	1.96352
ort001984	92.4725	-5.24886	2.34697	-2.23644	0.0253229	NA			ort003066	784.799	-2.31284	1.23094	-1.87893	0.0602542	0.99619			ort006128	720.201	2.48434	1.32417	1.87614	0.0606357	0.999594			ort003468	42.9799	6.42541	3.32713	1.93122	0.0534561	NA			ort003470	31.4033	8.3882	4.31484	1.94403	0.0518913	NA			ort009884	4377.21	2.69098	1.37198	1.96138
ort002553	2247.42	-4.77784	2.13766	-2.23508	0.0254121	0.0943328			ort003412	4349.6	-2.0229	1.07682	-1.87858	0.0603019	0.99619			ort000034	29.8976	-8.13789	4.34515	-1.87287	0.0610865	NA			ort011581	778.397	13.063	6.76654	1.93053	0.0535416	0.916252			ort008881	91.8883	4.63017	2.38411	1.9421	0.0521252	NA			ort001544	251.342	-3.50873	1.78919	-1.96107
ort010878	755.582	-4.81646	2.15533	-2.23467	0.0254389	NA			ort007224	1621.77	2.13499	1.13681	1.87805	0.0603741	0.99619			ort007294	114.382	-3.95607	2.11306	-1.8722	0.0611795	NA			ort008558	60.8316	-5.2887	2.74411	-1.92729	0.0539436	NA			ort007647	791.678	-2.87118	1.47883	-1.94152	0.0521948	0.845087			ort006276	509.834	-3.1011	1.58191	-1.96035
ort009326	1708.69	-4.77387	2.13942	-2.23139	0.0256554	0.0945033			ort008815	25.5406	8.03708	4.27961	1.878	0.0603818	0.99619			ort007819	1590.64	2.24638	1.20071	1.87087	0.061363	0.999594			ort010479	82.1203	-4.70375	2.44183	-1.92632	0.0540642	NA			ort010648	233.655	-3.52746	1.81754	-1.94079	0.0522841	0.845087			ort007132	10385.3	2.65313	1.35356	1.96011
ort003412	6366.63	-4.752	2.13048	-2.23049	0.0257152	0.0945033			ort007690	354.114	2.6695	1.42267	1.8764	0.0606001	0.99619			ort004851	513.502	12.6528	6.76661	1.86989	0.0614986	0.999594			ort003961	847.527	-2.88329	1.49697	-1.92609	0.0540934	0.922113			ort001915	200.178	-3.65519	1.88566	-1.93841	0.0525735	0.847667			ort002465	446.688	3.15398	1.61014	1.95882
ort011374	659.309	-4.81094	2.15773	-2.22963	0.0257721	NA			ort007733	257.212	2.88557	1.53793	1.87626	0.0606191	0.99619			ort000524	325.501	-2.89145	1.54789	-1.868	0.0617621	0.999594			ort000419	29.8411	8.35832	4.34022	1.92578	0.0541315	NA			ort007947	45.1611	6.45341	3.33138	1.93716	0.0527257	NA			ort007678	1197.21	2.83462	1.44802	1.95758
ort005775	1339.85	-4.76934	2.14143	-2.22717	0.0259358	NA			ort011057	389.978	-2.61068	1.39175	-1.87582	0.0606795	0.99619			ort002485	2448.81	2.16402	1.16001	1.86553	0.0621074	0.999594			ort007888	2277.64	-2.70161	1.40311	-1.92544	0.0541738	0.922113			ort010159	45.1611	6.45341	3.33138	1.93716	0.0527257	NA			ort011128	141.751	-4.0202	2.05587	-1.95547
ort010923	1879.42	-4.75705	2.13682	-2.22623	0.0259991	0.0950712			ort001410	120.135	3.62872	1.93453	1.87576	0.0606876	0.99619			ort000762	468.583	2.65695	1.42435	1.86538	0.0621286	0.999594			ort007183	686.884	-2.93546	1.52736	-1.92192	0.0546156	0.925773			ort011005	286.889	-3.35666	1.73381	-1.93601	0.0528669	0.848913			ort001227	1003.04	-2.86256	1.46579	-1.95291
ort004828	28042.7	-4.72861	2.12613	-2.22404	0.0261457	0.0951342			ort005617	679.89	-2.35527	1.25586	-1.87542	0.0607346	0.99619			ort011180	508.743	-2.61137	1.4016	-1.86313	0.0624437	0.999594			ort007972	218.371	-3.54823	1.84668	-1.92141	0.0546796	0.925773			ort008468	1098.68	-2.7659	1.42909	-1.93543	0.0529372	0.848913			ort001695	1555.14	-2.77662	1.42186	-1.9528
ort010474	199.762	-4.94945	2.2259	-2.22357	0.0261773	NA			ort003500	278.726	-2.82224	1.50496	-1.87529	0.060753	0.99619			ort006671	80.1558	-4.46947	2.40243	-1.8604	0.0628293	NA			ort000382	204.496	-3.59004	1.87217	-1.91758	0.0551647	0.926841			ort006091	30.57	-8.40369	4.34361	-1.93473	0.053024	NA			ort004759	396.226	-3.19731	1.63822	-1.9517
ort000022	55.8374	-5.52758	2.48624	-2.22326	0.026198	NA			ort009635	70.8068	4.41456	2.35423	1.87516	0.0607704	0.99619			ort007299	277.27	-2.98171	1.60538	-1.85733	0.0632646	0.999594			ort008141	282.812	-3.34809	1.746	-1.91757	0.055165	0.926841			ort008425	419.166	3.1175	1.61203	1.9339	0.0531255	0.848913			ort006321	629.83	-2.99444	1.53479	-1.95104
ort007294	104.797	-5.14654	2.3161	-2.22207	0.0262786	NA			ort004340	473.803	2.50829	1.33772	1.87505	0.0607858	0.99619			ort008446	73.5126	-4.61362	2.48474	-1.85678	0.0633425	NA			ort010304	1137.16	-2.79005	1.45507	-1.91746	0.0551795	0.926841			ort008615	865.091	2.82484	1.46097	1.93353	0.0531708	0.848913			ort010733	72.4989	4.94568	2.53605	1.95016
ort005834	7005.06	-4.72791	2.12772	-2.22205	0.0262797	0.0951508			ort005565	1252.98	-2.17601	1.16152	-1.87342	0.06101	0.99619			ort007266	42.1737	-6.17174	3.32664	-1.85524	0.0635614	NA			ort001547	29.3353	8.33366	4.35324	1.91436	0.0555747	NA			ort001864	30.9126	8.36548	4.32794	1.9329	0.0532482	NA			ort009809	30.9882	-8.26233	4.24045	-1.94846
ort001991	747.058	-4.7801	2.15171	-2.22153	0.026315	NA			ort008142	192.179	-3.11672	1.66376	-1.87331	0.0610262	0.99619			ort002496	107.469	3.95744	2.13378	1.85466	0.0636445	NA			ort008490	29.3353	8.33366	4.35324	1.91436	0.0555747	NA			ort001550	202.707	-3.62365	1.8759	-1.93168	0.0533989	0.850474			ort007765	55.3265	-5.62711	2.88806	-1.94841
ort001975	1480.02	-4.74674	2.13795	-2.22023	0.0264034	NA			ort005926	468.013	-2.50737	1.33917	-1.87234	0.06116	0.99619			ort005440	720.783	2.43242	1.31243	1.85337	0.0638297	0.999594			ort008960	104.409	-4.29591	2.24466	-1.91384	0.0556406	NA			ort005495	650.517	2.90917	1.50783	1.92937	0.0536847	0.852297			ort005236	64.0778	-5.24537	2.69361	-1.94734
ort002945	13.2939	-8.73799	3.93675	-2.21959	0.0264463	NA			ort009958	24.3142	-8.12639	4.34299	-1.87115	0.0613243	0.99619			ort010064	907.131	-2.34877	1.26868	-1.85134	0.0641203	0.999594			ort000013	271.547	3.35215	1.75511	1.90994	0.056141	0.9403			ort004423	943.069	2.78871	1.44594	1.92865	0.0537743	0.852297			ort001130	228.641	-3.53969	1.81815	-1.94687
ort007944	13.2939	-8.73799	3.93675	-2.21959	0.0264463	NA			ort002700	45.5167	5.39422	2.88307	1.871	0.061345	0.99619			ort007690	489.361	2.599	1.40435	1.85068	0.0642162	0.999594			ort003308	86.5804	-4.55175	2.38328	-1.90987	0.0561499	NA			ort004505	539.265	-2.97508	1.5448	-1.92587	0.0541212	0.855717			ort007485	232.637	3.51741	1.80744	1.94608
ort008664	13.2939	-8.73799	3.93675	-2.21959	0.0264463	NA			ort005936	1418.06	2.14401	1.14657	1.86992	0.0614944	0.99619			ort003543	5794.97	2.05443	1.11026	1.8504	0.0642557	0.999594			ort010562	50.5551	5.64783	2.95843	1.90906	0.056254	NA			ort003107	684.581	2.87687	1.49526	1.92399	0.0543555	0.857346			ort003990	65.46	5.12559	2.63433	1.94569
ort006814	267.293	-4.87626	2.19874	-2.21775	0.0265718	NA			ort007966	64.6025	4.55114	2.43838	1.86646	0.0619765	0.99619			ort010247	467.345	12.517	6.76663	1.84981	0.0643412	0.999594			ort008983	239.775	3.43717	1.80061	1.90889	0.0562762	0.9403			ort004159	258.434	3.39615	1.76664	1.92238	0.0545576	0.857822			ort005224	291.496	3.35361	1.72447	1.94472
ort009155	641.584	-4.7702	2.15405	-2.21453	0.0267923	NA			ort001103	770.11	-2.29259	1.22868	-1.86589	0.0620565	0.99619			ort006018	825.258	-2.37626	1.28476	-1.84957	0.064375	0.999594			ort009845	231.199	3.45857	1.81368	1.90694	0.0565286	0.942044			ort009550	93.5975	-4.5137	2.35002	-1.92071	0.0547687	NA			ort006671	105.649	-4.3503	2.23737	-1.94438
ort003266	28.4034	-6.37338	2.87805	-2.21448	0.0267958	NA			ort002662	499.009	2.46228	1.32015	1.86516	0.0621595	0.99619			ort005849	1574.38	-2.2026	1.19143	-1.84871	0.0645004	0.999594			ort010525	1392.69	2.71681	1.42697	1.9039	0.0569227	0.944156			ort009690	2605.09	-2.58818	1.34806	-1.91992	0.0548677	0.857822			ort000166	5233.68	2.63974	1.35818	1.94359
ort004720	670.833	-4.76072	2.15199	-2.21224	0.0269502	NA			ort009022	482.594	2.47729	1.32842	1.86483	0.0622048	0.99619			ort006248	153.923	3.49178	1.8902	1.84731	0.0647029	NA			ort008601	28.8295	8.30857	4.36666	1.90273	0.0570762	NA			ort003393	418.713	3.07829	1.6044	1.91865	0.0550288	0.857822			ort001011	777.799	2.89714	1.49325	1.94015
ort001042	2896.87	-4.70968	2.12893	-2.21223	0.0269511	0.0970435			ort007578	204.768	3.03981	1.63068	1.86414	0.0623022	0.99619			ort007988	1230.81	2.25151	1.21939	1.84642	0.0648306	0.999594			ort010598	28.8295	8.30857	4.36666	1.90273	0.0570762	NA			ort001071	1212.53	-2.70288	1.40906	-1.91821	0.0550838	0.857822			ort005782	28.527	8.41058	4.33819	1.93873
ort011444	807.372	-4.74929	2.1469	-2.21216	0.0269556	NA			ort009690	699.837	-2.31917	1.24491	-1.86292	0.0624738	0.99619			ort000417	263.137	2.98744	1.61805	1.84632	0.0648455	0.999594			ort004576	333.057	3.20309	1.68349	1.90266	0.0570854	0.944156			ort007319	1307.77	2.68704	1.40087	1.91812	0.0550961	0.857822			ort002692	203.663	3.60223	1.85826	1.9385
ort007272	2306.52	-4.70853	2.13018	-2.21039	0.0270779	0.0970435			ort008957	832.511	-2.26001	1.21376	-1.86199	0.0626044	0.99619			ort011648	25.9636	8.34747	4.52262	1.84572	0.0649332	NA			ort002700	50.0493	5.63304	2.96198	1.90178	0.0571998	NA			ort010430	1782.92	-2.63114	1.37217	-1.9175	0.0551739	0.857822			ort009668	1694.27	2.72653	1.40709	1.93772
ort010034	2217.8	-4.70447	2.13002	-2.20866	0.0271986	0.0970435			ort010243	55.2774	-4.81849	2.5888	-1.86128	0.0627047	0.99619			ort001379	3829.16	2.07404	1.12405	1.84515	0.0650159	0.999594			ort005572	280.352	-3.30281	1.73815	-1.90019	0.0574078	0.944156			ort004667	74.8024	-4.88208	2.54679	-1.91695	0.0552441	NA			ort000205	138.562	-3.98531	2.05717	-1.93728
ort001476	43.836	7.33388	3.32191	2.20773	0.0272631	NA			ort007722	958.424	-2.21551	1.19108	-1.86009	0.0628728	0.99619			ort006956	617.905	-2.47773	1.343	-1.84492	0.0650498	0.999594			ort007819	1225.31	2.72848	1.43665	1.89919	0.0575392	0.944156			ort008507	100.758	4.39046	2.29123	1.9162	0.0553394	NA			ort005932	2315.18	2.68426	1.38616	1.93647
ort007754	39.0815	-5.82591	2.6403	-2.20654	0.0273465	NA			ort001728	197.562	3.06077	1.64554	1.86004	0.0628797	0.99619			ort004353	429.322	-2.65421	1.44012	-1.84305	0.0653223	0.999594			ort005880	271.926	-3.31788	1.74771	-1.89842	0.0576411	0.944156			ort010990	4366.74	-2.5357	1.32352	-1.91587	0.0553814	0.859003			ort002168	63.1664	-5.22416	2.69805	-1.93627
ort009859	528.386	-4.76152	2.15819	-2.20625	0.0273662	NA			ort007268	1243.35	2.15222	1.15708	1.86004	0.0628806	0.99619			ort003936	405.393	2.68378	1.45625	1.84293	0.0653389	0.999594			ort008022	495.895	2.99234	1.5766	1.89797	0.0577004	0.944156			ort010296	213.841	-3.51746	1.84	-1.91166	0.0559198	0.864581			ort001429	164.09	-3.80272	1.964	-1.93622
ort008416	22.3257	-7.03233	3.18853	-2.20551	0.0274186	NA			ort008696	10149.8	1.94865	1.04793	1.85952	0.062953	0.99619			ort005042	168.206	3.38095	1.83557	1.84191	0.0654886	NA			ort006190	881.024	2.79852	1.47478	1.89759	0.0577506	0.944156			ort007819	1617.23	2.63172	1.37715	1.91099	0.0560058	0.864581			ort009669	133	-4.02826	2.08062	-1.93609
ort008448	22.3257	-7.03233	3.18853	-2.20551	0.0274186	NA			ort008812	2492.75	-2.03111	1.09461	-1.85555	0.063517	0.99619			ort000436	28.5977	-8.07376	4.38362	-1.8418	0.0655042	NA			ort007052	289.686	3.2714	1.72461	1.89689	0.0578418	0.944156			ort004530	75.6583	4.84291	2.53458	1.91073	0.0560388	NA			ort004966	6530.4	2.61159	1.34908	1.93583
ort002387	1119.41	-4.71242	2.13768	-2.20446	0.0274919	NA			ort010522	23.7856	-8.09468	4.36364	-1.85503	0.0635922	0.99619			ort004505	484.337	-2.58385	1.40355	-1.84093	0.0656311	0.999594			ort007268	3057.47	2.59578	1.37057	1.89395	0.0582322	0.94791			ort008601	29.9313	8.31894	4.35492	1.91024	0.0561025	NA			ort003645	88.6781	4.54374	2.34871	1.93457
ort008844	665.094	-4.73729	2.14965	-2.20375	0.0275417	NA			ort007388	725.726	2.29063	1.23496	1.85482	0.063622	0.99619			ort009922	518.362	2.545	1.38315	1.84	0.0657676	0.999594			ort001059	28.6685	-8.26731	4.3665	-1.89335	0.0583118	NA			ort010598	29.9313	8.31894	4.35492	1.91024	0.0561025	NA			ort003316	1741.99	-2.71377	1.40335	-1.93378
ort003879	1689.08	-4.69481	2.13117	-2.20293	0.0276	0.0979999			ort005391	691.964	-2.30659	1.24359	-1.85479	0.0636269	0.99619			ort002190	582.67	-2.48555	1.35301	-1.83705	0.0662029	0.999594			ort006496	230.682	3.41514	1.80504	1.89201	0.0584899	0.94791			ort011241	1517.9	-2.63869	1.38184	-1.90955	0.0561911	0.865358			ort008692	1247.82	2.76578	1.43104	1.9327
ort000918	838.607	-4.72104	2.14314	-2.20286	0.0276048	NA			ort006486	608.81	-2.35061	1.2686	-1.85292	0.0638944	0.99619			ort006825	477.532	2.57899	1.404	1.8369	0.0662254	0.999594			ort004253	193.61	-3.55577	1.87958	-1.89179	0.0585185	0.94791			ort007280	8523.14	2.48651	1.30321	1.90799	0.0563924	0.865358			ort011144	70.8531	4.91147	2.5422	1.93198
ort003781	210.779	-4.87646	2.21393	-2.20262	0.0276214	NA			ort009505	1505.65	2.09924	1.13333	1.85229	0.0639846	0.99619			ort006302	56.5452	4.98296	2.71429	1.83582	0.0663836	NA			ort005465	129.802	3.94605	2.08635	1.89137	0.058575	NA			ort000744	97.6547	-4.40004	2.30663	-1.90756	0.0564479	NA			ort008268	335.869	-3.22908	1.67327	-1.9298
ort003528	533.155	-4.74825	2.15651	-2.20182	0.0276779	NA			ort007879	471.132	2.46103	1.32887	1.85196	0.0640311	0.99619			ort005449	614.164	2.45213	1.33749	1.83338	0.0667459	0.999594			ort003831	90.0519	-4.40973	2.33456	-1.88889	0.0589061	NA			ort004925	1042.88	2.71217	1.42183	1.90752	0.0564537	0.865358			ort008172	310.703	-3.27589	1.69753	-1.92979
ort009087	1233.45	-4.69439	2.13444	-2.19935	0.027853	NA			ort004331	855.319	2.23199	1.20532	1.85178	0.0640574	0.99619			ort009548	135.601	3.58971	1.95912	1.83231	0.0669053	NA			ort001233	575.9	-2.90635	1.53949	-1.88786	0.0590442	0.952159			ort002485	2823.86	2.54867	1.33717	1.90602	0.0566483	0.865692			ort002326	873.481	2.83924	1.47128	1.92978
ort008787	6359.49	-4.66383	2.12114	-2.19874	0.0278967	0.0983939			ort005501	68.9149	4.37363	2.36246	1.8513	0.0641259	0.99619			ort011032	109.182	-3.88452	2.12007	-1.83226	0.0669124	NA			ort001429	886.851	-2.77141	1.46822	-1.8876	0.05908	0.952159			ort003316	1828.85	-2.59908	1.36413	-1.9053	0.0567406	0.865692			ort004938	20596.5	2.57008	1.33193	1.9296
ort006778	422.742	-4.75828	2.16506	-2.19776	0.0279662	NA			ort008358	24.5947	7.98263	4.31406	1.85038	0.0642594	0.99619			ort004082	266.294	-2.94639	1.60807	-1.83225	0.0669139	0.999594			ort003685	1595.6	-2.64821	1.40469	-1.88526	0.0593942	0.954807			ort005088	85.9738	-4.58676	2.40859	-1.90434	0.0568665	NA			ort005948	3788.1	2.62001	1.35957	1.92709
ort002364	42.9897	7.30576	3.32433	2.19766	0.0279731	NA			ort007555	372.643	2.5802	1.39453	1.85023	0.0642806	0.99619			ort009993	1626.58	2.16099	1.17963	1.83192	0.0669633	0.999594			ort003330	39.9452	6.3185	3.35803	1.88161	0.0598889	NA			ort002634	268.585	-3.31431	1.74097	-1.90372	0.0569469	0.866814			ort004953	1956.73	2.67878	1.39104	1.92575
ort006516	43.6821	-5.66153	2.57696	-2.19698	0.0280219	NA			ort007303	421.276	-2.51018	1.35734	-1.84933	0.0644103	0.99619			ort006475	49.6834	-5.39415	2.94626	-1.83084	0.0671237	NA			ort007237	2440.88	2.58367	1.37389	1.88055	0.0600326	0.961529			ort002307	238.165	-3.40006	1.78785	-1.90176	0.0572025	0.867704			ort001503	4555.96	2.60298	1.35247	1.92461
ort008626	1858.84	-4.67398	2.12808	-2.19634	0.0280678	0.0983939			ort010286	612.242	2.34039	1.26597	1.8487	0.0645009	0.99619			ort008811	35.6284	6.34379	3.47076	1.82778	0.0675822	NA			ort001544	210.968	-3.44855	1.83438	-1.87995	0.0601145	0.961529			ort005026	570.217	2.89041	1.52028	1.90124	0.0572711	0.867704			ort008832	3357.42	-2.62047	1.36239	-1.92344
ort011530	1313.65	-4.68208	2.13237	-2.19571	0.0281124	NA			ort004175	463.089	-2.45524	1.33013	-1.84587	0.0649112	0.99619			ort003800	55.9682	4.96769	2.71825	1.82753	0.0676203	NA			ort006416	76.3039	4.6281	2.46211	1.87973	0.0601452	NA			ort005047	112.374	-4.17667	2.19783	-1.90036	0.0573854	NA			ort009303	102.915	-4.31059	2.2412	-1.92334
ort010642	8747.82	-4.65357	2.11939	-2.19571	0.0281126	0.0983939			ort004876	680.975	-2.29298	1.24262	-1.84528	0.0649964	0.99619			ort010133	4423.62	2.0265	1.10928	1.82686	0.0677205	0.999594			ort000540	162.586	3.66737	1.95317	1.87765	0.0604295	0.961773			ort009126	81.0746	4.67359	2.46033	1.89958	0.0574886	NA			ort003066	807.374	-2.84319	1.47915	-1.92218
ort005057	419.788	-4.74778	2.16418	-2.1938	0.0282495	NA			ort001500	91.8956	3.88802	2.10822	1.84422	0.0651508	0.99619			ort003286	556.789	-12.3563	6.76659	-1.82608	0.0678379	0.999594			ort009993	1609.74	2.62606	1.39921	1.87682	0.060543	0.961773			ort006675	257.981	3.32299	1.7528	1.89582	0.0579833	0.87551			ort009898	1145	2.75592	1.43427	1.92148
ort004847	1057.33	-4.68348	2.13535	-2.19331	0.0282852	NA			ort011468	2010.52	2.0328	1.10391	1.84146	0.0655546	0.99619			ort003308	40.4405	-6.11033	3.34739	-1.8254	0.0679404	NA			ort001496	321.929	3.14865	1.67791	1.87653	0.0605829	0.961773			ort001026	224.975	-3.42709	1.80837	-1.89513	0.058075	0.87551			ort010243	77.0234	-4.75912	2.477	-1.92132
ort006474	33.0039	-5.99993	2.73656	-2.19251	0.0283428	NA			ort010501	305.621	2.68097	1.45593	1.84141	0.0655611	0.99619			ort004988	170.803	3.31466	1.81664	1.82461	0.0680595	NA			ort010961	5521.15	2.51011	1.33965	1.8737	0.0609713	0.965531			ort001500	114.063	4.14208	2.18579	1.895	0.0580922	NA			ort004178	384.165	3.11931	1.62659	1.9177
ort005597	48.2826	-5.54051	2.52859	-2.19115	0.028441	NA			ort009303	162.495	-3.18659	1.73215	-1.83967	0.0658164	0.99619			ort001473	3875.06	2.03109	1.11367	1.82379	0.0681842	0.999594			ort009548	117.18	3.99399	2.13449	1.87117	0.0613222	NA			ort000542	59.919	5.25551	2.7739	1.89463	0.0581419	NA			ort003233	414.051	3.08142	1.60692	1.91759
ort007425	3018.77	-4.64163	2.12146	-2.18794	0.0286737	0.0998823			ort009810	23.2571	-8.06226	4.38509	-1.83856	0.0659794	0.99619			ort008828	487.078	-2.53805	1.39246	-1.82271	0.0683471	0.999594			ort007942	48.4629	-5.55172	2.96838	-1.87028	0.0614443	NA			ort009123	130.64	-3.96717	2.09394	-1.89459	0.0581461	NA			ort008953	119.143	-4.09573	2.13655	-1.91699
ort001466	108.09	-5.0273	2.29804	-2.18764	0.0286955	NA			ort001731	534.934	12.4251	6.76657	1.83625	0.0663207	0.99619			ort001268	1540.16	2.15164	1.18081	1.82218	0.0684281	0.999594			ort000689	1058.32	2.68582	1.43605	1.87028	0.0614445	0.969875			ort001702	675.171	12.814	6.76655	1.89373	0.0582611	0.87551			ort000988	2664.99	2.6245	1.36915	1.91689
ort005695	209.471	-4.8312	2.20941	-2.18665	0.028768	NA			ort008646	870.12	2.19543	1.1959	1.83579	0.0663884	0.99619			ort002634	296.328	-2.83839	1.5582	-1.82158	0.0685181	0.999594			ort002603	27.68	-8.21668	4.39429	-1.86985	0.0615044	NA			ort005880	322.29	-3.16218	1.67023	-1.89327	0.0583226	0.87551			ort004422	1183.14	-2.73875	1.42885	-1.91675
ort001848	57.4837	-5.37341	2.45867	-2.18549	0.0288527	NA			ort010683	775.257	-2.22999	1.21477	-1.83573	0.0663977	0.99619			ort003412	5891.16	-1.99744	1.09662	-1.82145	0.0685391	0.999594			ort010990	3357.58	-2.52952	1.35303	-1.86952	0.0615503	0.969875			ort002518	495.748	2.92803	1.54743	1.89219	0.0584659	0.875647			ort000088	826.708	-2.81936	1.47213	-1.91516
ort007516	41.8049	7.26544	3.32794	2.18316	0.0290238	NA			ort005795	1075.49	-2.13787	1.16484	-1.83534	0.0664555	0.99619			ort007280	7881.77	1.98125	1.08824	1.8206	0.068668	0.999594			ort005980	39.5543	-6.27051	3.35766	-1.86753	0.0618282	NA			ort006028	146.089	3.8167	2.02273	1.88691	0.0591727	0.884205			ort008566	2457.72	-2.62748	1.37233	-1.91461
ort005516	1227.25	-4.6486	2.12962	-2.18283	0.0290481	NA			ort008503	1078.59	2.13696	1.16453	1.83505	0.0664988	0.99619			ort004715	27.7311	-8.02936	4.41098	-1.82031	0.0687116	NA			ort007765	39.5543	-6.27051	3.35766	-1.86753	0.0618282	NA			ort008535	28.9499	8.27084	4.38385	1.88666	0.059206	NA			ort002137	389.669	-3.10409	1.62212	-1.91361
ort008827	544.218	4.773	2.18709	2.18235	0.0290836	NA			ort006874	62.2376	4.495	2.45095	1.83398	0.0666569	0.99619			ort011469	5575.57	1.99828	1.09778	1.8203	0.068713	0.999594			ort006485	203.048	-3.43393	1.84118	-1.86507	0.0621713	0.97724			ort005415	41.2507	-6.37614	3.38301	-1.88475	0.0594636	NA			ort000542	62.7171	5.06202	2.64729	1.91215
ort006205	547.803	-4.6864	2.1491	-2.18064	0.0292102	NA			ort001473	3277.1	1.9639	1.07108	1.83356	0.0667189	0.99619			ort001484	2465.72	2.07095	1.13802	1.81979	0.0687917	0.999594			ort010064	1173.15	-2.6487	1.42108	-1.86386	0.0623414	0.977502			ort002866	96.8327	4.33034	2.29887	1.88368	0.0596076	NA			ort008774	803.557	2.81046	1.47237	1.9088
ort006619	472.548	-4.69183	2.1541	-2.17809	0.0293992	NA			ort005019	740.583	2.23842	1.2217	1.83223	0.0669175	0.99619			ort004686	91.7449	4.05697	2.23133	1.81819	0.069035	NA			ort004928	1290.73	-2.62018	1.40901	-1.85958	0.0629444	0.984531			ort001548	77.8406	-4.66897	2.48028	-1.88244	0.0597766	NA			ort010355	39.4061	6.41731	3.36527	1.90692
ort008264	5601.77	-4.60766	2.11549	-2.17806	0.0294017	0.101714			ort002383	603.358	-2.31064	1.26141	-1.83179	0.0669834	0.99619			ort007765	40.0072	-6.09457	3.35293	-1.81769	0.0691121	NA			ort004538	61.6593	4.91578	2.64643	1.85752	0.0632376	NA			ort006816	501.618	-2.89698	1.53927	-1.88204	0.05983	0.891986			ort006956	858.718	-2.78774	1.46231	-1.90639
ort002819	26.9263	-6.29538	2.89051	-2.17795	0.0294096	NA			ort009141	822.134	-2.20387	1.20315	-1.83175	0.066989	0.99619			ort011448	70.5384	4.47612	2.46284	1.81747	0.0691458	NA			ort005830	559.611	-2.835	1.52694	-1.85666	0.0633597	0.986884			ort005207	83.4263	-4.54153	2.41607	-1.87972	0.0601468	NA			ort010206	2616.54	2.60195	1.36488	1.90636
ort006203	6534.3	-4.60379	2.11469	-2.17706	0.0294764	0.101714			ort003699	256.961	2.77422	1.51589	1.83009	0.0672366	0.99619			ort005684	35.0514	6.31994	3.48002	1.81607	0.0693601	NA			ort008371	47.0146	5.54092	2.9847	1.85644	0.0633907	NA			ort004152	1062.28	-2.64167	1.40572	-1.87922	0.0602142	0.895669			ort005490	42.9295	-6.27143	3.29043	-1.90596
ort009397	192.715	-4.81736	2.2141	-2.17576	0.0295729	NA			ort006470	822.35	2.20051	1.20257	1.82984	0.0672738	0.99619			ort002254	675.198	2.37396	1.30736	1.81584	0.0693952	0.999594			ort008957	1181.12	-2.62885	1.41614	-1.85634	0.0634049	0.986884			ort009993	2609.72	2.49439	1.32809	1.87818	0.0603572	0.895755			ort001550	127.987	-3.96937	2.08365	-1.90501
ort006080	42.205	-5.6109	2.58114	-2.17381	0.0297193	NA			ort007036	391.648	-2.50533	1.36932	-1.82961	0.0673078	0.99619			ort006148	4367.51	-2.0047	1.10452	-1.81499	0.0695249	0.999594			ort003494	73.775	4.57747	2.46896	1.85401	0.0637377	NA			ort011468	2628.52	2.48906	1.32672	1.8761	0.0606421	0.896501			ort005781	68.2721	-4.91222	2.57943	-1.90439
ort010131	1672.75	-4.61303	2.12249	-2.17341	0.0297498	0.101867			ort009135	2038.65	2.00793	1.0979	1.82888	0.0674178	0.99619			ort009015	4097.7	2.00802	1.1068	1.81426	0.0696369	0.999594			ort003936	516.46	2.85345	1.5407	1.85205	0.0640188	0.992456			ort011032	82.9168	-4.53231	2.41763	-1.87469	0.060835	NA			ort011180	792.884	-2.80425	1.47265	-1.90423
ort009891	20031.7	-4.58751	2.11137	-2.17277	0.0297978	0.101867			ort011469	4707.01	1.92723	1.05427	1.82802	0.0675468	0.99619			ort003942	2687.06	-2.04976	1.12981	-1.81426	0.0696381	0.999594			ort004245	290.64	3.1375	1.69511	1.85091	0.0641819	0.992456			ort007694	362.588	3.04304	1.62323	1.87468	0.0608362	0.896501			ort000978	3392.15	2.5698	1.35126	1.90178
ort008776	69.8083	-5.18961	2.3913	-2.1702	0.0299914	NA			ort001290	953.473	2.15373	1.17854	1.82746	0.067631	0.99619			ort005147	24.8097	8.28188	4.56608	1.81379	0.0697107	NA			ort007115	38.5657	-6.23352	3.36876	-1.85039	0.0642576	NA			ort005654	294.381	-3.16977	1.69128	-1.87418	0.060906	0.896501			ort006316	320.282	-3.18042	1.67245	-1.90166
ort003700	3523.2	-4.58791	2.115	-2.16923	0.0300655	0.102306			ort000152	7429.26	1.90321	1.04151	1.82735	0.0676465	0.99619			ort010513	24.8097	8.28188	4.56608	1.81379	0.0697107	NA			ort003207	1074.51	-2.63261	1.42297	-1.85007	0.0643028	0.992456			ort006053	321.743	-3.11148	1.66051	-1.87381	0.0609566	0.896501			ort003179	383.744	-3.0794	1.61963	-1.9013
ort011461	100.535	-4.99995	2.30511	-2.16908	0.0300768	NA			ort005177	480.449	-2.3979	1.31228	-1.82728	0.0676581	0.99619			ort011670	24.8097	8.28188	4.56608	1.81379	0.0697107	NA			ort011468	2390.09	2.50559	1.35654	1.84705	0.0647405	0.992456			ort006342	41.2357	6.32066	3.37628	1.87208	0.0611958	NA			ort004499	74.0518	4.70502	2.47509	1.90095
ort000508	56.0066	-5.33493	2.4603	-2.16841	0.0301274	NA			ort006633	612.047	2.29508	1.25651	1.82655	0.0677675	0.99619			ort009241	180.037	3.23075	1.78136	1.81364	0.0697329	NA			ort002377	2416.88	-2.50433	1.35592	-1.84696	0.0647528	0.992456			ort010834	520.319	-2.85203	1.52485	-1.87036	0.0614333	0.900551			ort001233	642.523	-2.85756	1.50441	-1.89945
ort000252	4941.66	-4.57707	2.11259	-2.16657	0.0302679	0.10252			ort005465	149.069	3.2396	1.77466	1.82547	0.0679297	0.99619			ort005948	2694.13	2.04767	1.12911	1.81353	0.0697501	0.999594			ort005514	232.314	-3.27525	1.77378	-1.84648	0.0648229	0.992456			ort000220	4123.38	2.43503	1.30321	1.86849	0.0616939	0.900551			ort007689	410.573	3.03447	1.59869	1.8981
ort007664	345.579	4.8199	2.22565	2.16561	0.0303409	NA			ort003638	600.946	2.2991	1.25964	1.82521	0.0679693	0.99619			ort006321	585.699	-2.42879	1.33955	-1.81314	0.0698096	0.999594			ort004235	2228.83	2.511	1.36005	1.84626	0.0648542	0.992456			ort000174	2891.19	-2.46224	1.31802	-1.86814	0.061743	0.900551			ort000603	126.792	3.94172	2.07708	1.89772
ort005947	40.2817	7.2119	3.33292	2.16383	0.030477	NA			ort010355	49.8291	4.9271	2.69991	1.82491	0.0680141	0.99619			ort006957	2293.01	-2.06636	1.14014	-1.81237	0.0699298	0.999594			ort002775	429.753	2.91149	1.57848	1.84449	0.0651111	0.993249			ort003233	551.099	2.82212	1.51089	1.86785	0.0617836	0.900551			ort004862	28.7096	-8.15215	4.30084	-1.89548
ort006761	1258.53	-4.58712	2.12272	-2.16096	0.0306982	NA			ort009096	572.429	2.3171	1.26995	1.82457	0.0680664	0.99619			ort005306	318.276	-2.75903	1.52428	-1.81006	0.0702872	0.999594			ort000058	99.0066	4.10511	2.22677	1.84352	0.0652527	NA			ort005617	690.985	-2.73408	1.46486	-1.86644	0.0619795	0.901394			ort005025	1925.78	-2.60682	1.37653	-1.89375
ort000102	20.8486	-6.93279	3.20948	-2.1601	0.0307653	NA			ort009992	3729.33	1.93582	1.06146	1.82373	0.0681933	0.99619			ort006552	3621.14	2.0102	1.11062	1.80998	0.0702994	0.999594			ort001015	742.681	-2.70711	1.46877	-1.84311	0.0653122	0.993249			ort003179	315.139	-3.10194	1.66298	-1.8653	0.0621398	0.901718			ort002509	2223.55	2.58749	1.36698	1.89286
ort008424	320.73	-4.6831	2.16831	-2.15979	0.0307886	NA			ort011202	736.866	-2.22194	1.21859	-1.82337	0.0682478	0.99619			ort001129	75.3895	-4.3769	2.41874	-1.80958	0.0703612	NA			ort001873	568.348	2.79284	1.51563	1.84269	0.0653741	0.993249			ort001390	40.745	6.30317	3.38245	1.86349	0.0623931	NA			ort001268	1871.97	2.59599	1.37521	1.8877
ort009305	915.262	-4.59404	2.12801	-2.15885	0.0308621	NA			ort001554	6741.2	1.90009	1.04216	1.82322	0.0682703	0.99619			ort011241	647.355	-2.37818	1.31434	-1.80942	0.0703864	0.999594			ort010984	38.0715	-6.21466	3.37448	-1.84166	0.0655247	NA			ort007602	222.029	3.34679	1.79681	1.86262	0.0625152	0.905154			ort004736	446.122	2.96708	1.57236	1.88702
ort001065	1679.55	-4.56587	2.1174	-2.15635	0.0310561	0.104707			ort007603	23.6487	7.92604	4.35084	1.82173	0.0684964	0.99619			ort009882	3213.26	2.01728	1.11588	1.80779	0.0706385	0.999594			ort011648	26.3006	8.17611	4.44031	1.84134	0.0655722	NA			ort003707	27.9686	8.22109	4.41451	1.86229	0.0625626	NA			ort005147	38.3089	6.37609	3.37909	1.88693
ort008947	832.283	-4.59026	2.12926	-2.1558	0.0310991	NA			ort000389	35.0557	6.02943	3.3115	1.82075	0.0686446	0.99619			ort008520	4521.18	1.98524	1.09906	1.8063	0.070871	0.999594			ort001548	84.6147	-4.31552	2.3443	-1.84085	0.065643	NA			ort010339	27.9686	8.22109	4.41451	1.86229	0.0625626	NA			ort000918	418.489	-2.99538	1.58857	-1.88558
ort002959	371.675	-4.65203	2.15849	-2.15523	0.0311441	NA			ort004312	35.0557	6.02943	3.3115	1.82075	0.0686446	0.99619			ort005932	2672.2	2.03301	1.12598	1.80555	0.0709887	0.999594			ort000426	163.068	3.54704	1.9269	1.8408	0.0656508	0.995079			ort005400	759.898	2.69093	1.44583	1.86117	0.0627199	0.906108			ort008601	26.3326	8.2951	4.40562	1.88285
ort005512	1142.21	-4.568	2.1219	-2.15279	0.0313354	NA			ort001855	213.615	2.89133	1.58912	1.81946	0.0688414	0.99619			ort001957	322.463	-2.73465	1.51601	-1.80384	0.0712558	0.999594			ort005490	60.8431	-4.86159	2.64442	-1.83843	0.0659984	NA			ort008960	86.974	-4.40299	2.36648	-1.86057	0.062805	NA			ort008960	103.463	-4.15859	2.20875	-1.88278
ort002623	259.277	-4.69348	2.18054	-2.15243	0.0313632	NA			ort002465	307.207	2.62652	1.44379	1.81918	0.0688834	0.99619			ort003651	39.1406	-6.06251	3.3643	-1.80201	0.0715437	NA			ort007292	724.346	-2.7	1.46947	-1.83739	0.0661523	0.998198			ort000912	27.513	-8.25169	4.43568	-1.8603	0.0628433	NA			ort005617	675.175	-2.79496	1.48615	-1.88067
ort011359	1667.74	-4.55525	2.11633	-2.15243	0.0313634	0.105261			ort003992	105.361	3.61927	1.99084	1.81796	0.0690696	0.99619			ort008476	1134.83	-2.17789	1.20918	-1.80112	0.0716836	0.999594			ort009405	37.4163	6.22292	3.38699	1.8373	0.0661657	NA			ort001139	283.193	3.15793	1.69811	1.85968	0.0629315	0.906312			ort003879	948.368	-2.69678	1.43529	-1.87892
ort000856	794.002	-4.58212	2.12926	-2.15198	0.0313992	NA			ort010064	1030.17	-2.11281	1.163	-1.81668	0.0692658	0.99619			ort009992	5808.9	1.95882	1.08771	1.80087	0.0717237	0.999594			ort001981	240.211	3.22341	1.75446	1.83727	0.0661702	0.998198			ort000762	896.643	2.63518	1.41839	1.85786	0.0631884	0.906312			ort007888	369.069	-3.03838	1.61794	-1.87793
ort005868	45.3284	-5.4474	2.53486	-2.149	0.0316346	NA			ort008524	32534.6	1.85337	1.0204	1.81631	0.0693233	0.99619			ort003066	788.715	-2.28301	1.26857	-1.79967	0.0719132	0.999594			ort011083	648.951	-2.73058	1.4872	-1.83605	0.0663499	0.998542			ort002471	433.156	-2.9046	1.56361	-1.85762	0.063223	0.906312			ort004235	3723	2.50175	1.33461	1.87452
ort010699	649.4	-4.5798	2.13327	-2.14685	0.0318056	NA			ort007664	480.674	2.37471	1.30771	1.81593	0.0693814	0.99619			ort000357	836.221	-2.26222	1.2574	-1.79913	0.0719974	0.999594			ort007214	384.876	2.93578	1.6007	1.83406	0.0666445	0.999868			ort009659	328.801	-3.05429	1.64461	-1.85715	0.0632892	0.906312			ort006630	212.887	3.37769	1.8024	1.874
ort006363	455.162	-4.60702	2.14616	-2.14664	0.0318222	NA			ort000760	484.799	12.2832	6.76659	1.81527	0.0694832	0.99619			ort010069	26.8645	-7.98356	4.43985	-1.79816	0.0721519	NA			ort003588	102.536	4.02562	2.19515	1.83387	0.0666735	NA			ort004264	115.903	-3.98839	2.14811	-1.85669	0.0633547	NA			ort005177	719.767	-2.75773	1.47195	-1.87353
ort008794	105.305	-4.91208	2.28839	-2.14653	0.031831	NA			ort002018	34.5827	6.00953	3.31915	1.81056	0.0702085	0.99619			ort008990	59.2864	4.72053	2.62531	1.79808	0.0721638	NA			ort003155	26.1971	-8.13724	4.43931	-1.833	0.0668028	NA			ort002168	48.3649	-5.59339	3.01269	-1.85661	0.063367	NA			ort000866	27.7982	-8.1056	4.32719	-1.87318
ort001169	627.874	-4.57874	2.13395	-2.14566	0.0319	NA			ort010520	84.2724	3.90143	2.15558	1.80993	0.0703072	0.99619			ort010058	24.2327	8.24794	4.58912	1.79728	0.072291	NA			ort003185	26.1971	-8.13724	4.43931	-1.833	0.0668028	NA			ort007483	49.1053	5.56035	2.99815	1.8546	0.0636541	NA			ort003257	2599.4	-2.52347	1.34838	-1.87149
ort000826	129.954	-4.83444	2.25316	-2.14562	0.0319032	NA			ort008737	62.0377	-4.38268	2.42294	-1.80883	0.0704778	0.99619			ort001227	918.525	-2.22824	1.23993	-1.79707	0.0723249	0.999594			ort004715	26.1971	-8.13724	4.43931	-1.833	0.0668028	NA			ort000577	8085.44	-2.37059	1.27889	-1.85364	0.0637907	0.909923			ort007635	197.898	3.4245	1.83127	1.87002
ort002734	2333.81	-4.51971	2.1099	-2.14214	0.032182	0.107279			ort002218	75.1747	4.06847	2.25095	1.80745	0.0706927	0.99619			ort003233	353.746	2.6529	1.47667	1.79654	0.0724081	0.999594			ort006898	37.5772	-6.19555	3.38036	-1.83281	0.0668314	NA			ort006708	11541.9	-2.35996	1.27329	-1.85344	0.06382	0.909923			ort001634	1026.34	-2.65716	1.42109	-1.8698
ort003165	3710.12	-4.50772	2.10619	-2.14022	0.0323367	0.107279			ort000248	409.701	2.43453	1.34698	1.80741	0.0706989	0.99619			ort008116	688.908	2.32184	1.29294	1.79578	0.0725291	0.999594			ort009930	77.304	4.41562	2.40974	1.83241	0.0668911	NA			ort010245	2250.38	-2.45358	1.32467	-1.85222	0.0639937	0.910412			ort001022	25.784	8.26473	4.42372	1.86827
ort003540	10572	-4.49807	2.10248	-2.13941	0.0324027	0.107279			ort000372	111.621	3.51375	1.94452	1.807	0.0707622	0.99619			ort008892	8300.53	1.93193	1.0759	1.79564	0.0725524	0.999594			ort001379	4190.29	2.4273	1.32479	1.83221	0.0669204	0.999868			ort007604	192.457	3.43353	1.8553	1.85066	0.0642186	0.910417			ort002329	111737	-2.42328	1.29711	-1.86821
ort001661	11.8168	-8.56806	4.00516	-2.13926	0.0324148	NA			ort010071	155.858	3.14223	1.73966	1.80623	0.0708822	0.99619			ort009690	1324.41	-2.12954	1.18607	-1.79546	0.0725803	0.999594			ort000385	112.858	-3.90091	2.13036	-1.8311	0.0670852	NA			ort001631	1182.06	-2.55171	1.37909	-1.85028	0.064273	0.910417			ort007115	40.6509	-6.1917	3.31551	-1.86749
ort001885	11.8168	-8.56806	4.00516	-2.13926	0.0324148	NA			ort006908	213.671	2.85795	1.58243	1.80605	0.0709103	0.99619			ort003356	55.0267	-4.94436	2.75457	-1.79497	0.0726588	NA			ort005231	25.7948	8.1481	4.45657	1.82833	0.0674993	NA			ort008112	5951.25	2.36937	1.28257	1.84736	0.0646947	0.913034			ort010296	259.925	-3.21721	1.72347	-1.8667
ort004991	11.8168	-8.56806	4.00516	-2.13926	0.0324148	NA			ort008784	22.1999	-7.99514	4.43055	-1.80455	0.0711455	0.99619			ort010468	55.0267	-4.94436	2.75457	-1.79497	0.0726588	NA			ort007280	7769.19	2.39088	1.30785	1.8281	0.0675352	0.999868			ort009272	3920.48	-2.39148	1.29499	-1.84672	0.0647875	0.913034			ort009834	106.29	-4.05426	2.17626	-1.86294
ort006774	11.8168	-8.56806	4.00516	-2.13926	0.0324148	NA			ort003168	111	-3.50483	1.94282	-1.80399	0.0712325	0.99619			ort010773	159.551	3.29721	1.83729	1.7946	0.072717	NA			ort008928	36.9105	6.20302	3.39321	1.82807	0.0675388	NA			ort007685	802.925	2.63899	1.42949	1.8461	0.0648772	0.913034			ort005647	116.502	-3.93878	2.11482	-1.86246
ort008875	11.8168	-8.56806	4.00516	-2.13926	0.0324148	NA			ort011233	698.892	-2.20073	1.22004	-1.80383	0.0712584	0.99619			ort008328	33.8975	6.27103	3.49932	1.79207	0.0731212	NA			ort004167	367.725	-2.93644	1.60837	-1.82572	0.0678921	0.999868			ort011402	134.294	3.77011	2.04603	1.84265	0.0653801	0.918134			ort003769	4506.16	2.4631	1.32262	1.86229
ort009277	11.8168	-8.56806	4.00516	-2.13926	0.0324148	NA			ort004504	56.8076	-4.52486	2.50962	-1.803	0.0713878	0.99619			ort004376	3775.83	1.97205	1.10047	1.792	0.0731323	0.999594			ort006680	313.664	-3.02145	1.65503	-1.82561	0.0679083	0.999868			ort003168	84.936	-4.36715	2.37204	-1.84109	0.0656077	NA			ort009085	4302.55	2.46476	1.3238	1.86189
ort010081	11.8168	-8.56806	4.00516	-2.13926	0.0324148	NA			ort001634	843.222	-2.13829	1.1866	-1.80204	0.071539	0.99619			ort011467	1819.65	2.06068	1.14994	1.792	0.0731335	0.999594			ort008774	898.864	2.60966	1.43046	1.82435	0.0680986	0.999868			ort010085	2373.44	2.42329	1.31625	1.84106	0.0656131	0.919428			ort006074	40.1952	-6.17521	3.32083	-1.85954
ort010964	3527.57	-4.49845	2.10541	-2.13662	0.0326289	0.107544			ort011559	2495.45	1.93448	1.07365	1.80178	0.0715794	0.99619			ort004395	421.374	-2.54236	1.41879	-1.79192	0.0731463	0.999594			ort000034	37.0829	-6.17618	3.38612	-1.82397	0.0681567	NA			ort009141	906.546	-2.59091	1.40811	-1.84	0.0657684	0.919631			ort011475	496.458	-2.85336	1.53468	-1.85925
ort007942	57.653	-5.20348	2.43608	-2.13601	0.0326788	NA			ort001981	224.299	2.80872	1.55889	1.80174	0.071587	0.99619			ort003072	349.031	-2.65268	1.4807	-1.79151	0.0732111	0.999594			ort005365	141.607	-3.62433	1.98916	-1.82204	0.0684489	NA			ort002457	786.037	-2.62843	1.42932	-1.83894	0.0659243	0.919842			ort002990	3116.25	2.47414	1.33271	1.85647
ort010251	1404.54	-4.51385	2.11359	-2.13563	0.0327093	NA			ort003840	630.789	-2.23247	1.23918	-1.80157	0.0716136	0.99619			ort009142	11580.2	1.91192	1.06753	1.79098	0.0732972	0.999594			ort004227	70.7403	4.51428	2.47818	1.82161	0.0685143	NA			ort010742	137.747	3.72566	2.02754	1.83753	0.0661314	0.920156			ort009258	36.6631	6.31196	3.40117	1.85582
ort004860	38.0814	7.13086	3.34124	2.1342	0.0328267	NA			ort005440	748.817	2.1739	1.20673	1.80147	0.0716283	0.99619			ort011586	429.171	-2.5266	1.41191	-1.78948	0.0735371	0.999594			ort001227	1324.7	-2.52362	1.3854	-1.82158	0.0685187	0.999868			ort005231	26.9872	8.16955	4.44706	1.83707	0.0662	NA			ort009435	1418.82	-2.5599	1.3805	-1.85433
ort002875	392.4	-4.58068	2.14859	-2.13194	0.0330115	NA			ort005849	1307.57	-2.02924	1.12704	-1.8005	0.0717813	0.99619			ort008994	2696.74	1.99964	1.1178	1.78891	0.0736299	0.999594			ort000776	91.4314	4.12908	2.26748	1.821	0.0686068	NA			ort010714	26.9872	8.16955	4.44706	1.83707	0.0662	NA			ort001873	559.983	2.79241	1.50607	1.8541
ort004950	88.1335	5.87443	2.75661	2.13103	0.0330864	NA			ort004530	34.1098	5.98935	3.32672	1.80038	0.0718011	0.99619			ort002438	88.2831	3.99808	2.23943	1.78531	0.074211	NA			ort009588	3346.07	2.41163	1.3257	1.81914	0.0688908	0.999868			ort006320	613.414	2.70591	1.47311	1.83687	0.0662287	0.920156			ort008277	25.2354	8.2337	4.4431	1.85314
ort001303	37.7429	7.11798	3.34263	2.12946	0.0332166	NA			ort007400	69.9164	4.16158	2.31167	1.80025	0.071821	0.99619			ort011098	548.729	-2.39421	1.34131	-1.78498	0.0742638	0.999594			ort004831	36.4047	6.18284	3.39932	1.81885	0.068935	NA			ort007677	91.4353	4.24336	2.31096	1.83618	0.0663304	NA			ort011648	25.2354	8.2337	4.4431	1.85314
ort006966	48.4519	-5.31812	2.49741	-2.12946	0.0332166	NA			ort003024	3334.95	-1.90126	1.0569	-1.7989	0.0720338	0.99619			ort004499	72.1257	4.30793	2.41528	1.78361	0.0744866	NA			ort010245	1732.04	-2.47516	1.36127	-1.81827	0.0690224	0.999868			ort002679	169.646	-3.50432	1.90899	-1.83569	0.0664031	0.920621			ort003543	9071.04	2.41556	1.3035	1.85313
ort007614	1556.57	-4.49317	2.1103	-2.12916	0.0332411	0.109072			ort003197	875.048	-2.11492	1.178	-1.79534	0.0725994	0.99619			ort009354	454.531	-12.0636	6.76661	-1.78281	0.0746167	0.999594			ort003543	5964.52	2.37612	1.30739	1.81746	0.0691472	0.999868			ort002932	68.7889	4.70055	2.56338	1.83373	0.0666939	NA			ort007462	89.5896	4.22182	2.2806	1.85119
ort005647	142.448	-4.75776	2.23461	-2.12912	0.0332443	NA			ort007379	103.183	-3.56469	1.9873	-1.79373	0.0728555	0.99619			ort010065	560.789	2.37643	1.33338	1.78225	0.074708	0.999594			ort003321	136.653	-3.64487	2.0055	-1.81744	0.0691505	NA			ort003494	62.3912	4.88818	2.66584	1.83364	0.0667081	NA			ort005662	103.026	4.03479	2.17985	1.85095
ort003831	65.377	-5.09232	2.39314	-2.12788	0.0333468	NA			ort000874	956.616	2.08606	1.16372	1.79258	0.0730406	0.99619			ort002003	4351.68	1.94113	1.08954	1.7816	0.0748142	0.999594			ort010834	598.901	-2.70974	1.49107	-1.81732	0.0691684	0.999868			ort001379	5522.9	2.33794	1.27696	1.83086	0.0671212	0.928605			ort004014	1882.43	2.50694	1.356	1.84877
ort000179	30.0497	-5.86243	2.75519	-2.12778	0.0333555	NA			ort000084	534.226	-2.27867	1.27143	-1.79221	0.0730996	0.99619			ort009668	784.858	2.24249	1.25936	1.78066	0.0749678	0.999594			ort009601	8189.48	-2.36181	1.30053	-1.81604	0.069364	0.999868			ort006613	67.1599	-4.72101	2.5799	-1.82992	0.0672621	NA			ort003612	226.008	-3.25751	1.76498	-1.84564
ort004057	30.0497	-5.86243	2.75519	-2.12778	0.0333555	NA			ort011427	697.612	-2.17105	1.21398	-1.78837	0.0737171	0.99619			ort005526	23.6557	8.21317	4.61311	1.7804	0.0750108	NA			ort000220	3099.63	2.40839	1.32674	1.81527	0.0694827	0.999868			ort006671	78.3313	-4.44658	2.43247	-1.82801	0.0675479	NA			ort008704	36.1145	6.28993	3.40893	1.84513
ort007556	66788.1	-4.46025	2.09722	-2.12674	0.0334416	0.109243			ort008495	116.462	3.40552	1.90525	1.78744	0.0738662	0.99619			ort001507	5606.8	1.92046	1.07928	1.77939	0.0751764	0.999594			ort006240	117.663	3.79471	2.09128	1.81454	0.0695945	NA			ort004282	61.9006	4.8764	2.66866	1.82729	0.0676568	NA			ort001181	452.237	-2.85667	1.54831	-1.84502
ort005653	43.8513	-5.39849	2.53859	-2.12657	0.0334559	NA			ort011517	480.006	2.31455	1.29543	1.78671	0.0739848	0.99619			ort003710	324.338	-2.65546	1.49744	-1.77334	0.0761731	0.999594			ort004953	1824.9	2.45944	1.35544	1.8145	0.0696008	0.999868			ort009435	1660.22	-2.43838	1.33485	-1.82671	0.0677435	0.929955			ort001497	376.462	-2.94229	1.59476	-1.84498
ort003321	34.6503	-5.64903	2.65927	-2.12428	0.0336467	NA			ort007266	60.4519	-4.34351	2.43196	-1.78601	0.0740979	0.99619			ort004733	123.333	-3.5328	1.99274	-1.77284	0.0762553	NA			ort005754	1285.27	2.50703	1.38321	1.81248	0.0699127	0.999868			ort005565	827.478	-2.58435	1.41509	-1.82628	0.0678082	0.929955			ort007684	4077.51	2.42816	1.31687	1.84389
ort005061	34.6503	-5.64903	2.65927	-2.12428	0.0336467	NA			ort004643	159.212	-3.06185	1.71519	-1.78513	0.0742399	0.99619			ort001554	8745.41	1.88553	1.06424	1.77172	0.0764411	0.999594			ort008819	436.201	-2.81967	1.55583	-1.81233	0.0699356	0.999868			ort000225	28819.5	2.28666	1.25278	1.82526	0.0679612	0.929955			ort007183	961.247	-2.60735	1.41536	-1.84218
ort005379	176.467	-4.68558	2.20661	-2.12343	0.0337178	NA			ort002603	31.6586	-6.04288	3.39075	-1.78217	0.0747221	0.99619			ort003508	168.82	-3.18419	1.79731	-1.77164	0.0764541	NA			ort005770	392.394	2.86184	1.5811	1.81003	0.0702907	0.999868			ort009577	60.5552	-4.89974	2.68513	-1.82477	0.0680355	NA			ort011517	586.298	2.74502	1.49065	1.84149
ort008436	1158.89	-4.4834	2.1126	-2.12222	0.0338191	NA			ort011600	40.787	5.23195	2.93585	1.78209	0.0747345	0.99619			ort006041	2594.89	1.9682	1.1118	1.77028	0.0766799	0.999594			ort001586	267.063	-3.07533	1.69909	-1.80999	0.0702975	0.999868			ort000974	26.4965	8.14308	4.46375	1.82427	0.0681111	NA			ort002401	1390.59	2.53134	1.37532	1.84055
ort003431	2138.36	-4.46576	2.10469	-2.12181	0.0338536	0.109747			ort007171	142.447	3.16693	1.77773	1.78145	0.0748397	0.99619			ort001378	1945.62	2.00613	1.13358	1.76973	0.0767727	0.999594			ort009001	35.8989	6.16238	3.40586	1.80934	0.0703976	NA			ort003710	447.233	-2.80636	1.53845	-1.82415	0.0681293	0.929955			ort009036	2853.51	-2.44292	1.32841	-1.83898
ort002899	1664.24	-4.46831	2.10699	-2.12071	0.0339466	0.109747			ort003001	202.681	2.83967	1.59431	1.78113	0.0748915	0.99619			ort000874	1104.45	2.11891	1.19746	1.76951	0.0768083	0.999594			ort005227	112.617	3.82671	2.11516	1.80919	0.0704222	NA			ort008002	818.854	-2.58074	1.41543	-1.82328	0.0682603	0.929955			ort005885	559.61	-12.4364	6.76659	-1.83791
ort003882	4302.6	-4.44482	2.09886	-2.11773	0.0341976	0.109747			ort006779	85.747	3.78111	2.12328	1.78079	0.0749468	0.99619			ort010464	40.1005	5.50054	3.10956	1.76891	0.0769085	NA			ort002124	109.398	-3.85293	2.13293	-1.8064	0.0708557	NA			ort003189	119.941	-3.83564	2.1041	-1.82293	0.0683138	NA			ort008231	26.4311	-8.03284	4.37067	-1.8379
ort001560	746.735	-4.48976	2.1205	-2.11732	0.0342329	NA			ort006367	1027.75	-2.04435	1.14847	-1.78006	0.0750664	0.99619			ort002987	300.51	2.69096	1.52143	1.7687	0.0769445	0.999594			ort009304	1062.53	2.52603	1.39923	1.80531	0.0710269	0.999868			ort001518	147.617	3.60519	1.97809	1.82256	0.0683697	0.929955			ort007938	1990.86	-2.47569	1.34717	-1.8377
ort007620	358.889	-4.54673	2.14847	-2.11627	0.0343221	NA			ort009737	44.7616	-4.93286	2.77154	-1.77983	0.0751045	0.99619			ort001384	6436.74	1.89024	1.06962	1.76721	0.0771933	0.999594			ort000918	463.996	-2.77417	1.53695	-1.80498	0.071078	0.999868			ort001216	1867.2	-2.41173	1.32352	-1.82221	0.0684224	0.929955			ort006787	38.8281	-6.12459	3.33746	-1.8351
ort005997	2388.19	-4.44835	2.10207	-2.11617	0.03433	0.109747			ort006190	842.13	2.09612	1.17791	1.77953	0.0751534	0.99619			ort000604	82.6571	4.0305	2.28137	1.76671	0.0772776	NA			ort007602	173.632	3.36899	1.87042	1.8012	0.0716721	0.999868			ort006458	230.447	-3.20315	1.75799	-1.82205	0.0684467	0.929955			ort005012	122.156	-3.79123	2.06663	-1.8345
ort000721	3055.92	-4.44413	2.10023	-2.11603	0.0343425	0.109747			ort003724	33.1638	5.94813	3.34294	1.77931	0.0751893	0.99619			ort000597	890.36	-2.17354	1.23042	-1.76651	0.0773111	0.999594			ort009155	611.35	-2.66119	1.47766	-1.80094	0.0717121	0.999868			ort001263	94.8889	4.13945	2.27186	1.82205	0.0684473	NA			ort000050	68.8207	-4.5903	2.50598	-1.83173
ort004666	51.5753	-5.21294	2.46612	-2.11382	0.0345303	NA			ort003842	883.478	-2.08142	1.16995	-1.77907	0.0752289	0.99619			ort000776	100.402	3.75297	2.1252	1.76594	0.0774062	NA			ort011431	1043.36	2.51663	1.39828	1.7998	0.0718917	0.999868			ort000988	2709.57	2.36803	1.2999	1.8217	0.0685005	0.929955			ort009304	1356.13	2.51539	1.37323	1.83173
ort004992	51.5753	-5.21294	2.46612	-2.11382	0.0345303	NA			ort001158	458.778	-2.31832	1.3032	-1.77895	0.0752483	0.99619			ort003645	89.8703	3.9025	2.21098	1.76506	0.0775544	NA			ort011081	80.1662	-4.23358	2.35372	-1.79867	0.0720702	NA			ort000389	54.5216	5.11558	2.8107	1.82004	0.0687535	NA			ort007319	1107.1	2.55158	1.39321	1.83144
ort008704	36.3889	7.06527	3.34851	2.10997	0.0348607	NA			ort004517	178.588	2.93797	1.65336	1.77697	0.0755725	0.99619			ort008503	1426.63	2.05121	1.16237	1.76468	0.0776177	0.999594			ort005948	2846.95	2.37295	1.32059	1.79688	0.072355	0.999868			ort009576	713.027	-2.61429	1.43661	-1.81976	0.0687953	0.93202			ort007783	672.105	2.67227	1.46039	1.82983
ort001657	691.528	-4.47341	2.12034	-2.10976	0.0348787	NA			ort007873	38.4744	-5.31001	2.98852	-1.7768	0.0756009	0.99619			ort003179	315.384	-2.65266	1.50321	-1.76466	0.0776212	0.999594			ort005497	50.9459	-5.02566	2.79888	-1.7956	0.0725585	NA			ort008782	38.2916	6.2124	3.41538	1.81895	0.0689195	NA			ort011451	354.672	-2.92979	1.60249	-1.82828
ort005614	886.443	-4.4575	2.11381	-2.10875	0.034966	NA			ort000528	22.2298	7.83677	4.41095	1.77666	0.0756237	0.99619			ort004976	148.299	3.27731	1.86043	1.76159	0.0781391	NA			ort006920	74.2232	-4.3193	2.41171	-1.79097	0.0732984	NA			ort009621	89.4726	4.21038	2.31564	1.81823	0.0690285	NA			ort008444	464.292	2.79902	1.53187	1.82719
ort008615	213.364	4.80164	2.2772	2.10857	0.0349817	NA			ort006979	22.2298	7.83677	4.41095	1.77666	0.0756237	0.99619			ort001486	36.9741	-5.97909	3.39468	-1.76131	0.078186	NA			ort004168	50.0378	5.03314	2.81055	1.7908	0.0733253	NA			ort005770	630.285	2.65004	1.45827	1.81725	0.0691788	0.935275			ort005429	96.6276	-4.05426	2.219	-1.82707
ort000594	1062.79	-4.44846	2.11	-2.10828	0.0350072	NA			ort008693	404.393	12.0215	6.76662	1.77659	0.075635	0.99619			ort008178	36.9741	-5.97909	3.39468	-1.76131	0.078186	NA			ort005364	126.227	3.63698	2.03185	1.78999	0.0734559	NA			ort003998	73.2238	4.52058	2.48869	1.81645	0.0693011	NA			ort008562	2072.94	2.44686	1.33927	1.82701
ort009182	30705.2	-4.41057	2.09212	-2.10818	0.0350158	0.111177			ort005938	151.128	3.09265	1.74119	1.77617	0.0757056	0.99619			ort002201	45.3504	-5.25922	2.98708	-1.76066	0.078296	NA			ort005711	2238.42	-2.37806	1.32896	-1.78942	0.0735477	0.999868			ort003093	2240.14	-2.37466	1.30797	-1.81553	0.0694428	0.93572			ort003325	5500.04	2.37467	1.3003	1.82624
ort006873	147.448	5.0123	2.37758	2.10815	0.0350181	NA			ort008645	1800.3	1.92749	1.08634	1.7743	0.0760129	0.99619			ort005497	45.3504	-5.25922	2.98708	-1.76066	0.078296	NA			ort004215	476.503	2.72044	1.5212	1.78836	0.0737187	0.999868			ort009057	122.979	-3.7806	2.08299	-1.81499	0.0695256	NA			ort001808	414.303	2.84609	1.55854	1.82613
ort007931	342.148	4.6286	2.20043	2.1035	0.0354222	NA			ort004934	173.679	-2.95287	1.66428	-1.77427	0.0760193	0.99619			ort011167	2312.83	1.96236	1.11517	1.7597	0.0784582	0.999594			ort005639	611.029	2.62927	1.47042	1.78811	0.0737586	0.999868			ort006182	664.397	-2.62391	1.44651	-1.81396	0.0696843	0.93572			ort007295	197.197	-3.30633	1.81092	-1.82577
ort007285	5130.9	-4.40435	2.09392	-2.1034	0.035431	0.111177			ort009017	1140.07	2.00997	1.13289	1.7742	0.0760301	0.99619			ort009304	1083.67	2.10014	1.19473	1.75784	0.0787751	0.999594			ort002099	24.2775	8.06063	4.50877	1.78777	0.0738133	NA			ort008774	799.169	2.56312	1.41414	1.8125	0.0699092	0.93572			ort002485	2666.57	2.41675	1.32451	1.82464
ort003725	679.542	-4.45564	2.11879	-2.10291	0.0354734	NA			ort006496	189.688	2.87693	1.62205	1.77363	0.0761236	0.99619			ort011079	809.354	-2.18412	1.24298	-1.75716	0.0788899	0.999594			ort005121	24.2775	8.06063	4.50877	1.78777	0.0738133	NA			ort007859	118.412	-3.81583	2.10579	-1.81207	0.069976	NA			ort001557	35.0173	6.24484	3.42483	1.8234
ort000751	35.8812	7.045	3.35086	2.10244	0.0355145	NA			ort001781	1080.58	-2.01555	1.13819	-1.77085	0.0765861	0.99619			ort008885	757.595	2.19726	1.25307	1.7535	0.0795161	0.999594			ort005565	758.257	-2.56282	1.43388	-1.78734	0.0738833	0.999868			ort006173	5295.59	-2.29964	1.26937	-1.81163	0.0700427	0.93572			ort002018	35.0173	6.24484	3.42483	1.8234
ort011373	1936.15	-4.41269	2.0997	-2.10158	0.0355902	0.111177			ort008283	10267.5	1.79266	1.01354	1.76871	0.0769415	0.99619			ort003845	458.768	-2.40886	1.37374	-1.7535	0.0795162	0.999594			ort009036	2603.17	-2.35815	1.31961	-1.78701	0.0739356	0.999868			ort009672	141.71	3.61406	1.99512	1.81145	0.0700715	0.93572			ort008147	72.3131	4.43754	2.43452	1.82276
ort009756	2026.06	-4.40937	2.099	-2.10071	0.0356668	0.111177			ort008084	388.785	11.9648	6.76662	1.7682	0.0770273	0.99619			ort005393	1292.6	2.04772	1.16851	1.75242	0.0797021	0.999594			ort005359	35.1057	-6.09601	3.41176	-1.78677	0.0739751	NA			ort010071	141.71	3.61406	1.99512	1.81145	0.0700715	0.93572			ort009922	584.281	2.69997	1.48158	1.82236
ort005985	3861.5	-4.39966	2.09439	-2.10069	0.0356682	0.111177			ort009208	252.771	-2.63736	1.49194	-1.76775	0.0771033	0.99619			ort009809	25.1313	-7.88734	4.50264	-1.75171	0.0798231	NA			ort007341	1207.32	-2.45588	1.37486	-1.78627	0.0740551	0.999868			ort000908	26.0059	8.11611	4.48141	1.81106	0.0701311	NA			ort010354	24.1382	8.16957	4.48402	1.82193
ort008165	41383.1	-4.38873	2.08952	-2.10036	0.0356975	0.111177			ort004851	386.893	11.9577	6.76663	1.76716	0.0772013	0.99619			ort005382	794.099	2.17636	1.24291	1.75103	0.079941	0.999594			ort004890	56.0957	4.77461	2.6734	1.78597	0.0741041	NA			ort010979	83.5656	4.28552	2.36671	1.81075	0.0701797	NA			ort001322	253.731	-3.11028	1.70736	-1.82169
ort004671	1229.13	-4.42045	2.10504	-2.09993	0.0357346	NA			ort008294	90.1357	-3.65673	2.07024	-1.76633	0.0773404	0.99619			ort005760	1590.98	2.00333	1.14418	1.75089	0.0799652	0.999594			ort002496	77.7983	4.22298	2.36556	1.78519	0.0742303	NA			ort001429	113.846	-3.85474	2.13037	-1.80942	0.070385	NA			ort000385	146.866	-3.55434	1.95197	-1.8209
ort009504	82.8867	5.78433	2.75654	2.0984	0.0358697	NA			ort008672	1052.65	-2.01266	1.13969	-1.76597	0.0774009	0.99619			ort000385	120.3	-3.49373	1.99561	-1.7507	0.0799968	NA			ort000629	42.4626	5.39068	3.02394	1.78267	0.0746406	NA			ort003588	156.996	3.5015	1.93572	1.80889	0.0704677	0.93909			ort007266	37.9167	-6.08982	3.34888	-1.81847
ort002568	195.377	-4.59061	2.18797	-2.09811	0.0358951	NA			ort008207	370.89	2.39645	1.35766	1.76514	0.0775408	0.99619			ort001181	431.91	-2.43245	1.38979	-1.75023	0.0800788	0.999594			ort009085	2273.46	2.35971	1.324	1.78226	0.074707	0.999868			ort005501	107.212	3.92472	2.1718	1.80713	0.0707417	NA			ort000188	54.0522	-4.99283	2.7504	-1.81531
ort011575	23.9721	-6.12546	2.92108	-2.09698	0.0359951	NA			ort007348	57.5079	4.3757	2.479	1.76511	0.0775459	0.99619			ort007223	4485.47	1.87966	1.0742	1.74983	0.0801479	0.999594			ort000079	1498.13	-2.41022	1.35262	-1.78189	0.0747677	0.999868			ort000041	1455.49	-2.41635	1.33733	-1.80684	0.0707865	0.940272			ort005908	54.0522	-4.99283	2.7504	-1.81531
ort010517	101.043	-4.77756	2.27858	-2.09673	0.0360176	NA			ort001011	332.691	2.4565	1.39193	1.76482	0.0775942	0.99619			ort003400	51.9936	-4.85983	2.7775	-1.74971	0.0801676	NA			ort003313	1865.4	2.37767	1.33535	1.78055	0.0749856	0.999868			ort005781	45.3079	-5.49718	3.04314	-1.80642	0.070853	NA			ort000357	880.56	-2.56524	1.41317	-1.81524
ort011642	1240.32	-4.411	2.10391	-2.09658	0.0360311	NA			ort008774	595.938	2.17847	1.23542	1.76335	0.0778414	0.99619			ort004235	2318.75	1.94219	1.11031	1.74924	0.0802501	0.999594			ort001804	142.124	-3.48763	1.95898	-1.78033	0.0750224	NA			ort001873	537.02	2.68317	1.48579	1.80588	0.0709365	0.940272			ort006548	1047.99	-2.52359	1.39112	-1.81408
ort005833	2327.34	-4.39236	2.09619	-2.09541	0.036135	0.111714			ort004759	298.702	-2.51562	1.42704	-1.76282	0.0779305	0.99619			ort009036	2863.46	-1.9171	1.09618	-1.74889	0.0803109	0.999594			ort000007	691.792	-2.57118	1.44441	-1.78009	0.0750612	0.999868			ort008828	555.514	-2.66709	1.47774	-1.80485	0.0710984	0.940272			ort006843	25.5197	-7.98222	4.40105	-1.81371
ort007328	3572.3	-4.38502	2.09312	-2.09497	0.036174	0.111714			ort005754	920.92	2.03891	1.1571	1.76209	0.0780549	0.99619			ort009085	3038.3	1.90963	1.09226	1.74833	0.0804076	0.999594			ort010713	72.2462	4.31326	2.42353	1.77975	0.0751176	NA			ort010635	65.1219	-4.67484	2.59017	-1.80484	0.0710993	NA			ort008520	5254.72	2.34805	1.29508	1.81305
ort005859	33.1732	-5.5849	2.66712	-2.09398	0.0362616	NA			ort005364	106.418	3.4387	1.9517	1.7619	0.0780857	0.99619			ort003352	479.131	2.37226	1.3573	1.74777	0.0805035	0.999594			ort000041	990.513	-2.47812	1.39291	-1.7791	0.0752235	0.999868			ort007233	141.227	-3.59485	1.99201	-1.80463	0.0711324	0.940272			ort000667	46.2123	-5.36165	2.95817	-1.81249
ort006100	28.5726	-5.78843	2.76633	-2.09246	0.0363975	NA			ort010598	21.7568	7.80574	4.43246	1.76104	0.0782311	0.99619			ort001503	4133.13	1.87988	1.07623	1.74673	0.080684	0.999594			ort004966	4983.56	2.29469	1.29061	1.77799	0.0754048	0.999868			ort011516	1035.77	2.47451	1.37261	1.80278	0.0714234	0.941916			ort000624	34.4687	6.22176	3.43327	1.81219
ort000257	1087.65	-4.39799	2.10421	-2.0901	0.0366091	NA			ort010929	21.7568	7.80574	4.43246	1.76104	0.0782311	0.99619			ort004934	167.664	-3.11875	1.78588	-1.74634	0.0807523	NA			ort002690	373.76	-2.79616	1.5744	-1.77601	0.0757308	0.999868			ort007183	853.142	-2.52083	1.3989	-1.802	0.0715452	0.941916			ort006891	136.655	-3.59815	1.98606	-1.8117
ort007501	80.9942	-4.85341	2.32252	-2.08972	0.0366431	NA			ort004462	3247.38	1.83779	1.04376	1.76075	0.0782814	0.99619			ort006058	1268.52	-2.04018	1.16839	-1.74614	0.080787	0.999594			ort011327	159.976	-3.36402	1.89431	-1.77585	0.0757574	0.999868			ort010707	59.9379	4.82831	2.68038	1.80135	0.0716472	NA			ort005830	613.924	-2.6586	1.46767	-1.81144
ort009904	35.0349	7.01057	3.35497	2.08961	0.0366532	NA			ort009225	46.0453	4.80927	2.73451	1.75873	0.0786233	0.99619			ort003330	22.5018	8.14102	4.66418	1.74543	0.0809097	NA			ort008985	112.099	3.71966	2.09463	1.77581	0.0757643	NA			ort006956	720.519	-2.56717	1.42557	-1.8008	0.0717342	0.942504			ort001183	37.461	-6.07212	3.35493	-1.80991
ort000066	331.793	-4.48136	2.14472	-2.08949	0.036664	NA			ort002932	32.2179	5.90569	3.35999	1.75765	0.0788066	0.99619			ort008601	22.5018	8.14102	4.66418	1.74543	0.0809097	NA			ort008147	49.0263	5.00276	2.81764	1.77551	0.0758134	NA			ort001523	71.7518	4.48999	2.49476	1.79977	0.0718967	NA			ort011361	264.584	-3.04871	1.68533	-1.80898
ort003451	65.5462	-4.96679	2.37729	-2.08926	0.0366842	NA			ort008515	3347.17	1.82485	1.04005	1.75457	0.0793328	0.99619			ort010757	2401.69	-1.93064	1.10621	-1.74528	0.0809365	0.999594			ort000504	4018.34	2.30023	1.2956	1.77541	0.0758295	0.999868			ort010332	147.636	3.53587	1.96463	1.79976	0.0718983	0.942763			ort002554	94.3491	-4.01773	2.2229	-1.80743
ort005286	2633.9	-4.37182	2.09321	-2.08858	0.0367457	0.112655			ort003265	28093.5	1.75022	0.998095	1.75356	0.0795065	0.99619			ort009679	36.1075	-5.94432	3.40769	-1.74438	0.0810924	NA			ort002701	77.6947	-4.18596	2.35943	-1.77414	0.0760407	NA			ort005465	135.313	3.61811	2.01376	1.79669	0.0723844	0.945299			ort001608	285.648	-2.9959	1.65792	-1.80702
ort005942	4614.07	4.37105	2.09327	2.08814	0.0367852	0.112655			ort001503	2437.97	1.85296	1.0567	1.75353	0.0795112	0.99619			ort004077	115.39	-3.52348	2.02036	-1.74398	0.0811623	NA			ort000624	41.9568	5.37297	3.02882	1.77395	0.0760717	NA			ort001728	154.543	3.47676	1.93652	1.79536	0.0725962	0.945299			ort000220	4187.07	2.3462	1.29848	1.80688
ort002764	45.4977	-5.22501	2.50374	-2.08688	0.0368988	NA			ort010011	39.3681	5.17948	2.95393	1.75342	0.0795305	0.99619			ort007001	31.5896	6.16794	3.54133	1.7417	0.081561	NA			ort008004	415.935	-2.74105	1.54526	-1.77384	0.0760889	0.999868			ort009283	71.2611	4.47965	2.49684	1.79413	0.0727923	NA			ort002985	23.5897	8.1364	4.50491	1.80612
ort001742	852.47	-4.39851	2.10809	-2.08649	0.0369341	NA			ort010876	324.013	-11.862	6.76672	-1.753	0.0796026	0.99619			ort005085	93.8731	-3.78562	2.17407	-1.74126	0.0816384	NA			ort001103	863.011	-2.49549	1.40736	-1.77317	0.0761999	0.999868			ort005348	401.567	-2.78012	1.55107	-1.79238	0.0730719	0.945299			ort003452	23.5897	8.1364	4.50491	1.80612
ort007803	91.8416	-4.78445	2.29363	-2.08597	0.0369814	NA			ort003407	924.982	2.02067	1.15279	1.75286	0.0796267	0.99619			ort008541	1047.02	-2.07539	1.19229	-1.74067	0.0817409	0.999594			ort007966	81835.7	-2.23919	1.26286	-1.77311	0.0762102	0.999868			ort000034	24.9655	-8.1115	4.52704	-1.79179	0.0731666	NA			ort003160	60.4298	4.6736	2.58907	1.80513
ort000827	679.465	4.45942	2.13791	2.08588	0.0369896	NA			ort007295	338.874	-2.41695	1.37952	-1.75203	0.0797689	0.99619			ort008672	1446.4	-2.00136	1.15002	-1.74028	0.081809	0.999594			ort011167	2678.35	2.32214	1.3102	1.77235	0.0763357	0.999868			ort009737	24.9655	-8.1115	4.52704	-1.79179	0.0731666	NA			ort011452	379.298	-2.83471	1.57122	-1.80414
ort010900	525.57	-4.42636	2.12209	-2.08585	0.0369924	NA			ort004891	918.722	2.01889	1.15303	1.75094	0.0799571	0.99619			ort008654	24.698	-7.86225	4.51951	-1.73963	0.0819247	NA			ort009999	115.628	3.67362	2.07276	1.77234	0.0763387	NA			ort004910	403.765	2.77532	1.54928	1.79136	0.073236	0.945299			ort009930	109.33	3.80679	2.11006	1.80411
ort005646	34.6964	6.99656	3.35668	2.08437	0.0371267	NA			ort011024	45.5723	4.79384	2.73924	1.75006	0.0801075	0.99619			ort007375	2714.1	1.9037	1.09487	1.73874	0.0820803	0.999594			ort002633	511.206	-2.64877	1.4959	-1.77069	0.076613	0.999868			ort002326	791.394	2.51706	1.40533	1.79108	0.07328	0.945299			ort006816	371.365	-2.83911	1.57572	-1.80179
ort007798	60.9457	-4.98798	2.39607	-2.08174	0.0373666	NA			ort010035	212.947	2.72277	1.55658	1.74921	0.0802556	0.99619			ort003613	106.436	-3.60603	2.07487	-1.73796	0.082218	NA			ort011475	474.985	-2.67683	1.51187	-1.77055	0.076636	0.999868			ort010355	36.8196	6.15507	3.43698	1.79084	0.0733196	NA			ort004353	357.322	-2.85693	1.5861	-1.80123
ort011267	34.5272	6.9895	3.35755	2.08173	0.0373675	NA			ort006351	737.076	2.07818	1.18817	1.74906	0.0802801	0.99619			ort009896	1352.12	-2.01039	1.15678	-1.73792	0.082225	0.999594			ort007871	123.192	3.59902	2.0329	1.77038	0.0766632	NA			ort009082	58.0077	-4.83561	2.70119	-1.79018	0.0734257	NA			ort001416	353.342	2.85771	1.58734	1.80031
ort009961	211.163	-4.52308	2.17469	-2.07987	0.0375375	NA			ort008373	353.785	11.8287	6.76664	1.74808	0.0804496	0.99619			ort004910	284.209	2.6526	1.5266	1.73759	0.0822838	0.999594			ort000789	1754.3	-2.35841	1.33338	-1.76875	0.076936	0.999868			ort011524	36.1557	-6.18349	3.4542	-1.79014	0.073432	NA			ort000981	127.518	3.6235	2.01297	1.80008
ort001040	956.852	-4.37458	2.10356	-2.07961	0.0375612	NA			ort005948	1584.18	1.90102	1.08749	1.74808	0.08045	0.99619			ort010147	529.487	2.30217	1.32536	1.73701	0.0823847	0.999594			ort006127	831.767	-2.49341	1.4099	-1.7685	0.076977	0.999868			ort001926	467.369	-2.70042	1.50961	-1.78882	0.073644	0.945299			ort001853	326.748	2.89442	1.60921	1.79866
ort001116	40.8971	-5.2954	2.54725	-2.07887	0.0376291	NA			ort005615	1091.85	-1.97163	1.12791	-1.74803	0.0804587	0.99619			ort006223	3733.69	-1.87008	1.07667	-1.73692	0.0824018	0.999594			ort000040	307.79	-2.87502	1.62622	-1.76791	0.0770752	0.999868			ort003001	186.116	3.28449	1.83655	1.7884	0.0737115	0.945299			ort011544	2798.94	2.35544	1.30971	1.79844
ort001484	919.94	4.40891	2.12133	2.07837	0.0376753	NA			ort007063	164.705	2.93653	1.68016	1.74776	0.0805051	0.99619			ort004959	7769.56	1.82497	1.05128	1.73595	0.0825724	0.999594			ort005534	55.4059	-4.72166	2.67137	-1.7675	0.0771438	NA			ort002687	2123.78	-2.32282	1.29897	-1.7882	0.0737435	0.945299			ort005969	335.347	-2.88237	1.60284	-1.79829
ort007546	1667.21	-4.35146	2.09433	-2.07774	0.0377337	0.11508			ort009155	456.386	-2.2564	1.29114	-1.74759	0.0805344	0.99619			ort003358	496.013	2.32911	1.34186	1.73573	0.0826113	0.999594			ort007575	80.8215	4.10164	2.32063	1.76747	0.0771501	NA			ort010154	278.511	-2.97613	1.66526	-1.78719	0.0739075	0.945299			ort003185	45.3009	-5.33221	2.96641	-1.79753
ort005571	1817.94	-4.34419	2.09279	-2.07579	0.037913	0.115149			ort003135	445.563	2.26709	1.29768	1.74704	0.0806311	0.99619			ort000978	3146.81	1.88184	1.08453	1.73518	0.0827095	0.999594			ort009943	89.9025	3.95743	2.23927	1.76729	0.0771804	NA			ort002861	2946.07	-2.28705	1.27991	-1.78688	0.0739571	0.945299			ort001518	130.717	3.58956	1.99705	1.79743
ort008085	79.3325	5.71992	2.75658	2.07501	0.0379859	NA			ort004798	9067.68	1.76022	1.00767	1.74683	0.0806675	0.99619			ort011590	2037.1	-1.92986	1.11352	-1.73312	0.0830735	0.999594			ort008280	23.7257	-7.99428	4.52484	-1.76675	0.0772697	NA			ort001634	1139.49	-2.41818	1.35337	-1.78679	0.0739722	0.945299			ort005294	925.255	-2.50912	1.39719	-1.79583
ort002697	1295.45	-4.34903	2.09666	-2.07426	0.0380547	NA			ort003984	21.2839	7.77403	4.45443	1.74524	0.0809437	0.99619			ort005770	220.582	2.82387	1.63183	1.7305	0.0835418	0.999594			ort004056	48.9687	-4.96677	2.8125	-1.76596	0.0774022	NA			ort006779	81.1123	4.2403	2.37425	1.78595	0.0741066	NA			ort000424	461.918	-2.71929	1.51656	-1.79307
ort005301	180.267	-4.53642	2.18812	-2.0732	0.0381532	NA			ort006345	21.2839	7.77403	4.45443	1.74524	0.0809437	0.99619			ort001216	1312.84	-2.00031	1.15655	-1.72956	0.0837096	0.999594			ort003513	6490.81	-2.25486	1.27762	-1.7649	0.0775813	0.999868			ort000649	64.8635	4.61242	2.58271	1.78589	0.0741179	NA			ort001981	199.535	3.19892	1.78412	1.793
ort006185	1508.13	-4.34098	2.09414	-2.07291	0.0381804	NA			ort009498	88.0214	-3.61973	2.0751	-1.74436	0.0810961	0.99619			ort007722	1540.97	-1.967	1.13785	-1.7287	0.083862	0.999594			ort007785	1269.35	2.39604	1.35802	1.76436	0.0776708	0.999868			ort003990	86.0378	4.15079	2.32468	1.78553	0.0741754	NA			ort001896	3680.61	-2.32376	1.2962	-1.79275
ort008187	385.553	4.50646	2.17476	2.07216	0.0382504	NA			ort011104	315.915	2.44006	1.39971	1.74326	0.0812883	0.99619			ort000170	1860.8	1.93352	1.11885	1.72813	0.0839649	0.999594			ort006458	238.843	-3.01456	1.71058	-1.7623	0.0780181	0.999868			ort006127	774.584	-2.50816	1.40554	-1.78448	0.0743451	0.945299			ort011468	2578.88	2.34997	1.31087	1.79268
ort001308	720.193	-4.36452	2.10763	-2.07082	0.0383755	NA			ort001391	852.006	2.02464	1.16149	1.74315	0.0813078	0.99619			ort007115	24.2648	-7.83671	4.53688	-1.72734	0.0841072	NA			ort004834	127.261	-3.53362	2.00759	-1.76013	0.0783859	NA			ort009155	588.33	-2.59764	1.45573	-1.78442	0.0743548	0.945299			ort010245	1969.22	-2.37541	1.32574	-1.79176
ort006974	819.635	-4.35243	2.10378	-2.06886	0.0385589	NA			ort001264	147.166	-3.02704	1.73662	-1.74306	0.0813229	0.99619			ort008745	24.2648	-7.83671	4.53688	-1.72734	0.0841072	NA			ort001478	2399.55	-2.30383	1.30917	-1.75977	0.0784466	0.999868			ort003257	2636.31	-2.29018	1.28404	-1.78357	0.074493	0.945299			ort003499	414.135	-2.76179	1.54178	-1.7913
ort000355	503.506	4.44128	2.14969	2.066	0.0388281	NA			ort009188	3264.71	1.80541	1.03652	1.7418	0.0815429	0.99619			ort009854	21.9248	8.10354	4.69141	1.72731	0.0841113	NA			ort007001	33.37	6.05546	3.44117	1.75971	0.0784567	NA			ort002153	1762.39	-2.33533	1.30983	-1.78293	0.074597	0.945299			ort006129	59.3326	4.64612	2.59499	1.79042
ort000533	279.71	-4.43551	2.14788	-2.06506	0.0389171	NA			ort007420	141.463	-3.06118	1.75805	-1.74123	0.0816427	0.99619			ort001183	35.2409	-5.9087	3.4212	-1.72709	0.0841522	NA			ort003181	274.903	2.91769	1.65814	1.75961	0.0784732	0.999868			ort000504	4278.69	2.24971	1.26257	1.78186	0.0747727	0.945299			ort000007	2016.73	-2.36961	1.32356	-1.79033
ort005761	341.84	-4.4056	2.13495	-2.06356	0.0390592	NA			ort008378	220.082	-2.67489	1.53676	-1.7406	0.081754	0.99619			ort001852	1705.98	1.9444	1.12622	1.72649	0.0842599	0.999594			ort002427	507.263	-2.6238	1.49122	-1.7595	0.0784921	0.999868			ort007835	1094.4	-2.41584	1.35582	-1.78183	0.0747767	0.945299			ort007370	450.246	-2.72229	1.52088	-1.78995
ort007462	33.3424	6.93913	3.36395	2.06279	0.0391326	NA			ort009354	304.456	-11.7722	6.76673	-1.73972	0.0819082	0.99619			ort007102	4168.07	1.83672	1.06577	1.72337	0.0848208	0.999594			ort007995	1087.47	2.412	1.37117	1.75909	0.0785629	0.999868			ort005627	3600.23	-2.26033	1.26873	-1.78156	0.0748202	0.945299			ort005305	40.959	5.45741	3.05083	1.78883
ort005507	70.316	-4.84169	2.34769	-2.06232	0.0391769	NA			ort010296	245.371	-2.58749	1.48956	-1.73709	0.0823718	0.99619			ort001405	3663.65	1.84609	1.07142	1.72303	0.0848838	0.999594			ort002401	1706.02	2.33779	1.32971	1.75812	0.0787279	0.999868			ort007897	745.025	2.5129	1.41061	1.78143	0.0748422	0.945299			ort003125	24.6082	-7.92975	4.43387	-1.78845
ort003541	102.858	-4.66801	2.26352	-2.06228	0.039181	NA			ort006815	3637.28	-1.78781	1.02964	-1.73634	0.0825029	0.99619			ort010333	131.707	-3.30305	1.9174	-1.72267	0.0849486	NA			ort008860	130.733	-3.4993	1.99059	-1.75792	0.0787614	NA			ort001538	58.4658	4.79115	2.68966	1.78132	0.0748601	NA			ort005914	24.6082	-7.92975	4.43387	-1.78845
ort003188	62.592	-4.89807	2.37906	-2.05882	0.039511	NA			ort006196	623.139	-2.1085	1.21457	-1.73601	0.082562	0.99619			ort003512	3408.84	1.84828	1.07405	1.72085	0.0852787	0.999594			ort008151	1622.38	-2.34344	1.33328	-1.75765	0.0788073	0.999868			ort001321	35.6462	-6.16273	3.46203	-1.78009	0.0750613	NA			ort004959	8317.85	2.27916	1.27441	1.7884
ort008001	147.894	-4.54053	2.20633	-2.05796	0.0395944	NA			ort001501	2240.99	-1.83196	1.05543	-1.73574	0.0826099	0.99619			ort002554	100.227	-3.62787	2.10833	-1.72073	0.0853003	NA			ort001130	126.767	-3.52752	2.00772	-1.75697	0.0789224	NA			ort007623	43.7794	-5.44655	3.05979	-1.78004	0.0750696	NA			ort006131	285.165	2.9432	1.64629	1.78778
ort001015	585.931	-4.339	2.10947	-2.05691	0.0396945	NA			ort002633	561.851	-2.14542	1.23625	-1.73543	0.0826651	0.99619			ort001219	2533.5	-1.87435	1.09071	-1.71847	0.0857117	0.999594			ort001242	40.9453	5.33691	3.03892	1.75619	0.0790567	NA			ort008992	1193.53	2.38687	1.34346	1.77666	0.0756247	0.953339			ort002980	92.0705	-3.98026	2.22705	-1.78723
ort007765	17.8944	-6.7104	3.26254	-2.0568	0.0397053	NA			ort001851	634.434	-2.09793	1.21004	-1.73378	0.0829575	0.99619			ort002384	11257.4	-1.78046	1.03643	-1.71788	0.0858183	0.999594			ort010399	40.9453	5.33691	3.03892	1.75619	0.0790567	NA			ort008503	1488.94	2.34357	1.32039	1.7749	0.0759137	0.955137			ort000776	114.63	3.69762	2.06922	1.78696
ort004555	2220.4	-4.28761	2.08498	-2.05643	0.0397415	0.120127			ort011535	317.918	2.41447	1.39306	1.73322	0.0830569	0.99619			ort000166	3531.49	1.83947	1.07091	1.71768	0.0858558	0.999594			ort004731	1221.94	2.38168	1.35687	1.75528	0.0792119	0.999868			ort004978	725.935	-2.50186	1.41096	-1.77316	0.0762015	0.955753			ort001523	69.0215	4.36715	2.4468	1.78484
ort001643	98.2578	-4.66606	2.26982	-2.0557	0.0398117	NA			ort006851	44.6264	4.76247	2.74896	1.73246	0.0831916	0.99619			ort003345	210.982	-2.83309	1.64941	-1.71763	0.0858633	0.999594			ort009135	3525.31	2.26259	1.28937	1.7548	0.0792929	0.999868			ort005939	3470.33	2.24434	1.26613	1.7726	0.0762944	0.955753			ort010699	555.846	-2.62897	1.47302	-1.78475
ort007743	27.0955	-5.71043	2.77871	-2.05507	0.0398727	NA			ort010954	73.3384	3.84964	2.22235	1.73224	0.0832306	0.99619			ort011354	1376.8	-1.96343	1.14451	-1.71552	0.0862501	0.999594			ort001706	23.2314	-7.9639	4.5438	-1.7527	0.079654	NA			ort005595	50.3841	-5.05424	2.85212	-1.7721	0.076378	NA			ort001502	8484.88	2.26967	1.27213	1.78415
ort009604	27.0955	-5.71043	2.77871	-2.05507	0.0398727	NA			ort011524	20.0856	-7.85075	4.53314	-1.73186	0.083299	0.99619			ort008884	2709.79	1.8596	1.08449	1.71471	0.0863976	0.999594			ort009809	23.2314	-7.9639	4.5438	-1.7527	0.079654	NA			ort007988	1531.94	2.33276	1.31649	1.77196	0.0764017	0.955753			ort009142	9273.04	2.26671	1.27068	1.78385
ort000242	35642.4	-4.26622	2.07632	-2.0547	0.0399082	0.120127			ort001909	1086.29	-1.94312	1.12218	-1.73156	0.0833514	0.99619			ort007132	10181.5	1.77723	1.03663	1.71443	0.0864506	0.999594			ort000389	47.5089	4.95597	2.82882	1.75195	0.0797819	NA			ort005429	82.8791	-4.15113	2.3433	-1.77149	0.0764798	NA			ort001045	1616.22	-2.38277	1.33576	-1.78383
ort007933	76.286	5.66234	2.75701	2.0538	0.0399951	NA			ort001024	1982.36	1.83967	1.06256	1.73136	0.0833874	0.99619			ort002130	566.479	-2.22503	1.29824	-1.71389	0.0865496	0.999594			ort010773	138.814	3.41975	1.95227	1.75168	0.0798292	NA			ort004078	24.5338	8.03205	4.53771	1.77007	0.0767163	NA			ort001284	36.0938	-6.01767	3.37387	-1.78361
ort010468	39.42	-5.24095	2.55226	-2.05345	0.0400285	NA			ort009922	380.85	2.30882	1.33449	1.73011	0.0836098	0.99619			ort004159	356.207	2.45235	1.43106	1.71366	0.0865912	0.999594			ort005939	4712.92	2.23872	1.27825	1.75139	0.0798794	0.999868			ort008489	24.5338	8.03205	4.53771	1.77007	0.0767163	NA			ort011580	64.7193	-4.49785	2.52346	-1.78241
ort010427	1692.63	-4.28486	2.0868	-2.05331	0.0400422	0.120127			ort003523	851.069	-1.99939	1.15604	-1.72951	0.0837181	0.99619			ort002990	3825.41	1.82529	1.06528	1.71343	0.0866331	0.999594			ort000649	53.5668	4.70557	2.68764	1.75082	0.0799772	NA			ort010243	35.1367	-6.14167	3.47035	-1.76975	0.0767683	NA			ort007819	1508.69	2.38812	1.34009	1.78207
ort010849	22.495	-6.03235	2.93954	-2.05214	0.0401562	NA			ort009038	1326.46	-1.89583	1.09729	-1.72773	0.0840363	0.99619			ort004950	66.356	4.1813	2.44052	1.71328	0.0866606	NA			ort011582	47.9802	-4.93639	2.81971	-1.75067	0.0800021	NA			ort005170	56.4792	-4.79572	2.7115	-1.76866	0.0769508	NA			ort006552	5817.98	2.27669	1.27796	1.78151
ort010989	22.495	-6.03235	2.93954	-2.05214	0.0401562	NA			ort001506	2917.02	1.79135	1.0369	1.7276	0.0840592	0.99619			ort003079	37.2156	5.39036	3.14919	1.71167	0.0869579	NA			ort011535	361.047	2.74176	1.56774	1.74886	0.0803147	0.999868			ort001412	192.06	3.19976	1.8101	1.76773	0.0771063	0.962723			ort009057	135.836	-3.50844	1.97049	-1.78049
ort002273	32.6654	6.90954	3.36787	2.05161	0.0402079	NA			ort011491	2363.27	1.81029	1.04859	1.7264	0.0842758	0.99619			ort011544	4674.53	1.80688	1.05595	1.71114	0.0870549	0.999594			ort009513	857.229	2.43916	1.39484	1.74871	0.0803412	0.999868			ort000517	1111.14	2.37729	1.3465	1.76553	0.0774752	0.965483			ort010713	113.533	3.68267	2.07022	1.77887
ort007555	222.626	4.59213	2.23964	2.05039	0.0403268	NA			ort005346	508.244	2.16818	1.25596	1.72631	0.0842923	0.99619			ort003500	248.814	-2.68597	1.56996	-1.71085	0.0871086	0.999594			ort002987	336.862	2.77262	1.58668	1.74743	0.0805623	0.999868			ort011673	68.8077	4.4268	2.50769	1.76529	0.077515	NA			ort002707	293.571	2.90235	1.63188	1.77853
ort001413	42515.5	-4.24895	2.07438	-2.0483	0.0405306	0.121098			ort009066	957.533	1.96203	1.13705	1.72554	0.0844298	0.99619			ort010699	574.853	-2.21069	1.29281	-1.70999	0.0872671	0.999594			ort004504	33.1286	-6.01112	3.44006	-1.74739	0.08057	NA			ort009922	476.932	2.63241	1.49251	1.76375	0.0777741	0.966188			ort002003	6347.43	2.26704	1.2747	1.77849
ort003667	617.504	-4.3109	2.1051	-2.04784	0.0405759	NA			ort002842	284.371	-11.6738	6.76675	-1.72517	0.0844977	0.99619			ort003333	1284.1	1.96589	1.14989	1.70963	0.087334	0.999594			ort007303	716.219	-2.48189	1.4204	-1.74732	0.0805812	0.999868			ort009522	4245.72	2.21116	1.25428	1.76289	0.0779188	0.966188			ort010284	2618.61	2.31599	1.30298	1.77746
ort002529	339.225	-4.36112	2.13041	-2.04708	0.0406501	NA			ort009072	341.239	-2.35449	1.36521	-1.72463	0.0845937	0.99619			ort009910	125.93	-3.30931	1.93744	-1.70809	0.08762	NA			ort010501	279.927	2.87348	1.64465	1.74717	0.0806072	0.999868			ort004422	1249.07	-2.34764	1.33195	-1.76255	0.0779757	0.966188			ort000229	95.8091	-3.89495	2.19131	-1.77746
ort002092	10.3397	-8.37541	4.09194	-2.04681	0.0406771	NA			ort003005	315.474	11.6633	6.76667	1.72364	0.0847725	0.99619			ort003393	231.116	2.72679	1.59753	1.70688	0.0878439	0.999594			ort010318	64.1652	4.36705	2.501	1.74612	0.0807901	NA			ort007465	23.9465	-8.05138	4.56822	-1.76248	0.0779889	NA			ort009684	226.473	-3.06733	1.7259	-1.77724
ort002391	10.3397	-8.37541	4.09194	-2.04681	0.0406771	NA			ort001366	459.362	2.20379	1.27941	1.7225	0.0849781	0.99619			ort010990	2116.5	-1.87461	1.09863	-1.70632	0.0879482	0.999594			ort000174	1603.13	-2.31625	1.32744	-1.7449	0.0810024	0.999868			ort005497	42.7604	-5.41178	3.07125	-1.76208	0.0780563	NA			ort005641	448.56	2.69085	1.51417	1.77711
ort003155	10.3397	-8.37541	4.09194	-2.04681	0.0406771	NA			ort000385	146.582	-2.97354	1.72767	-1.72113	0.0852272	0.99619			ort001909	839.808	-2.06346	1.21113	-1.70375	0.0884273	0.999594			ort009033	22.7601	7.96752	4.56683	1.74465	0.0810458	NA			ort007965	50.5962	5.00455	2.84207	1.76088	0.0782588	NA			ort002377	3506.65	-2.2918	1.29024	-1.77627
ort003903	10.3397	-8.37541	4.09194	-2.04681	0.0406771	NA			ort007689	343.652	2.34376	1.36197	1.72086	0.0852766	0.99619			ort004245	310.615	2.51087	1.47417	1.70324	0.0885228	0.999594			ort006726	255.729	-2.92022	1.67442	-1.74402	0.0811559	0.999868			ort001416	299.177	2.86203	1.62616	1.76	0.078408	0.96874			ort002534	627.343	-2.56815	1.44605	-1.77597
ort004544	10.3397	-8.37541	4.09194	-2.04681	0.0406771	NA			ort010133	3561.59	1.76359	1.02491	1.72073	0.0853004	0.99619			ort009798	93.4781	3.64194	2.13829	1.7032	0.0885299	NA			ort008657	59.3717	-4.49034	2.57583	-1.74326	0.0812885	NA			ort009297	651.981	-2.50513	1.42371	-1.75958	0.0784784	0.96874			ort006496	213.79	3.10001	1.74563	1.77586
ort005995	10.3397	-8.37541	4.09194	-2.04681	0.0406771	NA			ort007375	1862.09	1.82844	1.06311	1.7199	0.0854501	0.99619			ort004178	547.095	2.21311	1.30013	1.70222	0.0887147	0.999594			ort004149	942.545	-2.40482	1.37952	-1.74323	0.0812936	0.999868			ort010954	68.317	4.41599	2.50995	1.75939	0.0785111	NA			ort006989	24.1525	-7.90278	4.45107	-1.77548
ort008255	10.3397	-8.37541	4.09194	-2.04681	0.0406771	NA			ort000670	35.8316	-5.20465	3.02716	-1.71932	0.0855563	0.99619			ort006613	90.1599	3.68614	2.16576	1.70201	0.0887534	NA			ort008953	69.7747	-4.22552	2.42456	-1.7428	0.0813689	NA			ort005991	5566.54	-2.18592	1.24382	-1.75742	0.0788466	0.970327			ort009737	24.1525	-7.90278	4.45107	-1.77548
ort009632	10.3397	-8.37541	4.09194	-2.04681	0.0406771	NA			ort004660	35.8316	-5.20465	3.02716	-1.71932	0.0855563	0.99619			ort004253	106.147	-3.49373	2.05288	-1.70187	0.0887798	NA			ort006347	1293.44	-2.34322	1.34464	-1.74264	0.0813971	0.999868			ort003842	1149.85	-2.35121	1.3384	-1.75673	0.0789634	0.970327			ort009208	322.95	-2.84319	1.60182	-1.77498
ort009804	10.3397	-8.37541	4.09194	-2.04681	0.0406771	NA			ort010479	367.473	-2.30182	1.33948	-1.71845	0.0857145	0.99619			ort011482	5716.15	1.77753	1.04485	1.70123	0.0889002	0.999594			ort003289	2110.32	2.27756	1.30722	1.74229	0.081458	0.999868			ort010348	251.299	2.96488	1.68823	1.75621	0.0790526	0.970327			ort002069	379.214	-2.75845	1.55536	-1.77351
ort010522	10.3397	-8.37541	4.09194	-2.04681	0.0406771	NA			ort008247	1735.59	1.83465	1.06805	1.71776	0.0858411	0.99619			ort011081	76.1101	-3.95315	2.32411	-1.70093	0.0889556	NA			ort004670	800.283	2.4396	1.40053	1.7419	0.0815253	0.999868			ort006783	73.2426	4.28807	2.44219	1.75583	0.079118	NA			ort010333	211.063	-3.10738	1.75224	-1.77338
ort010646	10.3397	-8.37541	4.09194	-2.04681	0.0406771	NA			ort010121	3909.72	1.75013	1.01956	1.71656	0.0860599	0.99619			ort011427	564.166	-2.19769	1.29249	-1.70036	0.0890635	0.999594			ort001471	2151.61	2.27355	1.3056	1.74138	0.0816161	0.999868			ort008151	1431.13	-2.3081	1.315	-1.75521	0.0792234	0.970598			ort007871	77.0647	4.15298	2.34344	1.77217
ort006346	521.185	-4.31813	2.11037	-2.04615	0.0407413	NA			ort003356	64.0407	-3.99318	2.32649	-1.7164	0.0860895	0.99619			ort001191	1052.64	-1.99449	1.17299	-1.70034	0.0890666	0.999594			ort001178	294.927	-2.82755	1.62406	-1.74104	0.0816771	0.999868			ort004987	62.4101	4.55448	2.59601	1.75441	0.07936	NA			ort011645	184.893	-3.20365	1.80859	-1.77135
ort008862	650.385	-4.29714	2.10237	-2.04395	0.0409588	NA			ort001544	323.128	-2.3659	1.37902	-1.71563	0.0862289	0.99619			ort008558	71.2001	-4.0556	2.38551	-1.7001	0.0891127	NA			ort009659	220.014	-3.0112	1.72958	-1.741	0.0816827	0.999868			ort005282	147.183	3.39986	1.93922	1.75321	0.0795659	0.972968			ort009538	272.888	-2.92149	1.65232	-1.76811
ort009453	816.897	-4.28176	2.096	-2.04283	0.0410692	NA			ort003494	43.6804	4.73041	2.75907	1.71449	0.0864385	0.99619			ort007219	9722.7	1.75265	1.03125	1.69955	0.0892157	0.999594			ort000579	163.47	-3.23661	1.86042	-1.73972	0.0819086	0.999868			ort003185	42.2509	-5.39408	3.07731	-1.75285	0.0796272	NA			ort008934	8748.69	2.23478	1.26415	1.76782
ort008846	1448.59	-4.25835	2.08542	-2.04196	0.0411551	NA			ort007931	714.902	2.01676	1.17858	1.71118	0.0870485	0.99619			ort005728	1646.08	-1.89967	1.11796	-1.69923	0.0892758	0.999594			ort006956	869.609	-2.41171	1.38721	-1.73854	0.082116	0.999868			ort010724	43291.8	2.13448	1.21851	1.75171	0.0798239	0.973244			ort001973	112.586	-3.66465	2.07465	-1.76639
ort007115	34.8195	-5.32711	2.60936	-2.04153	0.0411977	NA			ort007102	4405.05	1.73328	1.01308	1.71089	0.0871017	0.99619			ort007670	2061.23	1.86256	1.09691	1.69801	0.0895066	0.999594			ort010121	3340.68	2.22931	1.28267	1.73802	0.082208	0.999868			ort008964	125.47	-3.5589	2.03185	-1.75156	0.0798502	NA			ort000343	492.839	-2.6292	1.48855	-1.76629
ort008107	74.4242	5.62598	2.75737	2.04034	0.041316	NA			ort002201	41.0617	-4.80413	2.81337	-1.70761	0.0877096	0.99619			ort002791	614.703	-2.15819	1.27111	-1.69788	0.0895313	0.999594			ort004660	32.6343	-5.9891	3.44761	-1.73718	0.0823562	NA			ort000789	3067.66	-2.20857	1.26164	-1.75055	0.0800229	0.973244			ort008760	32.2743	6.12554	3.46951	1.76553
ort008899	611.934	-4.27994	2.10194	-2.03618	0.0417318	NA			ort009713	1129.38	-1.8913	1.10798	-1.70698	0.0878254	0.99619			ort005465	105.02	3.4749	2.04746	1.69718	0.0896628	NA			ort004934	87.6149	-3.8824	2.236	-1.73631	0.0825086	NA			ort004625	606.39	-2.50591	1.43266	-1.74913	0.0802693	0.973244			ort003961	489.1	-2.6299	1.48973	-1.76536
ort000963	243.075	-4.37572	2.14926	-2.03592	0.0417587	NA			ort002836	1825.08	-1.80842	1.05975	-1.70645	0.0879241	0.99619			ort010598	52.3628	4.53412	2.67307	1.69622	0.0898442	NA			ort010707	52.5552	4.677	2.69371	1.73626	0.0825172	NA			ort002137	353.862	-2.73811	1.56581	-1.74868	0.0803458	0.973244			ort005301	175.593	-3.22109	1.82749	-1.76258
ort001636	187.807	4.61052	2.26573	2.03489	0.0418615	NA			ort005457	813.985	-1.95946	1.15201	-1.7009	0.088962	0.99619			ort011044	52.3628	4.53412	2.67307	1.69622	0.0898442	NA			ort000874	1172.46	2.34101	1.3497	1.73447	0.0828342	0.999868			ort004331	2066.32	2.2413	1.28242	1.74771	0.0805144	0.973244			ort003427	93.9863	-3.86535	2.1944	-1.76146
ort003834	745.904	-4.2642	2.09583	-2.03461	0.0418898	NA			ort006660	1008.56	1.901	1.11939	1.69825	0.0894604	0.99619			ort007462	79.6285	3.83938	2.26358	1.69616	0.0898559	NA			ort001075	1271.16	-2.32555	1.34133	-1.73376	0.0829614	0.999868			ort005514	432.307	-2.63728	1.50903	-1.74766	0.0805221	0.973244			ort011666	136.84	-3.44331	1.95486	-1.76141
ort007525	890.721	-4.25446	2.09149	-2.03417	0.0419344	NA			ort003226	2276.46	1.76521	1.04028	1.69685	0.0897253	0.99619			ort003325	4951.29	1.77493	1.04707	1.69513	0.0900507	0.999594			ort002188	13025.4	-2.16929	1.25127	-1.73368	0.0829751	0.999868			ort008572	1165.64	2.32785	1.33246	1.74703	0.0806317	0.973244			ort007375	3120.07	2.26519	1.28706	1.75997
ort009075	2119.11	-4.22866	2.0789	-2.03409	0.0419428	0.12481			ort001385	77.0326	-3.65215	2.15232	-1.69684	0.0897261	0.99619			ort011451	334.871	-2.44594	1.44399	-1.69387	0.0902896	0.999594			ort008737	52.9345	-4.65328	2.6856	-1.73268	0.0831526	NA			ort005606	82.1124	4.07953	2.33604	1.74634	0.0807514	NA			ort007752	712.649	2.49221	1.41615	1.75985
ort009368	162.204	-4.44742	2.18724	-2.03334	0.0420178	NA			ort009714	95.9574	3.37104	1.98724	1.69635	0.0898198	0.99619			ort007871	115.984	3.34386	1.97522	1.69291	0.0904731	NA			ort002518	365.553	2.69383	1.55492	1.73246	0.0831916	0.999868			ort003612	198.424	-3.10905	1.78175	-1.74495	0.0809939	0.975472			ort002675	74.0193	-4.19175	2.38204	-1.75973
ort003870	48764.9	-4.20585	2.06964	-2.03216	0.0421373	0.124883			ort007947	78.1794	3.63762	2.14518	1.69572	0.0899391	0.99619			ort000769	608.418	2.14452	1.26888	1.69008	0.091012	0.999594			ort008615	617.915	2.48913	1.43703	1.73214	0.0832491	0.999868			ort009397	88.9555	-3.95239	2.26721	-1.74328	0.0812842	NA			ort002108	128.452	-3.50122	1.98985	-1.75954
ort006143	100.273	5.04187	2.48285	2.03067	0.0422882	NA			ort002130	480.534	-2.12946	1.25616	-1.69521	0.090036	0.99619			ort007603	20.7709	8.02553	4.74945	1.68978	0.09107	NA			ort003407	1342.16	2.30881	1.33438	1.73025	0.0835854	0.999868			ort008700	10262.1	2.13557	1.22546	1.74267	0.0813915	0.975472			ort005731	250.343	2.94857	1.67601	1.75928
ort001020	493.92	-4.2785	2.10761	-2.03002	0.0423542	NA			ort007871	115.21	3.15502	1.8614	1.69497	0.0900816	0.99619			ort001071	919.074	-2.00899	1.18902	-1.68961	0.0911019	0.999594			ort006013	1344.68	2.30826	1.33415	1.73014	0.0836056	0.999868			ort007504	34.3662	6.05414	3.47637	1.74151	0.0815935	NA			ort007290	608.929	-2.53844	1.44304	-1.7591
ort004935	271.786	4.45942	2.19818	2.02868	0.0424904	NA			ort001856	728.757	1.97882	1.16821	1.69388	0.0902872	0.99619			ort001332	22.9649	-7.75728	4.59212	-1.68926	0.0911699	NA			ort007063	229.015	2.95271	1.70682	1.72995	0.0836394	0.999868			ort005220	81.6218	4.07037	2.33755	1.7413	0.081631	NA			ort009165	43.0224	-5.25585	2.98911	-1.75834
ort010652	249.491	-4.34788	2.14463	-2.02734	0.0426281	NA			ort009036	1754.64	-1.79254	1.05827	-1.69383	0.0902976	0.99619			ort004978	663.216	-2.11158	1.25018	-1.68902	0.0912149	0.999594			ort007604	185.173	3.10532	1.79527	1.72972	0.0836806	0.999868			ort001808	784.278	2.40835	1.3832	1.74115	0.0816579	0.975472			ort001856	1263.22	2.36354	1.34433	1.75815
ort001541	37.943	-5.18437	2.55765	-2.02701	0.0426617	NA			ort008166	981.987	1.89812	1.12103	1.69319	0.0904189	0.99619			ort007733	246.555	2.63291	1.55919	1.68864	0.0912885	0.999594			ort010084	97.9606	3.71766	2.15008	1.72908	0.0837949	NA			ort001473	5392.8	2.153	1.23714	1.7403	0.0818062	0.975472			ort005227	144.423	3.36717	1.91752	1.756
ort001960	1079.94	-4.22443	2.08526	-2.02585	0.0427803	NA			ort004932	1907.83	1.77997	1.05138	1.69298	0.0904594	0.99619			ort010418	3003.29	1.80167	1.06705	1.68846	0.0913232	0.999594			ort000542	52.0494	4.6625	2.69684	1.72888	0.0838313	NA			ort000357	837.556	-2.38672	1.37213	-1.73943	0.0819591	0.975472			ort006196	512.266	-2.58996	1.47507	-1.75581
ort001421	6736.14	-4.19311	2.07015	-2.02551	0.042815	0.126347			ort001633	440.276	2.1635	1.27799	1.69289	0.0904759	0.99619			ort007173	152.053	3.04172	1.80192	1.68805	0.0914022	NA			ort005273	549.899	2.51144	1.45541	1.72559	0.0844215	0.999868			ort009392	179.265	3.17835	1.82749	1.73919	0.0820011	0.975472			ort010058	21.9439	8.03206	4.57479	1.75572
ort003074	31.1421	6.84064	3.37742	2.02541	0.0428256	NA			ort004395	444.479	-2.15822	1.27497	-1.69276	0.0905012	0.99619			ort004909	3627.9	1.78414	1.05696	1.688	0.0914122	0.999594			ort003499	319.262	-2.74369	1.59014	-1.72544	0.0844481	0.999868			ort010242	54.4412	-4.74075	2.7261	-1.73902	0.0820307	NA			ort003168	83.7749	-3.99703	2.27698	-1.75541
ort008852	96.9499	-4.57921	2.26181	-2.02457	0.0429111	NA			ort003424	625.588	-2.0242	1.19614	-1.69228	0.0905929	0.99619			ort001911	267.62	2.57039	1.52378	1.68685	0.0916326	0.999594			ort004126	6234.69	2.16945	1.25765	1.725	0.0845266	0.999868			ort005384	2673.83	-2.19636	1.26316	-1.73878	0.0820727	0.975472			ort009750	31.7257	6.10045	3.47925	1.75338
ort011086	48.7904	-4.95556	2.44833	-2.02406	0.0429642	NA			ort010085	1537.61	1.80863	1.06917	1.69163	0.0907165	0.99619			ort000571	19767.5	-1.7139	1.01635	-1.68633	0.091733	0.999594			ort011594	630.985	2.46286	1.42874	1.72379	0.0847454	0.999868			ort000268	60.0269	-4.55251	2.61883	-1.73838	0.0821443	NA			ort005465	117.188	3.56775	2.03491	1.75327
ort003187	466.147	-4.26685	2.10813	-2.02399	0.0429709	NA			ort007496	655.411	-2.00745	1.18671	-1.69161	0.0907196	0.99619			ort003523	950.983	-1.99261	1.18186	-1.68599	0.0917974	0.999594			ort000762	616.88	2.46837	1.43244	1.72319	0.0848539	0.999868			ort002469	282.928	2.84122	1.63457	1.73821	0.0821736	0.975472			ort006825	528.147	2.57043	1.46646	1.75282
ort002788	48489.8	-4.18405	2.06727	-2.02395	0.0429753	0.126347			ort011455	986.884	1.89331	1.11956	1.69112	0.0908132	0.99619			ort002450	486.193	-2.23071	1.32353	-1.68542	0.0919067	0.999594			ort001915	81.672	-3.92099	2.27791	-1.72131	0.0851947	NA			ort011663	33.6082	-6.07657	3.49661	-1.73785	0.082238	NA			ort003396	793.233	-2.44758	1.39683	-1.75223
ort007289	230.92	-4.34466	2.14901	-2.0217	0.0432073	NA			ort008517	1011.23	-1.88711	1.116	-1.69096	0.0908448	0.99619			ort010345	3806.97	1.77474	1.05337	1.68482	0.0920243	0.999594			ort004896	3280.97	2.19324	1.27439	1.72101	0.0852497	0.999868			ort005942	1561.5	2.25779	1.29928	1.73772	0.0822593	0.975472			ort010757	1529.71	-2.32093	1.32491	-1.75177
ort010673	2223.42	-4.18851	2.07419	-2.01935	0.0434506	0.127236			ort000912	27.9586	-5.86067	3.4692	-1.68934	0.0911538	0.99619			ort009150	151.476	3.03557	1.80208	1.68448	0.0920889	NA			ort009208	355.495	-2.67773	1.55612	-1.72077	0.0852926	0.999868			ort000309	49.1241	4.96061	2.85483	1.73762	0.0822776	NA			ort009405	51.1965	4.75946	2.71735	1.75151
ort008727	86.1025	-4.61091	2.28387	-2.0189	0.0434973	NA			ort005094	579.239	-2.04409	1.21056	-1.68854	0.0913068	0.99619			ort008681	41.0175	-5.11036	3.03541	-1.68358	0.0922621	NA			ort001416	264.776	2.83113	1.64701	1.71895	0.0856229	0.999868			ort001268	2131.22	2.21569	1.2756	1.73698	0.0823908	0.975472			ort008838	142.95	-3.36865	1.92437	-1.75052
ort006937	220.072	-4.3445	2.15213	-2.0187	0.0435183	NA			ort003120	386.78	-2.21403	1.31141	-1.68828	0.0913575	0.99619			ort004311	654.696	-2.10514	1.2504	-1.68356	0.0922662	0.999594			ort003879	967.477	-2.34268	1.363	-1.71877	0.0856563	0.999868			ort003072	365.977	-2.69121	1.54971	-1.73659	0.0824595	0.975472			ort008151	1487.95	-2.32209	1.32654	-1.75048
ort005553	764.183	-4.21958	2.09047	-2.01848	0.0435408	NA			ort009435	1305.7	-1.83004	1.08407	-1.68811	0.0913897	0.99619			ort010479	166.362	-2.95185	1.75337	-1.68353	0.0922722	NA			ort003523	1157.59	-2.30588	1.34231	-1.71785	0.085824	0.999868			ort010286	378.741	2.66902	1.53888	1.7344	0.0828479	0.9769			ort008371	61.4341	4.42412	2.52741	1.75046
ort006077	115.691	-4.49633	2.22852	-2.01762	0.0436303	NA			ort008475	2189.19	-1.7548	1.03958	-1.688	0.091412	0.99619			ort011558	1555.37	1.87734	1.11598	1.68223	0.0925242	0.999594			ort004178	750.832	2.39971	1.39699	1.71777	0.0858379	0.999868			ort009014	3892.36	2.15855	1.24468	1.73422	0.0828794	0.9769			ort003588	140.127	3.37693	1.93002	1.74968
ort010299	446.268	-4.246	2.10727	-2.01493	0.0439116	NA			ort001080	42.2615	4.68094	2.77501	1.68682	0.0916384	0.99619			ort001210	3647.43	-1.77171	1.05392	-1.68107	0.0927497	0.999594			ort008782	31.3469	5.96383	3.4727	1.71735	0.0859158	NA			ort003965	3020.67	-2.17196	1.2541	-1.73188	0.0832945	0.978482			ort005760	2182.86	2.27334	1.29948	1.74943
ort006025	97.5654	5.00115	2.48221	2.0148	0.0439255	NA			ort004168	42.2615	4.68094	2.77501	1.68682	0.0916384	0.99619			ort001024	3094.34	1.7852	1.06212	1.68079	0.0928036	0.999594			ort003840	943.165	-2.34316	1.36499	-1.71661	0.0860504	0.999868			ort010084	154.109	3.29315	1.9016	1.73178	0.0833133	0.978482			ort006914	23.2411	-7.84728	4.48717	-1.74883
ort006184	224.842	-4.32812	2.1489	-2.01411	0.0439979	NA			ort003181	435.491	2.15586	1.27825	1.68657	0.0916867	0.99619			ort009183	598.896	2.13032	1.26786	1.68024	0.09291	0.999594			ort001518	84.339	3.85913	2.24836	1.71642	0.0860848	NA			ort009590	2071.07	2.20134	1.27365	1.72837	0.0839215	0.983856			ort008784	23.2411	-7.84728	4.48717	-1.74883
ort009356	55.0373	-4.83598	2.40163	-2.01362	0.0440493	NA			ort006639	883.165	1.91084	1.13353	1.68575	0.0918435	0.99619			ort003499	368.08	-2.36012	1.40464	-1.68023	0.0929123	0.999594			ort007050	21.7486	7.90193	4.60934	1.71433	0.0864679	NA			ort003920	23.0618	7.94278	4.59993	1.72672	0.0842185	NA			ort010990	3413.07	-2.23182	1.27763	-1.74684
ort004736	125.107	4.76725	2.36788	2.0133	0.0440831	NA			ort000142	218.066	2.55483	1.5159	1.68535	0.0919203	0.99619			ort010110	7591.34	1.72773	1.02836	1.68009	0.0929401	0.999594			ort005621	463.697	-2.54638	1.4854	-1.71428	0.0864779	0.999868			ort008811	23.0618	7.94278	4.59993	1.72672	0.0842185	NA			ort004714	49.4952	-4.86159	2.78348	-1.74659
ort006853	33.3424	-5.26298	2.61716	-2.01095	0.0443307	NA			ort003852	558.597	-2.04785	1.21639	-1.68354	0.0922707	0.99619			ort010355	51.2088	4.50057	2.6822	1.67794	0.0933587	NA			ort005849	2008.44	-2.21928	1.29514	-1.71355	0.0866121	0.999868			ort006814	767.15	-2.37965	1.37927	-1.7253	0.0844728	0.985408			ort001026	210.793	-3.02653	1.73616	-1.74323
ort010679	30.2959	6.8009	3.38321	2.01019	0.0444114	NA			ort011069	1002.83	-1.87584	1.11428	-1.68346	0.0922863	0.99619			ort011202	968.019	-1.97089	1.1751	-1.67721	0.0935014	0.999594			ort008506	108.938	-3.54467	2.06953	-1.71279	0.0867504	NA			ort008187	898.019	2.33825	1.35542	1.72511	0.0845083	0.985408			ort003107	729.638	2.44787	1.40424	1.7432
ort010758	429.343	-4.23402	2.10726	-2.00925	0.0445107	NA			ort005449	502.429	2.08802	1.24072	1.6829	0.092394	0.99619			ort008501	5119.85	1.74162	1.03842	1.67719	0.0935045	0.999594			ort008215	45.5087	-4.85754	2.83904	-1.71098	0.0870849	NA			ort010121	4306.8	2.13115	1.2365	1.72353	0.0847928	0.985408			ort009992	5940.37	2.19468	1.25955	1.74243
ort008902	1507.73	-4.16942	2.07531	-2.00906	0.044531	NA			ort002152	4091.33	1.69038	1.00535	1.68139	0.0926867	0.99619			ort003181	287.965	2.4972	1.48929	1.67677	0.0935881	0.999594			ort009272	4622.59	-2.15061	1.2575	-1.71022	0.0872245	0.999868			ort006825	514.618	2.50819	1.45527	1.72352	0.0847945	0.985408			ort009878	472.309	2.58566	1.4845	1.74177
ort000378	343.533	-4.25518	2.11821	-2.00885	0.0445527	NA			ort002679	138.181	-2.9246	1.74044	-1.68038	0.0928835	0.99619			ort007715	22.5316	-7.72979	4.61182	-1.67608	0.0937221	NA			ort009225	38.4164	5.24258	3.06599	1.70991	0.0872822	NA			ort006552	5884.24	2.11503	1.22744	1.72312	0.0848668	0.985408			ort004159	259.204	2.88061	1.65412	1.74147
ort005900	44.1898	-4.98346	2.48085	-2.00877	0.0445617	NA			ort000870	122.471	3.04756	1.81436	1.67969	0.0930186	0.99619			ort010633	22.5316	-7.72979	4.61182	-1.67608	0.0937221	NA			ort007804	1605.9	-2.23589	1.30832	-1.70899	0.0874536	0.999868			ort001852	2060.79	2.19017	1.27143	1.72261	0.0849594	0.985408			ort004772	2037.74	2.26295	1.29969	1.74115
ort007036	460.578	-4.22642	2.10408	-2.00868	0.0445714	NA			ort004822	1748.91	-1.7686	1.05316	-1.67932	0.0930895	0.99619			ort002157	512.615	-2.18677	1.30486	-1.67586	0.0937655	0.999594			ort009958	21.7485	-7.86874	4.60502	-1.70873	0.087501	NA			ort005876	804.042	-2.35453	1.3692	-1.71964	0.0854982	0.987772			ort001911	321.802	2.75702	1.58354	1.74104
ort000897	2035.43	-4.16017	2.07172	-2.00808	0.0446347	0.130185			ort002866	153.826	2.82456	1.68211	1.67918	0.0931172	0.99619			ort010943	828.827	-2.00819	1.19964	-1.674	0.0941311	0.999594			ort004422	1406.35	-2.2536	1.31897	-1.70861	0.0875233	0.999868			ort003523	1397.34	-2.23478	1.30059	-1.71829	0.0857435	0.987772			ort000597	1094	-2.35003	1.35063	-1.73994
ort007677	30.1266	6.79281	3.38442	2.00708	0.0447409	NA			ort003710	256.388	-2.42688	1.44564	-1.67876	0.0931985	0.99619			ort007635	154.651	2.98602	1.78399	1.67379	0.0941727	NA			ort006603	560.497	-2.46432	1.4424	-1.70849	0.0875463	0.999868			ort004058	419.787	2.58072	1.50234	1.7178	0.0858327	0.987772			ort000798	405.941	-2.64489	1.52028	-1.73974
ort005364	70.0237	5.53621	2.75854	2.00693	0.0447569	NA			ort005728	929.188	-1.8831	1.12263	-1.67739	0.0934654	0.99619			ort006345	28.7048	6.02776	3.60161	1.67363	0.0942033	NA			ort005791	256.764	-2.81925	1.65121	-1.70738	0.0877509	0.999868			ort007575	151.656	3.26762	1.9024	1.71763	0.0858641	0.987772			ort001089	21.3953	7.99553	4.6008	1.73785
ort004340	234.089	4.43561	2.21074	2.00639	0.0448145	NA			ort002222	41.7885	4.66407	2.78054	1.67739	0.0934655	0.99619			ort011524	47.2273	-4.71609	2.81848	-1.67328	0.0942731	NA			ort003787	848.4	-2.34412	1.37351	-1.70666	0.0878852	0.999868			ort009965	377.307	2.62988	1.53138	1.71733	0.0859195	0.987772			ort010315	21.3953	7.99553	4.6008	1.73785
ort006583	348.303	-4.24635	2.11665	-2.00616	0.0448389	NA			ort011180	595.542	-2.01312	1.20022	-1.67729	0.0934866	0.99619			ort000912	32.6411	-5.79622	3.46523	-1.67268	0.0943905	NA			ort006342	30.8411	5.93999	3.48126	1.70627	0.0879569	NA			ort001418	64.8823	4.33799	2.52656	1.71695	0.0859874	NA			ort005562	4791.41	-2.19446	1.26274	-1.73785
ort000861	3536.16	-4.146	2.06703	-2.00578	0.04488	0.130383			ort011674	140.239	-2.90139	1.73023	-1.67688	0.0935654	0.99619			ort002332	20.1939	7.98489	4.78071	1.67023	0.0948736	NA			ort005301	188.794	-3.01865	1.77123	-1.70427	0.0883316	0.999868			ort007684	3562.82	2.12518	1.23947	1.71458	0.0864215	0.991797			ort009837	61.0736	-4.41039	2.54086	-1.73578
ort010373	376.414	-4.237	2.11245	-2.00573	0.0448851	NA			ort009866	415.71	2.15759	1.28675	1.67678	0.0935859	0.99619			ort009255	2040.62	1.81011	1.08488	1.66849	0.0952194	0.999594			ort005224	120.64	3.40903	2.00032	1.70424	0.0883354	NA			ort007339	914.775	-2.30924	1.34753	-1.71369	0.0865855	0.991935			ort006385	2098.59	2.24769	1.29525	1.73534
ort001596	29.9574	6.78469	3.38564	2.00396	0.0450746	NA			ort001711	28.907	5.74649	3.42712	1.67677	0.0935879	0.99619			ort004380	105.857	-3.38774	2.03235	-1.66691	0.095533	NA			ort010296	165.976	-3.11296	1.82889	-1.70211	0.0887351	0.999868			ort005467	47.6521	4.91528	2.86858	1.71349	0.0866229	NA			ort001378	1777.02	2.26388	1.30538	1.73427
ort007873	21.0179	-5.93281	2.96093	-2.0037	0.0451021	NA			ort003125	27.43	-5.83266	3.48163	-1.67526	0.0938823	0.99619			ort011480	305.568	2.4359	1.46151	1.6667	0.0955733	0.999594			ort004055	96.0523	-3.6513	2.14531	-1.70199	0.088758	NA			ort003387	1884.32	-2.18061	1.27322	-1.71268	0.0867721	0.992333			ort011582	86.1463	-3.87801	2.2391	-1.73195
ort005382	177.99	4.52981	2.26096	2.00349	0.0451252	NA			ort007865	2487.29	1.71964	1.02674	1.67485	0.0939633	0.99619			ort003961	653.971	-2.07016	1.24252	-1.6661	0.0956937	0.999594			ort007834	396.728	2.58	1.51593	1.70192	0.0887703	0.999868			ort005620	22.5711	7.91175	4.62228	1.71165	0.0869606	NA			ort000720	329.111	2.72292	1.57219	1.73193
ort002450	248.522	-4.27749	2.13708	-2.00156	0.0453317	NA			ort004987	51.8322	4.21816	2.51935	1.6743	0.0940711	0.99619			ort000425	1041.36	-1.93093	1.15902	-1.66601	0.0957116	0.999594			ort002299	2726.91	-2.16322	1.27199	-1.70066	0.0890068	0.999868			ort010464	40.7638	5.28549	3.08801	1.71162	0.0869672	NA			ort000911	500.966	-2.5397	1.46725	-1.73093
ort006458	264.139	-4.2681	2.13254	-2.00141	0.045348	NA			ort007933	249.731	11.3262	6.76673	1.6738	0.0941691	0.99619			ort004878	758.364	-2.01982	1.21239	-1.66597	0.0957185	0.999594			ort010085	1458.27	2.2279	1.31103	1.69935	0.0892541	0.999868			ort008277	32.8942	5.99001	3.50261	1.71016	0.0872367	NA			ort005047	147.237	-3.28324	1.897	-1.73075
ort005617	501.521	-4.19902	2.09844	-2.00102	0.0453898	NA			ort011536	64.7693	3.83966	2.29499	1.67306	0.094315	0.99619			ort004010	1266.37	1.8841	1.13165	1.66491	0.0959311	0.999594			ort000558	21.2428	7.86798	4.63187	1.69866	0.089383	NA			ort007119	661.342	-2.38952	1.39758	-1.70975	0.0873116	0.995599			ort011081	66.1793	-4.25588	2.45938	-1.73047
ort002266	1051.42	-4.15577	2.07813	-1.99976	0.0455257	NA			ort010844	18.4999	-7.7321	4.62324	-1.67244	0.0944374	0.99619			ort002069	245.778	-2.58093	1.55035	-1.66474	0.0959651	0.999594			ort001535	21.2428	7.86798	4.63187	1.69866	0.089383	NA			ort006548	1172.68	-2.2464	1.31447	-1.70898	0.087454	0.995599			ort003523	1189.39	-2.314	1.33728	-1.73038
ort007158	234.551	-4.27643	2.14047	-1.99789	0.0457285	NA			ort006018	564.078	-2.01915	1.20893	-1.67019	0.0948808	0.99619			ort006571	1322.78	-1.8755	1.12663	-1.66471	0.0959715	0.999594			ort005650	21.2428	7.86798	4.63187	1.69866	0.089383	NA			ort008819	625.412	-2.40019	1.40642	-1.7066	0.0878968	0.995599			ort006416	73.2245	4.07498	2.35543	1.73003
ort008309	16.4173	-6.58487	3.29652	-1.99752	0.0457689	NA			ort007320	762.142	1.92233	1.15112	1.66997	0.0949244	0.99619			ort000187	89.4393	3.57299	2.1472	1.66403	0.0961071	NA			ort004817	199.76	2.96082	1.74306	1.69863	0.0893884	0.999868			ort001201	158.871	-3.18871	1.86979	-1.70539	0.0881225	0.995599			ort002738	140.034	3.31826	1.91864	1.72949
ort000372	68.8389	5.51106	2.75901	1.99748	0.0457734	NA			ort008402	219.596	2.51118	1.50509	1.66846	0.0952247	0.99619			ort010121	4654.1	1.72392	1.03615	1.66378	0.096156	0.999594			ort005936	1399.33	2.22799	1.31316	1.69666	0.0897616	0.999868			ort000753	46.3081	-4.92871	2.89009	-1.70538	0.0881229	NA			ort001388	161.736	-3.19629	1.84823	-1.72938
ort002129	873.55	-4.15674	2.08113	-1.99734	0.0457878	NA			ort000111	41.3156	4.64699	2.78619	1.66787	0.0953422	0.99619			ort006814	351.474	-2.34814	1.41169	-1.66335	0.0962424	0.999594			ort005615	738.244	-2.35251	1.38762	-1.69535	0.0900085	0.999868			ort007266	46.3081	-4.92871	2.89009	-1.70538	0.0881229	NA			ort005513	30.6285	6.04892	3.4994	1.72856
ort009549	1834.6	-4.13164	2.0694	-1.99654	0.0458752	0.132749			ort007965	41.3156	4.64699	2.78619	1.66787	0.0953422	0.99619			ort008231	22.0983	-7.70178	4.63217	-1.66267	0.0963781	NA			ort004626	230.992	2.84774	1.68159	1.69348	0.0903635	0.999868			ort004153	730.135	2.34995	1.37808	1.70523	0.0881516	0.995599			ort006345	30.6285	6.04892	3.4994	1.72856
ort003086	256.384	4.37131	2.19179	1.9944	0.046108	NA			ort006127	574.315	-2.00633	1.20371	-1.66679	0.0955555	0.99619			ort002025	886.435	-1.96661	1.18286	-1.66259	0.0963936	0.999594			ort007694	230.992	2.84774	1.68159	1.69348	0.0903635	0.999868			ort001093	39.7034	-5.30216	3.10968	-1.70505	0.0881856	NA			ort002659	81.0407	-3.94611	2.28362	-1.728
ort006496	120.876	4.71575	2.36617	1.99299	0.0462629	NA			ort006571	1088.21	-1.82659	1.09682	-1.66535	0.0958427	0.99619			ort008096	784.596	2.00075	1.20364	1.66224	0.0964641	0.999594			ort001911	259.707	2.77444	1.63856	1.69322	0.0904135	0.999868			ort009019	8414.65	2.06705	1.21232	1.70504	0.0881873	0.995599			ort010345	4622.82	2.17511	1.259	1.72764
ort003907	161.234	-4.33408	2.17512	-1.99257	0.0463086	NA			ort005306	283.095	-2.33509	1.40253	-1.66492	0.0959287	0.99619			ort008004	760.384	-2.01082	1.21	-1.66183	0.0965464	0.999594			ort011451	335.689	-2.63554	1.55665	-1.69309	0.0904381	0.999868			ort003143	254.847	2.82122	1.65559	1.70406	0.0883705	0.995599			ort004153	1016.84	2.33542	1.35221	1.72711
ort001419	255.03	4.3633	2.19122	1.99127	0.0464511	NA			ort003328	250.629	-2.40824	1.44767	-1.66354	0.0962051	0.99619			ort005365	93.7271	-3.52302	2.12065	-1.6613	0.096654	NA			ort005778	85.8448	3.75198	2.21726	1.69217	0.0906132	NA			ort007681	6854.86	2.07131	1.21568	1.70382	0.0884144	0.995599			ort008207	6612.17	-2.15822	1.25014	-1.72638
ort006946	4165.63	-4.10239	2.06162	-1.98989	0.0466028	0.134326			ort003257	1684.06	-1.74764	1.05059	-1.66348	0.0962165	0.99619			ort001550	192.93	-2.7605	1.66199	-1.66096	0.0967217	NA			ort003179	219.566	-2.8774	1.70049	-1.6921	0.0906275	0.999868			ort004306	332.391	2.66225	1.56277	1.70355	0.0884656	0.995599			ort003186	199.071	3.01806	1.74821	1.72638
ort003312	103.535	-4.43669	2.23603	-1.98418	0.0472357	NA			ort007414	77.5056	-3.53668	2.12693	-1.66281	0.0963506	0.99619			ort005301	159.285	-2.93114	1.76486	-1.66084	0.0967461	NA			ort002057	598.269	-2.40375	1.42094	-1.69166	0.0907106	0.999868			ort007400	94.9453	3.73709	2.19372	1.70354	0.0884663	NA			ort008585	110.149	3.55108	2.05696	1.72638
ort003994	391.4	-4.1663	2.10315	-1.98098	0.0475936	NA			ort000860	82.5473	3.46115	2.08158	1.66276	0.0963615	0.99619			ort005971	69.5304	3.91137	2.3571	1.6594	0.097036	NA			ort001507	4811.68	2.10892	1.24688	1.69135	0.0907702	0.999868			ort005094	848.936	-2.30014	1.35226	-1.70096	0.0889503	0.995599			ort002457	873.954	-2.3648	1.37051	-1.72549
ort003003	1050.32	-4.10418	2.07248	-1.98032	0.0476677	NA			ort001227	832.263	-1.88454	1.13358	-1.66246	0.0964205	0.99619			ort004538	28.1278	5.99801	3.61497	1.65922	0.0970721	NA			ort010888	239.05	2.81977	1.66731	1.69121	0.0907973	0.999868			ort007635	224.237	2.89989	1.70513	1.70068	0.0890024	0.995599			ort002418	212.801	-2.9664	1.72138	-1.72327
ort004287	3288.67	-4.07823	2.05993	-1.97979	0.0477271	0.136627			ort003971	3831.29	1.66364	1.001	1.66197	0.096518	0.99619			ort000284	268.199	2.49968	1.50763	1.65802	0.0973137	0.999594			ort000988	2402.3	2.1494	1.27242	1.68921	0.0911783	0.999868			ort000779	989.622	2.26244	1.33085	1.7	0.0891313	0.995599			ort007179	447.529	-2.56395	1.48823	-1.72282
ort008166	2415.36	-4.08132	2.06192	-1.97938	0.0477731	0.136627			ort002879	275.862	-2.34354	1.41045	-1.66155	0.0966028	0.99619			ort009414	1412.25	1.84941	1.11565	1.6577	0.0973786	0.999594			ort006687	294.502	-2.69264	1.59419	-1.68904	0.0912127	0.999868			ort003268	117.139	3.47254	2.04494	1.69812	0.0894854	NA			ort008988	836.359	2.36701	1.37439	1.72222
ort003593	28.6034	6.71796	3.39603	1.97818	0.0479082	NA			ort011044	35.1113	5.00955	3.01566	1.66118	0.0966774	0.99619			ort011517	478.422	2.17654	1.31326	1.65736	0.0974457	0.999594			ort002675	49.9688	-4.56669	2.70423	-1.68872	0.0912727	NA			ort000627	22.0805	7.88004	4.64547	1.69628	0.0898321	NA			ort009135	5146.11	2.15554	1.25284	1.72053
ort001033	335.178	-4.17324	2.11024	-1.97761	0.0479725	NA			ort011098	395.794	-2.14856	1.29344	-1.66112	0.0966885	0.99619			ort004996	1219.62	1.87496	1.1324	1.65574	0.097775	0.999594			ort006610	49.9688	-4.56669	2.70423	-1.68872	0.0912727	NA			ort008760	22.0805	7.88004	4.64547	1.69628	0.0898321	NA			ort009530	20.8467	7.95805	4.62709	1.71988
ort004305	1060.03	-4.096	2.07146	-1.97736	0.0480015	NA			ort004060	70.7454	-3.65506	2.20145	-1.6603	0.0968549	0.99619			ort005457	614.839	-2.06977	1.25083	-1.65472	0.0979813	0.999594			ort004159	311.078	2.65947	1.57596	1.68752	0.0915029	0.999868			ort011648	22.0805	7.88004	4.64547	1.69628	0.0898321	NA			ort008810	32.9039	-5.88201	3.42318	-1.71829
ort002103	1102.45	-4.09111	2.07038	-1.97603	0.0481519	NA			ort003218	18.919	7.6041	4.58007	1.66026	0.0968627	0.99619			ort008849	96.9039	-3.45896	2.09044	-1.65466	0.0979942	NA			ort002190	443.903	-2.49796	1.48045	-1.6873	0.0915462	0.999868			ort005444	77.2057	3.98521	2.35182	1.69452	0.090167	NA			ort009014	3174.9	2.17651	1.26696	1.7179
ort005743	703.283	-4.10638	2.07974	-1.97447	0.048328	NA			ort006934	18.919	7.6041	4.58007	1.66026	0.0968627	0.99619			ort003364	1197.88	-1.87401	1.13384	-1.6528	0.0983715	0.999594			ort006825	446.053	2.49453	1.4789	1.68675	0.0916518	0.999868			ort010211	1091.63	-2.22954	1.31594	-1.69426	0.0902155	0.995599			ort009082	59.7065	-4.37617	2.54805	-1.71746
ort005359	77.0707	-4.52142	2.29242	-1.97234	0.0485712	NA			ort011402	18.919	7.6041	4.58007	1.66026	0.0968627	0.99619			ort008964	45.9274	-4.67427	2.83108	-1.65106	0.0987273	NA			ort005214	672.251	-2.35755	1.39785	-1.68655	0.09169	0.999868			ort011327	184.177	-3.02765	1.78859	-1.69276	0.0905013	0.995599			ort003532	468.779	-2.5315	1.47464	-1.71669
ort003779	28.2649	6.70078	3.3988	1.97151	0.0486653	NA			ort009115	676.499	-1.93813	1.16803	-1.65932	0.0970505	0.99619			ort007575	155.517	2.91563	1.76722	1.64984	0.0989752	NA			ort006028	163.471	3.07881	1.82584	1.68624	0.0917489	0.999868			ort008832	3193.15	-2.08824	1.23422	-1.69195	0.0906553	0.995599			ort004167	413.789	-2.58109	1.50378	-1.7164
ort011468	658.463	4.13538	2.10007	1.96916	0.0489346	NA			ort006058	1126.57	-1.80843	1.09014	-1.6589	0.0971364	0.99619			ort003197	1105.47	-1.88598	1.14327	-1.64964	0.099017	0.999594			ort002201	44.0259	-4.80807	2.85139	-1.68622	0.0917538	NA			ort003800	62.9196	4.29145	2.53706	1.6915	0.0907407	NA			ort011202	4203.72	-2.15379	1.25594	-1.71488
ort006052	64677.4	-4.03293	2.05047	-1.96683	0.0492032	0.140172			ort005156	756.621	-1.90027	1.14702	-1.6567	0.0975793	0.99619			ort006564	21.665	-7.67321	4.65319	-1.64902	0.0991436	NA			ort000183	92.9027	3.6352	2.15609	1.68602	0.0917927	NA			ort011527	1880.96	-2.13721	1.26385	-1.69104	0.0908297	0.995599			ort005565	766.076	-2.37263	1.38374	-1.71465
ort006795	997.272	-4.06126	2.06852	-1.96337	0.0496036	NA			ort008110	1622.82	1.74097	1.05124	1.65611	0.0976998	0.99619			ort010035	154.94	2.90955	1.76733	1.6463	0.0997022	NA			ort004353	445.891	-2.49273	1.47861	-1.68586	0.091823	0.999868			ort009405	31.9128	5.94562	3.52099	1.68862	0.0912921	NA			ort010790	464.585	-2.52978	1.47555	-1.71446
ort008381	88.0873	-4.43482	2.25974	-1.96253	0.0497005	NA			ort004956	168.878	2.68487	1.62162	1.65567	0.097789	0.99619			ort005857	2374.51	1.75129	1.06399	1.64597	0.0997696	0.999594			ort005971	43.4627	4.82321	2.86202	1.68525	0.0919403	NA			ort007555	332.429	2.62525	1.55512	1.68813	0.091386	0.995599			ort008842	809.124	2.35686	1.37507	1.71399
ort006233	2874.36	-4.03405	2.05573	-1.96234	0.0497226	0.141105			ort010470	177.88	-2.63978	1.59442	-1.65564	0.0977953	0.99619			ort002188	10994.4	-1.65769	1.00713	-1.64595	0.0997749	0.999594			ort001473	3646.91	2.10959	1.25214	1.68479	0.09203	0.999868			ort001911	304.272	2.67193	1.58351	1.68735	0.0915363	0.995599			ort007947	53.8466	4.50027	2.62808	1.71238
ort000801	44.3591	-4.81354	2.45789	-1.9584	0.0501827	NA			ort003762	479.448	2.05443	1.24095	1.65553	0.0978179	0.99619			ort009387	734.391	-1.98987	1.20929	-1.64548	0.0998703	0.999594			ort000043	1479.99	-2.19333	1.30214	-1.6844	0.092104	0.999868			ort003146	534.528	2.41143	1.42943	1.68699	0.0916059	0.995599			ort010418	4161.86	2.14826	1.25485	1.71197
ort001592	27.5879	6.66581	3.40459	1.95789	0.0502432	NA			ort003588	95.067	3.26	1.97043	1.65446	0.0980343	0.99619			ort007334	27.5508	5.96764	3.62879	1.64452	0.100068	NA			ort002554	86.1436	-3.72168	2.20994	-1.68406	0.0921695	NA			ort000981	100.871	3.60865	2.13934	1.68681	0.0916404	NA			ort005064	179.154	-3.05839	1.78857	-1.70997
ort005934	230.797	-4.16502	2.12896	-1.95636	0.0504223	NA			ort011642	389.251	2.14238	1.29559	1.6536	0.0982093	0.99619			ort001987	61.1633	4.05697	2.46718	1.64437	0.100099	NA			ort010513	29.8296	5.89108	3.49912	1.68359	0.0922614	NA			ort002397	89.0384	3.7616	2.23107	1.68601	0.0917946	NA			ort011483	300.23	2.71648	1.58875	1.70982
ort010318	27.4186	6.65693	3.40609	1.95442	0.0506516	NA			ort010937	1060.17	-1.81148	1.09566	-1.65332	0.0982664	0.99619			ort010084	57.2681	4.16035	2.53223	1.64296	0.100392	NA			ort005482	54.9231	-4.37277	2.59809	-1.68307	0.0923608	NA			ort005639	780.163	2.28965	1.35831	1.68566	0.0918618	0.995599			ort002429	12423.7	-2.10761	1.23314	-1.70914
ort005541	880.566	-4.04075	2.06824	-1.95371	0.0507352	NA			ort005662	104.22	3.14709	1.90479	1.6522	0.0984934	0.99619			ort005969	400.997	-2.23166	1.35849	-1.64275	0.100435	0.999594			ort001965	20.737	7.83321	4.65534	1.68263	0.0924465	NA			ort004976	92.9826	3.70467	2.19789	1.68556	0.0918804	NA			ort003181	194.133	2.97729	1.74692	1.70431
ort003066	671.926	-4.05015	2.07435	-1.95249	0.0508804	NA			ort001547	27.9611	5.69758	3.44859	1.65215	0.0985045	0.99619			ort002775	441.486	2.18189	1.32838	1.64252	0.100483	0.999594			ort010011	20.737	7.83321	4.65534	1.68263	0.0924465	NA			ort007529	1100.14	-2.20766	1.31064	-1.68442	0.0921015	0.995599			ort005393	942.987	2.30135	1.3504	1.70419
ort002203	968.699	-4.03063	2.06559	-1.95133	0.0510182	NA			ort005852	1031.45	1.8144	1.09869	1.65143	0.0986511	0.99619			ort006385	1537.06	1.80101	1.09864	1.63931	0.101149	0.999594			ort011670	20.737	7.83321	4.65534	1.68263	0.0924465	NA			ort002357	4463.36	2.05104	1.21819	1.68367	0.092245	0.995599			ort010587	53.298	4.48484	2.63178	1.70411
ort002727	168.158	-4.20795	2.15718	-1.95067	0.0510963	NA			ort001434	116.37	-3.02013	1.82897	-1.65127	0.0986834	0.99619			ort010470	126.795	-3.09671	1.89037	-1.63815	0.101391	NA			ort006449	36.899	5.18287	3.08413	1.6805	0.0928607	NA			ort010699	568.649	-2.37777	1.4138	-1.68183	0.0926019	0.995599			ort011004	6343.83	2.11423	1.24075	1.70399
ort011011	87.4103	4.83734	2.48011	1.95046	0.0511219	NA			ort001722	2060.99	-1.70098	1.03037	-1.65084	0.0987704	0.99619			ort009471	736.122	-1.97306	1.20499	-1.63741	0.101545	0.999594			ort010520	54.0611	4.38364	2.60895	1.68023	0.0929124	NA			ort005534	70.1605	-4.07663	2.42413	-1.68169	0.0926297	NA			ort000058	110.605	3.47708	2.04069	1.70388
ort004380	165.035	-4.20956	2.15899	-1.94978	0.0512022	NA			ort008934	3140.01	1.65996	1.0057	1.65056	0.098829	0.99619			ort011083	636.639	-2.02202	1.23492	-1.63737	0.101553	0.999594			ort001216	1247.68	-2.20764	1.31468	-1.67922	0.0931101	0.999868			ort003763	26214	2.0023	1.19074	1.68156	0.0926532	0.995599			ort003072	398.928	-2.56692	1.50661	-1.70377
ort005762	350.334	-4.08736	2.09869	-1.94758	0.0514656	NA			ort010562	34.6383	4.98938	3.0234	1.65025	0.098891	0.99619			ort009067	601.263	-2.03856	1.24669	-1.63518	0.102011	0.999594			ort003501	64.3375	-4.10195	2.44335	-1.67882	0.0931871	NA			ort009208	375.941	-2.54615	1.51455	-1.68112	0.0927394	0.995599			ort005368	336.69	2.64234	1.5511	1.70352
ort006589	27.0801	6.63901	3.40915	1.94741	0.0514858	NA			ort009209	167.531	-2.67338	1.62102	-1.64919	0.099108	0.99619			ort004755	21.2317	-7.64406	4.67493	-1.63512	0.102024	NA			ort010238	797.007	2.29466	1.36719	1.67838	0.0932721	0.999868			ort010527	21.5898	7.84761	4.66954	1.6806	0.092841	NA			ort005382	1102.99	2.26851	1.332	1.70308
ort010066	236.582	4.2495	2.18307	1.94657	0.0515861	NA			ort009304	731.427	1.8964	1.15012	1.64887	0.0991745	0.99619			ort010937	1485.2	-1.79774	1.10028	-1.63389	0.102282	0.999594			ort003845	706.046	-2.31938	1.38409	-1.67574	0.093789	0.999868			ort010532	21.5898	7.84761	4.66954	1.6806	0.092841	NA			ort002847	1002.28	-2.28526	1.34257	-1.70215
ort003635	1842.77	-3.99628	2.05432	-1.9453	0.0517388	0.146262			ort004909	2989.08	1.66046	1.00734	1.64836	0.0992779	0.99619			ort009576	781.892	-1.94756	1.19198	-1.63389	0.102282	0.999594			ort003269	2404.04	-2.11988	1.26537	-1.6753	0.0938756	0.999868			ort003057	798.721	-2.26709	1.35107	-1.67799	0.0933483	0.995599			ort009576	620.078	-2.40037	1.41129	-1.70083
ort004300	700.714	-4.02876	2.0711	-1.94523	0.0517475	NA			ort005139	525.742	-2.00253	1.21553	-1.64745	0.0994657	0.99619			ort001541	38.4177	-5.01306	3.0692	-1.63334	0.102397	NA			ort004702	48.9802	-4.53663	2.71107	-1.67337	0.0942545	NA			ort001890	1044.67	2.20231	1.31347	1.6767	0.0936004	0.995599			ort001034	280.104	-2.72695	1.60641	-1.69754
ort011075	30.3882	-5.12548	2.63554	-1.94476	0.0518044	NA			ort003899	3877.15	-1.63642	0.994677	-1.64518	0.0999326	0.99619			ort001800	861.075	1.91726	1.17394	1.63319	0.102428	0.999594			ort008585	157.919	3.06983	1.8346	1.67329	0.0942694	0.999868			ort004998	799.721	-2.26306	1.35008	-1.67623	0.0936922	0.995599			ort011389	449.817	-2.50236	1.47439	-1.69722
ort001523	26.9109	6.62996	3.41071	1.94386	0.0519118	NA			ort007679	73.9226	3.55015	2.15988	1.64368	0.100243	0.99619			ort000959	131.424	3.03407	1.85798	1.633	0.10247	NA			ort008299	509.471	2.41236	1.44187	1.67307	0.0943127	0.999868			ort007224	1995.81	2.09736	1.25246	1.67458	0.0940158	0.995599			ort005930	3210.13	2.13275	1.257	1.6967
ort009754	336.363	-4.07927	2.09955	-1.94293	0.0520247	NA			ort006890	262.33	2.33699	1.42205	1.64339	0.100302	0.99619			ort008299	689.517	1.98455	1.21532	1.63294	0.102482	0.999594			ort001065	1664.29	-2.15019	1.28639	-1.6715	0.0946239	0.999868			ort009198	38.8011	5.21243	3.11401	1.67386	0.0941577	NA			ort006603	449.361	-2.50064	1.47417	-1.6963
ort002352	364.643	-4.07082	2.09522	-1.94291	0.052027	NA			ort001948	1899.41	-1.69827	1.0336	-1.64306	0.10037	0.99619			ort003149	229.749	-2.55224	1.56327	-1.63263	0.102547	0.999594			ort007379	88.6265	-3.6414	2.17959	-1.67068	0.0947847	NA			ort000846	1068.2	-2.19147	1.30937	-1.67368	0.0941939	0.995599			ort011118	63.4451	-4.19175	2.47164	-1.69594
ort001679	892.598	-4.01099	2.06457	-1.94277	0.0520441	NA			ort010356	18.446	7.56758	4.60807	1.64224	0.100539	0.99619			ort008507	63.9044	3.94363	2.41587	1.63239	0.102598	NA			ort001913	133.756	-3.1971	1.9177	-1.66715	0.0954837	NA			ort000461	910.945	-2.22569	1.32987	-1.67362	0.0942054	0.995599			ort005207	77.8507	-3.88433	2.29237	-1.69446
ort002617	143.171	-4.22279	2.17379	-1.94259	0.0520656	NA			ort011543	5172.94	1.61553	0.983828	1.64209	0.100572	0.99619			ort005121	48.324	4.41311	2.7066	1.6305	0.102997	NA			ort002471	339.206	-2.56412	1.5384	-1.66674	0.0955655	0.999868			ort010468	55.4414	-4.43277	2.64889	-1.67344	0.0942398	NA			ort000330	1714.81	-2.18339	1.28927	-1.69351
ort007224	578.838	4.07146	2.09744	1.94116	0.0522392	NA			ort001346	49.9403	4.16158	2.53475	1.64181	0.100629	0.99619			ort000550	1067.49	-1.85814	1.13966	-1.63043	0.103011	0.999594			ort011289	11765.2	-2.03091	1.21861	-1.66658	0.0955984	0.999868			ort001516	3669.76	2.04236	1.22049	1.67338	0.0942517	0.995599			ort005187	107.211	-3.48722	2.05988	-1.69292
ort008116	209.548	4.268	2.19934	1.94059	0.0523084	NA			ort001075	1023.42	-1.79903	1.09591	-1.64158	0.100676	0.99619			ort011013	7643.82	1.64235	1.00771	1.62979	0.103147	0.999594			ort011306	20.2312	7.79759	4.67979	1.66623	0.0956684	NA			ort000776	75.243	3.94568	2.3589	1.67268	0.0943906	NA			ort002307	256.669	-2.76503	1.63372	-1.69247
ort000154	8.86259	-8.15302	4.20581	-1.93851	0.0525609	NA			ort008885	761.168	1.87199	1.14044	1.64147	0.1007	0.99619			ort000744	752.58	-1.95122	1.1973	-1.62969	0.103168	0.999594			ort007311	198.254	-2.87575	1.7264	-1.66574	0.0957642	0.999868			ort005173	102.853	3.53814	2.11644	1.67174	0.0945746	NA			ort004113	21.4183	-7.72944	4.56753	-1.69226
ort004122	8.86259	-8.15302	4.20581	-1.93851	0.0525609	NA			ort001426	1155.89	-1.7737	1.08062	-1.64138	0.100719	0.99619			ort007050	19.04	7.9	4.84789	1.62957	0.103191	NA			ort005495	807.525	2.26104	1.358	1.66497	0.0959181	0.999868			ort008113	415.872	-2.4777	1.48223	-1.6716	0.0946041	0.995599			ort007280	7797.57	2.08267	1.23138	1.69133
ort004490	8.86259	-8.15302	4.20581	-1.93851	0.0525609	NA			ort000189	422.832	2.08014	1.26747	1.64117	0.100762	0.99619			ort006443	183.508	2.7143	1.66623	1.62901	0.103311	NA			ort007206	22206.4	-2.01792	1.21234	-1.66448	0.0960162	0.999868			ort008476	1356.35	-2.1406	1.28189	-1.66987	0.0949449	0.995599			ort001024	3789.81	2.11014	1.24824	1.69049
ort005060	8.86259	-8.15302	4.20581	-1.93851	0.0525609	NA			ort003383	101.848	-3.1355	1.9111	-1.64068	0.100864	0.99619			ort003971	4651.55	1.66477	1.02202	1.6289	0.103335	0.999594			ort008476	926.532	-2.22929	1.33958	-1.66417	0.0960791	0.999868			ort003066	695.008	-2.28607	1.3698	-1.6689	0.0951368	0.995599			ort002598	47.3563	4.64265	2.74796	1.68949
ort005257	8.86259	-8.15302	4.20581	-1.93851	0.0525609	NA			ort008741	873.371	1.83368	1.11796	1.6402	0.100963	0.99619			ort006074	44.6275	-4.6312	2.84435	-1.62821	0.10348	NA			ort004311	569.06	-2.35465	1.41507	-1.66398	0.0961158	0.999868			ort008957	1312.85	-2.14279	1.28441	-1.6683	0.0952552	0.995599			ort005419	106.755	-3.48053	2.06038	-1.68926
ort006097	8.86259	-8.15302	4.20581	-1.93851	0.0525609	NA			ort011011	305.481	2.23945	1.36571	1.63977	0.101053	0.99619			ort006424	1470.47	-1.78893	1.09875	-1.62816	0.103491	0.999594			ort003335	235.475	-2.75689	1.65685	-1.66394	0.0961248	0.999868			ort004686	102.362	3.53065	2.11705	1.66772	0.0953714	NA			ort007575	65.6371	4.0878	2.42009	1.68911
ort007590	8.86259	-8.15302	4.20581	-1.93851	0.0525609	NA			ort002099	34.1654	4.96891	3.03132	1.63919	0.101174	0.99619			ort000330	1705.53	-1.76225	1.0832	-1.62689	0.10376	0.999594			ort001633	596.051	2.33906	1.4061	1.66351	0.0962106	0.999868			ort007063	489.631	2.40083	1.43993	1.66732	0.0954499	0.995599			ort005857	2390.47	2.13643	1.26612	1.68738
ort010630	8.86259	-8.15302	4.20581	-1.93851	0.0525609	NA			ort010096	39.8966	4.59453	2.80364	1.63877	0.101261	0.99619			ort005769	56.1142	4.12932	2.53981	1.62584	0.103984	NA			ort006989	20.2657	-7.76686	4.67378	-1.6618	0.0965538	NA			ort000720	325.069	2.58764	1.55199	1.66731	0.0954538	0.995599			ort007685	1081.14	2.23778	1.32663	1.68681
ort011007	8.86259	-8.15302	4.20581	-1.93851	0.0525609	NA			ort005667	628.654	1.92439	1.1744	1.63862	0.101293	0.99619			ort002692	135.175	2.98428	1.8361	1.62534	0.10409	NA			ort008517	4280.31	2.05256	1.23533	1.66155	0.0966035	0.999868			ort000866	20.8895	-7.85433	4.71179	-1.66695	0.095524	NA			ort002427	653.826	-2.35384	1.39546	-1.68678
ort009728	616.381	-4.01596	2.0726	-1.93765	0.0526665	NA			ort011595	173.774	2.61989	1.59906	1.63839	0.10134	0.99619			ort006865	82.174	-3.57862	2.20235	-1.62491	0.104181	NA			ort002850	377.439	-2.50153	1.50591	-1.66115	0.0966843	0.999868			ort006787	20.8895	-7.85433	4.71179	-1.66695	0.095524	NA			ort001507	6444.27	2.07925	1.23277	1.68665
ort004235	720.731	4.03794	2.08505	1.93661	0.052793	NA			ort006316	274.165	-2.29715	1.40243	-1.63798	0.101426	0.99619			ort011118	82.174	-3.57862	2.20235	-1.62491	0.104181	NA			ort001390	28.818	5.84045	3.51781	1.66025	0.0968634	NA			ort009810	20.8895	-7.85433	4.71179	-1.66695	0.095524	NA			ort005942	2362.87	2.13418	1.266	1.68576
ort009919	39.7586	-4.82592	2.49411	-1.93493	0.0529989	NA			ort003627	600.026	1.93757	1.18332	1.6374	0.101547	0.99619			ort007578	279.456	2.39552	1.47431	1.62484	0.104196	0.999594			ort004082	242.924	-2.72762	1.64306	-1.66009	0.0968972	0.999868			ort003197	1485.24	-2.12031	1.27211	-1.66676	0.0955612	0.995599			ort005769	98.2655	3.54649	2.1054	1.68447
ort004834	42.882	-4.76291	2.4619	-1.93465	0.0530333	NA			ort001692	233.993	-2.3957	1.46323	-1.63726	0.101576	0.99619			ort010911	2966.88	-1.69098	1.041	-1.62438	0.104295	0.999594			ort007034	41.9453	4.7701	2.87619	1.65848	0.0972204	NA			ort004889	1250.9	2.14788	1.28869	1.66672	0.0955709	0.995599			ort003246	72.2893	-3.95149	2.34633	-1.68412
ort007231	1997.9	-3.9615	2.04988	-1.93255	0.0532912	0.150073			ort011227	3289.2	-1.6347	0.99872	-1.63679	0.101674	0.99619			ort001416	379.301	2.21649	1.36525	1.62351	0.104481	0.999594			ort009479	157.574	-3.02909	1.82671	-1.65822	0.0972721	0.999868			ort005795	1827.48	-2.08848	1.25447	-1.66483	0.0959457	0.995599			ort008112	5563.03	2.07922	1.23472	1.68397
ort004432	14.9402	-6.44736	3.33702	-1.93207	0.0533507	NA			ort008501	4914.15	1.60846	0.983255	1.63585	0.101871	0.99619			ort003017	1001.5	-1.85948	1.14578	-1.62289	0.104612	0.999594			ort009550	47.9916	-4.50593	2.71819	-1.6577	0.0973789	NA			ort001590	21.0991	7.81445	4.69454	1.66458	0.095996	NA			ort008884	3470.06	2.10153	1.24824	1.6836
ort009493	14.9402	-6.44736	3.33702	-1.93207	0.0533507	NA			ort003179	229.347	-2.40528	1.47068	-1.6355	0.101945	0.99619			ort006043	4069.06	1.66197	1.02448	1.62226	0.104748	0.999594			ort009767	172.46	-2.95287	1.78253	-1.65656	0.0976088	0.999868			ort010528	21.0991	7.81445	4.69454	1.66458	0.095996	NA			ort006248	144.6	3.15638	1.87498	1.68342
ort002341	1129.73	-3.97148	2.05673	-1.93097	0.0534866	NA			ort004959	4836.47	1.60821	0.983518	1.63516	0.102016	0.99619			ort006914	20.7984	-7.61431	4.69742	-1.62096	0.105027	NA			ort004473	4934.12	2.03317	1.22827	1.65532	0.0978598	0.999868			ort001227	1382.07	-2.12599	1.27757	-1.66409	0.0960949	0.995599			ort001920	321.144	-2.61797	1.55577	-1.68274
ort005224	157.172	4.34206	2.25098	1.92896	0.0537356	NA			ort009368	160.242	-2.67017	1.6358	-1.63234	0.102608	0.99619			ort011318	20.7984	-7.61431	4.69742	-1.62096	0.105027	NA			ort011551	691.184	2.27824	1.37634	1.65528	0.0978675	0.999868			ort005457	668.173	-2.28378	1.3738	-1.66238	0.0964368	0.995599			ort001111	19.7495	7.88005	4.68339	1.68255
ort008226	22.6642	-5.4474	2.82755	-1.92655	0.0540364	NA			ort002707	364.212	2.13199	1.30623	1.63218	0.102642	0.99619			ort000473	464.526	-2.11498	1.30496	-1.62072	0.105077	0.999594			ort003001	367.933	2.49728	1.50906	1.65486	0.0979524	0.999868			ort010757	1414.91	-2.11767	1.27436	-1.66176	0.096561	0.995599			ort008432	19.7495	7.88005	4.68339	1.68255
ort005225	1032.74	-3.96168	2.05689	-1.92605	0.054098	NA			ort000558	44.682	4.3315	2.65409	1.63201	0.102678	0.99619			ort006603	510.585	-2.07229	1.27931	-1.61984	0.105266	0.999594			ort003345	111.938	-3.33137	2.0132	-1.65477	0.0979718	NA			ort009183	1065.07	2.16565	1.30406	1.6607	0.0967736	0.995599			ort009679	38.921	-5.10733	3.03586	-1.68233
ort005620	26.0646	6.58387	3.41887	1.92574	0.0541367	NA			ort006295	25.8443	-5.74519	3.52239	-1.63105	0.10288	0.99619			ort000309	43.2749	4.58303	2.8293	1.61984	0.105266	NA			ort003612	104.995	-3.39679	2.05317	-1.65441	0.0980436	NA			ort006347	750.563	-2.24153	1.35194	-1.65801	0.097316	0.995599			ort003024	4131.49	-2.08929	1.24194	-1.68228
ort010042	1793.23	-3.94492	2.04892	-1.92537	0.0541832	0.151691			ort007106	566.638	-1.94497	1.19252	-1.63098	0.102895	0.99619			ort007917	287.649	-2.36595	1.4619	-1.61841	0.105574	0.999594			ort000248	583.935	2.32101	1.40421	1.6529	0.0983515	0.999868			ort001130	128.943	-3.24963	1.96061	-1.65746	0.0974273	NA			ort000558	41.4147	4.87246	2.9014	1.67935
ort005703	39853.7	-3.92355	2.03862	-1.92461	0.0542784	0.151691			ort002775	505.934	1.98531	1.21791	1.6301	0.103081	0.99619			ort009791	4057.27	-1.65587	1.02317	-1.61837	0.105583	0.999594			ort008503	1479.56	2.12261	1.28516	1.65163	0.09861	0.999868			ort002598	50.1243	4.56037	2.75174	1.65727	0.0974656	NA			ort003412	8085.98	-2.05499	1.22487	-1.67772
ort005042	107.674	4.54216	2.36092	1.9239	0.0543676	NA			ort005874	428.4	-2.05183	1.25892	-1.62983	0.103137	0.99619			ort007783	572.358	2.02185	1.24948	1.61816	0.105628	0.999594			ort004331	1161.39	2.15842	1.30712	1.65128	0.0986823	0.999868			ort011491	3628.69	2.01195	1.21409	1.65717	0.0974845	0.995599			ort001093	20.9626	-7.69841	4.58927	-1.67748
ort010358	511.83	-3.9904	2.0747	-1.92336	0.0544345	NA			ort010724	9408.41	1.57415	0.96613	1.62934	0.103241	0.99619			ort003878	3173.75	1.67369	1.03452	1.61784	0.105697	0.999594			ort007224	2137.52	2.0782	1.25913	1.65051	0.0988389	0.999868			ort002377	3288.17	-2.00842	1.21582	-1.6519	0.0985541	0.995599			ort002866	80.0776	3.77013	2.24797	1.67712
ort006023	102.566	-4.26299	2.21748	-1.92245	0.0545496	NA			ort006033	676.396	1.88262	1.15633	1.6281	0.103503	0.99619			ort003762	524.743	2.05428	1.27019	1.61731	0.105812	0.999594			ort004716	248.396	-2.68729	1.62894	-1.64971	0.0990019	0.999868			ort008501	6214.89	1.97398	1.1955	1.65118	0.0987028	0.995599			ort002130	491.591	-2.42094	1.44443	-1.67604
ort004970	83.3483	4.76623	2.47972	1.92209	0.0545948	NA			ort005901	61.4585	3.75852	2.31232	1.62543	0.10407	0.99619			ort003024	3498.94	-1.66484	1.02944	-1.61722	0.10583	0.999594			ort005178	19.7255	7.76106	4.7053	1.64943	0.0990598	NA			ort001779	2415.97	2.03133	1.23048	1.65084	0.0987706	0.995599			ort007965	28.4341	5.93998	3.54434	1.67591
ort011238	1215.93	-3.94503	2.05288	-1.9217	0.0546435	NA			ort011371	505.99	1.97616	1.21595	1.6252	0.104121	0.99619			ort009563	812.022	1.90012	1.17633	1.61529	0.106248	0.999594			ort010204	19.7255	7.76106	4.7053	1.64943	0.0990598	NA			ort010952	752.195	2.22596	1.34844	1.65077	0.0987847	0.995599			ort001987	87.0236	3.65994	2.18465	1.6753
ort000465	746.642	-3.96199	2.06245	-1.92101	0.0547305	NA			ort007732	513.78	1.96687	1.21165	1.6233	0.104526	0.99619			ort006873	315.24	2.29717	1.42341	1.61385	0.10656	0.999594			ort003897	57.4061	-4.16318	2.52421	-1.6493	0.0990864	NA			ort005945	580.65	2.30324	1.39532	1.65069	0.0988017	0.995599			ort010071	154.652	3.07499	1.83592	1.67491
ort004777	273.894	4.13279	2.15258	1.91992	0.0548679	NA			ort005497	57.6979	-3.83272	2.36251	-1.62231	0.104737	0.99619			ort001586	235.956	-2.48441	1.5408	-1.61242	0.106872	0.999594			ort003866	1020.95	-2.17478	1.3195	-1.64818	0.0993156	0.999868			ort011451	335.898	-2.53051	1.53324	-1.65043	0.0988556	0.995599			ort011524	38.4653	-5.08984	3.04165	-1.67338
ort002699	3407.66	-3.91957	2.04217	-1.91931	0.0549448	0.152971			ort001201	243.174	-2.33589	1.44074	-1.62132	0.10495	0.99619			ort001955	573.104	-2.00599	1.2462	-1.60968	0.107468	0.999594			ort002857	161.551	-2.97679	1.80752	-1.6469	0.0995795	0.999868			ort011558	1647.61	2.07292	1.25619	1.65016	0.0989103	0.995599			ort004055	130.646	-3.22559	1.92827	-1.67279
ort006907	132.493	-4.17733	2.17659	-1.91921	0.0549576	NA			ort000911	479.171	-1.98774	1.22669	-1.62041	0.105143	0.99619			ort005493	18.463	7.8556	4.88407	1.60841	0.107745	NA			ort002069	167.505	-2.9477	1.7901	-1.64667	0.0996257	0.999868			ort003335	378.885	-2.47086	1.49743	-1.65007	0.0989296	0.995599			ort001484	2345.76	2.10842	1.26053	1.67264
ort003768	461.901	4.03321	2.10332	1.91755	0.0551685	NA			ort006385	1176.01	1.73491	1.07097	1.61994	0.105244	0.99619			ort005876	826.501	-1.88022	1.17012	-1.60686	0.108086	0.999594			ort001957	164.034	-2.95703	1.7985	-1.64416	0.100143	0.999868			ort005874	720.181	-2.23602	1.35518	-1.64999	0.0989455	0.995599			ort009395	61.6222	-4.14736	2.48021	-1.67218
ort005634	490.135	-3.97627	2.07442	-1.91681	0.0552627	NA			ort004878	608.59	-1.89941	1.1731	-1.61914	0.105418	0.99619			ort002457	996.01	-1.82977	1.13936	-1.60596	0.108283	0.999594			ort008892	7745.26	1.99249	1.21262	1.64313	0.100356	0.999868			ort006630	103.853	3.45813	2.0962	1.64972	0.0990011	NA			ort008970	529.348	-2.38548	1.42704	-1.67164
ort004178	129.969	4.39213	2.29319	1.91529	0.0554556	NA			ort009387	596.238	-1.9027	1.17653	-1.61721	0.105833	0.99619			ort008022	565.434	1.99994	1.24627	1.60474	0.10855	0.999594			ort005131	210.186	-2.77417	1.68861	-1.64287	0.100409	0.999868			ort000299	20.38	-7.81871	4.73996	-1.64953	0.0990387	NA			ort007652	93.421	3.56225	2.13167	1.67111
ort005941	647.831	-3.95401	2.06461	-1.91514	0.055475	NA			ort006782	36.8331	-4.6414	2.8702	-1.6171	0.105857	0.99619			ort000820	43.3276	-4.58681	2.85834	-1.60471	0.108557	NA			ort009998	2318.15	2.05442	1.25068	1.64264	0.100458	0.999868			ort004281	20.6084	7.7805	4.72121	1.64799	0.0993548	NA			ort008828	528.892	-2.384	1.42683	-1.67084
ort002267	186.099	-4.08957	2.13554	-1.91501	0.0554916	NA			ort000262	233.882	-2.35185	1.45446	-1.61699	0.10588	0.99619			ort007119	595.916	-1.97885	1.23426	-1.60326	0.108877	0.999594			ort000779	991.181	2.16798	1.31995	1.64247	0.100492	0.999868			ort006744	20.6084	7.7805	4.72121	1.64799	0.0993548	NA			ort007309	46.2592	4.60746	2.75772	1.67075
ort003185	25.7877	-5.21294	2.72294	-1.91445	0.055563	NA			ort004928	2177.34	-1.63873	1.0143	-1.61564	0.106172	0.99619			ort001634	890.463	-1.85079	1.15532	-1.60198	0.109161	0.999594			ort001634	807.467	-2.20831	1.34562	-1.64111	0.100775	0.999868			ort008313	20.6084	7.7805	4.72121	1.64799	0.0993548	NA			ort004175	422.465	-2.46626	1.47615	-1.67073
ort002769	247.537	4.13916	2.16306	1.91357	0.0556751	NA			ort006887	1695.27	1.66728	1.03272	1.61446	0.106428	0.99619			ort006196	547.112	-2.00618	1.25326	-1.60077	0.109429	0.999594			ort003847	410.245	-2.41596	1.47307	-1.64008	0.100988	0.999868			ort006141	3202.63	-2.00191	1.21511	-1.64752	0.0994517	0.995599			ort004667	130.19	-3.22	1.92847	-1.66972
ort000083	452.484	-3.97349	2.07663	-1.91343	0.0556925	NA			ort010360	26.5422	5.62096	3.48363	1.61353	0.106629	0.99619			ort001226	409.367	-2.1293	1.3314	-1.59929	0.109756	0.999594			ort011586	464.364	-2.36787	1.44394	-1.63986	0.101034	0.999868			ort000689	881.259	2.17826	1.32268	1.64685	0.0995889	0.995599			ort004891	1887.24	2.12349	1.27185	1.66962
ort008509	200.239	4.19896	2.19505	1.91292	0.0557582	NA			ort000425	905.208	-1.7783	1.10243	-1.61307	0.10673	0.99619			ort008842	690.101	1.91945	1.2002	1.59927	0.10976	0.999594			ort008654	77.7292	-3.69719	2.25476	-1.63973	0.101062	NA			ort005346	424.957	2.41107	1.46472	1.6461	0.0997429	0.995599			ort006182	646.721	-2.31731	1.38873	-1.66866
ort003325	2001.91	3.91977	2.04983	1.91225	0.0558445	0.154889			ort008362	509.05	1.9501	1.20942	1.61242	0.10687	0.99619			ort010945	2701.51	1.65706	1.03627	1.59905	0.109808	0.999594			ort006484	325.608	2.51649	1.53485	1.63957	0.101094	0.999868			ort005425	1453.65	-2.08207	1.26502	-1.64587	0.09979	0.995599			ort004093	4831.67	-2.05327	1.23114	-1.66778
ort006003	2517.01	-3.89936	2.04151	-1.91004	0.0561281	0.155091			ort011599	583.361	1.90178	1.1795	1.61237	0.106882	0.99619			ort009930	50.4882	4.20319	2.63008	1.59812	0.110016	NA			ort005892	1071.66	-2.1437	1.30882	-1.63788	0.101446	0.999868			ort001391	971.749	2.15359	1.30881	1.64545	0.0998772	0.995599			ort010468	30.6253	-5.77666	3.46416	-1.66755
ort009974	1544.03	-3.90731	2.04612	-1.90961	0.0561828	NA			ort011038	890.453	1.77959	1.1044	1.61136	0.107101	0.99619			ort002108	111.631	-3.11667	1.9509	-1.59755	0.110143	NA			ort003800	83.8102	3.59011	2.19416	1.63621	0.101795	NA			ort005743	653.926	-2.25376	1.36992	-1.64518	0.0999332	0.995599			ort001445	572.304	-2.35067	1.40986	-1.66731
ort004476	802.91	-3.92509	2.05699	-1.90817	0.0563695	NA			ort004998	1031.93	-1.74625	1.08377	-1.61127	0.107121	0.99619			ort004340	614.782	1.95448	1.22372	1.59716	0.11023	0.999594			ort007036	244.441	-2.66051	1.62659	-1.63564	0.101915	0.999868			ort004719	574.743	2.29456	1.39482	1.64506	0.0999576	0.995599			ort002002	546.393	2.36421	1.418	1.66729
ort004817	175.067	4.22908	2.21733	1.90728	0.056484	NA			ort007311	632.599	-1.87193	1.1622	-1.61068	0.107249	0.99619			ort004070	418.174	-2.11411	1.3239	-1.59688	0.110292	0.999594			ort007471	60.8775	-4.01741	2.45708	-1.63504	0.102041	NA			ort009154	152.221	3.05943	1.86005	1.64481	0.100009	0.995599			ort006457	1298.25	-2.16692	1.29979	-1.66714
ort004643	121.645	-4.16297	2.18461	-1.90559	0.0567034	NA			ort003560	869.209	-1.78199	1.10714	-1.60954	0.107498	0.99619			ort006374	1104.5	1.78602	1.11956	1.59528	0.110649	0.999594			ort011559	3561.9	2.00782	1.22803	1.63499	0.102051	0.999868			ort001544	194.235	-2.85734	1.73801	-1.64403	0.10017	0.995599			ort000425	1094.6	-2.19325	1.31624	-1.66629
ort000121	25.0491	6.52653	3.42949	1.90306	0.0570322	NA			ort005621	607.422	-1.88247	1.16974	-1.60931	0.107549	0.99619			ort009296	17546.3	1.5637	0.980765	1.59437	0.110854	0.999594			ort003189	162.057	-2.93726	1.7979	-1.63372	0.102317	0.999868			ort005485	643.302	-2.25565	1.37227	-1.64374	0.100231	0.995599			ort005876	885.298	-2.23335	1.34083	-1.66564
ort005008	35631.7	-3.86742	2.0323	-1.90298	0.0570437	0.15703			ort003612	135.9	-2.75821	1.7143	-1.60895	0.107628	0.99619			ort004453	83.1843	-3.46131	2.17129	-1.59413	0.110908	NA			ort003440	371.036	-2.44226	1.49513	-1.63348	0.102368	0.999868			ort005419	126.905	-3.22421	1.96198	-1.64335	0.100311	NA			ort009183	1088.52	2.18744	1.31514	1.66328
ort003971	2418.19	3.88182	2.04349	1.8996	0.0574854	0.157656			ort002692	116.851	2.90741	1.8071	1.60889	0.107641	0.99619			ort007052	128.395	2.94772	1.84953	1.59377	0.110988	NA			ort009141	664.986	-2.23767	1.37073	-1.63246	0.102582	0.999868			ort003532	427.911	-2.39888	1.46087	-1.64209	0.100572	0.995599			ort002099	19.2009	7.8394	4.71359	1.66315
ort010368	612.673	-3.91534	2.06148	-1.89928	0.0575273	NA			ort010167	1055.46	-1.73686	1.07985	-1.60843	0.107742	0.99619			ort008819	457.88	-2.06587	1.29632	-1.59364	0.111017	0.999594			ort000975	19.2197	7.72359	4.73195	1.63222	0.102633	NA			ort011475	603.353	-2.27131	1.38351	-1.6417	0.100653	0.995599			ort004831	19.2009	7.8394	4.71359	1.66315
ort008265	1013.92	-3.88811	2.04888	-1.89768	0.0577386	NA			ort002354	48.0484	4.10268	2.55111	1.6082	0.107792	0.99619			ort008112	5038.01	1.60008	1.00472	1.59256	0.111259	0.999594			ort006860	158.585	-2.94663	1.80668	-1.63096	0.102899	0.999868			ort003840	1003.21	-2.1357	1.30228	-1.63997	0.101011	0.995599			ort010598	19.2009	7.8394	4.71359	1.66315
ort008034	164.404	-4.05838	2.14237	-1.89434	0.0581793	NA			ort000174	1612.65	-1.66365	1.03463	-1.60797	0.107843	0.99619			ort004149	968.139	-1.81174	1.13785	-1.59225	0.111328	0.999594			ort008884	2693.52	2.01805	1.23739	1.63089	0.102913	0.999868			ort008842	723.094	2.21159	1.34956	1.63874	0.101267	0.995599			ort001473	4776.49	2.04454	1.22933	1.66313
ort001332	18.0637	-5.71042	3.01489	-1.89407	0.0582156	NA			ort002157	258.53	-2.26751	1.41087	-1.60716	0.108018	0.99619			ort003699	174.42	2.65968	1.67183	1.59088	0.111638	NA			ort005290	64.8433	-3.9093	2.3972	-1.63078	0.102937	NA			ort009304	1280.85	2.08689	1.27389	1.6382	0.10138	0.995599			ort000670	44.4824	-4.70193	2.82748	-1.66294
ort006298	18.0637	-5.71042	3.01489	-1.89407	0.0582156	NA			ort005547	242.187	2.30759	1.43665	1.60623	0.108224	0.99619			ort011227	4430.48	-1.60478	1.00879	-1.5908	0.111655	0.999594			ort011361	102.03	-3.35147	2.05528	-1.63066	0.102962	NA			ort006196	538.117	-2.30099	1.40504	-1.63767	0.10149	0.995599			ort010844	20.5069	-7.6667	4.61185	-1.66239
ort008437	18.0637	-5.71042	3.01489	-1.89407	0.0582156	NA			ort006041	2205.12	1.62203	1.01013	1.60576	0.108326	0.99619			ort004940	264.688	-2.35522	1.48081	-1.59049	0.111724	0.999594			ort003400	76.7407	-3.67729	2.25703	-1.62926	0.103258	NA			ort010902	282.248	-2.58852	1.58317	-1.63503	0.102044	0.995599			ort005089	1898.43	-2.10686	1.26804	-1.66151
ort008469	18.0637	-5.71042	3.01489	-1.89407	0.0582156	NA			ort010496	563.051	1.90087	1.18415	1.60526	0.108436	0.99619			ort009795	352.044	-2.18488	1.37466	-1.5894	0.11197	0.999594			ort010110	8200.23	1.9628	1.20487	1.62906	0.103301	0.999868			ort007664	250.034	2.66096	1.6278	1.6347	0.102112	0.995599			ort007480	490.834	2.38568	1.43657	1.66068
ort009385	18.0637	-5.71042	3.01489	-1.89407	0.0582156	NA			ort001022	17.5001	7.49162	4.66835	1.60477	0.108544	0.99619			ort000542	41.544	4.52162	2.84896	1.58711	0.112487	NA			ort004505	529.437	-2.29687	1.41026	-1.62868	0.10338	0.999868			ort002003	5551.07	1.94682	1.19123	1.63429	0.102198	0.995599			ort003167	128.823	-3.20313	1.92907	-1.66045
ort011420	18.0637	-5.71042	3.01489	-1.89407	0.0582156	NA			ort009214	163.258	2.58969	1.61437	1.60415	0.108681	0.99619			ort002141	17.886	7.80979	4.92218	1.58665	0.112591	NA			ort001219	3082.51	-2.00282	1.23017	-1.62808	0.103507	0.999868			ort005513	48.6523	4.51552	2.76498	1.63311	0.102445	NA			ort007694	419.56	2.44316	1.47168	1.66011
ort011613	18.0637	-5.71042	3.01489	-1.89407	0.0582156	NA			ort002326	882.83	1.76847	1.10283	1.60357	0.108808	0.99619			ort008580	17.886	7.80979	4.92218	1.58665	0.112591	NA			ort008107	192.139	2.7935	1.71647	1.62746	0.103639	0.999868			ort005634	48.6523	4.51552	2.76498	1.63311	0.102445	NA			ort001712	60.7108	-4.12464	2.48485	-1.65992
ort011674	213.41	-4.0035	2.11608	-1.89194	0.0584984	NA			ort006873	297.969	2.17847	1.35869	1.60336	0.108856	0.99619			ort011190	17.886	7.80979	4.92218	1.58665	0.112591	NA			ort007681	5199.12	1.96992	1.21206	1.62526	0.104106	0.999868			ort010318	71.8082	3.87378	2.37226	1.63295	0.102479	NA			ort009471	614.897	-2.3109	1.39291	-1.65905
ort010269	1452.36	-3.86246	2.04163	-1.89185	0.0585109	NA			ort005989	2312.63	-1.61244	1.006	-1.60282	0.108974	0.99619			ort006081	502.35	-2.01177	1.26814	-1.58639	0.112651	0.999594			ort000846	1091.09	-2.1132	1.30037	-1.62507	0.104147	0.999868			ort009387	600.277	-2.25415	1.38051	-1.63285	0.102501	0.995599			ort005444	85.3778	3.6302	2.18819	1.65899
ort004109	1344.97	-3.86302	2.04251	-1.89131	0.0585834	NA			ort002357	3421.39	1.5793	0.985413	1.60268	0.109005	0.99619			ort008726	57.1245	3.95227	2.49144	1.58634	0.112661	NA			ort010757	2431.99	-2.01254	1.2391	-1.6242	0.104333	0.999868			ort001506	3249.6	1.97273	1.2083	1.63265	0.102542	0.995599			ort002025	547.045	-2.3449	1.41414	-1.65819
ort010017	1330.83	-3.86189	2.04251	-1.89076	0.0586569	NA			ort011025	189.883	2.4677	1.53981	1.6026	0.109024	0.99619			ort001502	5399.33	1.5845	0.999579	1.58517	0.112929	0.999594			ort006385	1675.65	2.04839	1.26158	1.62368	0.104445	0.999868			ort003713	3227.01	-1.97317	1.20858	-1.63264	0.102545	0.995599			ort003773	491.838	2.37928	1.43492	1.65813
ort000215	448.899	-3.91399	2.07018	-1.89065	0.0586705	NA			ort005980	24.7872	-5.68379	3.55167	-1.60031	0.109529	0.99619			ort009208	283.17	-2.29663	1.45041	-1.58343	0.113324	0.999594			ort007009	404.82	-2.37976	1.46676	-1.62245	0.104706	0.999868			ort011083	763.547	-2.18197	1.33738	-1.63153	0.102779	0.995599			ort011558	1608.53	2.1177	1.27756	1.65761
ort003839	56.8221	5.22758	2.7663	1.88974	0.058793	NA			ort004055	127.609	-2.79395	1.74643	-1.5998	0.109642	0.99619			ort011650	28.7414	-5.60914	3.54414	-1.58265	0.113501	NA			ort008952	882.852	2.14696	1.32369	1.62195	0.104814	0.999868			ort001547	29.4594	5.82826	3.57241	1.63146	0.102793	NA			ort006903	560.725	-2.33569	1.4091	-1.65758
ort003968	643.445	-3.88503	2.05702	-1.88867	0.0589357	NA			ort001226	440.418	-1.98294	1.23956	-1.59972	0.109661	0.99619			ort005207	52.7142	-4.11038	2.59814	-1.58205	0.113639	NA			ort011589	39.9222	4.6961	2.89647	1.62132	0.104949	NA			ort005849	1334.2	-2.06663	1.26684	-1.63133	0.102821	0.995599			ort008773	1834.14	-2.101	1.26816	-1.65673
ort002635	1143.21	-3.85715	2.04384	-1.88721	0.059132	NA			ort000720	405.749	2.01801	1.26174	1.59939	0.109734	0.99619			ort007227	2097.52	1.65447	1.04655	1.58088	0.113905	0.999594			ort011673	39.9222	4.6961	2.89647	1.62132	0.104949	NA			ort001022	20.1177	7.74573	4.74815	1.63131	0.102824	NA			ort002687	1995.02	-2.09179	1.26273	-1.65655
ort008919	253.045	-3.96456	2.10109	-1.88691	0.0591731	NA			ort009043	83.6045	3.2547	2.03509	1.59929	0.109755	0.99619			ort001321	42.0277	-4.54101	2.87282	-1.58068	0.113952	NA			ort002003	4254.72	1.96833	1.21497	1.62006	0.105219	0.999868			ort004419	20.1177	7.74573	4.74815	1.63131	0.102824	NA			ort005066	249.47	-2.69035	1.62465	-1.65596
ort008549	1919.75	-3.8428	2.03697	-1.88652	0.0592245	0.161821			ort004576	59.5666	3.71002	2.32291	1.59715	0.110233	0.99619			ort003773	502.096	1.9981	1.26446	1.5802	0.114062	0.999594			ort000425	1218.26	-2.08278	1.28623	-1.61929	0.105384	0.999868			ort007216	20.1177	7.74573	4.74815	1.63131	0.102824	NA			ort007935	14558.3	2.00038	1.20821	1.65565
ort001372	699.037	-3.87226	2.05378	-1.88543	0.0593718	NA			ort004070	483.011	-1.94106	1.21546	-1.59697	0.110272	0.99619			ort011543	6655.68	1.56655	0.99154	1.57992	0.114126	0.999594			ort001523	54.5554	4.12061	2.54509	1.61904	0.105438	NA			ort001019	459.218	-2.34401	1.43777	-1.63031	0.103036	0.995599			ort009498	218.92	-2.77073	1.67359	-1.65556
ort003717	1206.87	-3.84805	2.04216	-1.88431	0.0595232	NA			ort002469	302.865	2.15609	1.35034	1.59671	0.110331	0.99619			ort002225	1063.96	1.76576	1.11807	1.5793	0.114268	0.999594			ort004267	229.072	-2.65647	1.64093	-1.61888	0.105473	0.999868			ort000874	1299.72	2.06884	1.26902	1.63027	0.103045	0.995599			ort010109	2868.39	2.05782	1.24325	1.65519
ort005356	1844.45	-3.83632	2.03659	-1.8837	0.0596054	0.162259			ort001284	40.4775	-4.3501	2.7275	-1.59491	0.110733	0.99619			ort005939	1986.7	1.65851	1.0502	1.57924	0.114282	0.999594			ort003427	45.5202	-4.42621	2.73711	-1.61711	0.105854	NA			ort009969	895.715	2.14056	1.31308	1.63019	0.103062	0.995599			ort005220	128.514	3.18138	1.92263	1.6547
ort005822	928.618	-3.85349	2.04646	-1.883	0.0596998	NA			ort010943	687.266	-1.81831	1.14038	-1.59447	0.11083	0.99619			ort008704	49.3343	4.168	2.63981	1.5789	0.114359	NA			ort009522	2960.09	1.98309	1.22641	1.61698	0.105882	0.999868			ort003180	1716.13	2.02598	1.24387	1.62877	0.103362	0.995599			ort001779	2183.27	2.07881	1.25642	1.65456
ort008312	1303.31	3.85596	2.04883	1.88203	0.0598324	NA			ort000203	44.6505	-4.16028	2.61034	-1.59377	0.110988	0.99619			ort007804	1862.02	-1.66673	1.05569	-1.57881	0.114379	0.999594			ort006463	78.2581	3.60807	2.23164	1.61678	0.105926	NA			ort009225	42.7454	4.75301	2.92051	1.62746	0.10364	NA			ort007223	4815.84	2.02709	1.2253	1.65436
ort010282	1240.42	-3.84117	2.04107	-1.88194	0.0598439	NA			ort005664	211.722	2.36805	1.48658	1.59295	0.111171	0.99619			ort005639	907.983	1.80206	1.14162	1.57851	0.114448	0.999594			ort003266	1265.37	2.07151	1.28129	1.61673	0.105936	0.999868			ort007974	114.723	3.28129	2.01665	1.6271	0.103716	NA			ort006463	77.8832	3.72706	2.25374	1.65372
ort009441	832.252	-3.85427	2.0484	-1.8816	0.0598909	NA			ort006757	230.14	2.31162	1.45135	1.59274	0.111218	0.99619			ort011128	61.6676	-3.83476	2.43029	-1.5779	0.114589	NA			ort006196	476.836	-2.30139	1.42487	-1.61516	0.106276	0.999868			ort007292	537.06	-2.27889	1.40062	-1.62706	0.103724	0.995599			ort006223	3259.24	-2.04628	1.23748	-1.6536
ort001241	941.619	-3.84481	2.04529	-1.87984	0.06013	NA			ort005876	676.444	-1.81799	1.14223	-1.59162	0.111471	0.99619			ort005402	19.4985	-7.5212	4.76986	-1.57682	0.114837	NA			ort007684	2256.92	2.00041	1.23856	1.61511	0.106288	0.999868			ort006908	195.702	2.80781	1.72592	1.62685	0.103769	0.995599			ort008857	287.134	-2.60238	1.57494	-1.65237
ort009630	308.637	-3.92002	2.08577	-1.87941	0.0601879	NA			ort007764	1345.35	-1.66481	1.046	-1.5916	0.111474	0.99619			ort010988	19.4985	-7.5212	4.76986	-1.57682	0.114837	NA			ort006053	251.913	-2.58856	1.60354	-1.61427	0.106468	0.999868			ort003810	79.206	3.71507	2.28485	1.62595	0.103959	NA			ort007119	580.245	-2.3051	1.39837	-1.64842
ort007971	2944.19	-3.81492	2.03122	-1.87815	0.0603608	0.163709			ort001216	1090.44	-1.70206	1.06956	-1.59136	0.111529	0.99619			ort010908	293.854	-2.25928	1.43288	-1.57674	0.114856	0.999594			ort007179	262.339	-2.56454	1.58915	-1.61378	0.106575	0.999868			ort008030	94.0016	3.49822	2.15226	1.62537	0.104084	NA			ort010112	453.935	-2.38443	1.44785	-1.64687
ort010536	21.1871	-5.34786	2.8489	-1.87717	0.0604951	NA			ort009513	705.636	1.80526	1.13462	1.59107	0.111594	0.99619			ort000832	86.2671	3.33066	2.11697	1.57331	0.115647	NA			ort008919	373.059	-2.39251	1.48278	-1.61354	0.106628	0.999868			ort010399	36.3477	5.11557	3.15049	1.62374	0.104432	NA			ort008215	69.0993	-3.88207	2.35769	-1.64656
ort004626	33.6809	-4.77756	2.54639	-1.87621	0.060627	NA			ort001015	551.198	-1.8798	1.18249	-1.5897	0.111903	0.99619			ort001290	782.596	1.83226	1.16474	1.57312	0.115692	0.999594			ort007938	2582.12	-1.98422	1.23046	-1.61259	0.106834	0.999868			ort005830	622.978	-2.22279	1.36916	-1.62347	0.104489	0.995599			ort003269	285.311	-2.59167	1.57405	-1.6465
ort009055	33.6809	-4.77756	2.54639	-1.87621	0.060627	NA			ort010902	238.361	-2.28095	1.43489	-1.58963	0.111918	0.99619			ort007130	4778.6	1.57042	0.998767	1.57236	0.115866	0.999594			ort010889	1770.18	2.01834	1.25199	1.6121	0.106939	0.999868			ort011440	19242.7	1.89706	1.16862	1.62333	0.104519	0.995599			ort008777	54.6937	-4.24328	2.57734	-1.64638
ort011119	33.6809	-4.77756	2.54639	-1.87621	0.060627	NA			ort002554	71.6913	-3.41406	2.14779	-1.58957	0.111932	0.99619			ort002932	52.6524	4.03202	2.56446	1.57227	0.115888	NA			ort009189	745.509	-2.16331	1.3421	-1.61188	0.106988	0.999868			ort007789	699.448	2.18839	1.34825	1.62313	0.104562	0.995599			ort006680	363.011	-2.47288	1.50242	-1.64594
ort003770	23.8644	6.45663	3.44315	1.87521	0.0607634	NA			ort001915	68.5755	-3.47015	2.1844	-1.58861	0.112149	0.99619			ort009231	28.3081	-5.58677	3.5541	-1.57192	0.115969	NA			ort000912	18.7828	-7.65723	4.75162	-1.6115	0.107071	NA			ort009679	41.7226	-4.77306	2.94108	-1.62289	0.104613	NA			ort002934	37.0981	-5.03607	3.05978	-1.64589
ort005655	144.186	-4.03435	2.15196	-1.87473	0.0608296	NA			ort000876	20960.4	1.49907	0.943652	1.58858	0.112156	0.99619			ort010296	226.424	-2.41402	1.53713	-1.57047	0.116306	0.999594			ort006077	18.7828	-7.65723	4.75162	-1.6115	0.107071	NA			ort006148	5866.81	-1.92303	1.1851	-1.62267	0.10466	0.995599			ort004910	398.722	2.42935	1.47681	1.645
ort005850	1561.48	-3.81501	2.03573	-1.87402	0.0609271	0.164638			ort011582	48.2948	-4.00159	2.51952	-1.58823	0.112233	0.99619			ort000752	1026.59	1.75676	1.11917	1.5697	0.116485	0.999594			ort001909	617.385	-2.20949	1.37193	-1.6105	0.107289	0.999868			ort010775	1243.13	-2.06017	1.27003	-1.62215	0.104772	0.995599			ort005678	354.074	-2.48177	1.50872	-1.64495
ort003460	1319.23	-3.81817	2.03784	-1.87364	0.0609802	NA			ort001537	97.5987	3.0413	1.91545	1.58777	0.112339	0.99619			ort008957	1052.31	-1.74987	1.11557	-1.56859	0.116743	0.999594			ort007781	890.852	2.12038	1.31667	1.61042	0.107307	0.999868			ort000260	94.9754	-3.47213	2.14111	-1.62165	0.104879	NA			ort001036	12948.9	1.98103	1.20456	1.64461
ort006248	99.0425	4.4162	2.35804	1.87282	0.0610927	NA			ort002622	148.317	2.63108	1.65716	1.5877	0.112353	0.99619			ort009307	347.421	-2.14559	1.36853	-1.56781	0.116926	0.999594			ort000911	671.021	-2.18619	1.35769	-1.61022	0.107349	0.999868			ort008294	94.9754	-3.47213	2.14111	-1.62165	0.104879	NA			ort009075	1313.5	-2.11914	1.28858	-1.64455
ort002290	654.17	-3.8417	2.0519	-1.87227	0.0611698	NA			ort006311	441.308	-1.95793	1.23395	-1.58672	0.112575	0.99619			ort001804	138.633	-2.80924	1.79256	-1.56717	0.117075	NA			ort007988	1141.01	2.07411	1.28814	1.61016	0.107363	0.999868			ort010943	823.122	-2.14121	1.32107	-1.62081	0.105058	0.995599			ort000762	793.095	2.21171	1.34528	1.64405
ort000510	24.3106	-5.12547	2.73898	-1.87131	0.0613023	NA			ort000736	17.0271	7.45209	4.70096	1.58523	0.112915	0.99619			ort003998	68.6661	3.60952	2.30359	1.56691	0.117136	NA			ort002384	10097.3	-1.91991	1.19267	-1.60976	0.107451	0.999868			ort003413	988.752	2.10025	1.29584	1.62077	0.105068	0.995599			ort009733	18.6523	7.79758	4.74529	1.64322
ort002291	27.434	-4.97347	2.65853	-1.87076	0.0613778	NA			ort001314	17.0271	7.45209	4.70096	1.58523	0.112915	0.99619			ort000387	24.666	5.80537	3.70548	1.5667	0.117185	NA			ort010792	757.935	-2.15355	1.33828	-1.6092	0.107574	0.999868			ort001853	272.794	2.57372	1.58837	1.62035	0.105156	0.995599			ort011190	18.6523	7.79758	4.74529	1.64322
ort011290	27.434	-4.97347	2.65853	-1.87076	0.0613778	NA			ort003077	17.0271	7.45209	4.70096	1.58523	0.112915	0.99619			ort008270	35.918	4.73502	3.0224	1.56665	0.117198	NA			ort009123	82.2008	-3.52375	2.18989	-1.6091	0.107595	NA			ort003961	583.029	-2.2365	1.3805	-1.62006	0.105218	0.995599			ort007237	2534.03	2.04275	1.24348	1.64277
ort011032	158.496	-4.00235	2.13943	-1.87075	0.0613791	NA			ort002022	4067.73	1.54124	0.972464	1.58488	0.112994	0.99619			ort005413	1001.05	-1.7576	1.12196	-1.56654	0.117222	0.999594			ort005089	1944.45	-2.00208	1.24432	-1.60897	0.107623	0.999868			ort001608	277.663	-2.56093	1.58133	-1.61947	0.105345	0.995599			ort000579	206.337	-2.77309	1.68979	-1.64109
ort003627	339.548	3.94669	2.11135	1.86927	0.0615849	NA			ort009896	1332.83	-1.65543	1.04459	-1.58477	0.113018	0.99619			ort001548	101.378	-3.13116	1.9998	-1.56574	0.11741	NA			ort009471	674.01	-2.17934	1.35563	-1.60763	0.107917	0.999868			ort011075	51.8749	-4.33224	2.67584	-1.61902	0.105443	NA			ort008669	1043.64	2.14211	1.30808	1.63759
ort001323	730.486	-3.82749	2.04797	-1.86892	0.0616335	NA			ort007242	3179.62	1.55428	0.981972	1.58281	0.113464	0.99619			ort003719	341.934	-2.14959	1.37292	-1.56571	0.117416	0.999594			ort001026	207.243	-2.68928	1.67314	-1.60732	0.107984	0.999868			ort002538	2804.16	-1.95617	1.20895	-1.61807	0.105647	0.995599			ort010834	543.223	-2.30139	1.40549	-1.63743
ort001473	1165.6	3.8253	2.04749	1.86829	0.0617213	NA			ort007915	634.742	-1.82123	1.15086	-1.5825	0.113536	0.99619			ort009443	315.222	-2.19373	1.40129	-1.56551	0.117463	0.999594			ort006873	301.388	2.47415	1.53966	1.60694	0.108067	0.999868			ort009635	150.768	2.99405	1.85047	1.61799	0.105664	0.995599			ort002372	107.852	-3.3106	2.02192	-1.63736
ort009788	7066.5	-3.78275	2.02473	-1.86828	0.0617234	0.165973			ort005345	46.6295	4.05688	2.56439	1.582	0.113649	0.99619			ort005655	152.783	-2.71496	1.73436	-1.56539	0.117491	NA			ort004375	128.652	3.05236	1.8998	1.60667	0.108126	NA			ort009515	1175.72	2.06142	1.27417	1.61785	0.105694	0.995599			ort006908	252.334	2.63021	1.60834	1.63536
ort003034	708.915	3.85617	2.06406	1.86825	0.0617272	NA			ort004929	31.8005	4.862	3.07372	1.5818	0.113696	0.99619			ort002189	17.3091	7.76249	4.96238	1.56427	0.117755	NA			ort005618	62.8662	-3.86161	2.40451	-1.60599	0.108277	NA			ort006603	438.951	-2.33469	1.44312	-1.61781	0.105704	0.995599			ort010947	1531.2	2.07915	1.27141	1.63531
ort000284	120.322	4.27534	2.28861	1.86809	0.0617493	NA			ort003312	61.8153	-3.59326	2.27171	-1.58174	0.113708	0.99619			ort010532	17.3091	7.76249	4.96238	1.56427	0.117755	NA			ort002562	39.5773	-4.64859	2.89455	-1.60598	0.108278	NA			ort004149	1147.57	-2.06545	1.27674	-1.61775	0.105717	0.995599			ort000382	296.257	-2.54491	1.55636	-1.63517
ort007438	1364.48	-3.80289	2.03579	-1.86802	0.0617593	NA			ort001071	1091.21	-1.68606	1.06604	-1.58161	0.113738	0.99619			ort010808	17.3091	7.76249	4.96238	1.56427	0.117755	NA			ort009901	285.778	2.49712	1.55553	1.60532	0.108423	0.999868			ort003157	14856.1	1.89015	1.16849	1.6176	0.105749	0.995599			ort004538	48.9092	4.35508	2.66422	1.63465
ort007757	637.075	-3.83176	2.05142	-1.86786	0.0617818	NA			ort005158	1488.57	-1.63132	1.03223	-1.58039	0.114017	0.99619			ort007678	631.526	1.88223	1.20328	1.56425	0.117759	0.999594			ort010908	184.909	-2.76095	1.71994	-1.60526	0.108437	0.999868			ort010501	323.219	2.4699	1.52879	1.61559	0.106183	0.995599			ort010799	167.399	-2.90227	1.77754	-1.63274
ort007693	577.684	3.87221	2.0735	1.86748	0.0618351	NA			ort001622	528.497	-1.87784	1.18822	-1.58038	0.114019	0.99619			ort002173	791.689	1.81205	1.15867	1.5639	0.117841	0.999594			ort002634	280.225	-2.50466	1.5614	-1.60412	0.108688	0.999868			ort006496	279.229	2.54858	1.57766	1.61542	0.106221	0.995599			ort002150	559.367	-2.28093	1.39743	-1.63223
ort005452	916.17	-3.81106	2.04204	-1.8663	0.0619989	NA			ort000873	1565.7	1.62298	1.02745	1.57962	0.114193	0.99619			ort008933	470.066	1.99146	1.27389	1.56329	0.117984	0.999594			ort003157	11218.9	1.90666	1.18866	1.60403	0.108707	0.999868			ort007348	19.6271	7.7101	4.77624	1.61426	0.106471	NA			ort004107	44.0648	4.53439	2.77855	1.63193
ort002048	1158.75	-3.80199	2.03763	-1.86588	0.0620576	NA			ort003961	592.622	-1.83708	1.16329	-1.57921	0.114288	0.99619			ort004774	68.8877	-3.61658	2.31381	-1.56304	0.118043	NA			ort009910	92.121	-3.37619	2.10501	-1.60388	0.10874	NA			ort002657	19.361	-7.7447	4.7983	-1.61405	0.106516	NA			ort010339	44.0648	4.53439	2.77855	1.63193
ort001371	67639.6	-3.77153	2.0216	-1.86562	0.0620946	0.165973			ort010049	573.595	1.84729	1.17015	1.57868	0.114409	0.99619			ort004719	671.928	1.85959	1.18974	1.56302	0.118049	0.999594			ort002502	178.954	-2.77874	1.73322	-1.60323	0.108885	0.999868			ort008231	19.361	-7.7447	4.7983	-1.61405	0.106516	NA			ort010069	19.5955	-7.60111	4.65967	-1.63126
ort007008	1788.15	-3.79059	2.03185	-1.86559	0.0620989	0.165973			ort008593	47.7663	-3.98471	2.52433	-1.57852	0.114446	0.99619			ort009681	1483.87	-1.67294	1.07076	-1.56239	0.118196	0.999594			ort003364	1133.94	-2.05858	1.28485	-1.6022	0.109112	0.999868			ort005934	35.8571	5.09539	3.15831	1.61333	0.106673	NA			ort011551	804.784	2.18145	1.33736	1.63116
ort008971	1266.81	-3.79493	2.03576	-1.86413	0.0623029	NA			ort009311	410.812	1.97052	1.24951	1.57704	0.114787	0.99619			ort009072	321.286	-2.1742	1.39248	-1.56138	0.118434	0.999594			ort009728	410.326	-2.32463	1.45176	-1.60125	0.109321	0.999868			ort006033	812.754	2.12798	1.31951	1.61271	0.106809	0.995599			ort003464	82.6348	3.57921	2.19432	1.63112
ort005451	627.874	-3.82185	2.05067	-1.8637	0.0623633	NA			ort003818	1913.94	-1.5919	1.00987	-1.57635	0.114945	0.99619			ort006633	453.473	2.00269	1.28276	1.56124	0.118468	0.999594			ort000262	263.845	-2.52975	1.57987	-1.60124	0.109323	0.999868			ort010713	92.5296	3.47342	2.15539	1.6115	0.10707	NA			ort003992	89.0322	3.4868	2.13945	1.62976
ort010527	23.3566	6.42561	3.44947	1.86278	0.062493	NA			ort000579	186.31	-2.42044	1.53553	-1.57629	0.11496	0.99619			ort011621	8972.03	1.52632	0.977702	1.56113	0.118493	0.999594			ort001246	279.225	2.49722	1.56033	1.60044	0.1095	0.999868			ort010299	182.045	-2.82075	1.75086	-1.61107	0.107165	0.995599			ort011491	3316.89	1.99716	1.22603	1.62897
ort000525	57898.1	-3.76175	2.02056	-1.86174	0.0626401	0.166813			ort008486	41.8441	4.23196	2.68564	1.57578	0.115077	0.99619			ort006457	715.458	-1.83143	1.17552	-1.55798	0.119237	0.999594			ort001896	959.615	-2.08444	1.30247	-1.60038	0.109514	0.999868			ort009440	240.693	2.6224	1.62965	1.60918	0.107577	0.995599			ort003853	243.286	2.63561	1.61807	1.62886
ort005064	193.531	-3.93873	2.11592	-1.86147	0.0626774	NA			ort011480	196.782	2.37986	1.51099	1.57503	0.115249	0.99619			ort005276	1553.75	-1.65799	1.06422	-1.55794	0.119247	0.999594			ort009305	136.204	2.97984	1.86381	1.59879	0.109867	NA			ort000438	314.046	-2.46749	1.53411	-1.60841	0.107744	0.995599			ort006424	1163.21	-2.10461	1.29273	-1.62803
ort000274	277.571	-3.88449	2.08718	-1.86112	0.0627272	NA			ort002463	1294.92	1.64355	1.04406	1.57419	0.115444	0.99619			ort006013	1104.95	1.71943	1.10385	1.55767	0.119311	0.999594			ort004286	104.524	-3.2223	2.0173	-1.59733	0.110192	NA			ort005641	232.295	2.64084	1.64288	1.60744	0.107957	0.995599			ort000993	5542.16	1.97077	1.21054	1.62802
ort002604	65.2539	-4.26988	2.29525	-1.86031	0.0628416	NA			ort005917	882.842	-1.71851	1.09186	-1.57393	0.115504	0.99619			ort009182	12797.9	-1.5104	0.970261	-1.55669	0.119544	0.999594			ort008881	72.706	3.62901	2.27371	1.59607	0.110473	NA			ort003792	7859.01	-1.88526	1.17285	-1.60742	0.107963	0.995599			ort009767	95.7249	-3.41041	2.09495	-1.62792
ort004278	230.043	-3.90593	2.1004	-1.85961	0.0629402	NA			ort001214	1781.46	1.59545	1.01431	1.57295	0.115731	0.99619			ort002465	316.111	2.1652	1.39314	1.55419	0.120139	0.999594			ort009258	32.8528	5.0104	3.1397	1.59583	0.110528	NA			ort002141	28.4781	5.77851	3.59507	1.60734	0.107979	NA			ort006782	63.0823	-3.94734	2.42485	-1.62787
ort009463	13.4631	-6.29536	3.38676	-1.85881	0.0630536	NA			ort003879	616.631	-1.81195	1.15263	-1.572	0.115949	0.99619			ort007786	1022.27	-1.72723	1.11276	-1.55221	0.120612	0.999594			ort005066	163.574	-2.82479	1.77016	-1.59578	0.110538	0.999868			ort008778	1210.12	-2.03404	1.26617	-1.60645	0.108175	0.995599			ort006761	433.513	-2.35775	1.44887	-1.6273
ort011415	13.4631	-6.29536	3.38676	-1.85881	0.0630536	NA			ort003543	4250.44	1.51813	0.966349	1.571	0.116183	0.99619			ort004835	5070.33	-1.53458	0.988922	-1.55178	0.120716	0.999594			ort001678	280.226	2.48342	1.55646	1.59556	0.110588	0.999868			ort003034	25390.7	1.86261	1.15983	1.60594	0.108288	0.995599			ort001145	954.086	-2.13784	1.31384	-1.62716
ort007379	147.648	-3.97964	2.14355	-1.85656	0.0633732	NA			ort004273	576.127	1.83211	1.1663	1.57087	0.116214	0.99619			ort006898	34.518	-4.85358	3.12804	-1.55164	0.120749	NA			ort000745	96.3972	3.29787	2.06759	1.59503	0.110706	NA			ort010093	7418.22	1.87975	1.17231	1.60345	0.108835	0.995599			ort009342	4164.54	1.98106	1.21758	1.62704
ort004993	1815.51	-3.76699	2.02913	-1.85645	0.0633893	0.168199			ort005400	633.022	1.80134	1.14714	1.57029	0.116348	0.99619			ort010318	54.8166	3.88885	2.50662	1.55143	0.120798	NA			ort001890	1061.9	2.05378	1.28797	1.59459	0.110803	0.999868			ort008514	133.5	3.06315	1.91055	1.60328	0.108874	0.995599			ort003134	52928.6	-1.93325	1.18912	-1.62578
ort003499	319.022	-3.85297	2.07685	-1.8552	0.0635677	NA			ort007938	766.359	-1.74658	1.11251	-1.56994	0.116429	0.99619			ort007815	79.2846	-3.38558	2.18251	-1.55123	0.120847	NA			ort003763	21943.4	1.87874	1.17843	1.59427	0.110876	0.999868			ort008110	1461.75	1.99623	1.246	1.60211	0.109131	0.995599			ort007623	53.3266	-4.2048	2.58636	-1.62576
ort011160	388.923	-3.8296	2.066	-1.85364	0.0637912	NA			ort001400	393.396	1.97413	1.25826	1.56894	0.116663	0.99619			ort003842	921.348	-1.74976	1.12806	-1.55112	0.120873	0.999594			ort000753	48.9917	-4.19944	2.63469	-1.5939	0.110958	NA			ort006098	244.165	2.59632	1.62058	1.6021	0.109134	0.995599			ort008681	87.7921	-3.4995	2.15393	-1.6247
ort005171	1874.9	-3.75886	2.02798	-1.8535	0.063811	0.168709			ort009878	564.971	1.83504	1.16967	1.56886	0.116681	0.99619			ort001471	2796.05	1.57453	1.01528	1.55084	0.12094	0.999594			ort007932	269.317	-2.49975	1.56865	-1.59357	0.111033	0.999868			ort003744	295.572	2.48344	1.55097	1.60122	0.109328	0.995599			ort006746	28.8025	-5.68646	3.50089	-1.62429
ort003326	74.7935	-4.18689	2.25901	-1.85342	0.0638218	NA			ort008506	70.1056	-3.37872	2.15397	-1.5686	0.116741	0.99619			ort001426	1078.44	-1.71246	1.10447	-1.55049	0.121024	0.999594			ort003852	795.248	-2.1083	1.32311	-1.59345	0.11106	0.999868			ort010940	3966.92	-1.90046	1.18742	-1.60049	0.109489	0.995599			ort005131	317.6	-2.47993	1.5287	-1.62225
ort011111	479.534	3.85392	2.07961	1.85319	0.0638548	NA			ort011565	370.082	2.00041	1.2755	1.56833	0.116804	0.99619			ort007171	94.347	3.15337	2.03434	1.55007	0.121125	NA			ort006365	15129.9	-1.8808	1.18056	-1.59314	0.111128	0.999868			ort007001	41.2733	4.70054	2.93838	1.5997	0.109664	NA			ort008476	1401.98	-2.06478	1.27282	-1.62221
ort003386	54.2372	-4.34788	2.34627	-1.85311	0.0638671	NA			ort004879	373.977	1.9937	1.27205	1.56732	0.117041	0.99619			ort009714	113.392	2.94918	1.90412	1.54884	0.12142	NA			ort008116	657.239	2.15364	1.35194	1.593	0.111159	0.999868			ort008970	543.004	-2.21602	1.38571	-1.59919	0.109778	0.995599			ort011668	395.393	-2.38216	1.46864	-1.62202
ort005202	109.659	-4.04532	2.18392	-1.85232	0.0639793	NA			ort003704	53.8353	3.76022	2.4009	1.56617	0.117309	0.99619			ort000779	751.002	1.79851	1.16155	1.54837	0.121532	0.999594			ort001074	1717.12	-1.98147	1.24443	-1.59227	0.111324	0.999868			ort000772	19.1364	7.67358	4.80555	1.59682	0.110307	NA			ort006221	444.458	-2.33515	1.44028	-1.62131
ort003581	327.085	-3.8417	2.07447	-1.85189	0.0640413	NA			ort006456	5697.2	1.49681	0.955796	1.56603	0.117341	0.99619			ort005375	86.0714	-3.27134	2.11328	-1.54799	0.121625	NA			ort005458	44.0374	-4.37617	2.74963	-1.59155	0.111487	NA			ort000915	19.1364	7.67358	4.80555	1.59682	0.110307	NA			ort003582	35.731	-4.98022	3.07909	-1.61743
ort004316	7260.71	-3.73431	2.01936	-1.84925	0.0644212	0.169709			ort007009	662.701	-1.77987	1.13659	-1.56597	0.117356	0.99619			ort007803	50.5477	-4.04625	2.61497	-1.54734	0.121781	NA			ort009922	313.446	2.41722	1.51911	1.59121	0.111563	0.999868			ort000597	1234.28	-2.0111	1.25982	-1.59633	0.110415	0.995599			ort008022	713.769	2.18097	1.34842	1.61742
ort010932	84.3331	-4.12549	2.23116	-1.84903	0.0644532	NA			ort008406	16.5541	7.41145	4.7351	1.56522	0.117532	0.99619			ort011061	3178.29	1.55654	1.00641	1.54663	0.121951	0.999594			ort003528	283.72	-2.46536	1.54992	-1.59064	0.11169	0.999868			ort007764	2067.48	-1.94227	1.21699	-1.59597	0.110496	0.995599			ort000689	1344.24	2.05866	1.27362	1.61638
ort001151	335.147	-3.83105	2.07222	-1.84876	0.0644918	NA			ort011488	4861.28	1.50188	0.959879	1.56465	0.117664	0.99619			ort005450	580.739	1.87576	1.21356	1.54566	0.122186	0.999594			ort005348	358.702	-2.35439	1.48044	-1.59033	0.111761	0.999868			ort005881	18.8515	-7.70623	4.82946	-1.59567	0.110563	NA			ort005579	19.1397	-7.56716	4.68503	-1.61518
ort004416	312.945	-3.83599	2.07587	-1.84789	0.0646176	NA			ort001026	312.724	-2.0725	1.32539	-1.56369	0.117891	0.99619			ort005368	490.269	1.93937	1.2548	1.54556	0.12221	0.999594			ort002060	361.265	2.34787	1.47764	1.58893	0.112076	0.999868			ort006463	76.262	3.65617	2.29464	1.59336	0.111081	NA			ort009810	19.1397	-7.56716	4.68503	-1.61518
ort003935	8496.59	-3.72959	2.01854	-1.84766	0.0646509	0.169709			ort004235	1622.21	1.59316	1.0189	1.5636	0.117911	0.99619			ort001264	102.389	-3.06002	1.98013	-1.54536	0.12226	NA			ort007003	57.4176	-3.92762	2.47276	-1.58836	0.112206	NA			ort008911	832.539	-2.08295	1.3074	-1.5932	0.111115	0.995599			ort011061	3182.9	1.97292	1.2215	1.61517
ort002332	22.6796	6.38317	3.45838	1.84571	0.0649342	NA			ort007305	2265.45	-1.55371	0.993907	-1.56324	0.117997	0.99619			ort001913	71.1979	-3.50331	2.26983	-1.54343	0.122727	NA			ort005236	26.2086	-5.66717	3.56802	-1.58832	0.112213	NA			ort003543	7958.07	1.85807	1.16668	1.59261	0.111248	0.995599			ort006998	182.539	-2.79124	1.72832	-1.615
ort002073	535.479	-3.78491	2.05069	-1.84568	0.0649393	NA			ort000950	16578.4	1.46483	0.937278	1.56286	0.118086	0.99619			ort003407	1223.85	1.67385	1.08459	1.54329	0.122759	0.999594			ort005760	1364.83	2.0008	1.26	1.58793	0.112302	0.999868			ort009528	606.636	2.16571	1.36023	1.59217	0.111347	0.995599			ort003840	873.29	-2.13023	1.31926	-1.61471
ort007521	1266.57	-3.74615	2.03041	-1.84502	0.0650348	NA			ort000522	15.8571	-7.5097	4.80606	-1.56255	0.118159	0.99619			ort004889	1079.99	1.69872	1.10085	1.54311	0.122805	0.999594			ort009898	893.761	2.069	1.30404	1.5866	0.112603	0.999868			ort009188	1055.77	2.02816	1.27493	1.59079	0.111656	0.995599			ort002273	38.1231	4.74873	2.94118	1.61456
ort007575	52.4216	5.10806	2.7714	1.84313	0.0653097	NA			ort010441	1138.9	-1.64628	1.05403	-1.5619	0.118312	0.99619			ort008983	54.2396	3.87255	2.5107	1.54242	0.122972	NA			ort009685	95.3857	3.28109	2.0687	1.58607	0.112724	NA			ort005971	40.7826	4.68262	2.9446	1.59024	0.11178	NA			ort009690	2328.52	-1.99341	1.23518	-1.61386
ort008200	699.467	-3.76038	2.0415	-1.84197	0.0654797	NA			ort008828	370.729	-1.98582	1.27177	-1.56146	0.118415	0.99619			ort005348	317.964	-2.13843	1.38686	-1.54192	0.123093	0.999594			ort001500	68.1655	3.67701	2.31857	1.5859	0.112763	NA			ort004854	2205.31	-1.9247	1.2105	-1.59001	0.111833	0.995599			ort010954	84.1877	3.50029	2.16953	1.61339
ort005635	747.165	-3.75715	2.03979	-1.84193	0.0654855	NA			ort011452	226.371	-2.25288	1.44338	-1.56084	0.11856	0.99619			ort006194	74.8079	-3.43119	2.22558	-1.54171	0.123145	NA			ort006223	4028.97	-1.90254	1.1999	-1.58558	0.112834	0.999868			ort010035	166.111	2.83808	1.78512	1.58985	0.111868	0.995599			ort008141	269.632	-2.54256	1.57605	-1.61325
ort000589	766.245	-3.75597	2.03917	-1.84192	0.0654876	NA			ort011208	375.98	1.97809	1.26774	1.56032	0.118684	0.99619			ort010731	39.2362	4.43547	2.87818	1.54107	0.1233	NA			ort009928	75.2234	3.54623	2.23846	1.58423	0.113142	NA			ort009352	763.283	-2.09528	1.31863	-1.58898	0.112065	0.995599			ort001069	734.481	-2.16575	1.34261	-1.61308
ort004266	55.8835	-4.29541	2.33281	-1.84131	0.0655769	NA			ort010318	57.2017	3.64701	2.33746	1.56024	0.118702	0.99619			ort003562	14534.9	-1.48318	0.962582	-1.54083	0.123357	0.999594			ort001852	1601.32	1.97215	1.24516	1.58386	0.113226	0.999868			ort007783	750.59	2.0977	1.32097	1.588	0.112286	0.995599			ort006889	197.13	-2.73235	1.694	-1.61296
ort011252	47.9903	-4.37924	2.38179	-1.83864	0.0659683	NA			ort009440	151.795	2.54538	1.63163	1.56003	0.118754	0.99619			ort010120	2098.41	1.58769	1.03051	1.54069	0.123393	0.999594			ort001387	6154.14	1.88205	1.18827	1.58386	0.113226	0.999868			ort011343	651.096	-2.13554	1.34501	-1.58775	0.112343	0.995599			ort007785	2508.76	1.98537	1.23089	1.61295
ort007266	29.0804	-4.78844	2.60736	-1.83651	0.0662818	NA			ort002277	651.295	-1.77125	1.13692	-1.55794	0.119247	0.99619			ort009636	50.1144	-4.03308	2.61857	-1.54018	0.123516	NA			ort007055	1165.84	-2.0157	1.27271	-1.58379	0.113242	0.999868			ort001395	3129.06	1.8913	1.1914	1.58745	0.11241	0.995599			ort009215	4244.42	-1.95195	1.21065	-1.61232
ort008934	918.909	3.75141	2.0441	1.83524	0.0664701	NA			ort001189	852.268	-1.70036	1.09143	-1.55792	0.119252	0.99619			ort001034	314.787	-2.1381	1.38913	-1.53916	0.123765	0.999594			ort007897	359.242	2.33817	1.47637	1.58373	0.113255	0.999868			ort011361	195.669	-2.70575	1.70514	-1.58682	0.112553	0.995599			ort008819	579.166	-2.22524	1.38118	-1.61111
ort010268	805.08	-3.7363	2.03606	-1.83506	0.0664971	NA			ort009057	131.616	-2.66058	1.70788	-1.55783	0.119274	0.99619			ort010085	1518.93	1.62781	1.05824	1.53823	0.123993	0.999594			ort005042	110.502	3.12431	1.97316	1.5834	0.11333	NA			ort006591	112.779	3.17974	2.0042	1.58654	0.112618	NA			ort005348	390.836	-2.36221	1.46629	-1.61101
ort000088	440.76	-3.7687	2.05458	-1.83429	0.0666108	NA			ort007480	139.22	2.61321	1.67769	1.55763	0.119322	0.99619			ort004935	843.928	1.74727	1.13633	1.53765	0.124134	0.999594			ort002204	2547.41	1.92548	1.21651	1.5828	0.113467	0.999868			ort002680	106.363	3.23847	2.04222	1.58576	0.112795	NA			ort011432	11214.2	-1.91943	1.1916	-1.61079
ort001328	2524.24	-3.70229	2.01971	-1.83308	0.0667906	0.174702			ort011516	668.716	1.7625	1.13193	1.55707	0.119453	0.99619			ort005930	3270.21	1.53926	1.00135	1.53718	0.124248	0.999594			ort010333	177.483	-2.72865	1.72432	-1.58245	0.113547	0.999868			ort001820	919.775	2.04564	1.29006	1.58569	0.11281	0.995599			ort003364	1625.17	-2.02287	1.25609	-1.61045
ort001882	16.5866	-5.58489	3.0496	-1.83135	0.0670477	NA			ort006251	551.282	-1.82181	1.17015	-1.55691	0.119493	0.99619			ort003570	236.61	2.3032	1.49842	1.53708	0.124273	0.999594			ort007690	334.574	2.36555	1.49518	1.58212	0.113621	0.999868			ort008531	2815.96	1.89523	1.19541	1.58542	0.11287	0.995599			ort000715	160.015	-2.87452	1.78619	-1.6093
ort002942	16.5866	-5.58489	3.0496	-1.83135	0.0670477	NA			ort001987	76.9272	3.23198	2.07598	1.55684	0.119508	0.99619			ort009025	897.088	-1.73073	1.12632	-1.53662	0.124387	0.999594			ort007309	42.9454	4.37299	2.76526	1.5814	0.113786	NA			ort007733	226.897	2.60141	1.64127	1.58499	0.112968	0.995599			ort008110	1412.21	2.0375	1.26625	1.60908
ort003910	16.5866	-5.58489	3.0496	-1.83135	0.0670477	NA			ort003261	1134.14	-1.63831	1.05263	-1.5564	0.119613	0.99619			ort011111	1784.43	1.601	1.04214	1.53627	0.124472	0.999594			ort008112	5297.51	1.87897	1.18957	1.57953	0.114214	0.999868			ort005305	27.4967	5.72697	3.61904	1.58246	0.113545	NA			ort001419	746.11	2.15036	1.33744	1.60782
ort005594	16.5866	-5.58489	3.0496	-1.83135	0.0670477	NA			ort004859	2190.46	1.54629	0.993754	1.55601	0.119705	0.99619			ort007303	599.658	-1.8475	1.20288	-1.5359	0.124564	0.999594			ort001034	284.731	-2.4322	1.54164	-1.57767	0.114642	0.999868			ort008100	27.4967	5.72697	3.61904	1.58246	0.113545	NA			ort003124	485.516	2.26961	1.413	1.60623
ort005145	1404.14	-3.70719	2.02473	-1.83095	0.0671073	NA			ort001507	3917.44	1.49989	0.964284	1.55544	0.119841	0.99619			ort001165	136.044	2.73506	1.7811	1.5356	0.124637	NA			ort005876	534.047	-2.17892	1.38145	-1.57728	0.114732	0.999868			ort003812	5663.33	-1.851	1.16972	-1.58243	0.113551	0.995599			ort001219	1858.92	-1.99919	1.24489	-1.60592
ort005088	44.8668	-4.39851	2.40311	-1.83034	0.0671994	NA			ort001911	197.839	2.33256	1.4998	1.55525	0.119887	0.99619			ort008110	1803.33	1.59694	1.04058	1.53466	0.124866	0.999594			ort008446	17.7943	-7.57923	4.80954	-1.57588	0.115055	NA			ort008850	75.2806	3.636	2.29817	1.58212	0.113621	NA			ort006687	275.835	-2.51196	1.56461	-1.60549
ort010472	3574.82	-3.68878	2.01624	-1.82953	0.0673204	0.175083			ort001561	201.138	-2.31891	1.49125	-1.55501	0.119943	0.99619			ort008524	46154.4	1.46103	0.952051	1.53461	0.124879	0.999594			ort007171	143.745	2.86967	1.82119	1.57571	0.115092	NA			ort006502	55.0687	4.08863	2.58632	1.58087	0.113908	NA			ort009106	3691.64	1.94517	1.21189	1.60508
ort008119	3918.13	-3.68316	2.01525	-1.82764	0.0676035	0.175083			ort002760	1454.38	-1.59433	1.02561	-1.55452	0.120061	0.99619			ort008813	8175.67	-1.48382	0.968567	-1.53198	0.125528	0.999594			ort001320	25.7143	-5.63915	3.57936	-1.57546	0.11515	NA			ort007134	55.0687	4.08863	2.58632	1.58087	0.113908	NA			ort008720	25.6912	5.79112	3.60935	1.60448
ort010952	2073.77	-3.69011	2.01941	-1.82732	0.0676513	0.175083			ort000260	103.211	-2.88613	1.85677	-1.55438	0.120094	0.99619			ort008665	139.353	-2.71097	1.7696	-1.53197	0.125531	NA			ort006118	148.699	-2.84128	1.80397	-1.57501	0.115253	NA			ort005969	256.848	-2.51372	1.5905	-1.58046	0.114001	0.995599			ort002493	1314.07	2.03692	1.27011	1.60373
ort010238	297.835	-3.78527	2.07236	-1.82655	0.067768	NA			ort005243	1087.96	-1.64261	1.05687	-1.55422	0.120133	0.99619			ort010063	1813.19	-1.59146	1.03912	-1.53154	0.125636	0.999594			ort001220	125.87	-2.97963	1.89223	-1.57466	0.115334	NA			ort005886	452.463	-2.24105	1.41828	-1.58011	0.114081	0.995599			ort000968	440.999	-2.29594	1.43304	-1.60215
ort002102	1186.71	-3.69986	2.02585	-1.82632	0.0678021	NA			ort000744	578.935	-1.80058	1.15872	-1.55394	0.120199	0.99619			ort003057	626.224	-1.82427	1.19137	-1.53123	0.125712	0.999594			ort006552	3749.98	1.88434	1.19692	1.57433	0.115412	0.999868			ort001195	18.6457	7.6361	4.83616	1.57896	0.114345	NA			ort010820	27.8911	-5.63916	3.52058	-1.60177
ort000955	465.117	-3.74282	2.04995	-1.82581	0.0678793	NA			ort003936	289.567	2.09343	1.3478	1.55322	0.12037	0.99619			ort010954	82.2283	3.25443	2.12723	1.52989	0.126044	NA			ort007530	1725.75	-1.94101	1.23435	-1.5725	0.115835	0.999868			ort008884	3294.53	1.87131	1.18557	1.57841	0.114472	0.995599			ort003218	17.5551	7.71012	4.81371	1.6017
ort000430	22.8335	-5.03236	2.75758	-1.82492	0.0680128	NA			ort005871	854.215	-1.69136	1.08926	-1.55276	0.120481	0.99619			ort006311	406.471	-1.98593	1.30004	-1.5276	0.126612	0.999594			ort005720	684.344	2.0991	1.33497	1.57239	0.115861	0.999868			ort004462	2069.07	1.90891	1.20953	1.57823	0.114513	0.995599			ort005687	17.5551	7.71012	4.81371	1.6017
ort007080	22.8335	-5.03236	2.75758	-1.82492	0.0680128	NA			ort003333	1024.47	1.65142	1.0639	1.55224	0.120605	0.99619			ort001284	26.5749	-5.49366	3.59643	-1.52753	0.126629	NA			ort000309	37.3933	4.59792	2.92519	1.57184	0.115988	NA			ort008017	143.549	-2.92683	1.85479	-1.57798	0.114571	0.995599			ort005901	17.5551	7.71012	4.81371	1.6017
ort010856	22.8335	-5.03236	2.75758	-1.82492	0.0680128	NA			ort007055	904.931	-1.67616	1.08035	-1.5515	0.120783	0.99619			ort010171	26.5749	-5.49366	3.59643	-1.52753	0.126629	NA			ort010689	37.3933	4.59792	2.92519	1.57184	0.115988	NA			ort000590	3548.35	1.8651	1.18215	1.57771	0.114632	0.995599			ort007334	17.5551	7.71012	4.81371	1.6017
ort006656	2077.74	-3.68254	2.01855	-1.82434	0.0681002	0.175627			ort009522	4458.76	1.48444	0.95786	1.54974	0.121203	0.99619			ort001145	978.805	-1.69178	1.10851	-1.52618	0.126965	0.999594			ort002354	25.2775	5.64781	3.59453	1.57122	0.116131	NA			ort001973	69.6133	-3.72103	2.35946	-1.57707	0.114779	NA			ort010133	4037.37	1.93168	1.20703	1.60035
ort001129	19.71	-5.24094	2.8739	-1.82363	0.0682077	NA			ort010587	79.3477	3.17118	2.04715	1.54907	0.121364	0.99619			ort002706	29.1381	5.02779	3.29493	1.52592	0.12703	NA			ort009937	25.2775	5.64781	3.59453	1.57122	0.116131	NA			ort007009	819.292	-2.0543	1.30266	-1.577	0.114796	0.995599			ort004996	743.73	2.13299	1.33396	1.59899
ort010339	21.8334	6.32831	3.47037	1.82353	0.0682237	NA			ort003995	819.802	-1.69504	1.09425	-1.54905	0.121371	0.99619			ort009713	1186.28	-1.64935	1.08153	-1.52502	0.127255	0.999594			ort011013	6377.12	1.8544	1.18112	1.57003	0.116407	0.999868			ort001191	1428.08	-1.95118	1.23739	-1.57686	0.114829	0.995599			ort004823	18.684	-7.5324	4.71144	-1.59875
ort008212	435.021	-3.73971	2.05179	-1.82265	0.0683557	NA			ort011007	28.9601	-4.88818	3.15579	-1.54896	0.121392	0.99619			ort001506	2805.6	1.53168	1.00481	1.52434	0.127424	0.999594			ort005613	1414.3	-1.95923	1.24819	-1.56966	0.116494	0.999868			ort003294	18.342	-7.6667	4.86209	-1.57683	0.114834	NA			ort011414	18.684	-7.5324	4.71144	-1.59875
ort003396	455.746	-3.73581	2.04982	-1.8225	0.0683785	NA			ort011334	575.932	1.7931	1.15805	1.54838	0.12153	0.99619			ort005482	44.3379	-4.18673	2.74763	-1.52376	0.127569	NA			ort007273	437.213	-2.22866	1.42	-1.56948	0.116535	0.999868			ort003730	18.342	-7.6667	4.86209	-1.57683	0.114834	NA			ort006041	2459.95	1.95961	1.22578	1.59866
ort006221	505.26	-3.72413	2.04536	-1.82077	0.0686416	NA			ort006128	400.88	1.92606	1.24466	1.54746	0.121754	0.99619			ort009192	976.639	-1.6876	1.10774	-1.52346	0.127643	0.999594			ort010147	353.679	2.31116	1.47265	1.56939	0.116557	0.999868			ort011642	237.786	2.55172	1.61845	1.57665	0.114877	0.995599			ort010035	139.384	2.95213	1.84685	1.59847
ort009380	522.862	-3.71925	2.04384	-1.81974	0.0687982	NA			ort001191	1046.79	-1.63865	1.0592	-1.54706	0.12185	0.99619			ort001391	746.535	1.75398	1.15188	1.5227	0.127833	0.999594			ort003057	515.195	-2.17184	1.3843	-1.56891	0.11667	0.999868			ort004704	4782.01	-1.8468	1.1716	-1.5763	0.114956	0.995599			ort008083	154.909	-2.86888	1.79578	-1.59757
ort002222	21.6641	6.31708	3.47289	1.81897	0.0689158	NA			ort002003	2949.43	1.50472	0.973454	1.54576	0.122163	0.99619			ort003014	632.142	-1.80333	1.18521	-1.52152	0.128129	0.999594			ort009241	166.402	2.73361	1.74446	1.56702	0.117109	0.999868			ort009732	76.7087	-3.58825	2.27691	-1.57593	0.115041	NA			ort010211	907.958	-2.08321	1.30577	-1.59539
ort002712	199.316	-3.81737	2.09999	-1.81781	0.0690936	NA			ort011123	1146.16	-1.61953	1.04774	-1.54574	0.122166	0.99619			ort009508	1628.02	1.58971	1.04483	1.5215	0.128134	0.999594			ort000166	4608.25	1.85689	1.18642	1.56512	0.117555	0.999868			ort007179	373.602	-2.30696	1.46566	-1.57401	0.115485	0.995599			ort002690	300.46	-2.44449	1.53231	-1.5953
ort001849	1074.9	-3.67875	2.02481	-1.81684	0.0692417	NA			ort004311	619.831	-1.76452	1.14184	-1.54533	0.122266	0.99619			ort005886	351.604	-2.04298	1.34277	-1.52147	0.128142	0.999594			ort001186	606.109	-2.11304	1.35112	-1.56392	0.117837	0.999868			ort000424	354.901	-2.3298	1.48033	-1.57384	0.115524	0.995599			ort010943	866.37	-2.09225	1.31161	-1.59518
ort009696	46.5132	-4.33194	2.38509	-1.81626	0.069331	NA			ort011013	4111.08	1.48235	0.959255	1.54531	0.122271	0.99619			ort008878	38.9946	-4.42811	2.91061	-1.52137	0.128167	NA			ort002623	189.415	-2.63269	1.6846	-1.5628	0.118099	0.999868			ort009135	5311.81	1.83698	1.16756	1.57335	0.115639	0.995599			ort008299	789.87	2.10997	1.32331	1.59447
ort005250	1824.82	-3.66274	2.01734	-1.81563	0.0694277	0.178424			ort003945	2702	-1.51075	0.977718	-1.54517	0.122304	0.99619			ort007995	1190.81	1.64169	1.07918	1.52123	0.128201	0.999594			ort008170	297.169	-2.37424	1.51963	-1.56239	0.118197	0.999868			ort005665	39.8013	4.6461	2.95743	1.57099	0.116185	NA			ort009707	3119.08	1.9336	1.21324	1.59375
ort007063	110.505	4.14592	2.28441	1.81488	0.0695428	NA			ort000166	2255.76	1.52592	0.988047	1.54438	0.122497	0.99619			ort010683	736.963	-1.75459	1.15397	-1.52048	0.128391	0.999594			ort011233	574.325	-2.12307	1.35945	-1.56171	0.118355	0.999868			ort008371	39.8013	4.6461	2.95743	1.57099	0.116185	NA			ort005302	631.523	-2.16404	1.35794	-1.59362
ort007872	354.103	-3.73657	2.05914	-1.81463	0.0695814	NA			ort011348	608.093	1.76887	1.14548	1.54422	0.122535	0.99619			ort005022	164.622	-2.53438	1.66788	-1.51953	0.12863	NA			ort009604	31.6572	-4.92095	3.1533	-1.56057	0.118625	NA			ort008934	7927.77	1.81906	1.15797	1.5709	0.116206	0.995599			ort003763	23222.6	1.87731	1.1784	1.59311
ort011208	741.811	-3.6859	2.03179	-1.81412	0.06966	NA			ort007206	432.04	1.88658	1.22287	1.54274	0.122894	0.99619			ort005901	45.8724	4.05697	2.67163	1.51854	0.128879	NA			ort004444	1482.43	-1.93382	1.23969	-1.55992	0.118778	0.999868			ort011559	3354.1	1.85589	1.18158	1.57068	0.116257	0.995599			ort002869	512.504	-2.2209	1.39564	-1.59131
ort004175	346.21	-3.73381	2.05977	-1.81273	0.0698739	NA			ort004471	1375.09	-1.58451	1.02708	-1.54273	0.122897	0.99619			ort003067	237.91	2.2569	1.48668	1.51808	0.128993	0.999594			ort005807	442.742	2.20109	1.41154	1.55936	0.118912	0.999868			ort002549	963.916	2.00658	1.27756	1.57063	0.116268	0.995599			ort010686	95.3621	-3.30219	2.07518	-1.59128
ort007253	60.8226	-4.16297	2.29784	-1.81169	0.0700342	NA			ort002615	62.2883	-3.45575	2.24073	-1.54225	0.123014	0.99619			ort007461	65.4213	-3.53585	2.32924	-1.51803	0.129007	NA			ort001484	2242.17	1.88971	1.21193	1.55925	0.118937	0.999868			ort003936	373.776	2.29756	1.46373	1.56966	0.116494	0.995599			ort006916	569.689	-2.18687	1.37485	-1.59062
ort008089	38.62	-4.44741	2.45598	-1.81085	0.0701634	NA			ort009550	56.0566	-3.60508	2.33786	-1.54204	0.123064	0.99619			ort003279	16.1551	7.66294	5.04984	1.51746	0.12915	NA			ort009854	17.1965	7.56311	4.85156	1.5589	0.11902	NA			ort008889	709.147	2.07482	1.32222	1.5692	0.116602	0.995599			ort002791	631.616	-2.15591	1.35615	-1.58973
ort007193	21153.7	-3.63309	2.00662	-1.81055	0.0702105	0.179807			ort009192	521.347	-1.81455	1.17684	-1.54189	0.123101	0.99619			ort007074	16.1551	7.66294	5.04984	1.51746	0.12915	NA			ort005498	327.47	-2.32045	1.4887	-1.55871	0.119065	0.999868			ort002836	2924.76	-1.86053	1.18648	-1.56811	0.116856	0.995599			ort004998	928.576	-2.0622	1.29936	-1.58709
ort000436	30.7267	-4.64005	2.56449	-1.80935	0.0703973	NA			ort011230	1809.48	-1.54587	1.00262	-1.54183	0.123116	0.99619			ort005131	256.597	-2.21085	1.45696	-1.51744	0.129156	0.999594			ort008524	30681	1.80826	1.1601	1.5587	0.119067	0.999868			ort004853	26.4752	-5.72663	3.65271	-1.56777	0.116934	NA			ort010578	1017.5	-2.04388	1.2884	-1.58638
ort000613	7.38549	-7.88997	4.36085	-1.80927	0.0704084	NA			ort006148	3697.52	-1.48281	0.961984	-1.54141	0.123217	0.99619			ort004055	89.8251	-3.126	2.06012	-1.51739	0.129169	NA			ort010795	167.08	-2.70214	1.73653	-1.55606	0.119695	0.999868			ort009471	483.241	-2.19032	1.39718	-1.56767	0.116958	0.995599			ort002537	1424.52	1.99191	1.2557	1.58629
ort000659	7.38549	-7.88997	4.36085	-1.80927	0.0704084	NA			ort011519	341.147	1.98723	1.28928	1.54135	0.123233	0.99619			ort000748	669.392	-1.77744	1.17148	-1.51726	0.129201	0.999594			ort007717	42.0602	-4.30663	2.76769	-1.55604	0.119699	NA			ort010851	892.203	2.01668	1.28654	1.56752	0.116994	0.995599			ort009433	261.429	-2.4902	1.57187	-1.58423
ort000919	7.38549	-7.88997	4.36085	-1.80927	0.0704084	NA			ort007752	815.947	1.68088	1.09183	1.53951	0.123679	0.99619			ort004643	120.293	-2.81122	1.85287	-1.51723	0.129209	NA			ort002879	287.743	-2.37399	1.52609	-1.5556	0.119803	0.999868			ort007752	721.527	2.06604	1.31842	1.56706	0.117102	0.995599			ort006190	1074.39	2.02896	1.28105	1.58383
ort001097	7.38549	-7.88997	4.36085	-1.80927	0.0704084	NA			ort010742	75.5083	3.20223	2.08078	1.53896	0.123815	0.99619			ort011033	1341.46	1.61238	1.06313	1.51664	0.129358	0.999594			ort003944	69.1655	3.55101	2.28388	1.55482	0.11999	NA			ort007689	365.378	2.30062	1.4687	1.56643	0.117247	0.995599			ort005254	327.16	2.37544	1.49991	1.58372
ort001481	7.38549	-7.88997	4.36085	-1.80927	0.0704084	NA			ort008725	1000.43	1.63491	1.06239	1.5389	0.123829	0.99619			ort007313	4528.18	1.48552	0.979512	1.51659	0.12937	0.999594			ort006141	2525.78	-1.86949	1.20311	-1.55389	0.120211	0.999868			ort003364	1715.9	-1.9074	1.21779	-1.56628	0.117283	0.995599			ort000744	127.735	-2.9919	1.8897	-1.58327
ort003156	7.38549	-7.88997	4.36085	-1.80927	0.0704084	NA			ort004006	15.3285	-7.46078	4.84847	-1.53879	0.123855	0.99619			ort003313	411.378	-1.95737	1.2912	-1.51593	0.129538	0.999594			ort004910	300.802	2.34642	1.51078	1.55311	0.120396	0.999868			ort007834	523.656	2.15929	1.37875	1.56612	0.11732	0.995599			ort001821	4512.64	-1.89398	1.19657	-1.58284
ort003686	7.38549	-7.88997	4.36085	-1.80927	0.0704084	NA			ort006853	15.3285	-7.46078	4.84847	-1.53879	0.123855	0.99619			ort010399	22.9351	5.69845	3.75988	1.5156	0.129622	NA			ort002157	96.1097	-3.17009	2.04223	-1.55227	0.120598	NA			ort003942	2602.92	-1.86436	1.19106	-1.56529	0.117514	0.995599			ort002987	462.939	2.23485	1.41208	1.58266
ort003901	7.38549	-7.88997	4.36085	-1.80927	0.0704084	NA			ort001445	519.762	-1.8089	1.1761	-1.53805	0.124036	0.99619			ort010134	2185.86	1.53983	1.01716	1.51384	0.130065	0.999594			ort009435	1282.79	-1.93423	1.24739	-1.55062	0.120992	0.999868			ort009930	91.0764	3.34656	2.13871	1.56476	0.117639	NA			ort004643	104.755	-3.1779	2.00808	-1.58256
ort005691	7.38549	-7.88997	4.36085	-1.80927	0.0704084	NA			ort010696	1118.28	-1.61141	1.04791	-1.53773	0.124114	0.99619			ort007739	64.6274	3.51466	2.32189	1.51371	0.1301	NA			ort007375	1604.06	1.90476	1.22876	1.55015	0.121105	0.999868			ort010382	1077.35	-1.97193	1.26102	-1.56376	0.117873	0.995599			ort006277	18.2283	-7.49677	4.73896	-1.58194
ort008269	7.38549	-7.88997	4.36085	-1.80927	0.0704084	NA			ort010113	7670.43	1.44411	0.93971	1.53676	0.124352	0.99619			ort001850	4275.39	1.48136	0.979901	1.51174	0.1306	0.999594			ort009215	7105.04	-1.81312	1.1697	-1.55007	0.121125	0.999868			ort006619	167.816	-2.75976	1.76544	-1.56322	0.118001	0.995599			ort000079	1126.95	-2.01694	1.27536	-1.58147
ort008361	7.38549	-7.88997	4.36085	-1.80927	0.0704084	NA			ort009142	8619.55	1.44032	0.937444	1.53643	0.124432	0.99619			ort000248	393.454	1.96656	1.30124	1.5113	0.130712	0.999594			ort011467	1497.39	1.91197	1.23379	1.54967	0.121221	0.999868			ort010820	38.6656	-4.65911	2.98128	-1.56279	0.118102	NA			ort009728	346.885	-2.34479	1.48323	-1.58087
ort009010	7.38549	-7.88997	4.36085	-1.80927	0.0704084	NA			ort005663	1530.26	1.55528	1.01406	1.53372	0.125099	0.99619			ort009671	5760.75	1.46463	0.969448	1.51079	0.130842	0.999594			ort001284	24.7258	-5.58144	3.60324	-1.54901	0.12138	NA			ort008206	84.1693	3.43295	2.19676	1.56273	0.118115	NA			ort004423	886.623	2.05684	1.30167	1.58016
ort009099	7.38549	-7.88997	4.36085	-1.80927	0.0704084	NA			ort006145	371.834	1.93294	1.26047	1.53351	0.12515	0.99619			ort001523	45.2955	4.0376	2.67715	1.50817	0.131511	NA			ort001251	271.098	2.38752	1.54153	1.5488	0.121429	0.999868			ort009878	460.851	2.19643	1.406	1.56218	0.118245	0.995599			ort001387	9246.91	1.86652	1.18126	1.58012
ort010916	7.38549	-7.88997	4.36085	-1.80927	0.0704084	NA			ort010040	1483.05	1.55888	1.01675	1.53319	0.125229	0.99619			ort011627	382.2	1.97371	1.30869	1.50816	0.131514	0.999594			ort004976	108.973	3.03317	1.95928	1.5481	0.121597	NA			ort001920	325.047	-2.3441	1.50119	-1.5615	0.118406	0.995599			ort000635	17.0065	7.66431	4.85069	1.58004
ort011523	7.38549	-7.88997	4.36085	-1.80927	0.0704084	NA			ort006043	3162.54	1.48111	0.966073	1.53313	0.125244	0.99619			ort002133	218.045	-2.29421	1.52208	-1.50729	0.131737	0.999594			ort001990	239.085	-2.45295	1.58467	-1.54792	0.121641	0.999868			ort011233	947.991	-1.98789	1.2749	-1.55925	0.118937	0.995599			ort001590	17.0065	7.66431	4.85069	1.58004
ort010438	148.494	-3.84719	2.1279	-1.80798	0.0706098	NA			ort011467	1305.35	1.57687	1.02902	1.5324	0.125425	0.99619			ort003396	567.744	-1.81303	1.20295	-1.50715	0.131773	0.999594			ort002932	57.5671	3.76108	2.43429	1.54504	0.122336	NA			ort007295	232.034	-2.52492	1.61932	-1.55925	0.118938	0.995599			ort007339	932.137	-2.04729	1.29578	-1.57997
ort011408	43.3898	-4.34788	2.40712	-1.80626	0.0708777	NA			ort002410	1324.57	-1.57434	1.02739	-1.53237	0.125432	0.99619			ort003932	523.462	1.83838	1.22086	1.5058	0.132118	0.999594			ort003316	1241.6	-1.92392	1.24684	-1.54304	0.122821	0.999868			ort010096	33.4037	4.99004	3.20033	1.55922	0.118943	NA			ort007834	487.609	2.21151	1.39974	1.57995
ort009105	7481.27	-3.62453	2.00691	-1.80602	0.070915	0.180981			ort001478	1545.8	-1.55	1.01224	-1.53125	0.125707	0.99619			ort009516	3976.41	1.47654	0.980612	1.50573	0.132136	0.999594			ort001874	13277.1	-1.78722	1.15826	-1.54302	0.122826	0.999868			ort010483	233.37	2.52001	1.61682	1.55862	0.119085	0.995599			ort011428	5362.26	1.88065	1.19073	1.57941
ort010395	455.115	-3.69291	2.04508	-1.80575	0.0709575	NA			ort010743	4348.11	1.45733	0.952459	1.53007	0.126	0.99619			ort009135	3109.64	1.49331	0.992009	1.50534	0.132236	0.999594			ort008988	952.925	1.96553	1.27439	1.54233	0.122994	0.999868			ort005621	456.426	-2.19219	1.40655	-1.55856	0.119101	0.995599			ort006708	9894.48	-1.86159	1.1796	-1.57816
ort004831	21.1564	6.28287	3.4807	1.80506	0.0710659	NA			ort002506	208.634	2.23894	1.46477	1.52852	0.126382	0.99619			ort006129	37.5053	4.3673	2.90197	1.50494	0.132339	NA			ort003844	371.208	-2.22939	1.4457	-1.54208	0.123055	0.999868			ort003190	1331.65	1.92436	1.23587	1.55709	0.119449	0.995599			ort010888	197.407	2.63687	1.67232	1.57678
ort009025	661.232	-3.66764	2.03218	-1.80478	0.0711087	NA			ort001270	115.599	2.70961	1.77312	1.52816	0.126472	0.99619			ort001478	2298.44	-1.51985	1.01022	-1.50447	0.13246	0.999594			ort003072	394.555	-2.20543	1.43019	-1.54206	0.12306	0.999868			ort005070	2060.25	-1.86986	1.20114	-1.55674	0.119532	0.995599			ort001216	1465.96	-1.96795	1.24903	-1.57558
ort001268	266.524	3.8111	2.11224	1.80429	0.0711854	NA			ort011120	2079.8	-1.50951	0.987958	-1.52791	0.126535	0.99619			ort009368	177.616	-2.43652	1.61956	-1.50444	0.132469	NA			ort009387	764.165	-2.007	1.30258	-1.54079	0.123368	0.999868			ort002108	115.186	-3.06864	1.9726	-1.55563	0.119795	NA			ort005980	50.1366	-4.11083	2.60923	-1.57549
ort004622	49.0366	5.00886	2.77623	1.8042	0.0712005	NA			ort010961	2339.86	1.49712	0.980236	1.5273	0.126685	0.99619			ort000365	330.233	-2.03925	1.35584	-1.50405	0.132568	0.999594			ort006131	271.087	2.36801	1.53711	1.54056	0.123424	0.999868			ort007942	52.3656	-4.06921	2.61592	-1.55555	0.119814	NA			ort005096	295.452	2.4045	1.52633	1.57535
ort002047	458.408	-3.68809	2.04431	-1.80407	0.0712201	NA			ort011197	2306.75	1.49817	0.981049	1.52711	0.126733	0.99619			ort004331	895.016	1.67348	1.11283	1.50381	0.13263	0.999594			ort010065	530.759	2.10085	1.36377	1.54048	0.123444	0.999868			ort008326	4699.37	-1.81022	1.16387	-1.55535	0.119863	0.995599			ort011248	54.7866	-3.96754	2.51869	-1.57524
ort010639	48.1595	-4.27233	2.3683	-1.80396	0.0712369	NA			ort004468	1089.82	-1.59851	1.04719	-1.52647	0.126893	0.99619			ort001464	3174.29	1.48833	0.990131	1.50317	0.132796	0.999594			ort007130	4808.4	1.80803	1.17375	1.54038	0.123468	0.999868			ort010065	717.639	2.0433	1.31413	1.55487	0.119976	0.995599			ort001229	491.077	-2.19996	1.39675	-1.57505
ort007047	52.9293	-4.21295	2.33664	-1.803	0.071389	NA			ort008675	39.4793	4.14343	2.7149	1.52618	0.126965	0.99619			ort005433	56.468	-3.69834	2.46088	-1.50285	0.132878	NA			ort001129	68.8321	-3.50736	2.27817	-1.53956	0.123669	NA			ort002859	301.12	2.36635	1.52256	1.5542	0.120137	0.995599			ort005770	506.429	2.18793	1.38952	1.5746
ort006426	501.675	-3.67651	2.04026	-1.80198	0.0715479	NA			ort000087	184.029	-2.31786	1.51878	-1.52613	0.126978	0.99619			ort003840	704.329	-1.73502	1.15504	-1.50214	0.133062	0.999594			ort007272	602.212	-2.06238	1.33982	-1.53929	0.123733	0.999868			ort008004	402.342	-2.23088	1.43609	-1.55344	0.120318	0.995599			ort000110	45.031	-4.2869	2.72503	-1.57316
ort004819	813.404	-3.64817	2.02583	-1.80083	0.0717296	NA			ort005433	88.1608	-2.97744	1.95155	-1.52568	0.127089	0.99619			ort004457	613.501	1.77595	1.18258	1.50177	0.133157	0.999594			ort006128	560.945	2.08059	1.35227	1.53859	0.123904	0.999868			ort001484	2363.41	1.85058	1.19147	1.55318	0.120379	0.995599			ort007268	2814.87	1.90044	1.20857	1.57247
ort008603	3228.6	-3.6165	2.00864	-1.80047	0.0717868	0.182572			ort002188	14685.2	-1.41381	0.92679	-1.52549	0.127138	0.99619			ort008147	77.1793	3.24452	2.16077	1.50156	0.133211	NA			ort001643	16.8057	-7.49676	4.87314	-1.53838	0.123955	NA			ort005433	64.0276	-3.75471	2.41784	-1.55292	0.120443	NA			ort010520	60.6068	3.7842	2.40759	1.57178
ort002934	27.6033	-4.71044	2.61938	-1.7983	0.0721289	NA			ort007273	388.868	-1.89729	1.24403	-1.52511	0.127232	0.99619			ort008296	1219.97	1.60384	1.06831	1.50128	0.133284	0.999594			ort000326	286.686	2.3339	1.51762	1.53787	0.124081	0.999868			ort004657	3396.64	1.82302	1.17401	1.55281	0.120469	0.995599			ort005786	327.643	-2.34886	1.4948	-1.57136
ort000715	204.593	-3.76168	2.09189	-1.79822	0.0721416	NA			ort006610	66.9342	-3.30535	2.16771	-1.52481	0.127307	0.99619			ort003627	778.284	1.70326	1.13513	1.5005	0.133485	0.999594			ort007227	1830.36	1.86641	1.2138	1.53766	0.124131	0.999868			ort011348	820.566	2.0062	1.29219	1.55256	0.120529	0.995599			ort011467	1823.24	1.93371	1.23104	1.57079
ort011339	48.5288	4.99338	2.77706	1.79808	0.072164	NA			ort000916	1003.18	1.61136	1.05706	1.52438	0.127415	0.99619			ort009075	1226.12	-1.60049	1.06735	-1.4995	0.133744	0.999594			ort002465	265.546	2.37159	1.54238	1.53761	0.124143	0.999868			ort002703	1972.3	-1.86665	1.20232	-1.55254	0.120533	0.995599			ort004376	3714.12	1.88023	1.19725	1.57047
ort006860	366.136	-3.68558	2.05209	-1.79601	0.0724923	NA			ort002141	15.6082	7.32656	4.80757	1.52396	0.127518	0.99619			ort009996	8233.69	1.43364	0.956372	1.49904	0.133863	0.999594			ort008466	30.6687	-4.87365	3.16977	-1.53754	0.124161	NA			ort011599	615.241	2.07979	1.3401	1.55197	0.12067	0.995599			ort005266	467.412	2.20315	1.40391	1.5693
ort004994	59.3455	-4.12549	2.29923	-1.79429	0.072767	NA			ort002696	15.6082	7.32656	4.80757	1.52396	0.127518	0.99619			ort009283	63.4734	3.48637	2.32765	1.49781	0.134184	NA			ort011599	573.521	2.07148	1.34751	1.53726	0.124229	0.999868			ort009634	258.811	-2.44158	1.57361	-1.55158	0.120763	0.995599			ort000792	1125.18	1.99204	1.26964	1.56898
ort003444	262.123	3.78536	2.11029	1.79376	0.0728508	NA			ort008535	15.6082	7.32656	4.80757	1.52396	0.127518	0.99619			ort001390	22.3581	5.66097	3.77952	1.4978	0.134184	NA			ort006908	175.943	2.61331	1.70123	1.53613	0.124506	0.999868			ort003132	38.8199	4.60862	2.97081	1.5513	0.12083	NA			ort000438	334.757	-2.33388	1.48753	-1.56896
ort006316	91.257	-3.93908	2.19748	-1.79254	0.0730458	NA			ort003374	1035.46	-1.6037	1.05257	-1.5236	0.127609	0.99619			ort007234	652.028	1.74921	1.16798	1.49763	0.134228	0.999594			ort001191	1089.61	-1.9293	1.25632	-1.53567	0.124618	0.999868			ort009513	728.056	2.03044	1.30978	1.55021	0.121092	0.995599			ort003157	14745.5	1.83812	1.1716	1.56889
ort002188	14158.3	-3.58731	2.00186	-1.79199	0.0731349	0.185201			ort003143	252.842	2.10937	1.38462	1.52343	0.127651	0.99619			ort006190	682.762	1.73506	1.15862	1.49753	0.134256	0.999594			ort003532	447.225	-2.14557	1.39728	-1.53553	0.124653	0.999868			ort005954	466.833	2.16561	1.39742	1.54972	0.121209	0.995599			ort007210	6794.78	1.85335	1.18145	1.5687
ort001122	1925.17	-3.59922	2.00984	-1.7908	0.0733246	0.185201			ort004704	2356.59	-1.49017	0.978388	-1.52309	0.127736	0.99619			ort010737	79.3435	3.1974	2.13557	1.49721	0.134339	NA			ort009516	3711.49	1.81028	1.1791	1.53531	0.124708	0.999868			ort009337	657.966	-2.05568	1.32666	-1.54952	0.121258	0.995599			ort008524	18279.6	1.83327	1.16945	1.56764
ort011590	1003.78	-3.60633	2.01771	-1.78734	0.0738819	NA			ort005301	179.383	-2.32769	1.5291	-1.52226	0.127944	0.99619			ort005641	243.971	2.19371	1.46549	1.49691	0.134416	0.999594			ort010937	2154.37	-1.84595	1.20268	-1.53487	0.124817	0.999868			ort000333	117.205	-3.03332	1.95812	-1.5491	0.121358	NA			ort003143	199.965	2.60346	1.66185	1.5666
ort007800	24.4798	-4.80355	2.68846	-1.78673	0.0739815	NA			ort005542	557.486	-1.75775	1.15493	-1.52195	0.128022	0.99619			ort011400	47.5147	-3.95139	2.64121	-1.49605	0.13464	NA			ort004072	176.035	-2.60949	1.70043	-1.5346	0.124881	0.999868			ort006129	32.913	4.96801	3.20942	1.54795	0.121635	NA			ort002594	17.7726	-7.46024	4.76738	-1.56485
ort011524	24.4798	-4.80355	2.68846	-1.78673	0.0739815	NA			ort000095	63.8184	-3.3567	2.20671	-1.52113	0.128227	0.99619			ort005269	120.437	-2.75082	1.83966	-1.49529	0.134839	NA			ort004925	655.526	2.02902	1.32274	1.53395	0.125041	0.999868			ort007471	51.8561	-4.05426	2.62	-1.54743	0.121761	NA			ort005618	81.8679	-3.38944	2.16705	-1.56408
ort003267	60.9918	-4.08897	2.28889	-1.78644	0.0740273	NA			ort004899	12135.9	1.41085	0.927583	1.521	0.12826	0.99619			ort001260	48.0366	3.89116	2.60228	1.49529	0.134839	NA			ort008378	183.483	-2.57926	1.68171	-1.53371	0.125102	0.999868			ort001385	55.9133	-3.93341	2.54269	-1.54695	0.121875	NA			ort010147	447.857	2.2066	1.41088	1.56398
ort011467	544.249	3.66068	2.05028	1.78545	0.0741881	NA			ort010279	74.0894	3.17186	2.08578	1.52071	0.128333	0.99619			ort004714	37.6947	-4.37689	2.9287	-1.49448	0.13505	NA			ort006018	792.018	-1.98384	1.29388	-1.53324	0.125216	0.999868			ort007033	57.0503	3.9065	2.52553	1.5468	0.12191	NA			ort008994	1540.17	1.93667	1.23931	1.56269
ort008163	451.53	-3.6408	2.03952	-1.78513	0.074241	NA			ort008532	329.156	1.96473	1.29221	1.52045	0.128399	0.99619			ort004198	886.506	1.65921	1.11047	1.49414	0.135138	0.999594			ort004816	256.983	2.37556	1.55051	1.53212	0.125493	0.999868			ort003247	18028.1	1.76085	1.13862	1.54647	0.12199	0.995599			ort006592	48.8164	4.07497	2.60785	1.56258
ort000748	430.805	-3.64007	2.041	-1.78347	0.0745094	NA			ort010123	29.4356	4.74652	3.12252	1.52009	0.128487	0.99619			ort001229	458.3	-1.86598	1.25014	-1.49262	0.135537	0.999594			ort002326	620.294	2.0361	1.33032	1.53054	0.125884	0.999868			ort009524	3665.52	1.80706	1.16857	1.54639	0.12201	0.995599			ort001454	121.718	-2.97723	1.90549	-1.56245
ort004755	37.1429	-4.38852	2.46171	-1.78271	0.0746338	NA			ort010008	99.1844	2.83967	1.86862	1.51966	0.128596	0.99619			ort005522	391.869	1.93001	1.29359	1.49198	0.135705	0.999594			ort002519	92.3395	3.14279	2.05388	1.53017	0.125974	NA			ort002879	287.608	-2.37013	1.53347	-1.54561	0.1222	0.995599			ort002879	241.369	-2.47683	1.5879	-1.55982
ort003851	256.261	-3.68823	2.06943	-1.78224	0.0747095	NA			ort009255	1259.95	1.56221	1.02834	1.51916	0.128722	0.99619			ort011552	150.185	2.53512	1.69954	1.49165	0.135791	NA			ort007464	35.3702	4.51426	2.95042	1.53004	0.126007	NA			ort009901	425.296	2.19058	1.41787	1.54498	0.122352	0.995599			ort004281	24.0454	5.69382	3.65462	1.55798
ort006074	46.6824	-4.22502	2.37117	-1.78183	0.0747769	NA			ort005971	43.3187	3.94399	2.59838	1.51786	0.129049	0.99619			ort004850	1221.85	1.5876	1.06436	1.4916	0.135803	0.999594			ort001071	1227.77	-1.89991	1.24178	-1.52999	0.12602	0.999868			ort008524	20309.5	1.75371	1.13647	1.54312	0.122801	0.995599			ort004988	24.0454	5.69382	3.65462	1.55798
ort001617	62.6382	-4.0551	2.27917	-1.7792	0.0752067	NA			ort007235	2710.08	1.46989	0.9687	1.51738	0.129171	0.99619			ort000817	68.3788	3.36065	2.25553	1.48996	0.136235	NA			ort002565	23.7602	5.55666	3.63275	1.5296	0.126116	NA			ort003118	797.372	1.99426	1.29247	1.54299	0.122834	0.995599			ort005231	24.0454	5.69382	3.65462	1.55798
ort007303	336.548	-3.64692	2.05127	-1.77788	0.0754232	NA			ort010680	653.744	-1.70172	1.1216	-1.51723	0.129209	0.99619			ort008537	68.3788	3.36065	2.25553	1.48996	0.136235	NA			ort005459	23.7602	5.55666	3.63275	1.5296	0.126116	NA			ort002372	119.224	-2.99984	1.9442	-1.54296	0.122839	NA			ort003190	1405.49	1.93891	1.24456	1.5579
ort009538	230.766	-3.6907	2.07594	-1.77784	0.07543	NA			ort011493	88.0836	2.95806	1.95061	1.51648	0.129397	0.99619			ort011572	2024.41	1.51021	1.01383	1.48961	0.136327	0.999594			ort008760	23.7602	5.55666	3.63275	1.5296	0.126116	NA			ort009209	199.142	-2.58433	1.67512	-1.54277	0.122887	0.995599			ort003724	16.4579	7.617	4.88947	1.55784
ort001307	331.778	-3.64603	2.0518	-1.77699	0.0755695	NA			ort006182	505.657	-1.78076	1.17435	-1.51638	0.129424	0.99619			ort008464	112.961	2.78659	1.87196	1.48859	0.136595	NA			ort009481	81.2352	-3.27908	2.14383	-1.52954	0.12613	NA			ort007370	380.075	-2.23128	1.44642	-1.54262	0.122922	0.995599			ort002170	1909.75	1.90122	1.22178	1.55611
ort005141	957.098	-3.58131	2.01563	-1.77677	0.0756058	NA			ort010706	23.2313	5.42456	3.57922	1.51557	0.129627	0.99619			ort005706	328.526	2.00762	1.34876	1.48849	0.136623	0.999594			ort002949	665.573	2.0155	1.31798	1.52924	0.126205	0.999868			ort002676	191.871	2.61009	1.69205	1.54256	0.122938	0.995599			ort006028	181.414	2.64109	1.69761	1.55578
ort002001	11.986	-6.12543	3.44784	-1.7766	0.075634	NA			ort009995	3018.11	1.4577	0.962405	1.51464	0.129863	0.99619			ort005667	824.749	1.66638	1.11992	1.48794	0.136766	0.999594			ort009073	683.229	-2.0078	1.31353	-1.52855	0.126376	0.999868			ort007879	407.991	2.20156	1.42741	1.54235	0.122989	0.995599			ort008645	1289.04	-1.94663	1.25131	-1.55567
ort002851	11.986	-6.12543	3.44784	-1.7766	0.075634	NA			ort006989	14.8	-7.41016	4.89384	-1.51418	0.129981	0.99619			ort007036	237.68	-2.19118	1.47382	-1.48673	0.137085	0.999594			ort003107	481.917	2.10393	1.37707	1.52784	0.126553	0.999868			ort011227	6043.3	-1.77699	1.15225	-1.54219	0.123028	0.995599			ort004876	1273.9	-1.94783	1.25227	-1.55543
ort004553	11.986	-6.12543	3.44784	-1.7766	0.075634	NA			ort006814	247.681	-2.10082	1.38777	-1.51381	0.130074	0.99619			ort002307	497.427	-1.82275	1.22607	-1.48665	0.137106	0.999594			ort007193	17170.2	-1.75596	1.14933	-1.52781	0.126561	0.999868			ort001111	17.6644	7.55809	4.90165	1.54195	0.123086	NA			ort009482	78.7018	3.39416	2.18301	1.55481
ort005414	11.986	-6.12543	3.44784	-1.7766	0.075634	NA			ort011651	1343.43	-1.54219	1.01945	-1.51277	0.130339	0.99619			ort007629	99.0658	-2.92313	1.96772	-1.48554	0.137401	NA			ort003842	1105.06	-1.91074	1.25097	-1.52741	0.12666	0.999868			ort004102	17.6644	7.55809	4.90165	1.54195	0.123086	NA			ort011448	29.987	4.99551	3.21711	1.5528
ort006414	11.986	-6.12543	3.44784	-1.7766	0.075634	NA			ort005384	1250.24	-1.55264	1.02674	-1.5122	0.130482	0.99619			ort003060	1797.44	1.51544	1.02139	1.4837	0.137889	0.999594			ort008777	136.158	2.7804	1.82057	1.52722	0.126707	NA			ort010755	17.6644	7.55809	4.90165	1.54195	0.123086	NA			ort000461	926.956	-1.99432	1.28447	-1.55265
ort007117	11.986	-6.12543	3.44784	-1.7766	0.075634	NA			ort008742	34.2209	4.3632	2.88746	1.51109	0.130766	0.99619			ort003847	328.787	-1.99952	1.34776	-1.48359	0.137917	0.999594			ort004714	35.623	-4.49033	2.94139	-1.5266	0.12686	NA			ort011169	17.6644	7.55809	4.90165	1.54195	0.123086	NA			ort007170	239.546	-2.46392	1.58705	-1.55252
ort009924	11.986	-6.12543	3.44784	-1.7766	0.075634	NA			ort006416	50.5245	3.66166	2.42628	1.50916	0.131257	0.99619			ort009834	70.0416	-3.32708	2.24317	-1.4832	0.13802	NA			ort009669	148.734	-2.70931	1.77519	-1.52621	0.126958	NA			ort009494	32.0609	-4.98497	3.2334	-1.54171	0.123144	NA			ort007681	6176.79	1.82656	1.17651	1.55252
ort010171	11.986	-6.12543	3.44784	-1.7766	0.075634	NA			ort001836	2295.44	-1.47189	0.97547	-1.50891	0.131322	0.99619			ort001808	453.195	1.85103	1.24807	1.48311	0.138045	0.999594			ort007967	12392.8	-1.75605	1.15115	-1.52548	0.127138	0.999868			ort004934	127.32	-2.9353	1.90393	-1.5417	0.123146	NA			ort007049	4817.33	1.83525	1.18214	1.55248
ort005780	20.1408	6.2119	3.4976	1.77604	0.0757256	NA			ort010148	42.8457	3.92711	2.60369	1.50829	0.13148	0.99619			ort007248	2630.74	1.47289	0.99323	1.48293	0.138094	0.999594			ort005932	1783.96	1.84472	1.20967	1.52498	0.127264	0.999868			ort002170	2806.56	1.8151	1.17778	1.54112	0.123287	0.995599			ort003440	351.999	-2.27292	1.46529	-1.55118
ort001284	21.3564	-4.93283	2.77861	-1.77528	0.0758511	NA			ort000597	709.412	-1.66282	1.10334	-1.50708	0.131789	0.99619			ort000260	66.4316	-3.39419	2.28996	-1.48221	0.138285	NA			ort008294	143.274	-2.73464	1.79325	-1.52496	0.127269	NA			ort002130	523.549	-2.10715	1.36745	-1.54093	0.123333	0.995599			ort003267	101.109	-3.12103	2.0123	-1.55098
ort005914	21.3564	-4.93283	2.77861	-1.77528	0.0758511	NA			ort000634	98.4542	-2.8086	1.86428	-1.50653	0.131932	0.99619			ort002617	31.4849	-4.71608	3.18273	-1.48177	0.138401	NA			ort001296	39.9107	4.26196	2.79486	1.52493	0.127277	NA			ort002946	4185.69	-1.78945	1.16164	-1.54046	0.123448	0.995599			ort005176	38.5582	-4.48719	2.89324	-1.55092
ort006985	21.3564	-4.93283	2.77861	-1.77528	0.0758511	NA			ort010446	2564.57	1.45767	0.968039	1.5058	0.132118	0.99619			ort008838	178.77	-2.37763	1.60459	-1.48176	0.138403	NA			ort008030	118.95	-2.88737	1.8937	-1.52473	0.127327	NA			ort010641	138.501	2.85549	1.85499	1.53935	0.123718	0.995599			ort005522	369.823	2.24962	1.45089	1.55051
ort003800	65.577	4.40583	2.48224	1.77495	0.0759069	NA			ort002471	513.725	-1.75687	1.16686	-1.50564	0.132159	0.99619			ort010902	264.536	-2.11479	1.42729	-1.48168	0.138426	0.999594			ort011111	1314.06	1.8799	1.23304	1.5246	0.127358	0.999868			ort001173	106.891	3.09359	2.01178	1.53773	0.124114	NA			ort005806	3374.13	-1.84393	1.19124	-1.54791
ort000689	815.712	3.60271	2.02979	1.77492	0.0759118	NA			ort011541	2158.32	1.47009	0.977747	1.50355	0.132697	0.99619			ort009802	3081.09	1.45654	0.983415	1.4811	0.13858	0.999594			ort005391	724.979	-1.98542	1.30241	-1.52442	0.127404	0.999868			ort002594	17.323	-7.58423	4.93215	-1.53771	0.124119	NA			ort003936	334.553	2.28485	1.47651	1.54746
ort000819	841.946	-3.57945	2.01753	-1.77417	0.0760349	NA			ort011033	1386.09	1.5228	1.01323	1.50291	0.132863	0.99619			ort005044	94.4929	2.94918	1.99161	1.4808	0.138659	NA			ort004304	188.955	-2.53418	1.66354	-1.52337	0.127667	0.999868			ort004135	7102.55	-1.76199	1.14669	-1.53659	0.124394	0.995599			ort002491	116.612	-2.97393	1.92199	-1.54731
ort011363	110.675	-3.82851	2.15852	-1.77368	0.0761163	NA			ort000193	15.1352	7.28216	4.84685	1.50245	0.132981	0.99619			ort008378	181.08	-2.36564	1.59756	-1.48078	0.138666	NA			ort006818	3125.67	1.79715	1.17985	1.5232	0.127708	0.999868			ort005719	4666.33	-1.77709	1.15669	-1.53636	0.124451	0.995599			ort011621	10971.5	1.80361	1.16564	1.54731
ort000793	65.4077	4.40193	2.4823	1.77332	0.0761749	NA			ort000204	15.1352	7.28216	4.84685	1.50245	0.132981	0.99619			ort001901	120.463	2.70352	1.82582	1.48071	0.138683	NA			ort002225	1187.27	1.89135	1.24175	1.52313	0.127725	0.999868			ort005589	6691.9	-1.76165	1.1474	-1.53534	0.1247	0.995599			ort002204	2659.22	1.85755	1.20053	1.54728
ort009557	29.2496	-4.56605	2.57502	-1.77321	0.0761934	NA			ort007050	15.1352	7.28216	4.84685	1.50245	0.132981	0.99619			ort008675	80.3538	3.13098	2.1148	1.48051	0.138737	NA			ort002754	605.247	-2.02522	1.33053	-1.52212	0.127979	0.999868			ort011573	710.826	2.00666	1.30716	1.53513	0.124753	0.995599			ort009991	17.3169	-7.42277	4.79744	-1.54724
ort004101	1253.43	-3.55412	2.00893	-1.76916	0.0768665	NA			ort008720	15.1352	7.28216	4.84685	1.50245	0.132981	0.99619			ort005654	323.3	-2.00109	1.35198	-1.48011	0.138843	0.999594			ort005170	23.7372	-5.52132	3.62857	-1.52162	0.128104	NA			ort004198	1082.47	1.91622	1.24859	1.5347	0.124856	0.995599			ort004774	100.654	-3.11377	2.01287	-1.54693
ort000870	255.123	-3.65301	2.06574	-1.76838	0.0769973	NA			ort010539	15.1352	7.28216	4.84685	1.50245	0.132981	0.99619			ort001059	16.8987	-7.31474	4.94201	-1.48011	0.138843	NA			ort003452	16.185	7.47565	4.92069	1.51923	0.128705	NA			ort010971	5869.19	-1.7645	1.14993	-1.53443	0.124923	0.995599			ort001191	1204.23	-1.93923	1.25382	-1.54666
ort009907	632.367	-3.57628	2.02299	-1.76782	0.0770913	NA			ort008949	94.872	2.83967	1.8903	1.50223	0.133038	0.99619			ort004173	909.345	-1.62932	1.10104	-1.47981	0.138924	0.999594			ort004978	545.139	-2.04699	1.3479	-1.51865	0.12885	0.999868			ort005917	1162.95	-1.9031	1.24037	-1.5343	0.124957	0.995599			ort009891	5077.97	-1.82177	1.17831	-1.54608
ort007689	158.773	3.84354	2.17426	1.76775	0.0771033	NA			ort010713	78.4573	3.04912	2.02981	1.50217	0.133053	0.99619			ort005231	27.4072	4.93664	3.336	1.47981	0.138925	NA			ort000461	1172.19	-1.88419	1.24085	-1.51846	0.128898	0.999868			ort006023	126.65	2.9206	1.90375	1.53413	0.124999	NA			ort005934	34.8315	4.61338	2.98765	1.54415
ort010676	2401.62	-3.53764	2.00142	-1.76757	0.0771336	0.193588			ort000978	2425.99	1.4545	0.969478	1.50029	0.133538	0.99619			ort000929	21.7811	5.6225	3.8	1.4796	0.138979	NA			ort007733	192.036	2.51058	1.65355	1.51829	0.12894	0.999868			ort000986	234.899	2.45772	1.60237	1.5338	0.125078	0.995599			ort009189	476.039	-2.14513	1.3893	-1.54404
ort011146	1632.65	-3.54337	2.00498	-1.76729	0.0771801	0.193588			ort004774	67.9357	-3.21093	2.14069	-1.49995	0.133628	0.99619			ort008952	704.699	1.6939	1.14488	1.47954	0.138995	0.999594			ort004019	895.45	1.92802	1.2703	1.51777	0.129072	0.999868			ort000385	136.925	-2.84947	1.85781	-1.53378	0.125085	0.995599			ort010065	758.777	2.01636	1.30645	1.54339
ort009387	316.16	-3.62557	2.05168	-1.76713	0.077207	NA			ort000975	33.748	4.34214	2.8956	1.49956	0.133728	0.99619			ort004821	4403.85	1.42929	0.966589	1.4787	0.139221	0.999594			ort003413	956.316	1.9128	1.2616	1.51618	0.129475	0.999868			ort005129	184.97	-2.61177	1.70366	-1.53304	0.125267	0.995599			ort004821	7342.41	1.80501	1.16962	1.54325
ort008726	19.8023	6.18745	3.50365	1.766	0.0773955	NA			ort008514	107.447	2.70683	1.80535	1.49934	0.133785	0.99619			ort007165	1135.01	-1.58026	1.06879	-1.47855	0.13926	0.999594			ort006075	337.976	-2.20643	1.45689	-1.51448	0.129905	0.999868			ort010806	2976.5	1.79627	1.17183	1.53288	0.125306	0.995599			ort008339	177.349	-2.62851	1.70345	-1.54305
ort006921	32537.4	-3.52112	1.9941	-1.76577	0.0774351	0.193588			ort002929	621.864	1.68566	1.12468	1.49879	0.133927	0.99619			ort001500	72.7072	3.24601	2.19555	1.47845	0.139287	NA			ort008842	527.667	2.04698	1.35173	1.51433	0.129941	0.999868			ort002124	94.9189	-3.19867	2.08839	-1.53165	0.125609	NA			ort003560	1323.8	-1.91775	1.24339	-1.54236
ort000578	637.475	-3.56736	2.02181	-1.76444	0.0776572	NA			ort001220	202.919	-2.19274	1.46302	-1.49878	0.13393	0.99619			ort001537	124.215	2.66689	1.80479	1.47767	0.139495	NA			ort010699	501.93	-2.05958	1.36116	-1.5131	0.130255	0.999868			ort008022	897.411	1.94569	1.27053	1.53141	0.125669	0.995599			ort009033	23.4968	5.65988	3.67059	1.54195
ort005542	497.797	-3.57972	2.02966	-1.7637	0.0777826	NA			ort001395	3405.58	1.42656	0.951931	1.4986	0.133978	0.99619			ort000326	255.372	2.12363	1.43743	1.47737	0.139575	0.999594			ort008337	198.071	2.47747	1.63764	1.51283	0.130323	0.999868			ort009189	468.447	-2.12546	1.38815	-1.53114	0.125734	0.995599			ort002354	29.4384	4.96803	3.22831	1.53889
ort001164	15.1095	-5.44739	3.09076	-1.76248	0.0779889	NA			ort010365	2462.63	1.4506	0.96804	1.49849	0.134005	0.99619			ort009726	5288.24	-1.41797	0.95986	-1.47726	0.139605	0.999594			ort007786	387.163	-2.14694	1.41982	-1.51212	0.130503	0.999868			ort009012	67.411	3.61244	2.35946	1.53104	0.125759	NA			ort007348	29.4384	4.96803	3.22831	1.53889
ort002672	15.1095	-5.44739	3.09076	-1.76248	0.0779889	NA			ort006557	1777.51	-1.48342	0.989941	-1.49849	0.134006	0.99619			ort004126	6035.97	1.412	0.955855	1.47721	0.13962	0.999594			ort002659	55.9462	-3.68104	2.43548	-1.51142	0.130681	NA			ort005572	162.212	-2.70338	1.76597	-1.53082	0.125813	0.995599			ort005288	182.092	-2.59982	1.68957	-1.53875
ort010518	15.1095	-5.44739	3.09076	-1.76248	0.0779889	NA			ort010578	1052.27	-1.56152	1.0421	-1.49843	0.134021	0.99619			ort005749	317.813	-2.00272	1.35634	-1.47656	0.139794	0.999594			ort005886	445.294	-2.09487	1.38623	-1.5112	0.130738	0.999868			ort003440	410.344	-2.1705	1.41977	-1.52877	0.126321	0.995599			ort011603	8432.11	1.7929	1.16548	1.53833
ort005693	56.3913	-4.04749	2.30179	-1.75841	0.0786778	NA			ort001516	3357.9	1.42603	0.95222	1.49758	0.134241	0.99619			ort009035	2987.59	1.45053	0.983055	1.47553	0.14007	0.999594			ort007261	208.336	-2.44255	1.61653	-1.51098	0.130794	0.999868			ort000950	21886.7	1.72813	1.13047	1.52868	0.126343	0.995599			ort010085	2175.24	1.85632	1.20683	1.53817
ort002485	646.661	3.57	2.03327	1.75579	0.0791237	NA			ort005202	165.389	-2.33024	1.55714	-1.49648	0.134527	0.99619			ort001633	381.338	1.90966	1.29451	1.4752	0.140159	0.999594			ort002491	76.2809	-3.28873	2.17722	-1.51052	0.130911	NA			ort005938	171.131	2.65575	1.73838	1.52771	0.126584	0.995599			ort001418	68.0085	3.51555	2.28626	1.53769
ort005305	19.4638	6.16257	3.50991	1.75576	0.0791288	NA			ort001714	17724.7	-1.36983	0.915923	-1.49557	0.134766	0.99619			ort007652	67.2249	3.33369	2.26065	1.47466	0.140305	NA			ort001405	3477.59	1.7667	1.16998	1.51003	0.131035	0.999868			ort011551	778.67	1.9687	1.28925	1.52702	0.126756	0.995599			ort011586	357.383	-2.23708	1.45491	-1.53761
ort009045	545.034	-3.55189	2.02428	-1.75465	0.07932	NA			ort007237	1114.44	1.54546	1.03402	1.49462	0.135014	0.99619			ort002640	91.8457	-2.97151	2.01623	-1.47379	0.140537	NA			ort011180	464.674	-2.07724	1.37603	-1.50959	0.131148	0.999868			ort001183	24.9467	-5.63916	3.69584	-1.52581	0.127056	NA			ort008375	1533.95	-1.89036	1.22941	-1.53761
ort005618	75.6397	-3.9031	2.2246	-1.75452	0.0793418	NA			ort000823	682.065	-1.65254	1.10575	-1.4945	0.135045	0.99619			ort006416	64.4837	3.38511	2.29706	1.47367	0.14057	NA			ort011068	796.098	-1.93109	1.28076	-1.50777	0.131615	0.999868			ort001467	874.69	1.93958	1.27158	1.52534	0.127175	0.995599			ort007055	989.078	-1.95335	1.27046	-1.53752
[truncated: 9,564 more rows]
[truncated: 9 more columns]
